# Supplementary material for: RNA Sequencing Reveals Differential Expression of Mitochondrial and Oxidation Reduction Genes in the Long-Lived Naked Mole-Rat When Compared to Mice
Source: PLoS One. 2011 Nov 3;6(11):e26729. doi: 10.1371/journal.pone.0026729 (PMC3207814; doi:10.1371/journal.pone.0026729)
Supplement: Dataset S1 — Full results from 76 bp Solexa run for all genes with at least one NMR read mapping to it. The ratio is computed with 100 pseudo-counts added to both counts. (XLS) [file pone.0026729.s001.xls]

## Sheet: All genes
Rank	Fold difference	NMR count	Mouse count	Gene symbol	Gene description	Ensembl ID
1	290.414	37073	27	Tacstd1	epithelial cell adhesion molecule	ENSMUSG00000045394
2	252.911	31261	23	Suclg2	Succinyl-CoA ligase	ENSMUSG00000061838
3	207.694	25654	23	Gulp1	PTB domain-containing engulfment adapter protein 1 (GULP)(PTB domain adapter protein CED-6)(Cell death protein 6 homolog)	ENSMUSG00000056870
4	189.76	31590	66	Acmsd	2-amino-3-carboxymuconate-6-semialdehyde decarboxylase (EC 4.1.1.45)	ENSMUSG00000026348
5	183.104	19309	5	Eif4g1	Eukaryotic translation initiation factor 4 gamma 1 (eIF-4-gamma 1)(eIF-4G 1)(eIF-4G1)	ENSMUSG00000045983
6	169.917	18421	8	Tyro3	Tyrosine-protein kinase receptor TYRO3 Precursor (EC 2.7.10.1)(Tyrosine-protein kinase RSE)(Tyrosine-protein kinase DTK)(TK19-2)(Etk2/tyro3)	ENSMUSG00000027298
7	154.246	19335	25	Upb1	Beta-ureidopropionase (EC 3.5.1.6)(Beta-alanine synthase)(N-carbamoyl-beta-alanine amidohydrolase)	ENSMUSG00000033427
8	146.485	14695	0	Tspan1	tetraspanin 1	ENSMUSG00000028699
9	143.881	202485	1307	A2m	Alpha-2-macroglobulin-P Precursor (Alpha-2-macroglobulin)	ENSMUSG00000030111
10	135.841	21227	56	Ugt1a10	UDP-glucuronosyltransferase 1-7C Precursor (UDPGT)(UGT1*7C)(EC 2.4.1.17)(UGT1-07C)(UGT1.7C)(UGT1A7C)(UGT1A10)	ENSMUSG00000054545
11	131.366	14613	11	Scd3	stearoyl-coenzyme A desaturase 3	ENSMUSG00000025202
12	123.647	12512	1	Rpl39l	ribosomal protein L39-like protein	ENSMUSG00000039209
13	122.536	74402	507	Rpl26	60S ribosomal protein L26 (Silica-induced gene 20 protein)(SIG-20)	ENSMUSG00000060938
14	112.543	21058	87	Fau	Ubiquitin-like protein FUBI (Monoclonal non-specific suppressor factor beta)(MNSF-beta)	ENSMUSG00000038274
15	107.67	11959	11	Amacr	Alpha-methylacyl-CoA racemase (EC 5.1.99.4)(2-methylacyl-CoA racemase)	ENSMUSG00000022244
16	104.567	19454	86	Crym	Mu-crystallin homolog	ENSMUSG00000030905
17	95.6992	11671	22	Upp2	Uridine phosphorylase 2 (UrdPase 2)(UPase 2)(EC 2.4.2.3)(Liver-specific uridine phosphorylase)(L-UrdPase)	ENSMUSG00000026839
18	90.783	9523	5	Moxd1	DBH-like monooxygenase protein 1 Precursor (EC 1.14.17.-)(Monooxygenase X)(DBH-related protein)	ENSMUSG00000020000
19	90.5363	16106	78	Mt2	Metallothionein-2 (MT-2)(Metallothionein-II)(MT-II)	ENSMUSG00000031762
20	88.3376	13769	56	Sdc2	Syndecan-2 Precursor (SYND2)(Fibroglycan)(Heparan sulfate proteoglycan core protein)(HSPG)	ENSMUSG00000022261
21	86.6783	9868	14	2210404O07Rik	Transmembrane protein HSPC323 homolog Precursor	ENSMUSG00000078439
22	85.6826	14209	66	Msrb2	Methionine-R-sulfoxide reductase B2, mitochondrial Precursor (EC 1.8.4.-)	ENSMUSG00000023094
23	79.791	14023	76	Slc12a7	Solute carrier family 12 member 7 (Electroneutral potassium-chloride cotransporter 4)(K-Cl cotransporter 4)	ENSMUSG00000017756
24	72.1748	7334	2	Zfp574	Zinc finger protein 574	ENSMUSG00000045252
25	68.8218	6851	0	Enah	Protein enabled homolog (NPC-derived proline-rich protein 1)(NDPP-1)	ENSMUSG00000022995
26	61.4295	28649	367	Csnk1d	Casein kinase I isoform delta (CKI-delta)(CKId)(EC 2.7.11.1)	ENSMUSG00000025162
27	60.2232	13932	132	Rps18	40S ribosomal protein S18 (Ke-3)(Ke3)	ENSMUSG00000008668
28	55.2143	7630	39	Ctnnal1	Alpha-catulin (Catenin alpha-like protein 1)(Alpha-catenin-related protein)(ACRP)	ENSMUSG00000038816
29	55.0256	6338	16	Cst3	Cystatin-C Precursor (Cystatin-3)	ENSMUSG00000027447
30	54.8916	29267	434	Saa3	Serum amyloid A-3 protein Precursor	ENSMUSG00000040026
31	53.534	5414	2	Lgals2	Galectin-2	ENSMUSG00000043501
32	53.087	25541	382	Acadsb	Short/branched chain specific acyl-CoA dehydrogenase, mitochondrial Precursor (SBCAD)(EC 1.3.99.-)(2-methyl branched chain acyl-CoA dehydrogenase)(2-MEBCAD)(2-methylbutyryl-coenzyme A dehydrogenase)(2-methylbutyryl-CoA dehydrogenase)	ENSMUSG00000030861
33	52.853	14646	178	Ociad2	OCIA domain-containing protein 2	ENSMUSG00000029153
34	52.0088	5829	13	Zfp292	zinc finger protein 292	ENSMUSG00000039967
35	51.7286	32489	529	Hmgcs2	Hydroxymethylglutaryl-CoA synthase, mitochondrial Precursor (HMG-CoA synthase)(EC 2.3.3.10)(3-hydroxy-3-methylglutaryl coenzyme A synthase)	ENSMUSG00000027875
36	47.0541	6864	47	Sec62	Translocation protein SEC62 (Translocation protein 1)(TP-1)	ENSMUSG00000027706
37	45.2266	20659	358	Sord	Sorbitol dehydrogenase (EC 1.1.1.14)(L-iditol 2-dehydrogenase)	ENSMUSG00000027227
38	45.0394	5620	26	Mrpl35	39S ribosomal protein L35, mitochondrial Precursor (L35mt)(MRP-L35)	ENSMUSG00000052962
39	44.1727	4759	9	Pkd1	Polycystin-1 Precursor (Autosomal dominant polycystic kidney disease 1 protein homolog)	ENSMUSG00000032855
40	43.8658	6436	48	Cd63	CD63 antigen (CD63 antigen)	ENSMUSG00000025351
41	43.6471	5836	35	Fzd1	Frizzled-1 Precursor (Fz-1)(mFz1)	ENSMUSG00000044674
42	42.7736	4434	5	Pck2	Phosphoenolpyruvate carboxykinase	ENSMUSG00000040618
43	42.5965	63454	1391	Cyp27a1	Cytochrome P450 27, mitochondrial Precursor (EC 1.14.13.15)(Cytochrome P-450C27/25)(Sterol 26-hydroxylase)(Sterol 27-hydroxylase)(Vitamin D(3) 25-hydroxylase)(5-beta-cholestane-3-alpha,7-alpha,12-alpha-triol 27-hydroxylase)	ENSMUSG00000026170
44	42.3922	4224	1	Eif3f	Eukaryotic translation initiation factor 3 subunit F (eIF3f)(Eukaryotic translation initiation factor 3 subunit 5)(eIF-3-epsilon)(eIF3 p47)	ENSMUSG00000031029
45	40.3836	5796	45	Vapb	Vesicle-associated membrane protein-associated protein B (VAMP-associated protein B)(VAMP-B)(VAP-B)(VAMP-associated protein 33b)	ENSMUSG00000054455
46	38.6635	3921	3	Psat1	Phosphoserine aminotransferase (PSAT)(EC 2.6.1.52)(Phosphohydroxythreonine aminotransferase)(Endometrial progesterone-induced protein)(EPIP)	ENSMUSG00000024640
47	38.6535	3804	0	Serpina1f	Alpha-1-antitrypsin 1-6 Precursor (Serine protease inhibitor 1-6)(Serine protease inhibitor A1f)(Alpha-1 protease inhibitor 6)(Alpha-1-antiproteinase)	ENSMUSG00000021081
48	38.1165	3826	2	Myl6	Myosin light polypeptide 6 (Smooth muscle and nonmuscle myosin light chain alkali 6)(Myosin light chain alkali 3)(Myosin light chain 3)(MLC-3)(LC17)	ENSMUSG00000060680
49	37.6207	10810	189	Numa1	nuclear mitotic apparatus protein 1	ENSMUSG00000066306
50	37.2727	9330	152	Sepw1	Selenoprotein W (SelW)	ENSMUSG00000041571
51	37.1412	12788	246	Hmox1	Heme oxygenase 1 (HO-1)(EC 1.14.99.3)(P32 protein)	ENSMUSG00000005413
52	36.6355	3820	6	Ptgr1	Prostaglandin reductase 1 (PRG-1)(EC 1.3.1.-)(NADP-dependent leukotriene B4 12-hydroxydehydrogenase)(EC 1.3.1.74)(15-oxoprostaglandin 13-reductase)(EC 1.3.1.48)	ENSMUSG00000028378
53	36.5339	4211	17	Mapkbp1	Mitogen-activated protein kinase-binding protein 1 (JNK-binding protein 1)(JNKBP1)	ENSMUSG00000033902
54	36.3891	8597	138	Herc1	Herc1 protein	ENSMUSG00000038664
55	36.0198	3538	0	Atp12a	Potassium-transporting ATPase alpha chain 2 (EC 3.6.3.10)(Proton pump)(Non-gastric H(+)/K(+) ATPase subunit alpha)	ENSMUSG00000022229
56	35.411	5070	45	Sdhc	Succinate dehydrogenase cytochrome b560 subunit, mitochondrial Precursor (Integral membrane protein CII-3)(QPs-1)(QPs1)	ENSMUSG00000058076
57	33.7576	6584	97	rp9	Retinitis pigmentosa 9 protein homolog (Pim-1-associated protein)(PAP-1)	ENSMUSG00000032239
58	32.6655	8883	174	Surf1	Surfeit locus protein 1	ENSMUSG00000015790
59	31.3069	3062	0	Zic5	zinc finger protein of the cerebellum 5	ENSMUSG00000041703
60	31.0943	3196	5	Gprasp2	G-protein coupled receptor-associated sorting protein 2 (GASP-2)	ENSMUSG00000072966
61	30.9649	9592	212	Giyd2	GIY-YIG domain-containing protein 1	ENSMUSG00000059772
62	29.5446	2884	0	Hrasls5	HRAS-like suppressor 5 (H-rev107-like protein 5)	ENSMUSG00000024973
63	29.5411	4213	45	Pdrg1	p53 and DNA damage-regulated protein 1	ENSMUSG00000027472
64	29.2143	3581	25	Gstm7	Glutathione S-transferase Mu 7 (EC 2.5.1.18)(GST class-mu 7)(GSTM-7)	ENSMUSG00000004035
65	29.1429	3164	11	Usp13	ubiquitin specific protease 13 (isopeptidase T-3)	ENSMUSG00000056900
66	27.9312	10458	277	Tmbim1	Transmembrane BAX inhibitor motif-containing protein 1 (Responsive to centrifugal force and shear stress gene 1 protein)(Protein RECS1)	ENSMUSG00000006301
67	27.8761	3050	12	Ncl	Nucleolin (Protein C23)	ENSMUSG00000026234
68	27.72	6137	124	AC138299.14-1	mortality factor 4 like 1 isoform b	ENSMUSG00000043223
69	27.6139	2689	0	Pgk2	Phosphoglycerate kinase 2 (EC 2.7.2.3)(Phosphoglycerate kinase, testis specific)	ENSMUSG00000031233
70	27.1275	2667	1	Igf2	Insulin-like growth factor II Precursor (Multiplication-stimulating polypeptide)(IGF-II)	ENSMUSG00000048583
71	26.5963	8597	226	Hsd17b11	Estradiol 17-beta-dehydrogenase 11 Precursor (EC 1.1.1.62)(17-beta-hydroxysteroid dehydrogenase 11)(17-beta-HSD 11)(17betaHSD11)(17bHSD11)(17-beta-HSD XI)(17betaHSDXI)(Dehydrogenase/reductase SDR family member 8)	ENSMUSG00000029311
72	26.5288	2659	3	Plekha2	Pleckstrin homology domain-containing family A member 2 (Tandem PH domain-containing protein 2)(TAPP-2)(PH domain-containing adaptor PHAD47)	ENSMUSG00000031557
73	26.322	5296	104	Dao1	D-amino-acid oxidase (DAMOX)(DAAO)(DAO)(EC 1.4.3.3)	ENSMUSG00000042096
74	25.1923	2520	3	Tmco1	Transmembrane and coiled-coil domain-containing protein 1	ENSMUSG00000052428
75	24.9215	4660	90	Grpel1	GrpE protein homolog 1, mitochondrial Precursor (Mt-GrpE#1)	ENSMUSG00000029198
76	24.6244	4751	96	Rhoq	Rho-related GTP-binding protein RhoQ Precursor (Ras-related GTP-binding protein TC10)	ENSMUSG00000024143
77	24.6	11339	364	Glyat	Glycine N-acyltransferase (EC 2.3.1.13)(Acyl-CoA	ENSMUSG00000063683
78	24.5478	2723	14	Gabpb2	GA-binding protein subunit beta-2 (GABP subunit beta-2)(GABPB-2)(GA-binding protein beta-2-1)(GABP subunit beta-2-1)(GABPB2-1)	ENSMUSG00000038766
79	24.0495	2329	0	Tbpl2	TATA box-binding protein-like protein 2 (TBP-like protein 2)(TATA box-binding protein-related factor 3)(TBP-related factor 3)	ENSMUSG00000061809
80	23.9901	2323	0	AC124537.5	RIKEN cDNA 4933417A18 gene (4933417A18Rik), mRNA	ENSMUSG00000021415
81	23.9745	4599	95	Atxn3	Ataxin-3 (EC 3.4.22.-)(Machado-Joseph disease protein 1 homolog)	ENSMUSG00000021189
82	23.447	6981	201	Farsa	Phenylalanyl-tRNA synthetase alpha chain (EC 6.1.1.20)(Phenylalanine--tRNA ligase alpha chain)(PheRS)	ENSMUSG00000003808
83	23.3566	2913	28	Zbtb43	Zinc finger and BTB domain-containing protein 43 (Zinc finger protein 297B)	ENSMUSG00000026788
84	23.2079	2244	0	Calcoco2	Calcium-binding and coiled-coil domain-containing protein 2 (Nuclear domain 10 protein NDP52)(Nuclear domain 10 protein 52)	ENSMUSG00000006056
85	23.1241	6051	165	Trappc5	Trafficking protein particle complex subunit 5	ENSMUSG00000040236
86	22.7981	2271	3	Bat2d	BAT2 domain-containing protein 1	ENSMUSG00000040225
87	22.5017	19994	792	Tram1	Translocation-associated membrane protein 1	ENSMUSG00000025935
88	22.4254	40176	1695	Dci	3,2-trans-enoyl-CoA isomerase, mitochondrial Precursor (EC 5.3.3.8)(Dodecenoyl-CoA isomerase)(Delta(3),Delta(2)-enoyl-CoA isomerase)(D3,D2-enoyl-CoA isomerase)	ENSMUSG00000024132
89	21.9037	2857	34	Pafah1b3	Platelet-activating factor acetylhydrolase IB subunit gamma (EC 3.1.1.47)(PAF acetylhydrolase 29 kDa subunit)(PAF-AH 29 kDa subunit)(PAF-AH subunit gamma)(PAFAH subunit gamma)	ENSMUSG00000005447
90	21.8889	2461	16	Nr4a2	Nuclear receptor subfamily 4 group A member 2 (Orphan nuclear receptor NURR1)(NUR-related factor 1)	ENSMUSG00000026826
91	21.8319	2498	18	Dclre1c	Protein artemis (mArt)(EC 3.1.-.-)(DNA cross-link repair 1C protein)(SNM1-like protein)	ENSMUSG00000026648
92	21.7909	2297	9	Emb	Embigin Precursor (Teratocarcinoma glycoprotein Gp-70)	ENSMUSG00000021728
93	21.6814	2350	12	Impad1	Inositol monophosphatase 3 (EC 3.1.3.25)(Inositol-1(or 4)-monophosphatase 3)(IMPase 3)(IMP 3)(Myo-inositol monophosphatase A3)(Inositol monophosphatase domain-containing protein 1)	ENSMUSG00000066324
94	21.2222	2192	7	C5ar1	C5a anaphylatoxin chemotactic receptor (C5a-R)(C5aR)(CD88 antigen)	ENSMUSG00000049130
95	21.2072	2254	10	Echdc2	Enoyl-CoA hydratase domain-containing protein 2, mitochondrial Precursor	ENSMUSG00000028601
96	21.0395	3624	76	Pros1	Vitamin K-dependent protein S Precursor	ENSMUSG00000022912
97	20.7723	1998	0	Cyp2j6	Cytochrome P450 2J6 (EC 1.14.14.1)(CYPIIJ6)(Arachidonic acid epoxygenase)	ENSMUSG00000052914
98	20.6438	2914	45	Aldh2	Aldehyde dehydrogenase, mitochondrial Precursor (EC 1.2.1.3)(ALDH class 2)(AHD-M1)(ALDHI)(ALDH-E2)	ENSMUSG00000029455
99	20.1402	7513	277	Gstm5	Glutathione S-transferase Mu 5 (EC 2.5.1.18)(GST class-mu 5)(Fibrous sheath component 2)(Fsc2)	ENSMUSG00000004032
100	20.099	1930	0	Plxnb3	Plexin-B3 Precursor (Plexin-6)	ENSMUSG00000031385
101	19.9901	1919	0	Pbp2	Phosphatidylethanolamine-binding protein 2 (PEBP-2)	ENSMUSG00000047104
102	19.7391	2624	37	Rhoj	Rho-related GTP-binding protein RhoJ Precursor (Tc10-like GTP-binding protein TCL)	ENSMUSG00000046768
103	19.5702	4636	141	Slc25a4	ADP/ATP translocase 1 (Adenine nucleotide translocator 1)(ANT 1)(ADP,ATP carrier protein 1)(Solute carrier family 25 member 4)(ADP,ATP carrier protein, heart/skeletal muscle isoform T1)(mANC1)	ENSMUSG00000031633
104	19.4716	5391	181	Sepx1	Methionine-R-sulfoxide reductase B1 (EC 1.8.4.-)(Selenoprotein X)(SelX)(Selenoprotein R)(SelR)	ENSMUSG00000075705
105	19.4622	2216	18	Aim1	absent in melanoma 1	ENSMUSG00000019866
106	19.4404	3652	92	Hipk2	Homeodomain-interacting protein kinase 2 (EC 2.7.11.1)(Nuclear body-associated kinase 1)(Sialophorin tail-associated nuclear serine/threonine-protein kinase)	ENSMUSG00000061436
107	19.4281	5573	191	Cpt1a	Carnitine O-palmitoyltransferase 1, liver isoform (CPT1-L)(EC 2.3.1.21)(Carnitine O-palmitoyltransferase I, liver isoform)(CPTI-L)(CPT I)(Carnitine palmitoyltransferase 1A)	ENSMUSG00000024900
108	19.301	1888	2	Ctsb	Cathepsin B Precursor (EC 3.4.22.1)(Cathepsin B1)	ENSMUSG00000021939
109	19.1782	1837	0	Klhl24	Kelch-like protein 24 (Kainate receptor-interacting protein for GluR6)(KRIP6)	ENSMUSG00000062901
110	19.1405	5623	198	Bphl	Valacyclovir hydrolase Precursor (VACVase)(EC 3.1.-.-)(Biphenyl hydrolase-like protein)	ENSMUSG00000038286
111	19.0882	3145	69	1110034A24Rik	Protein kintoun	ENSMUSG00000020973
112	18.952	6211	232	Igfbp1	Insulin-like growth factor-binding protein 1 Precursor (IGF-binding protein 1)(IGFBP-1)(IBP-1)	ENSMUSG00000020429
113	18.6765	1805	1	Nptxr	Chromobox protein homolog 6	ENSMUSG00000022421
114	18.6116	2152	20	Tspan18	Tetraspanin-18 (Tspan-18)	ENSMUSG00000027217
115	18.548	3183	76	Spopl	Speckle-type POZ protein-like (HIB homolog 2)	ENSMUSG00000026771
116	18.5307	3217	78	Rbm25	RNA binding motif protein 25	ENSMUSG00000010608
117	18.5074	2417	35	Ppp1r1a	Protein phosphatase 1 regulatory subunit 1A (Protein phosphatase inhibitor 1)(IPP-1)(I-1)	ENSMUSG00000022490
118	18.356	4489	149	Ppp2r1a	Serine/threonine-protein phosphatase 2A 65 kDa regulatory subunit A alpha isoform (PP2A, subunit A, PR65-alpha isoform)(PP2A, subunit A, R1-alpha isoform)	ENSMUSG00000007564
119	18.2911	2790	57	Cmpk1	UMP-CMP kinase (EC 2.7.4.14)(Cytidylate kinase)(Deoxycytidylate kinase)(Cytidine monophosphate kinase)(Uridine monophosphate kinase)(Uridine monophosphate/cytidine monophosphate kinase)(UMP/CMP kinase)(UMP/CMPK)	ENSMUSG00000028719
120	18.1557	2115	21	Dio1	Type I iodothyronine deiodinase (EC 1.97.1.10)(Type-I 5'-deiodinase)(Type 1 DI)(DIOI)(5DI)	ENSMUSG00000034785
121	18.0748	1834	6	Aipl1	Aryl-hydrocarbon-interacting protein-like 1	ENSMUSG00000040554
122	18.0077	11659	552	Acsm5	Acyl-coenzyme A synthetase ACSM5, mitochondrial Precursor (EC 6.2.1.2)	ENSMUSG00000030972
123	17.6389	1805	7	C3ar1	C3a anaphylatoxin chemotactic receptor (C3a-R)(C3AR)(Complement component 3a receptor 1)	ENSMUSG00000040552
124	17.1818	1790	9	Spg21	Maspardin (Spastic paraplegia 21 autosomal recessive Mast syndrome protein homolog)(Acid cluster protein 33)	ENSMUSG00000032388
125	17.0609	1862	14	Trpm2	Transient receptor potential cation channel subfamily M member 2 (EC 3.6.1.13)(Long transient receptor potential channel 2)(LTrpC-2)(LTrpC2)(Transient receptor potential channel 7)(TrpC7)	ENSMUSG00000009292
126	16.9484	2527	54	Nek1	Serine/threonine-protein kinase Nek1 (EC 2.7.11.1)(NimA-related protein kinase 1)	ENSMUSG00000031644
127	16.8696	2616	60	Acss3	Acyl-CoA synthetase short-chain family member 3, mitochondrial Precursor (EC 6.2.1.1)	ENSMUSG00000035948
128	16.7679	1778	11	Ctnnd1	Catenin delta-1 (p120 catenin)(p120(ctn))(Cadherin-associated Src substrate)(CAS)(p120(cas))	ENSMUSG00000034101
129	16.767	1627	2	Ebpl	Emopamil-binding protein-like (Emopamil-binding-related protein)	ENSMUSG00000021928
130	16.7633	9036	444	Th1l	Negative elongation factor D (NELF-D)(TH1-like protein)	ENSMUSG00000016253
131	16.5876	3118	93	Eif4ebp2	Eukaryotic translation initiation factor 4E-binding protein 2 (eIF4E-binding protein 2)(4E-BP2)(Phosphorylated heat- and acid-stable protein regulated by insulin 2)(PHAS-II)	ENSMUSG00000020091
132	16.5294	1586	1	Rpn1	Dolichyl-diphosphooligosaccharide--protein glycosyltransferase subunit 1 Precursor (EC 2.4.1.119)(Dolichyl-diphosphooligosaccharide--protein glycosyltransferase 67 kDa subunit)(Ribophorin-1)(Ribophorin I)(RPN-I)	ENSMUSG00000030062
133	16.4397	2218	40	Txnl4a	Thioredoxin-like protein 4A (Thioredoxin-like U5 snRNP protein U5-15kD)(Spliceosomal U5 snRNP-specific 15 kDa protein)(DIM1 protein homolog)	ENSMUSG00000057130
134	16.3496	1911	22	Foxo4	Forkhead box protein O4 (Fork head domain transcription factor AFX1)(Afxh)	ENSMUSG00000042903
135	16.3123	4027	152	Myo1e	myosin IE	ENSMUSG00000032220
136	16.2987	4920	207	Nudt2	Bis(5'-nucleosyl)-tetraphosphatase	ENSMUSG00000028443
137	16.2148	119403	7269	Hp	Haptoglobin Precursor	ENSMUSG00000031722
138	16.0902	1863	21	Nr1h5	nuclear receptor subfamily 1, group H, member 5 isoform 1	ENSMUSG00000048938
139	15.8039	1512	1	Hspa1l	Heat shock 70 kDa protein 1L (Heat shock 70 kDa protein 1-like)(Heat shock 70 kDa-like protein 1)(Spermatid-specific heat shock protein 70)	ENSMUSG00000007033
140	15.7545	1633	9	Pigy	Protein preY, mitochondrial Precursor	ENSMUSG00000043162
141	15.696	1862	24	Reep5	Receptor expression-enhancing protein 5 (Polyposis locus protein 1 homolog)(TB2 protein homolog)(GP106)	ENSMUSG00000005873
142	15.6198	1790	20	Zbtb4	zinc finger and BTB domain containing 4	ENSMUSG00000018750
143	15.6147	1602	8	Tkt	Transketolase (TK)(EC 2.2.1.1)(P68)	ENSMUSG00000021957
144	15.4452	2155	45	Mmp24	Matrix metalloproteinase-24 Precursor (MMP-24)(EC 3.4.24.-)(Membrane-type matrix metalloproteinase 5)(MT-MMP 5)(Membrane-type-5 matrix metalloproteinase)(MT5-MMP)(MMP-21)	ENSMUSG00000027612
145	15.3716	2713	82	Ube2d2	Ubiquitin-conjugating enzyme E2 D2 (EC 6.3.2.19)(Ubiquitin-protein ligase D2)(Ubiquitin carrier protein D2)(Ubiquitin-conjugating enzyme E2-17 kDa 2)(E2(17)KB 2)	ENSMUSG00000037096
146	15.3333	1602	10	Cst6	cystatin E/M	ENSMUSG00000024846
147	15.2975	1751	20	Mgea5	Bifunctional protein NCOAT (Nuclear cytoplasmic O-GlcNAcase and acetyltransferase)(Meningioma-expressed antigen 5)	ENSMUSG00000025220
148	15.2707	2664	80	Tspan13	Tetraspanin-13 (Tspan-13)(Transmembrane 4 superfamily member 13)	ENSMUSG00000020577
149	15.2444	7385	390	Entpd5	Ectonucleoside triphosphate diphosphohydrolase 5 Precursor (NTPDase 5)(EC 3.6.1.6)(Nucleoside diphosphatase)(CD39 antigen-like 4)(ER-UDPase)	ENSMUSG00000021236
150	15.223	10754	612	Acat1	Acetyl-CoA acetyltransferase, mitochondrial Precursor (EC 2.3.1.9)(Acetoacetyl-CoA thiolase)	ENSMUSG00000032047
151	15.2174	1650	14	Coro2b	Coronin-2B	ENSMUSG00000041729
152	15.0876	3687	150	Atp5e	ATP synthase subunit epsilon, mitochondrial	ENSMUSG00000016252
153	15.0261	28134	1778	Prdx1	Peroxiredoxin-1 (EC 1.11.1.15)(Thioredoxin peroxidase 2)(Thioredoxin-dependent peroxide reductase 2)(Osteoblast-specific factor 3)(OSF-3)(Macrophage 23 kDa stress protein)	ENSMUSG00000028691
154	14.8378	1547	10	Fdft1	Squalene synthetase (SQS)(SS)(EC 2.5.1.21)(Farnesyl-diphosphate farnesyltransferase)(FPP	ENSMUSG00000021273
155	14.7719	1584	13	Mrp63	Ribosomal protein 63, mitochondrial (mMRP63)	ENSMUSG00000021967
156	14.75	1847	31	Ankrd42	Ankyrin repeat domain-containing protein 42	ENSMUSG00000041343
157	14.7054	8635	493	Ebag9	Receptor-binding cancer antigen expressed on SiSo cells (Cancer-associated surface antigen RCAS1)(Estrogen receptor-binding fragment-associated gene 9 protein)	ENSMUSG00000022339
158	14.6507	2962	108	Il6st	Interleukin-6 receptor subunit beta Precursor (IL-6R-beta)(Interleukin-6 signal transducer)(Membrane glycoprotein 130)(gp130)(Oncostatin-M receptor alpha subunit)(CD130 antigen)	ENSMUSG00000021756
159	14.6423	1906	36	Sat2	Diamine acetyltransferase 2 (EC 2.3.1.57)(Spermidine/spermine N(1)-acetyltransferase 2)(Polyamine N-acetyltransferase 2)	ENSMUSG00000069835
160	14.5876	13977	864	Rpl4	60S ribosomal protein L4	ENSMUSG00000032399
161	14.5461	6373	344	Por	NADPH--cytochrome P450 reductase (CPR)(P450R)(EC 1.6.2.4)	ENSMUSG00000005514
162	14.5322	2385	70	Maf	Transcription factor Maf (Proto-oncogene c-maf)(C-Maf)(V-maf musculoaponeurotic fibrosarcoma oncogene homolog)	ENSMUSG00000055435
163	14.3796	1453	7	Pla1a	Phospholipase A1 member A Precursor (EC 3.1.1.-)(Phosphatidylserine-specific phospholipase A1)(PS-PLA1)	ENSMUSG00000002847
164	14.3529	4048	188	Sdsl	Serine dehydratase-like (EC 4.3.1.-)	ENSMUSG00000029596
165	14.2871	1343	0	Guca2b	Guanylate cyclase activator 2B Precursor	ENSMUSG00000032978
166	14.275	1613	19	Eme1	Crossover junction endonuclease EME1 (EC 3.1.22.-)	ENSMUSG00000039055
167	14.2475	1339	0	Trim67	Tripartite motif-containing protein 67	ENSMUSG00000036913
168	14.2277	1337	0	Map3k13	Mitogen-activated protein kinase kinase kinase 13 (EC 2.7.11.25)	ENSMUSG00000033618
169	14.1863	1347	1	Eif5b	Eukaryotic translation initiation factor 5B (eIF-5B)(Translation initiation factor IF-2)	ENSMUSG00000026083
170	14.1439	1767	31	Tmem170	Transmembrane protein 170A	ENSMUSG00000031953
171	14.0997	4285	210	Tpp1	Tripeptidyl-peptidase 1 Precursor (TPP-1)(EC 3.4.14.9)(Tripeptidyl-peptidase I)(TPP-I)(Tripeptidyl aminopeptidase)(Lysosomal pepstatin-insensitive protease)(LPIC)	ENSMUSG00000030894
172	14.0652	16947	1111	Cd302	CD302 antigen Precursor (C-type lectin domain family 13 member A)(Type I transmembrane C-type lectin receptor DCL-1)(CD302 antigen)	ENSMUSG00000060703
173	13.9664	3643	167	Nat10	N-acetyltransferase 10 (EC 2.3.1.-)	ENSMUSG00000027185
174	13.9601	6196	350	Lrpprc	Leucine-rich PPR motif-containing protein, mitochondrial Precursor (130 kDa leucine-rich protein)(LRP 130)(mLRP130)	ENSMUSG00000024120
175	13.9175	2600	93	Exosc4	Exosome complex exonuclease RRP41 (EC 3.1.13.-)(Ribosomal RNA-processing protein 41)(Exosome component 4)	ENSMUSG00000034259
176	13.7099	1696	30	Atox1	Copper transport protein ATOX1 (Metal transport protein ATX1)	ENSMUSG00000018585
177	13.7033	4011	199	Slc35b3	Adenosine 3'-phospho 5'-phosphosulfate transporter 2 (PAPS transporter 2)(Solute carrier family 35 member B3)	ENSMUSG00000021432
178	13.6852	1378	7	Sorl1	Sortilin-related receptor Precursor (Sorting protein-related receptor containing LDLR class A repeats)(mSorLA)(SorLA-1)(Low-density lipoprotein receptor relative with 11 ligand-binding repeats)(LDLR relative with 11 ligand-binding repeats)(LR11)(Gp250)	ENSMUSG00000049313
179	13.5686	1284	1	Skint4	Selection and upkeep of intraepithelial T-cells protein 4 Precursor (Skint-4)	ENSMUSG00000055960
180	13.563	1514	18	Igk-C	Immunoglobulin Kappa light chain C gene segment	ENSMUSG00000076609
181	13.5604	3602	172	Abcc9	ATP-binding cassette transporter sub-family C member 9 (Sulfonylurea receptor 2)	ENSMUSG00000030249
182	13.4356	1257	0	Cldnd2	Claudin domain-containing protein 2	ENSMUSG00000038973
183	13.3886	18296	1273	Rpl9	60S ribosomal protein L9	ENSMUSG00000047215
184	13.0594	1219	0	Olfr1020	Olfactory receptor 1020 (Olfactory receptor 201-2)	ENSMUSG00000046975
185	13.0268	1359	11	Sestd1	SEC14 domain and spectrin repeat-containing protein 1 (Huntingtin-interacting protein-like protein)	ENSMUSG00000042272
186	12.9307	1206	0	Acbd7	Acyl-CoA-binding domain-containing protein 7	ENSMUSG00000026644
187	12.9038	2584	107	Nmt2	Glycylpeptide N-tetradecanoyltransferase 2 (EC 2.3.1.97)(Peptide N-myristoyltransferase 2)(Myristoyl-CoA	ENSMUSG00000026643
188	12.8447	1223	2	Vps13a	Vacuolar protein sorting-associated protein 13A (Chorein)(Chorea-acanthocytosis protein homolog)	ENSMUSG00000046230
189	12.8077	1565	29	Rac1	Ras-related C3 botulinum toxin substrate 1 Precursor (p21-Rac1)	ENSMUSG00000001847
190	12.783	1255	5	Rnf141	RING finger protein 141 (Zinc finger protein 230)	ENSMUSG00000030788
191	12.7542	11366	798	Gabarapl2	Gamma-aminobutyric acid receptor-associated protein-like 2 (GABA(A) receptor-associated protein-like 2)(Golgi-associated ATPase enhancer of 16 kDa)(GATE-16)	ENSMUSG00000031950
192	12.6765	1193	1	Sema7a	Semaphorin-7A Precursor (Semaphorin-L)(Sema L)(Semaphorin-K1)(Sema K1)(CD108 antigen)	ENSMUSG00000038264
193	12.6625	3952	219	Trp53inp1	Tumor protein p53-inducible nuclear protein 1 (p53-dependent damage-inducible nuclear protein 1)(p53DINP1)(Stress-induced protein)(Thymus-expressed acidic protein)(TEAP)	ENSMUSG00000028211
194	12.6474	1873	55	Cycs	Cytochrome c, somatic	ENSMUSG00000063694
195	12.6467	2012	66	Pja2	E3 ubiquitin-protein ligase Praja2 (Praja-2)(EC 6.3.2.-)(RING finger protein 131)	ENSMUSG00000024083
196	12.4814	10322	734	Hpn	Serine protease hepsin (EC 3.4.21.106)	ENSMUSG00000001249
197	12.4667	1209	4	Il4ra	Interleukin-4 receptor alpha chain Precursor (IL-4R-alpha)(CD124 antigen)	ENSMUSG00000030748
198	12.287	1313	14	AC104881.9	Probable ribosome biogenesis protein RLP24	ENSMUSG00000053740
199	12.2816	1165	2	Pfkfb4	6-phosphofructo-2-kinase/fructose-2,6-biphosphatase 4 (6PF-2-K/Fru-2,6-P2ASE testis-type isozyme)	ENSMUSG00000025648
200	12.25	1762	51	Itfg2	Integrin-alpha FG-GAP repeat-containing protein 2	ENSMUSG00000001518
201	12.2301	1282	12	Moap1	Modulator of apoptosis 1 (MAP-1)	ENSMUSG00000041716
202	12.1875	1850	59	Ccdc47	Coiled-coil domain-containing protein 47 Precursor (Adipocyte-specific protein 4)	ENSMUSG00000078622
203	12.1486	5379	350	Slc37a4	solute carrier family 37 (glucose-6-phosphate transporter), member 4	ENSMUSG00000032114
204	12.1468	1224	8	Ankrd52	Serine/threonine-protein phosphatase 6 regulatory ankyrin repeat subunit C (Serine/threonine-protein phosphatase 6 regulatory subunit ARS-C)(PP6-ARS-C)	ENSMUSG00000014498
205	12.1344	2157	85	Mmgt1	Membrane magnesium transporter 1 Precursor (Transmembrane protein 32)	ENSMUSG00000061273
206	11.9814	1829	60	Pcbp2	Poly(rC)-binding protein 2 (Alpha-CP2)(Putative heterogeneous nuclear ribonucleoprotein X)(hnRNP X)(CTBP)(CBP)	ENSMUSG00000056851
207	11.9358	3063	164	Maoa	Amine oxidase	ENSMUSG00000025037
208	11.8741	1503	34	Ifi30	interferon gamma inducible protein 30	ENSMUSG00000031838
209	11.8706	5954	409	Igfbp3	Insulin-like growth factor-binding protein 3 Precursor (IGF-binding protein 3)(IGFBP-3)(IBP-3)	ENSMUSG00000020427
210	11.8274	6819	484	Sec22b	Vesicle-trafficking protein SEC22b (SEC22 vesicle-trafficking protein homolog B)(SEC22 vesicle-trafficking protein-like 1)(mSec22b)(ERS24)(ERS-24)	ENSMUSG00000027879
211	11.8168	1448	30	Marco	Macrophage receptor MARCO (Macrophage receptor with collagenous structure)	ENSMUSG00000026390
212	11.6684	2082	86	Fasn	Fatty acid synthase (EC 2.3.1.85)	ENSMUSG00000025153
213	11.6376	1634	48	Ovca2	Ovarian cancer-associated gene 2 protein homolog	ENSMUSG00000038268
214	11.6046	2952	162	Gda	Guanine deaminase (Guanase)(Guanine aminase)(EC 3.5.4.3)(Guanine aminohydrolase)(GAH)	ENSMUSG00000058624
215	11.5822	8772	665	Ywhaz	14-3-3 protein zeta/delta (Protein kinase C inhibitor protein 1)(KCIP-1)(SEZ-2)	ENSMUSG00000022285
216	11.5	1303	21	Cerk	Ceramide kinase (mCERK)(EC 2.7.1.138)(Acylsphingosine kinase)	ENSMUSG00000035891
217	11.469	1196	12	Prdm2	retinoblastoma protein-binding zinc finger protein	ENSMUSG00000057637
218	11.4595	2444	121	Cbr4	Carbonyl reductase 4 (EC 1.1.1.-)	ENSMUSG00000031641
219	11.3491	2533	131	Cast	Calpastatin (Calpain inhibitor)	ENSMUSG00000021585
220	11.3358	1419	33	Ggct	Gamma-glutamylcyclotransferase (EC 2.3.2.4)	ENSMUSG00000002797
221	11.3293	3650	230	Arpc4	Actin-related protein 2/3 complex subunit 4 (Arp2/3 complex 20 kDa subunit)(p20-ARC)	ENSMUSG00000079426
222	11.3035	2172	100	100039744	Nidogen-1 Precursor (NID-1)(Entactin)	ENSMUSG00000005397
223	11.2254	1842	72	6330503K22Rik	Centrosomal protein of 110 kDa (Cep110)	ENSMUSG00000033904
224	11.1171	1134	10	2610101N10Rik	U2-associated protein SR140 (140 kDa Ser/Arg-rich domain protein)	ENSMUSG00000032407
225	11.1038	1077	5	Rpl36	60S ribosomal protein L36	ENSMUSG00000057863
226	11.0891	1020	0	Crim2	Cysteine-rich motor neuron 2 protein Precursor (CRIM-2)(Cysteine-rich BMP regulator 2)(Kielin/chordin-like protein 1)(KCP-1)(KCP)	ENSMUSG00000059022
227	11.0693	1018	0	Abhd1	Abhydrolase domain-containing protein 1 (EC 3.1.1.-)(Lung alpha/beta hydrolase 1)(MmLABH1)	ENSMUSG00000006638
228	11.0181	6004	453	Tmem37	Voltage-dependent calcium channel gamma-like subunit (Neuronal voltage-gated calcium channel gamma-like subunit)(Transmembrane protein 37)	ENSMUSG00000050777
229	10.9929	1439	39	N6amt2	N(6)-adenine-specific DNA methyltransferase 2 (EC 2.1.1.-)	ENSMUSG00000021951
230	10.9558	1138	12	Tmem45b	Transmembrane protein 45B	ENSMUSG00000041737
231	10.9547	2803	164	Fyttd1	Forty-two-three domain-containing protein 1 (Protein 40-2-3)	ENSMUSG00000022800
232	10.9545	1346	31	Ctps	CTP synthase 1 (EC 6.3.4.2)(UTP--ammonia ligase 1)(CTP synthetase 1)	ENSMUSG00000028633
233	10.9357	1770	70	Sf3b1	Splicing factor 3B subunit 1 (Pre-mRNA-splicing factor SF3b 155 kDa subunit)(SF3b155)(Spliceosome-associated protein 155)(SAP 155)	ENSMUSG00000025982
234	10.8598	1062	6	Agrn	Agrin Precursor	ENSMUSG00000041936
235	10.8598	1062	6	Npc2	Epididymal secretory protein E1 Precursor (mE1)(Niemann Pick type C2 protein homolog)	ENSMUSG00000021242
236	10.8536	3384	220	Ldha	L-lactate dehydrogenase A chain (LDH-A)(EC 1.1.1.27)(LDH muscle subunit)(LDH-M)	ENSMUSG00000063229
237	10.8235	1188	18	Capns1	Calpain small subunit 1 (CSS1)(Calcium-dependent protease small subunit 1)(Calcium-dependent protease small subunit)(CDPS)(Calpain regulatory subunit)(Calcium-activated neutral proteinase small subunit)(CANP small subunit)	ENSMUSG00000001794
238	10.8171	2680	156	Ilf2	Interleukin enhancer-binding factor 2 (Nuclear factor of activated T-cells 45 kDa)	ENSMUSG00000001016
239	10.8012	1747	70	Stam2	Signal transducing adapter molecule 2 (STAM-2)(Hrs-binding protein)	ENSMUSG00000055371
240	10.7154	1218	22	Ttc35	Tetratricopeptide repeat protein 35 (TPR repeat protein 35)	ENSMUSG00000022337
241	10.6944	1055	7	Gba	Glucosylceramidase Precursor (EC 3.2.1.45)(Beta-glucocerebrosidase)(Acid beta-glucosidase)(D-glucosyl-N-acylsphingosine glucohydrolase)	ENSMUSG00000028048
242	10.6644	35455	3233	Rps3a	40S ribosomal protein S3a	ENSMUSG00000028081
243	10.6535	976	0	Col9a2	Collagen alpha-2(IX) chain Precursor	ENSMUSG00000028626
244	10.5841	2292	125	Eral1	GTP-binding protein era homolog (ERA-W)(Conserved ERA-like GTPase)(CEGA)	ENSMUSG00000020832
245	10.5523	2823	176	Cav2	Caveolin-2	ENSMUSG00000000058
246	10.5489	5512	431	Hspb1	Heat shock protein beta-1 (HspB1)(Heat shock 27 kDa protein)(HSP 27)(Growth-related 25 kDa protein)(P25)(HSP25)	ENSMUSG00000004951
247	10.4811	1011	5	Rabl5	Rab-like protein 5	ENSMUSG00000007987
248	10.4805	17633	1591	Ak3	GTP	ENSMUSG00000024782
249	10.4459	18337	1664	Sc4mol	C-4 methylsterol oxidase (EC 1.14.13.72)(Methylsterol monooxygenase)	ENSMUSG00000031604
250	10.3961	6252	510	Nr1i3	Nuclear receptor subfamily 1 group I member 3 (Constitutive androstane receptor)(CAR)(Orphan nuclear receptor MB67)	ENSMUSG00000005677
251	10.3828	1229	27	Slc16a7	Monocarboxylate transporter 2 (MCT 2)(Solute carrier family 16 member 7)	ENSMUSG00000020102
252	10.3413	1203	25	Cndp2	Cytosolic non-specific dipeptidase (CNDP dipeptidase 2)(Glutamate carboxypeptidase-like protein 1)	ENSMUSG00000024644
253	10.3271	1005	6	Trib3	Tribbles homolog 3 (TRB-3)(Neuronal cell death-inducible putative kinase)	ENSMUSG00000032715
254	10.3254	1201	25	Acp1	Low molecular weight phosphotyrosine protein phosphatase (LMW-PTPase)(LMW-PTP)(EC 3.1.3.48)(Low molecular weight cytosolic acid phosphatase)(EC 3.1.3.2)	ENSMUSG00000044573
255	10.3176	1654	69	Acsm3	Acyl-coenzyme A synthetase ACSM3, mitochondrial Precursor (EC 6.2.1.2)(Acyl-CoA synthetase medium-chain family member 3)(Middle-chain acyl-CoA synthetase 3)(Butyryl coenzyme A synthetase 3)(Butyrate--CoA ligase 3)(Protein SA homolog)	ENSMUSG00000030935
256	10.2762	979	4	Cdc2l5	Cell division cycle 2-like protein kinase 5 (EC 2.7.11.22)(CDC2-related protein kinase 5)	ENSMUSG00000041297
257	10.2431	1754	80	5730427N09Rik	Ribosome biogenesis protein NSA2 homolog (TGF-beta-inducible nuclear protein 1)(L-name-related protein 42)(LNR42)	ENSMUSG00000060739
258	10.2117	1299	36	Acly	ATP-citrate synthase (EC 2.3.3.8)(ATP-citrate (pro-S-)-lyase)(Citrate cleavage enzyme)	ENSMUSG00000020917
259	10.1382	1147	22	4930572J05Rik	UPF0670 protein C8orf55 homolog Precursor	ENSMUSG00000056665
260	10.1364	1015	9	Ostb	Organic solute transporter subunit beta (OST-beta)	ENSMUSG00000053862
261	10.0965	5443	448	F11r	Junctional adhesion molecule A Precursor (JAM-A)(Junctional adhesion molecule 1)(JAM-1)(CD321 antigen)	ENSMUSG00000038235
262	10.0936	1626	70	Cdc5l	Cell division cycle 5-related protein (Cdc5-like protein)	ENSMUSG00000023932
263	10.0848	3823	288	Klf9	Krueppel-like factor 9 (Transcription factor BTEB1)(Basic transcription element-binding protein 1)(BTE-binding protein 1)(GC-box-binding protein 1)	ENSMUSG00000033863
264	10.0686	927	1	Kcnj15	ATP-sensitive inward rectifier potassium channel 15 (Potassium channel, inwardly rectifying subfamily J member 15)(Inward rectifier K(+) channel Kir4.2)	ENSMUSG00000062609
265	10.0545	1006	9	Nfatc2	Nuclear factor of activated T-cells, cytoplasmic 2 (T-cell transcription factor NFAT1)(NFAT pre-existing subunit)(NF-ATp)	ENSMUSG00000027544
266	10.0484	1769	85	Thoc3	THO complex subunit 3 (Tho3)	ENSMUSG00000025872
267	10.0108	2683	177	Eng	Endoglin Precursor (Cell surface MJ7/18 antigen)(CD105 antigen)	ENSMUSG00000026814
268	10.0056	1691	78	Tnrc6b	trinucleotide repeat containing 6b isoform 1	ENSMUSG00000047888
269	9.94231	934	3	Phgdh	D-3-phosphoglycerate dehydrogenase (3-PGDH)(EC 1.1.1.95)(A10)	ENSMUSG00000053398
270	9.93519	973	7	Xpo7	Exportin-7 (Exp7)(Ran-binding protein 16)	ENSMUSG00000022100
271	9.89091	988	9	Spag1	Sperm-associated antigen 1 (Infertility-related sperm protein Spag-1)(TPR-containing protein involved in spermatogenesis)(TPIS)	ENSMUSG00000037617
272	9.82301	1010	12	Cdipt	CDP-diacylglycerol--inositol 3-phosphatidyltransferase (EC 2.7.8.11)(Phosphatidylinositol synthase)(PtdIns synthase)(PI synthase)	ENSMUSG00000030682
273	9.78151	1064	18	Vps13c	Vacuolar protein sorting-associated protein 13C	ENSMUSG00000035284
274	9.70922	1269	40	Acsm2	Acyl-coenzyme A synthetase ACSM2, mitochondrial Precursor (EC 6.2.1.2)(Acyl-CoA synthetase medium-chain family member 2)(Middle-chain acyl-CoA synthetase 2)(Butyryl coenzyme A synthetase 2)(Butyrate--CoA ligase 2)	ENSMUSG00000030945
275	9.67476	1893	105	Tspan3	Tetraspanin-3 (Tspan-3)(Transmembrane 4 superfamily member 8)(Tetraspanin TM4-A)(OSP-associated protein 1)(OAP-1)	ENSMUSG00000032324
276	9.66667	1176	31	Fermt3	Fermitin family homolog 3 (Unc-112-related protein 2)(Kindlin-3)	ENSMUSG00000024965
277	9.65833	1059	19	Polr2l	DNA-directed RNA polymerases I, II, and III subunit RPABC5 (RNA polymerases I, II, and III subunit ABC5)(DNA-directed RNA polymerase III subunit L)(RPB10)	ENSMUSG00000038489
278	9.65789	1001	13	Eif2ak4	Eukaryotic translation initiation factor 2-alpha kinase 4 (EC 2.7.11.1)(GCN2-like protein)(mGCN2)	ENSMUSG00000005102
279	9.64826	99663	10239	Apoc2	Apolipoprotein C-II Precursor (Apo-CII)(ApoC-II)	ENSMUSG00000002992
280	9.57895	1720	89	Aldh1l1	10-formyltetrahydrofolate dehydrogenase (10-FTHFDH)(EC 1.5.1.6)(Aldehyde dehydrogenase family 1 member L1)	ENSMUSG00000030088
281	9.57851	1059	20	Klhl4	kelch-like 4	ENSMUSG00000025597
282	9.57386	1585	75	Rusc1	RUN and SH3 domain-containing protein 1	ENSMUSG00000041263
283	9.56383	1698	87	Mcee	Methylmalonyl-CoA epimerase, mitochondrial Precursor (EC 5.1.99.1)(DL-methylmalonyl-CoA racemase)	ENSMUSG00000033429
284	9.53846	1264	42	Irf7	Interferon regulatory factor 7 (IRF-7)	ENSMUSG00000025498
285	9.51818	947	9	Taf12	Transcription initiation factor TFIID subunit 12 (Transcription initiation factor TFIID 20 kDa subunits)(TAFII-20)(TAFII20)	ENSMUSG00000028899
286	9.50923	2477	170	Nfia	Nuclear factor 1 A-type (Nuclear factor 1/A)(NF1-A)(NFI-A)(NF-I/A)(CCAAT-box-binding transcription factor)(CTF)(TGGCA-binding protein)	ENSMUSG00000028565
287	9.48837	1124	28	Tnfrsf1b	Tumor necrosis factor receptor superfamily member 1B Precursor (Tumor necrosis factor receptor 2)(TNF-R2)(Tumor necrosis factor receptor type II)(p75)(p80 TNF-alpha receptor)(CD120b antigen)	ENSMUSG00000028599
288	9.45038	1138	30	1600014K23Rik	Synaptic glycoprotein SC2 (EC 1.3.1.-)(Trans-2,3-enoyl-CoA reductase)(TER)	ENSMUSG00000031708
289	9.41667	1143	31	Notch2	Neurogenic locus notch homolog protein 2 Precursor (Notch 2)(Motch B)	ENSMUSG00000027878
290	9.37255	856	1	Kdelr3	ER lumen protein retaining receptor 3 (KDEL endoplasmic reticulum protein retention receptor 3)(KDEL receptor 3)	ENSMUSG00000010830
291	9.368	1071	24	Pgrmc2	Membrane-associated progesterone receptor component 2	ENSMUSG00000049940
292	9.31383	3402	275	Drap1	Dr1-associated corepressor (Dr1-associated protein 1)(Negative co-factor 2-alpha)(NC2-alpha)	ENSMUSG00000024914
293	9.29808	867	3	Mgst2	microsomal glutathione S-transferase 2	ENSMUSG00000074604
294	9.29018	1981	123	Sepsecs	O-phosphoseryl-tRNA(Sec) selenium transferase (EC 2.9.1.n1)(Selenocysteine synthase)(Sec synthase)(Selenocysteinyl-tRNA(Sec) synthase)(Sep-tRNA	ENSMUSG00000029173
295	9.2623	1030	21	Ankrd12	ankyrin repeat domain 12	ENSMUSG00000034647
296	9.25	1047	23	Tbl1xr1	F-box-like/WD repeat-containing protein TBL1XR1 (Transducin beta-like 1X-related protein 1)(Nuclear receptor corepressor/HDAC3 complex subunit TBLR1)(TBL1-related protein 1)	ENSMUSG00000027630
297	9.18705	1177	38	Commd8	COMM domain-containing protein 8	ENSMUSG00000029213
298	9.18049	1782	104	Ube2n	Ubiquitin-conjugating enzyme E2 N (EC 6.3.2.19)(Ubiquitin-protein ligase N)(Ubiquitin carrier protein N)(Ubc13)(Bendless-like ubiquitin-conjugating enzyme)	ENSMUSG00000074781
299	9.14831	2059	135	Golga4	Golgin subfamily A member 4 (tGolgin-1)	ENSMUSG00000038708
300	9.13274	932	12	Abca2	ATP-binding cassette sub-family A member 2 (ATP-binding cassette transporter 2)(ATP-binding cassette 2)	ENSMUSG00000026944
301	9.03125	1345	59	Laptm4b	Lysosomal-associated transmembrane protein 4B	ENSMUSG00000022257
302	9.02778	875	7	4922501C03Rik	Protein QN1 homolog	ENSMUSG00000056919
303	8.9823	915	12	Rnpepl1	arginyl aminopeptidase (aminopeptidase B)-like 1	ENSMUSG00000026269
304	8.93967	4790	446	Ddx6	Probable ATP-dependent RNA helicase DDX6 (EC 3.6.1.-)(DEAD box protein 6)(ATP-dependent RNA helicase p54)(Oncogene RCK homolog)	ENSMUSG00000032097
305	8.93798	1053	28	Il33	Interleukin-33 Precursor (IL-33)	ENSMUSG00000024810
306	8.91667	970	19	BC020002	WD repeat-containing protein mio	ENSMUSG00000042447
307	8.9127	1023	25	Aifm2	Apoptosis-inducing factor 2 (EC 1.-.-.-)(Apoptosis-inducing factor-like mitochondrion-associated inducer of death)(Apoptosis-inducing factor homologous mitochondrion-associated inducer of death)	ENSMUSG00000020085
308	8.86667	831	4	C330002I19Rik	kinase D-interacting substrate 220	ENSMUSG00000036333
309	8.83493	4503	420	Carhsp1	Calcium-regulated heat stable protein 1 (Calcium-regulated heat-stable protein of 24 kDa)(CRHSP-24)	ENSMUSG00000008393
310	8.82014	1126	38	Elof1	Transcription elongation factor 1 homolog	ENSMUSG00000013822
311	8.81651	861	8	Lrp2	Low-density lipoprotein receptor-related protein 2 Precursor (Megalin)(Glycoprotein 330)(gp330)	ENSMUSG00000027070
312	8.80909	869	9	Epha7	Ephrin type-A receptor 7 Precursor (EC 2.7.10.1)(Tyrosine-protein kinase receptor EHK-3)(EPH homology kinase 3)(Embryonic brain kinase)(EBK)(Developmental kinase 1)(MDK-1)	ENSMUSG00000028289
313	8.78302	831	5	Dnajc27	DnaJ homolog subfamily C member 27 (Rab and DnaJ domain-containing protein)	ENSMUSG00000020657
314	8.76056	1144	41	Wdr43	WD repeat-containing protein 43	ENSMUSG00000041057
315	8.70501	2851	238	Slc44a1	Choline transporter-like protein 1 (Solute carrier family 44 member 1)(CD92 antigen)	ENSMUSG00000028412
316	8.7	1118	39	Chd1	Chromodomain-helicase-DNA-binding protein 1 (CHD-1)(EC 3.6.1.-)(ATP-dependent helicase CHD1)	ENSMUSG00000023852
317	8.69697	4205	394	Sfrs1	Splicing factor, arginine/serine-rich 1 (ASF/SF2)	ENSMUSG00000018379
318	8.63717	876	12	Klhl13	Kelch-like protein 13 (BTB and kelch domain-containing protein 2)	ENSMUSG00000036782
319	8.62963	1065	34	Rab22a	Ras-related protein Rab-22A (Rab-22)(Rab-14)	ENSMUSG00000027519
320	8.625	1073	35	Pet112l	Probable glutamyl-tRNA(Gln) amidotransferase subunit B, mitochondrial Precursor (Glu-ADT subunit B)(EC 6.3.5.-)(Cytochrome oxidase assembly factor PET112 homolog)	ENSMUSG00000028085
321	8.61224	3698	340	Dstn	Destrin (Actin-depolymerizing factor)(ADF)(Sid 23)	ENSMUSG00000015932
322	8.60784	778	1	5730494M16Rik	Tubulin polyglutamylase complex subunit 2 (PGs2)	ENSMUSG00000024269
323	8.6	803	4	Gdpd1	Glycerophosphodiester phosphodiesterase domain-containing protein 1 (EC 3.1.-.-)(Glycerophosphodiester phosphodiesterase 4)	ENSMUSG00000061666
324	8.5873	1523	88	Rad17	Cell cycle checkpoint protein RAD17	ENSMUSG00000021635
325	8.55556	1440	79	Dmd	Dystrophin	ENSMUSG00000045103
326	8.54717	806	5	Csrnp3	Cysteine/serine-rich nuclear protein 3 (CSRNP-3)(TGF-beta-induced apoptosis protein 2)(TAIP-2)(Protein FAM130A2)	ENSMUSG00000044647
327	8.48739	910	18	Kif7	Motor domain of KIF7 Fragment	ENSMUSG00000050382
328	8.45894	19161	2176	Hsd17b10	3-hydroxyacyl-CoA dehydrogenase type-2 (EC 1.1.1.35)(3-hydroxyacyl-CoA dehydrogenase type II)(Type II HADH)(3-hydroxy-2-methylbutyryl-CoA dehydrogenase)(EC 1.1.1.178)(17-beta-hydroxysteroid dehydrogenase 10)(Mitochondrial ribonuclease P protein 2)(Mitochondrial RNase P protein 2)(Endoplasmic reticulum-associated amyloid beta-peptide-binding protein)	ENSMUSG00000025260
329	8.42857	1670	109	Yipf6	Protein YIPF6 (YIP1 family member 6)	ENSMUSG00000047694
330	8.39744	1210	55	Ormdl3	ORM1-like protein 3	ENSMUSG00000038150
331	8.37383	796	6	Pgbd1	PiggyBac transposable element derived 1	ENSMUSG00000055313
332	8.33654	767	3	Cdkl1	Cyclin-dependent kinase-like 1 (EC 2.7.11.22)	ENSMUSG00000020990
333	8.32727	816	9	Chrnb1	Acetylcholine receptor subunit beta Precursor	ENSMUSG00000041189
334	8.27273	2175	174	Litaf	Lipopolysaccharide-induced tumor necrosis factor-alpha factor homolog (LPS-induced TNF-alpha factor homolog)(LITAF-like protein)(NEDD4 WW domain-binding protein 3)(Estrogen-enhanced transcript protein)(mEET)	ENSMUSG00000022500
335	8.27074	1794	128	Pdk4		ENSMUSG00000019577
336	8.26471	1024	35	Mapk12	Mitogen-activated protein kinase 12 (EC 2.7.11.24)(Extracellular signal-regulated kinase 6)(ERK-6)(Stress-activated protein kinase 3)(Mitogen-activated protein kinase p38 gamma)(MAP kinase p38 gamma)	ENSMUSG00000022610
337	8.25767	1246	62	Ids	Iduronate 2-sulfatase Precursor (EC 3.1.6.13)(Alpha-L-iduronate sulfate sulfatase)	ENSMUSG00000035847
338	8.2541	907	21	Rad18	E3 ubiquitin-protein ligase RAD18 (EC 6.3.2.-)(Postreplication repair protein RAD18)(mRAD18Sc)	ENSMUSG00000030254
339	8.2377	905	21	Atp2a2	Sarcoplasmic/endoplasmic reticulum calcium ATPase 2 (SERCA2)(EC 3.6.3.8)(Calcium pump 2)(Calcium-transporting ATPase sarcoplasmic reticulum type, slow twitch skeletal muscle isoform)(SR Ca(2+)-ATPase 2)(Endoplasmic reticulum class 1/2 Ca(2+) ATPase)	ENSMUSG00000029467
340	8.21488	1888	141	Etfdh	Electron transfer flavoprotein-ubiquinone oxidoreductase, mitochondrial Precursor (ETF-ubiquinone oxidoreductase)(ETF-QO)(EC 1.5.5.1)(Electron-transferring-flavoprotein dehydrogenase)(ETF dehydrogenase)	ENSMUSG00000027809
341	8.20808	3963	394	Dnajb9	DnaJ homolog subfamily B member 9 (mDJ7)	ENSMUSG00000014905
342	8.2	1458	89	Atp5g1	ATP synthase lipid-binding protein, mitochondrial Precursor (ATP synthase proteolipid P1)(ATPase protein 9)(ATPase subunit c)	ENSMUSG00000006057
343	8.19734	3597	350	Erp29	Endoplasmic reticulum protein ERp29 Precursor	ENSMUSG00000029616
344	8.19608	736	1	Rgs2	Regulator of G-protein signaling 2 (RGS2)	ENSMUSG00000026360
345	8.15385	1172	55	Mrpl1	39S ribosomal protein L1, mitochondrial Precursor (L1mt)(MRP-L1)	ENSMUSG00000029486
346	8.10502	1675	118	Pds5a	Sister chromatid cohesion protein PDS5 homolog A	ENSMUSG00000029202
347	8.09091	790	9	Hebp2	Heme-binding protein 2 (Protein SOUL)	ENSMUSG00000019853
348	8.07807	2073	168	Btf3l4	Transcription factor BTF3 homolog 4 (Basic transcription factor 3-like 4)	ENSMUSG00000028568
349	8.06542	763	6	Vnn1	Pantetheinase Precursor (EC 3.5.1.92)(Pantetheine hydrolase)(Vascular non-inflammatory molecule 1)(Vanin-1)	ENSMUSG00000037440
350	8.02395	1240	66	Vamp2	Vesicle-associated membrane protein 2 (VAMP-2)(Synaptobrevin-2)	ENSMUSG00000020894
351	8.01923	734	3	Lep	Leptin Precursor (Obesity factor)	ENSMUSG00000059201
352	8.006	3903	399	Rbm14	RNA-binding protein 14 (RNA-binding motif protein 14)	ENSMUSG00000006456
353	7.99153	843	17	Serinc5	Serine incorporator 5 (Axotomy-induced glycoprotein 3)(AIGP-3)	ENSMUSG00000021703
354	7.97203	1040	42	Dpp8	Dipeptidyl peptidase 8 (EC 3.4.14.5)(Dipeptidyl peptidase VIII)(DP8)	ENSMUSG00000032393
355	7.96947	944	30	Tmem63a	Transmembrane protein 63A	ENSMUSG00000026519
356	7.96809	1398	87	Mrpl37	39S ribosomal protein L37, mitochondrial Precursor (L37mt)(MRP-L37)	ENSMUSG00000028622
357	7.95098	711	1	Dhx29	ATP-dependent RNA helicase Dhx29 (EC 3.6.1.-)(DEAH box protein 29)	ENSMUSG00000042426
358	7.93197	1066	46	Sephs2	Selenide, water dikinase 2 (EC 2.7.9.3)(Selenophosphate synthetase 2)(Selenium donor protein 2)	ENSMUSG00000049091
359	7.91667	945	31	Fubp1	Far upstream element-binding protein 1 (FUSE-binding protein 1)(FBP)	ENSMUSG00000028034
360	7.91176	707	1	Hist2h2ab	Histone H2A type 2-B (H2a-613A)	ENSMUSG00000063689
361	7.90741	754	7	Ckmt1	Creatine kinase, ubiquitous mitochondrial Precursor (EC 2.7.3.2)(U-MtCK)(Acidic-type mitochondrial creatine kinase)(Mia-CK)	ENSMUSG00000000308
362	7.88125	1161	59	Rcan1	Calcipressin-1 (Regulator of calcineurin 1)(Down syndrome critical region protein 1 homolog)(Myocyte-enriched calcineurin-interacting protein 1)(MCIP1)	ENSMUSG00000022951
363	7.87387	774	10	Cd24a	Signal transducer CD24 Precursor (M1/69-J11D heat stable antigen)(HSA)(Nectadrin)(Lymphocyte antigen 52)(Ly-52)(X62 heat stable antigen)(R13-Ag)(CD24 antigen)	ENSMUSG00000047139
364	7.86607	781	11	Prosc	Proline synthetase co-transcribed bacterial homolog protein	ENSMUSG00000031485
365	7.81879	1065	48	Zfyve27	Zinc finger FYVE domain-containing protein 27	ENSMUSG00000018820
366	7.80383	1531	108	Ube2r2	Ubiquitin-conjugating enzyme E2 R2 (EC 6.3.2.19)(Ubiquitin-protein ligase R2)(Ubiquitin carrier protein R2)(E2-CDC34B)	ENSMUSG00000036241
367	7.78182	756	9	Psma2	Proteasome subunit alpha type-2 (EC 3.4.25.1)(Proteasome component C3)(Macropain subunit C3)(Multicatalytic endopeptidase complex subunit C3)	ENSMUSG00000015671
368	7.76415	723	5	Fmo4	Dimethylaniline monooxygenase	ENSMUSG00000026692
369	7.75701	730	6	Cdca7l	Cell division cycle-associated 7-like protein (Transcription factor RAM2)	ENSMUSG00000021175
370	7.67327	675	0	Slco4a1	Solute carrier organic anion transporter family member 4A1 (Solute carrier family 21 member 12)(Sodium-independent organic anion transporter E)(Organic anion-transporting polypeptide E)(OATP-E)	ENSMUSG00000038963
371	7.66393	1770	143	Akap9	A kinase (PRKA) anchor protein (yotiao) 9	ENSMUSG00000040407
372	7.66337	674	0	Cpa6	Carboxypeptidase A6 Precursor (EC 3.4.17.1)	ENSMUSG00000042501
373	7.64786	12236	1512	mt-Nd6	NADH-ubiquinone oxidoreductase chain 6 (EC 1.6.5.3)(NADH dehydrogenase subunit 6)	ENSMUSG00000064367
374	7.64667	1047	49	Pafah1b2	Platelet-activating factor acetylhydrolase IB subunit beta (EC 3.1.1.47)(PAF acetylhydrolase 30 kDa subunit)(PAF-AH 30 kDa subunit)(PAF-AH subunit beta)(PAFAH subunit beta)	ENSMUSG00000003131
375	7.63158	770	13	Crispld2	Cysteine-rich secretory protein LCCL domain-containing 2 Precursor (Coffeecrisp)	ENSMUSG00000031825
376	7.63107	686	2	Epb4.1	Protein 4.1 (Band 4.1)(P4.1)(4.1R)	ENSMUSG00000028906
377	7.57273	733	9	1700112E06Rik	Leucine-rich repeat-containing protein C10orf11 homolog	ENSMUSG00000063458
378	7.55769	1079	55	Mrpl36	39S ribosomal protein L36, mitochondrial Precursor (L36mt)(MRP-L36)	ENSMUSG00000021607
379	7.53927	1340	90	Tpi1	Triosephosphate isomerase (TIM)(EC 5.3.1.1)(Triose-phosphate isomerase)	ENSMUSG00000023456
380	7.52717	1285	83	Utp23	rRNA-processing protein UTP23 homolog	ENSMUSG00000022313
381	7.46957	759	14	Ipo7	Importin-7 (Imp7)(Ran-binding protein 7)(RanBP7)	ENSMUSG00000066232
382	7.42786	1393	100	Itm2c	Integral membrane protein 2C (Transmembrane protein BRI3)	ENSMUSG00000026223
383	7.41509	686	5	Pi4ka	phosphatidylinositol 4-kinase type 3 alpha	ENSMUSG00000041720
384	7.41284	708	8	Pard6g	Partitioning defective 6 homolog gamma (PAR-6 gamma)(PAR6A)	ENSMUSG00000056214
385	7.40146	914	36	Zfp512	Zinc finger protein 512	ENSMUSG00000062761
386	7.39873	1069	57	Sag	S-arrestin (Retinal S-antigen)(S-AG)(48 kDa protein)(Rod photoreceptor arrestin)	ENSMUSG00000056055
387	7.3945	706	8	Limk2	LIM domain kinase 2 (LIMK-2)(EC 2.7.11.1)	ENSMUSG00000020451
388	7.39437	950	41	2010012O05Rik	UPF0693 protein C10orf32 homolog	ENSMUSG00000062376
389	7.38318	690	6	Ildr2	Lisch-like isoform 1	ENSMUSG00000040612
390	7.35656	4439	516	Larp1	La-related protein 1 (La ribonucleoprotein domain family member 1)	ENSMUSG00000037331
391	7.34375	840	27	Scarb2	Lysosome membrane protein 2 (Lysosome membrane protein II)(LIMP II)(Scavenger receptor class B member 2)(85 kDa lysosomal membrane sialoglycoprotein)(LGP85)	ENSMUSG00000029426
392	7.30735	4869	579	Ppif	Peptidyl-prolyl cis-trans isomerase, mitochondrial Precursor (PPIase)(Rotamase)(EC 5.2.1.8)(Cyclophilin F)	ENSMUSG00000021868
393	7.30097	652	2	Tmem139	transmembrane protein 139	ENSMUSG00000071506
394	7.29517	3978	458	Slc25a13	Calcium-binding mitochondrial carrier protein Aralar2 (Mitochondrial aspartate glutamate carrier 2)(Solute carrier family 25 member 13)(Citrin)	ENSMUSG00000015112
395	7.28972	680	6	Ckmt2	Creatine kinase, sarcomeric mitochondrial Precursor (EC 2.7.3.2)(S-MtCK)	ENSMUSG00000021622
396	7.28873	935	41	Irx1	Iroquois-class homeodomain protein IRX-1 (Iroquois homeobox protein 1)(Homeodomain protein IRXA1)	ENSMUSG00000060969
397	7.28141	1349	98	Smg6	Telomerase-binding protein EST1A (EC 3.1.-.-)(Ever shorter telomeres 1A)(Telomerase subunit EST1A)(EST1-like protein A)(Smg-6 homolog)	ENSMUSG00000038290
398	7.26535	3213	355	Ptprd	Receptor-type tyrosine-protein phosphatase delta Precursor (Protein-tyrosine phosphatase delta)(R-PTP-delta)(EC 3.1.3.48)	ENSMUSG00000028399
399	7.25186	4766	570	Snrpg	Small nuclear ribonucleoprotein G (snRNP-G)(Sm protein G)(Sm-G)(SmG)	ENSMUSG00000057278
400	7.24	986	49	Polr2g	DNA-directed RNA polymerase II subunit RPB7 (RNA polymerase II subunit B7)(DNA-directed RNA polymerase II subunit G)	ENSMUSG00000071662
401	7.17037	868	34	Dpp7	Dipeptidyl-peptidase 2 Precursor (EC 3.4.14.2)(Dipeptidyl-peptidase II)(DPP II)(Dipeptidyl aminopeptidase II)(Quiescent cell proline dipeptidase)(Dipeptidyl peptidase 7)	ENSMUSG00000026958
402	7.16129	1232	85	Fam69a	Protein FAM69A	ENSMUSG00000029270
403	7.13725	628	1	B9d1	B9 domain-containing protein 1 (Endothelial precursor cells protein B9)	ENSMUSG00000001039
404	7.1371	785	23	Tgfbr2	TGF-beta receptor type-2 Precursor (EC 2.7.11.30)(Transforming growth factor-beta receptor type II)(TGF-beta receptor type II)(TGF-beta type II receptor)(TbetaR-II)(TGFR-2)	ENSMUSG00000032440
405	7.13675	735	16	Imp4	U3 small nucleolar ribonucleoprotein protein IMP4 (U3 snoRNP protein IMP4)	ENSMUSG00000026127
406	7.12308	1289	94	Cops4	COP9 signalosome complex subunit 4 (Signalosome subunit 4)(SGN4)(JAB1-containing signalosome subunit 4)	ENSMUSG00000035297
407	7.11404	711	13	Col12a1	Collagen alpha-1(XII) chain Precursor	ENSMUSG00000032332
408	7.11382	775	22	March2	E3 ubiquitin-protein ligase MARCH2 (EC 6.3.2.-)(Membrane-associated RING finger protein 2)(Membrane-associated RING-CH protein II)(MARCH-II)	ENSMUSG00000079557
409	7.09783	1859	175	Letm1	LETM1 and EF-hand domain-containing protein 1, mitochondrial Precursor (Leucine zipper-EF-hand-containing transmembrane protein 1)	ENSMUSG00000005299
410	7.0976	67824	9469	Leap2	Liver-expressed antimicrobial peptide 2 Precursor (LEAP-2)	ENSMUSG00000036216
411	7.09579	1752	160	Cadm1	Cell adhesion molecule 1 Precursor (Immunoglobulin superfamily member 4)(Nectin-like protein 2)(NECL-2)(Tumor suppressor in lung cancer 1)(TSLC-1)(Synaptic cell adhesion molecule)(Spermatogenic immunoglobulin superfamily)(SgIGSF)	ENSMUSG00000032076
412	7.08716	1445	117	Ndufv3	NADH dehydrogenase	ENSMUSG00000024038
413	7.06731	635	3	Fam110c	Protein FAM110C	ENSMUSG00000036136
414	7.05469	803	27	Brd2	Bromodomain-containing protein 2 (Protein RING3)(Female sterile homeotic-related protein 1)(Fsrg-1)	ENSMUSG00000024335
415	7.0535	1614	142	Hnmt	Histamine N-methyltransferase (HMT)(EC 2.1.1.8)	ENSMUSG00000026986
416	7.04317	879	38	Trip12	thyroid hormone receptor interactor 12	ENSMUSG00000026219
417	7.02256	1768	165	Pfn2	Profilin-2 (Profilin II)	ENSMUSG00000027805
418	6.98828	1689	155	Impdh2	Inosine-5'-monophosphate dehydrogenase 2 (IMP dehydrogenase 2)(EC 1.1.1.205)(IMPDH-II)(IMPD 2)	ENSMUSG00000062867
419	6.98643	1444	120	Nucks1	Nuclear ubiquitous casein and cyclin-dependent kinases substrate (JC7)	ENSMUSG00000026434
420	6.95977	1111	73	Stard10	PCTP-like protein (PCTP-L)(StAR-related lipid transfer protein 10)(START domain-containing protein 10)(StARD10)(Serologically defined colon cancer antigen 28 homolog)	ENSMUSG00000030688
421	6.95935	756	22	Ncoa7	Nuclear receptor coactivator 7	ENSMUSG00000039697
422	6.95192	623	3	Arhgap5	Rho GTPase activating protein 5	ENSMUSG00000035133
423	6.94488	782	26	Tbc1d9	TBC1 domain family member 9	ENSMUSG00000031709
424	6.93069	600	0	Stk32a	Serine/threonine-protein kinase 32A (EC 2.7.11.1)	ENSMUSG00000039954
425	6.85833	723	19	Serbp1	Plasminogen activator inhibitor 1 RNA-binding protein (PAI1 RNA-binding protein 1)(PAI-RBP1)(SERPINE1 mRNA-binding protein 1)	ENSMUSG00000036371
426	6.85714	620	4	Cox4nb	Neighbor of COX4	ENSMUSG00000031819
427	6.85602	2519	281	Gltscr2	glioma tumor suppressor candidate region gene 2	ENSMUSG00000041560
428	6.84615	701	16	Fam158a	UPF0172 protein FAM158A	ENSMUSG00000022217
429	6.84277	988	58	Gle1	Nucleoporin GLE1 (GLE1-like protein)	ENSMUSG00000019715
430	6.83471	1554	141	C80913	Unconventional prefoldin RPB5 interactor (RNA polymerase II subunit 5-mediating protein)(RPB5-mediating protein)(Protein NNX3)	ENSMUSG00000030421
431	6.83333	597	1	Hormad2	HORMA domain-containing protein 2	ENSMUSG00000020419
432	6.82079	3706	457	Abhd14b	Abhydrolase domain-containing protein 14B (EC 3.-.-.-)(CCG1-interacting factor B)	ENSMUSG00000042073
433	6.81818	1025	64	5830415L20Rik	Protein FAM133B	ENSMUSG00000058503
434	6.79646	668	12	Actr10	Actin-related protein 10	ENSMUSG00000021076
435	6.78505	626	6	Ercc1	DNA excision repair protein ERCC-1	ENSMUSG00000003549
436	6.78212	2328	257	D19Wsu162e	Outcome predictor in acute leukemia 1 homolog	ENSMUSG00000047731
437	6.77857	849	39	Stk3	Serine/threonine-protein kinase 3 (EC 2.7.11.1)(STE20-like kinase MST2)(MST-2)(Mammalian STE20-like protein kinase 2)	ENSMUSG00000022329
438	6.75618	1812	182	Met	Hepatocyte growth factor receptor Precursor (HGF receptor)(EC 2.7.10.1)(Scatter factor receptor)(SF receptor)(HGF/SF receptor)(Met proto-oncogene tyrosine kinase)(c-Met)	ENSMUSG00000009376
439	6.7459	723	21	Bcam	basal cell adhesion molecule	ENSMUSG00000002980
440	6.73743	1106	78	Ndufs1	NADH-ubiquinone oxidoreductase 75 kDa subunit, mitochondrial Precursor (EC 1.6.5.3)(EC 1.6.99.3)(Complex I-75kD)(CI-75kD)	ENSMUSG00000025968
441	6.73418	964	57	Sec61a1	Protein transport protein Sec61 subunit alpha isoform 1 (Sec61 alpha-1)	ENSMUSG00000030082
442	6.72368	922	51	Znrf3	Zinc/RING finger protein 3 Precursor	ENSMUSG00000041961
443	6.70297	577	0	Scn4b	Sodium channel subunit beta-4 Precursor	ENSMUSG00000046480
444	6.69027	656	12	Tsc22d4	TSC22 domain family protein 4 (TSC22-related-inducible leucine zipper protein 2)	ENSMUSG00000029723
445	6.68391	1063	73	Insr	Insulin receptor Precursor (IR)(EC 2.7.10.1)(CD220 antigen)	ENSMUSG00000005534
446	6.64894	1150	87	Tsku	Tsukushin Precursor (Tsukushi)(Leucine-rich repeat-containing protein 54)	ENSMUSG00000049580
447	6.64545	631	9	Negr1	Neuronal growth regulator 1 Precursor (Kindred of IgLON)(Kilon protein)(Neurotractin)	ENSMUSG00000040037
448	6.63453	4166	542	Dnajc3	DnaJ homolog subfamily C member 3 Precursor (Interferon-induced, double-stranded RNA-activated protein kinase inhibitor)(Protein kinase inhibitor of 58 kDa)(Protein kinase inhibitor p58)	ENSMUSG00000022136
449	6.61264	3980	516	Erlin2	Erlin-2 (Endoplasmic reticulum lipid raft-associated protein 2)(Stomatin-prohibitin-flotillin-HflC/K domain-containing protein 2)(SPFH domain-containing protein 2)	ENSMUSG00000031483
450	6.61202	1110	82	Suv420h1	Histone-lysine N-methyltransferase SUV420H1 (EC 2.1.1.43)(Suppressor of variegation 4-20 homolog 1)(Su(var)4-20 homolog 1)(Suv4-20h1)	ENSMUSG00000045098
451	6.577	3274	412	Serinc1	Serine incorporator 1 (Tumor differentially expressed protein 2)(Tumor differentially expressed 1 protein-like)(Membrane protein TMS-2)(Axotomy-induced glyco/Golgi protein 2)	ENSMUSG00000019877
452	6.55446	562	0	Hsd17b14	dehydrogenase/reductase (SDR family) member 10	ENSMUSG00000030825
453	6.55288	1263	107	Ptprb	protein tyrosine phosphatase, receptor type, B	ENSMUSG00000020154
454	6.53761	8765	1255	Abce1	ATP-binding cassette sub-family E member 1 (RNase L inhibitor)(Ribonuclease 4 inhibitor)(RNS4I)	ENSMUSG00000058355
455	6.53254	1004	68	Gnai1	guanine nucleotide binding protein, alpha inhibiting 1	ENSMUSG00000057614
456	6.53008	67519	10254	Apoc3	Apolipoprotein C-III Precursor (Apo-CIII)(ApoC-III)	ENSMUSG00000032081
457	6.51923	578	3	Col23a1	Collagen alpha-1(XXIII) chain	ENSMUSG00000063564
458	6.51429	584	4	Fxyd5	FXYD domain-containing ion transport regulator 5 Precursor (Oncoprotein-induced protein 2)(Ion channel homolog RIC)(EF-8)	ENSMUSG00000009687
459	6.50758	759	31	Fam26f	Protein FAM26F	ENSMUSG00000046031
460	6.50485	570	2	Sh3kbp1	SH3 domain-containing kinase-binding protein 1 (SH3-containing, expressed in tumorigenic astrocytes)(Regulator of ubiquitous kinase)(Ruk)	ENSMUSG00000040990
461	6.49072	119829	18376	mt-Nd2	NADH-ubiquinone oxidoreductase chain 2 (EC 1.6.5.3)(NADH dehydrogenase subunit 2)	ENSMUSG00000064345
462	6.4717	1615	164	Ube2i	SUMO-conjugating enzyme UBC9 (EC 6.3.2.-)(SUMO-protein ligase)(Ubiquitin-conjugating enzyme E2 I)(Ubiquitin-protein ligase I)(Ubiquitin carrier protein I)(Ubiquitin carrier protein 9)(mUBC9)	ENSMUSG00000015120
463	6.46395	1962	218	Taf13	Transcription initiation factor TFIID subunit 13 (Transcription initiation factor TFIID 18 kDa subunit)(TAF(II)18)(TAFII-18)(TAFII18)	ENSMUSG00000048100
464	6.45517	836	44	Tmem63b	Transmembrane protein 63B	ENSMUSG00000036026
465	6.45255	784	36	Sbf1	Myotubularin-related protein 5 (SET-binding factor 1)(Sbf1)	ENSMUSG00000036529
466	6.45161	700	23	Egln2	Egl nine homolog 2 (EC 1.14.11.-)(Hypoxia-inducible factor prolyl hydroxylase 1)(HIF-prolyl hydroxylase 1)(HIF-PH1)(Falkor)	ENSMUSG00000058709
467	6.44041	3629	478	Spop	Speckle-type POZ protein (HIB homolog 1)(PDX-1 C-terminal-interacting factor 1)	ENSMUSG00000057522
468	6.43885	795	38	Asf1a	Histone chaperone ASF1A (Anti-silencing function protein 1 homolog A)	ENSMUSG00000019857
469	6.43802	679	20	Nus1	Nogo-B receptor Precursor (NgBR)(Nuclear undecaprenyl pyrophosphate synthase 1 homolog)	ENSMUSG00000023068
470	6.42547	1969	221	Lars2	Probable leucyl-tRNA synthetase, mitochondrial Precursor (EC 6.1.1.4)(Leucine--tRNA ligase)(LeuRS)	ENSMUSG00000035202
471	6.41593	1350	125	Aig1	Androgen-induced protein 1 (AIG-1)	ENSMUSG00000019806
472	6.40462	1008	72	Fam20b	Protein FAM20B Precursor	ENSMUSG00000033557
473	6.39597	853	48	Cmc1	COX assembly mitochondrial protein homolog (Cmc1p)	ENSMUSG00000039163
474	6.389	6174	881	Txnip	Thioredoxin-interacting protein (Vitamin D3 up-regulated protein 1)	ENSMUSG00000038393
475	6.38462	564	3	4833426J09Rik	pyruvate dehydrogenase phosphatase isoenzyme 2	ENSMUSG00000048371
476	6.37193	19602	2991	Agt	Angiotensinogen Precursor (Serpin A8)	ENSMUSG00000031980
477	6.36364	950	64	Efha1	EF-hand domain-containing family member A1	ENSMUSG00000021973
478	6.36364	1300	119	Smarca5	SWI/SNF-related matrix-associated actin-dependent regulator of chromatin subfamily A member 5 (EC 3.6.1.-)(Sucrose nonfermenting protein 2 homolog)(mSnf2h)	ENSMUSG00000031715
479	6.36268	3514	467	Sfrs18	Splicing factor, arginine/serine-rich 18 (Splicing factor, arginine/serine-rich 130)(Serine-arginine-rich-splicing regulatory protein 130)(SRrp130)	ENSMUSG00000028248
480	6.3619	568	4	Tsta3	GDP-L-fucose synthetase (EC 1.1.1.271)(Protein FX)(Red cell NADP(H)-binding protein)(GDP-4-keto-6-deoxy-D-mannose-3,5-epimerase-4-reductase)(Transplantation antigen P35B)(Tum-P35B antigen)	ENSMUSG00000022570
481	6.32143	785	39	Bin1	Myc box-dependent-interacting protein 1 (Bridging integrator 1)(Amphiphysin-like protein)(Amphiphysin II)(SH3 domain-containing protein 9)	ENSMUSG00000024381
482	6.29808	555	3	Btg1	Protein BTG1 (B-cell translocation gene 1 protein)	ENSMUSG00000036478
483	6.28302	899	58	Sfrs12	Splicing factor, arginine/serine-rich 12 (Serine-arginine-rich-splicing regulatory protein 86)(SRrp86)	ENSMUSG00000032621
484	6.27778	578	7	AI118078	Transmembrane protein C15orf27 homolog	ENSMUSG00000032313
485	6.26897	809	44	Trove2	60 kDa SS-A/Ro ribonucleoprotein (60 kDa ribonucleoprotein Ro)(RoRNP)(60 kDa Ro protein)(TROVE domain family member 2)	ENSMUSG00000018199
486	6.26475	4467	628	Set	Protein SET (Phosphatase 2A inhibitor I2PP2A)(I-2PP2A)(Template-activating factor I)(TAF-I)	ENSMUSG00000054766
487	6.24648	787	41	Idua	Alpha-L-iduronidase Precursor (EC 3.2.1.76)	ENSMUSG00000033540
488	6.24324	593	10	Cyp4f18	Cytochrome P450 4F3 (EC 1.14.13.30)(CYPIVF3)(Leukotriene-B(4) omega-hydroxylase)(Leukotriene-B(4) 20-monooxygenase)(Cytochrome P450-LTB-omega)	ENSMUSG00000003484
489	6.24272	543	2	Cd46	Membrane cofactor protein Precursor (CD46 antigen)	ENSMUSG00000016493
490	6.22689	1382	137	Sgms1	Phosphatidylcholine	ENSMUSG00000040451
491	6.20354	601	12	Gmps	GMP synthase	ENSMUSG00000027823
492	6.19651	1319	128	Tpd52l2	Tumor protein D54 (Tumor protein D52-like 2)	ENSMUSG00000000827
493	6.19399	2167	265	Gns	N-acetylglucosamine-6-sulfatase Precursor (G6S)(Glucosamine-6-sulfatase)(EC 3.1.6.14)	ENSMUSG00000034707
494	6.19217	1640	180	Rbl2	Retinoblastoma-like protein 2 (RBR-2)(PRB2)(130 kDa retinoblastoma-associated protein)(p130)	ENSMUSG00000031666
495	6.1871	4794	690	Chkb	Choline/ethanolamine kinase	ENSMUSG00000022617
496	6.17495	2759	362	Rad23b	UV excision repair protein RAD23 homolog B (mHR23B)(XP-C repair-complementing complex 58 kDa protein)(p58)	ENSMUSG00000028426
497	6.172	1443	149	Slc3a2	4F2 cell-surface antigen heavy chain (4F2hc)(CD98 antigen)	ENSMUSG00000010095
498	6.16212	3739	522	Nfe2l2	Nuclear factor erythroid 2-related factor 2 (NF-E2-related factor 2)(NFE2-related factor 2)(Nuclear factor, erythroid derived 2, like 2)	ENSMUSG00000015839
499	6.14894	767	40	Lpcat1	1-acylglycerophosphocholine O-acyltransferase 1 (EC 2.3.1.23)(Lung-type acyl-CoA	ENSMUSG00000021608
500	6.14655	613	15	Man1a2	Mannosyl-oligosaccharide 1,2-alpha-mannosidase IB (EC 3.2.1.113)(Processing alpha-1,2-mannosidase IB)(Alpha-1,2-mannosidase IB)(Mannosidase alpha class 1A member 2)	ENSMUSG00000008763
501	6.14053	2915	390	Prpf40a	Pre-mRNA-processing factor 40 homolog A (Formin-binding protein 3)(Formin-binding protein 11)(FBP-11)	ENSMUSG00000061136
502	6.13216	1292	126	Ccdc50	Coiled-coil domain-containing protein 50 (Protein Ymer)	ENSMUSG00000038127
503	6.12712	623	17	Pusl1	tRNA pseudouridine synthase-like 1 (EC 5.4.99.-)(tRNA-uridine isomerase-like 1)(tRNA pseudouridylate synthase-like 1)	ENSMUSG00000051557
504	6.12375	3562	497	Ftcd	Formimidoyltransferase-cyclodeaminase (Formiminotransferase-cyclodeaminase)(FTCD)	ENSMUSG00000001155
505	6.12171	3622	507	Mtch1	Mitochondrial carrier homolog 1 (Mitochondrial carrier-like protein 1)	ENSMUSG00000024012
506	6.10274	1682	191	Polr2c	DNA-directed RNA polymerase II subunit RPB3 (RNA polymerase II subunit B3)(RNA polymerase II subunit 3)(DNA-directed RNA polymerase II subunit C)(DNA-directed RNA polymerase II 33 kDa polypeptide)(RPB33)(RPB31)	ENSMUSG00000031783
507	6.09901	516	0	Wdr69	WD repeat domain 69	ENSMUSG00000053161
508	6.07726	2653	352	Dhcr24	24-dehydrocholesterol reductase Precursor (EC 1.3.1.-)(3-beta-hydroxysterol delta-24-reductase)	ENSMUSG00000034926
509	6.07383	805	48	Ppp1r12a	Protein phosphatase 1 regulatory subunit 12A (Myosin phosphatase-targeting subunit 1)(Myosin phosphatase target subunit 1)	ENSMUSG00000019907
510	6.0725	2329	299	Anpep	Aminopeptidase N (mAPN)(EC 3.4.11.2)(Alanyl aminopeptidase)(Microsomal aminopeptidase)(Aminopeptidase M)(Membrane protein p161)(CD13 antigen)	ENSMUSG00000039062
511	6.03883	1144	105	Arl3	ADP-ribosylation factor-like protein 3	ENSMUSG00000025035
512	6.03034	30709	5008	Gcdh	Glutaryl-CoA dehydrogenase, mitochondrial Precursor (GCD)(EC 1.3.99.7)	ENSMUSG00000003809
513	6.01887	538	5	Rragb	Ras-related GTP-binding protein B (Rag B)(RagB)	ENSMUSG00000041658
514	6.01186	1421	152	Tubb5	Tubulin beta-5 chain	ENSMUSG00000001525
515	5.97479	611	18	Ddit3	DNA damage-inducible transcript 3 (DDIT-3)(Growth arrest and DNA-damage-inducible protein GADD153)(C/EBP-homologous protein)(CHOP)	ENSMUSG00000025408
516	5.96899	2210	286	Cd82	CD82 antigen (Inducible membrane protein R2)(C33 antigen)(IA4)(CD82 antigen)	ENSMUSG00000027215
517	5.96575	771	45	Gigyf1	PERQ amino acid-rich with GYF domain-containing protein 1 (GRB10-interacting GYF protein 1)	ENSMUSG00000029714
518	5.95652	859	60	AC154586.2	CCAAT/enhancer binding protein (C/EBP), delta (Cebpd), mRNA	ENSMUSG00000071637
519	5.94118	506	1	Dusp26	Dual specificity protein phosphatase 26 (EC 3.1.3.48)(EC 3.1.3.16)(Dual specificity phosphatase SKRP3)	ENSMUSG00000039661
520	5.92857	1228	123	1500032L24Rik	UPF0466 protein C22orf32 homolog, mitochondrial Precursor	ENSMUSG00000022452
521	5.92105	1025	89	Znrf2	E3 ubiquitin-protein ligase ZNRF2 (EC 6.3.2.-)(Zinc/RING finger protein 2)	ENSMUSG00000058446
522	5.92079	498	0	Lrp10	Low-density lipoprotein receptor-related protein 10 Precursor	ENSMUSG00000022175
523	5.91139	834	57	Rbm17	Splicing factor 45 (45 kDa-splicing factor)(RNA-binding motif protein 17)	ENSMUSG00000037197
524	5.91038	1153	111	Baz1b	Bromodomain adjacent to zinc finger domain protein 1B (Williams-Beuren syndrome chromosomal region 9 protein homolog)(WBRS9)	ENSMUSG00000002748
525	5.90356	2716	376	AC165159.2-1	Transcription initiation factor TFIID subunit 9 (Transcription initiation factor TFIID 31 kDa subunit)(TAFII-31)(TAFII-32)(TAFII32)(RNA polymerase II TBP-associated factor subunit G)	ENSMUSG00000052293
526	5.90323	632	23	Mlycd	Malonyl-CoA decarboxylase, mitochondrial Precursor (MCD)(EC 4.1.1.9)	ENSMUSG00000074064
527	5.89032	813	54	Rsbn1l	round spermatid basic protein 1-like	ENSMUSG00000039968
528	5.85465	907	71	Mrpl19	39S ribosomal protein L19, mitochondrial Precursor (L19mt)(MRP-L19)	ENSMUSG00000030045
529	5.84706	894	69	Hexb	Beta-hexosaminidase subunit beta Precursor (EC 3.2.1.52)(N-acetyl-beta-glucosaminidase subunit beta)(Beta-N-acetylhexosaminidase subunit beta)(Hexosaminidase subunit B)	ENSMUSG00000021665
530	5.83212	699	36	Col6a3	Collagen alpha3(VI) Precursor; Fragment	ENSMUSG00000048126
531	5.83193	594	18	Reep4	Receptor expression-enhancing protein 4	ENSMUSG00000033589
532	5.83168	489	0	Slc6a11	Sodium- and chloride-dependent GABA transporter 3 (GAT-3)(Sodium- and chloride-dependent GABA transporter 4)(GAT-4)(Solute carrier family 6 member 11)	ENSMUSG00000030307
533	5.82759	1252	131	Lgals3bp	Galectin-3-binding protein Precursor (Lectin galactoside-binding soluble 3-binding protein)(Cyp-C-associated protein)(CyCAP)(Protein MAMA)	ENSMUSG00000033880
534	5.82609	570	14	Pcm1	Pericentriolar material 1 protein (PCM-1)(mPCM-1)	ENSMUSG00000031592
535	5.8178	1273	135	Ndufc1	NADH dehydrogenase	ENSMUSG00000037152
536	5.81356	2301	312	Pon2	Serum paraoxonase/arylesterase 2 (PON 2)(EC 3.1.1.2)(EC 3.1.8.1)(Serum aryldialkylphosphatase 2)(A-esterase 2)(Aromatic esterase 2)	ENSMUSG00000032667
537	5.8057	4382	671	AI316807	UPF0697 protein C8orf40 homolog	ENSMUSG00000031534
538	5.8	857	64	Tmem14a	Transmembrane protein 14A	ENSMUSG00000025933
539	5.79576	6739	1079	Gpd1	Glycerol-3-phosphate dehydrogenase	ENSMUSG00000023019
540	5.79333	769	49	Brd8	Bromodomain-containing protein 8	ENSMUSG00000003778
541	5.79224	2437	337	Tmem123	Porimin Precursor (Transmembrane protein 123)	ENSMUSG00000050912
542	5.79032	618	23	Cchcr1	Coiled-coil alpha-helical rod protein 1 (Alpha-helical coiled-coil rod protein)	ENSMUSG00000040312
543	5.7811	5895	936	Npm1	Nucleophosmin (NPM)(Nucleolar phosphoprotein B23)(Numatrin)(Nucleolar protein NO38)	ENSMUSG00000057113
544	5.77863	657	30	6330416G13Rik	Transmembrane protein C9orf91 homolog	ENSMUSG00000045917
545	5.77536	697	37	Polr2j	DNA-directed RNA polymerase II subunit RPB11 (RNA polymerase II subunit B11)(DNA-directed RNA polymerase II subunit J)(DNA-directed RNA polymerase II 13.3 kDa polypeptide)(RPB14)	ENSMUSG00000039771
546	5.77273	535	9	Dnmt3a	DNA (cytosine-5)-methyltransferase 3A (Dnmt3a)(EC 2.1.1.37)(DNA methyltransferase MmuIIIA)(DNA MTase MmuIIIA)(M.MmuIIIA)	ENSMUSG00000020661
547	5.77193	558	13	Os9	osteosarcoma amplified 9	ENSMUSG00000040462
548	5.76423	609	22	Gnl3	Guanine nucleotide-binding protein-like 3 (Nucleolar GTP-binding protein 3)(Nucleostemin)	ENSMUSG00000042354
549	5.76066	1657	204	Baz2a	Bromodomain adjacent to zinc finger domain protein 2A (Transcription termination factor I-interacting protein 5)(TTF-I-interacting protein 5)(Tip5)	ENSMUSG00000040054
550	5.75988	1795	228	Isg15	Ubiquitin cross-reactive protein Precursor (Interferon-stimulated protein 15)(IP17)	ENSMUSG00000035692
551	5.74675	785	53	Ptk2	Focal adhesion kinase 1 (FADK 1)(EC 2.7.10.2)(pp125FAK)	ENSMUSG00000022607
552	5.72549	484	1	Kif13b	kinesin family member 13B	ENSMUSG00000060012
553	5.72472	919	77	Tmem149	Transmembrane protein 149 Precursor (U2 small nuclear RNA auxiliary factor 1-like 4)	ENSMUSG00000036826
554	5.71053	551	13	Mrps25	28S ribosomal protein S25, mitochondrial (S25mt)(MRP-S25)	ENSMUSG00000014551
555	5.70796	545	12	Fermt1	Fermitin family homolog 1 (Unc-112-related protein 1)(Kindlin-1)	ENSMUSG00000027356
556	5.6962	800	57	Erich1	glutamate-rich 1	ENSMUSG00000051978
557	5.65972	715	43	Ppp2r3c	Serine/threonine-protein phosphatase 2A regulatory subunit B'' subunit gamma (Protein phosphatase subunit G5PR)	ENSMUSG00000021022
558	5.65833	579	19	Taf5l	TAF5-like RNA polymerase II p300/CBP-associated factor-associated factor 65 kDa subunit 5L (PCAF-associated factor 65 beta)(PAF65-beta)	ENSMUSG00000038697
559	5.65714	890	74	Wwc2	Protein WWC2 (WW domain-containing protein 2)	ENSMUSG00000031563
560	5.65686	1054	103	Nfat5	Nuclear factor of activated T-cells 5 (NF-AT5)(T-cell transcription factor NFAT5)(Rel domain-containing transcription factor NFAT5)	ENSMUSG00000003847
561	5.64532	1046	102	Snrpn	Small nuclear ribonucleoprotein-associated protein N (snRNP-N)(Sm protein N)(Sm-N)(SmN)(Sm-D)(Tissue-specific-splicing protein)	ENSMUSG00000000948
562	5.63087	739	48	Sccpdh	Probable saccharopine dehydrogenase (EC 1.5.1.9)	ENSMUSG00000038936
563	5.63025	570	18	Zscan29	Zinc finger SCAN domains 29	ENSMUSG00000050619
564	5.62242	1806	238	Tbrg4	Protein TBRG4 (Transforming growth factor beta regulator 4)	ENSMUSG00000000384
565	5.62069	552	15	Cyb561d2	Cytochrome b561 domain-containing protein 2 (Putative tumor suppressor protein 101F6)	ENSMUSG00000037190
566	5.6181	30631	5369	Hpx	Hemopexin Precursor	ENSMUSG00000030895
567	5.61438	759	52	Atg4c	Cysteine protease ATG4C (EC 3.4.22.-)(Autophagy-related protein 4 homolog C)(Autophagin-3)(Autophagy-related cysteine endopeptidase 3)(AUT-like 3 cysteine endopeptidase)	ENSMUSG00000028550
568	5.61165	478	2	Alg12	Dolichyl-P-Man	ENSMUSG00000035845
569	5.61037	153181	27220	Ahsg	Alpha-2-HS-glycoprotein Precursor (Fetuin-A)(Countertrypin)	ENSMUSG00000022868
570	5.59836	583	21	Metap2	Methionine aminopeptidase 2 (MetAP 2)(MAP 2)(EC 3.4.11.18)(Peptidase M 2)(Initiation factor 2-associated 67 kDa glycoprotein)(p67eIF2)(p67)	ENSMUSG00000036112
571	5.57895	854	70	Igsf8	Immunoglobulin superfamily member 8 Precursor (CD81 partner 3)(Glu-Trp-Ile EWI motif-containing protein 2)(EWI-2)(Keratinocytes-associated transmembrane protein 4)(KCT-4)(Prostaglandin regulatory-like protein)(CD316 antigen)	ENSMUSG00000038034
572	5.57143	524	11	Ccdc120	coiled-coil domain containing 120	ENSMUSG00000031150
573	5.56777	1420	172	Smc3	Structural maintenance of chromosomes protein 3 (Chondroitin sulfate proteoglycan 6)(Chromosome segregation protein SmcD)(Basement membrane-associated chondroitin proteoglycan)(Bamacan)(Mad member-interacting protein 1)	ENSMUSG00000024974
574	5.56522	796	60	Cebpg	CCAAT/enhancer-binding protein gamma (C/EBP gamma)(Immunoglobulin enhancer-binding protein 1)(IG/EBP-1)(Granulocyte colony-stimulating factor promoter element 1-binding protein)(GPE1-binding protein)(GPE1-BP)	ENSMUSG00000056216
575	5.56311	473	2	D2Bwg1335e	DNL-type zinc finger protein	ENSMUSG00000075467
576	5.55738	917	82	Rock1	Rho-associated protein kinase 1 (EC 2.7.11.1)(Rho-associated, coiled-coil-containing protein kinase 1)(p160 ROCK-1)(p160ROCK)	ENSMUSG00000024290
577	5.5567	978	93	Golga2	Golgin subfamily A member 2 (Cis-Golgi matrix protein GM130)	ENSMUSG00000002546
578	5.55155	977	93	Rnf170	RING finger protein 170	ENSMUSG00000013878
579	5.54063	1673	219	Pnpla7	Patatin-like phospholipase domain-containing protein 7 (EC 3.1.1.-)	ENSMUSG00000036833
580	5.53571	520	11	Trib2	Tribbles homolog 2 (TRB-2)	ENSMUSG00000020601
581	5.53425	708	45	Macf1	Microtubule-actin cross-linking factor 1 (Actin cross-linking family 7)	ENSMUSG00000028649
582	5.53302	1073	111	Pomgnt1	Protein O-linked-mannose beta-1,2-N-acetylglucosaminyltransferase 1 (POMGnT1)(EC 2.4.1.-)	ENSMUSG00000028700
583	5.52941	464	1	Myo15b	MKIAA1783 protein Fragment	ENSMUSG00000034427
584	5.51936	2323	338	Rdbp	Negative elongation factor E (NELF-E)(RNA-binding protein RD)	ENSMUSG00000024369
585	5.51316	2414	355	Qdpr	Dihydropteridine reductase (EC 1.5.1.34)(HDHPR)(Quinoid dihydropteridine reductase)	ENSMUSG00000015806
586	5.5092	798	62	Rbm8a	hypothetical protein LOC545388	ENSMUSG00000038374
587	5.50427	1188	133	AC132088.4-2	Nuclear protein Hcc-1	ENSMUSG00000051255
588	5.5	1561	201	Nr2f6	Nuclear receptor subfamily 2 group F member 6 (Orphan nuclear receptor EAR-2)(V-erbA-related protein EAR-2)	ENSMUSG00000002393
589	5.49789	1203	136	Hltf	Helicase-like transcription factor (EC 3.6.1.-)(SWI/SNF-related matrix-associated actin-dependent regulator of chromatin subfamily A member 3)(Sucrose nonfermenting protein 2-like 3)(TNF-response element-binding protein)(P113)	ENSMUSG00000002428
590	5.48515	1008	101	Cgnl1	Cingulin-like protein 1 (Junction-associated coiled-coil protein)	ENSMUSG00000032232
591	5.48355	1567	203	Slc46a1	Proton-coupled folate transporter (Heme carrier protein 1)(PCFT/HCP1)(Solute carrier family 46 member 1)	ENSMUSG00000020829
592	5.47788	519	12	Mipep	Mitochondrial intermediate peptidase Precursor (MIP)(EC 3.4.24.59)	ENSMUSG00000021993
593	5.47059	458	1	Usp53	Inactive ubiquitin carboxyl-terminal hydrolase 53 (Inactive ubiquitin-specific peptidase 53)(Per-hexamer repeat protein 3)	ENSMUSG00000039701
594	5.45545	451	0	Otp	Homeobox protein orthopedia	ENSMUSG00000021685
595	5.45098	456	1	Dctd	Deoxycytidylate deaminase (EC 3.5.4.12)(dCMP deaminase)	ENSMUSG00000031562
596	5.44361	624	32	Itga7	Integrin alpha-7 Precursor	ENSMUSG00000025348
597	5.43689	460	2	Fosb	Protein fosB	ENSMUSG00000003545
598	5.43049	1111	122	Hadha	Trifunctional enzyme subunit alpha, mitochondrial Precursor (TP-alpha)	ENSMUSG00000025745
599	5.42574	448	0	Man1c1	mannosidase, alpha, class 1C, member 1	ENSMUSG00000037306
600	5.40777	457	2	Zfp146	Zinc finger protein OZF (Only zinc finger protein)(Zinc finger protein 146)	ENSMUSG00000037029
601	5.40566	473	5	Nipbl	Nipped-B-like protein (Delangin homolog)(SCC2 homolog)	ENSMUSG00000022141
602	5.40237	1726	237	Atpif1	ATPase inhibitor, mitochondrial Precursor	ENSMUSG00000054428
603	5.38824	816	69	Zfpm1	Zinc finger protein ZFPM1 (Zinc finger protein multitype 1)(Friend of GATA protein 1)(Friend of GATA-1)(FOG-1)	ENSMUSG00000049577
604	5.38095	578	25	Srfbp1	Serum response factor-binding protein 1 (SRF-dependent transcription regulation-associated protein)(p49/STRAP)	ENSMUSG00000024528
605	5.3619	463	4	9130213B05Rik	Protein PARM-1 Precursor	ENSMUSG00000034981
606	5.36158	849	76	Proc	Vitamin K-dependent protein C Precursor (EC 3.4.21.69)(Autoprothrombin IIA)(Anticoagulant protein C)(Blood coagulation factor XIV)	ENSMUSG00000024386
607	5.35498	1137	130	Ppig	Peptidyl-prolyl cis-trans isomerase G (Peptidyl-prolyl isomerase G)(PPIase G)(Rotamase G)(EC 5.2.1.8)(Cyclophilin G)	ENSMUSG00000042133
608	5.34615	456	3	Cybrd1	Cytochrome b reductase 1 (EC 1.-.-.-)(Duodenal cytochrome b)	ENSMUSG00000027015
609	5.32474	933	93	Homer3	Homer protein homolog 3 (Homer-3)	ENSMUSG00000003573
610	5.30952	569	25	Foxa1	Hepatocyte nuclear factor 3-alpha (HNF-3-alpha)(HNF-3A)(Forkhead box protein A1)	ENSMUSG00000035451
611	5.30627	3625	601	Psmb7	Proteasome subunit beta type-7 Precursor (EC 3.4.25.1)(Proteasome subunit Z)(Macropain chain Z)(Multicatalytic endopeptidase complex chain Z)	ENSMUSG00000026750
612	5.29464	493	11	5033411D12Rik	CaiB/baiF CoA-transferase family protein C7orf10 homolog (EC 2.-.-.-)	ENSMUSG00000055137
613	5.29032	884	85	Kpna6	Importin subunit alpha-7 (Karyopherin subunit alpha-6)(Importin alpha S2)	ENSMUSG00000003731
614	5.29026	2725	433	Stt3b	Dolichyl-diphosphooligosaccharide--protein glycosyltransferase subunit STT3B (Oligosaccharyl transferase subunit STT3B)(STT3-B)(EC 2.4.1.119)(Source of immunodominant MHC-associated peptides)(B6dom1 antigen)	ENSMUSG00000032437
615	5.28571	1972	291	Tm9sf3	Transmembrane 9 superfamily member 3 Precursor	ENSMUSG00000025016
616	5.27723	433	0	Mxi1	MAX-interacting protein 1 (Protein MXI1)	ENSMUSG00000025025
617	5.2686	1175	141	Rad9	Cell cycle checkpoint control protein RAD9A (mRAD9)(EC 3.1.11.2)(DNA repair exonuclease rad9 homolog A)(Rad9-like protein)	ENSMUSG00000024824
618	5.26531	932	95	Snx6	Sorting nexin-6	ENSMUSG00000005656
619	5.25714	452	4	Mmaa	Methylmalonic aciduria type A homolog, mitochondrial Precursor	ENSMUSG00000037022
620	5.25651	1314	168	Gltp	Glycolipid transfer protein (GLTP)	ENSMUSG00000011884
621	5.25362	625	37	Slc39a9	Zinc transporter ZIP9 (Zrt- and Irt-like protein 9)(ZIP-9)(Solute carrier family 39 member 9)	ENSMUSG00000048833
622	5.25348	3672	617	Efna1	Ephrin-A1 Precursor (EPH-related receptor tyrosine kinase ligand 1)(LERK-1)(Immediate early response protein B61)	ENSMUSG00000027954
623	5.23944	644	41	AA960436	UPF0406 protein C16orf57 homolog	ENSMUSG00000031792
624	5.23333	999	109	Mme	Neprilysin (EC 3.4.24.11)(Neutral endopeptidase 24.11)(Neutral endopeptidase)(NEP)(Enkephalinase)(Atriopeptidase)(CD10 antigen)	ENSMUSG00000027820
625	5.23317	2077	315	Rmnd5a	Protein RMD5 homolog A	ENSMUSG00000002222
626	5.23267	957	101	2310033P09Rik	Multiple myeloma tumor-associated protein 2 homolog	ENSMUSG00000020441
627	5.22679	6261	1116	Nap1l1	Nucleosome assembly protein 1-like 1 (NAP-1-related protein)(Brain protein DN38)	ENSMUSG00000058799
628	5.2243	459	6	4632428N05Rik	Platelet receptor Gi24 Precursor	ENSMUSG00000020101
629	5.20792	426	0	Wee2	Wee1-like protein kinase 2 (EC 2.7.10.2)(Wee1-like protein kinase 1B)(Wee1B kinase)(mWee1B)	ENSMUSG00000037159
630	5.2069	504	15	Clstn1	Calsyntenin-1 Precursor (Alcadein-alpha)(Alc-alpha)	ENSMUSG00000039953
631	5.1958	643	42	Pcf11	pre-mRNA cleavage complex II protein Pcf11	ENSMUSG00000041328
632	5.1915	15298	2865	Alas1	5-aminolevulinate synthase, nonspecific, mitochondrial Precursor (EC 2.3.1.37)(5-aminolevulinic acid synthase)(Delta-aminolevulinate synthase)(Delta-ALA synthetase)(ALAS-H)	ENSMUSG00000032786
633	5.18881	642	42	Lancl1	LanC-like protein 1 (40 kDa erythrocyte membrane protein)(p40)	ENSMUSG00000026000
634	5.18367	1170	144	Mtap7d1	MAP7 domain-containing protein 1	ENSMUSG00000028849
635	5.17757	454	6	Xdh	Xanthine dehydrogenase/oxidase	ENSMUSG00000024066
636	5.17523	1613	230	Ppp1cb	Serine/threonine-protein phosphatase PP1-beta catalytic subunit (PP-1B)(EC 3.1.3.16)	ENSMUSG00000014956
637	5.16832	422	0	Tubb4	Tubulin beta-4 chain	ENSMUSG00000062591
638	5.16736	1135	138	Zdhhc9	Palmitoyltransferase ZDHHC9 (EC 2.3.1.-)(Zinc finger DHHC domain-containing protein 9)(DHHC-9)(DHHC9)	ENSMUSG00000036985
639	5.16667	706	55	Pskh1	Serine/threonine-protein kinase H1 (EC 2.7.11.1)(PSK-H1)	ENSMUSG00000048310
640	5.16505	432	2	Katnal2	Katanin p60 ATPase-containing subunit A-like 2 (Katanin p60 subunit A-like 2)(EC 3.6.4.3)(p60 katanin-like 2)	ENSMUSG00000025420
641	5.13816	681	51	Snx4	Sorting nexin-4	ENSMUSG00000022808
642	5.12745	423	1	Upk3a	Uroplakin-3A Precursor (UP3)(Uroplakin III)(UPIII)	ENSMUSG00000022435
643	5.1129	1168	147	Prnp	Major prion protein Precursor (PrP)(PrP27-30)(PrP33-35C)(CD230 antigen)	ENSMUSG00000079037
644	5.10698	998	114	Ran	GTP-binding nuclear protein Ran (GTPase Ran)(Ras-related nuclear protein)(Ras-like protein TC4)	ENSMUSG00000029430
645	5.09722	634	43	Ets2	Protein C-ets-2	ENSMUSG00000022895
646	5.09346	445	6	Ptplb	Protein-tyrosine phosphatase-like member B	ENSMUSG00000035376
647	5.09091	460	9	Scn1b	Sodium channel subunit beta-1 Precursor	ENSMUSG00000019194
648	5.08824	419	1	Myocd	Myocardin (SRF cofactor protein)(Basic SAP coiled-coil transcription activator 2)	ENSMUSG00000020542
649	5.08377	871	90	Lims2	LIM and senescent cell antigen-like-containing domain protein 2 (Particularly interesting new Cys-His protein 2)(PINCH-2)	ENSMUSG00000024395
650	5.08333	1425	199	Brd3	Bromodomain-containing protein 3 (Bromodomain-containing FSH-like protein FSRG2)	ENSMUSG00000026918
651	5.07009	985	113	Mrpl40	39S ribosomal protein L40, mitochondrial Precursor (L40mt)(MRP-L40)(Nuclear localization signal-containing protein deleted in velocardiofacial syndrome homolog)	ENSMUSG00000022706
652	5.06832	716	60	Ccl27a	chemokine (C-C motif) ligand 27A isoform b	ENSMUSG00000073888
653	5.05859	10174	1930	Rpl37	60S ribosomal protein L37	ENSMUSG00000041841
654	5.04959	511	20	Tagln2	Transgelin-2 (SM22-beta)	ENSMUSG00000026547
655	5.04274	1670	250	Ccdc104	Coiled-coil domain-containing protein 104	ENSMUSG00000020462
656	5.03306	509	20	Ptafr	Platelet-activating factor receptor (PAF-R)	ENSMUSG00000056529
657	5.03116	1676	252	Zmym2	Zinc finger MYM-type protein 2 (Zinc finger protein 198)	ENSMUSG00000021945
658	5.02336	975	113	Fcgrt	IgG receptor FcRn large subunit p51 Precursor (FcRn)(Neonatal Fc receptor)(IgG Fc fragment receptor transporter alpha chain)	ENSMUSG00000003420
659	5.02128	844	87	Dhrs11	Dehydrogenase/reductase SDR family member 11 Precursor (EC 1.-.-.-)	ENSMUSG00000034449
660	5.00901	456	10	Hspa12a	Heat shock 70 kDa protein 12A	ENSMUSG00000025092
661	4.984	523	24	Trit1	tRNA isopentenyltransferase, mitochondrial Precursor (IPTase)(EC 2.5.1.8)(Isopentenyl-diphosphate	ENSMUSG00000028653
662	4.98072	7132	1351	Atp5j2	ATP synthase subunit f, mitochondrial	ENSMUSG00000038690
663	4.97959	632	46	Adsl	Adenylosuccinate lyase (ASL)(EC 4.3.2.2)(Adenylosuccinase)(ASase)	ENSMUSG00000022407
664	4.97656	537	27	C1d	Nuclear nucleic acid-binding protein C1D (mC1D)(Small unique nuclear receptor corepressor)(Sun-CoR)(SunCoR)	ENSMUSG00000000581
665	4.96123	6042	1137	Dhrs3	Short-chain dehydrogenase/reductase 3 (EC 1.1.-.-)(Retinal short-chain dehydrogenase/reductase 1)(retSDR1)	ENSMUSG00000066026
666	4.95874	5548	1038	Mtss1	Metastasis suppressor protein 1 (Missing in metastasis protein)	ENSMUSG00000022353
667	4.95327	430	6	Plekha4	Pleckstrin homology domain-containing family A member 4 (Phosphoinositol 3-phosphate-binding protein 1)(PEPP-1)	ENSMUSG00000040428
668	4.95028	796	80	Ap3m1	AP-3 complex subunit mu-1 (Adapter-related protein complex 3 mu-1 subunit)(AP-3 adapter complex mu3A subunit)(Mu-adaptin 3A)(Mu3A-adaptin)	ENSMUSG00000021824
669	4.94177	7199	1376	Ctsc	Dipeptidyl-peptidase 1 Precursor (EC 3.4.14.1)(Dipeptidyl-peptidase I)(DPP-I)(DPPI)(Cathepsin C)(Cathepsin J)(Dipeptidyl transferase)	ENSMUSG00000030560
670	4.92248	535	28	Hp1bp3	Heterochromatin protein 1-binding protein 3	ENSMUSG00000028759
671	4.91953	3629	657	Impa1	Inositol monophosphatase (EC 3.1.3.25)(Inositol-1(or 4)-monophosphatase)(IMPase)(IMP)(Lithium-sensitive myo-inositol monophosphatase A1)	ENSMUSG00000027531
672	4.91515	711	64	Cnih4	Protein cornichon homolog 4	ENSMUSG00000062169
673	4.91515	711	64	Tmem101	Transmembrane protein 101	ENSMUSG00000020921
674	4.90556	783	79	Rnf167	E3 ubiquitin-protein ligase RNF167 Precursor (EC 6.3.2.-)(RING finger protein 167)	ENSMUSG00000040746
675	4.89937	679	58	Arrdc1	Arrestin domain-containing protein 1	ENSMUSG00000026972
676	4.89524	928	109	Tmub1	Transmembrane and ubiquitin-like domain-containing protein 1	ENSMUSG00000028958
677	4.89216	399	1	Umod	Uromodulin Precursor (Tamm-Horsfall urinary glycoprotein)(THP)	ENSMUSG00000030963
678	4.88439	745	72	3110056O03Rik	Signal peptide peptidase-like 2B (Protein SPP-like 2B)(Protein SPPL2b)(EC 3.4.23.-)	ENSMUSG00000035206
679	4.87391	1021	129	Myo1c	Myosin-Ic (Myosin I beta)(MMIb)	ENSMUSG00000017774
680	4.86792	416	5	Ift57	Intraflagellar transport protein 57 homolog (HIP1-interacting protein)	ENSMUSG00000032965
681	4.86585	698	63	Sfrs2ip	splicing factor, arginine/serine-rich 2, interacting protein	ENSMUSG00000033228
682	4.86538	1165	159	Esf1	ESF1 homolog (ABT1-associated protein)	ENSMUSG00000045624
683	4.86423	1763	282	Gsto1	Glutathione S-transferase omega-1 (EC 2.5.1.18)(GSTO 1-1)(p28)	ENSMUSG00000025068
684	4.85714	410	4	Galns	N-acetylgalactosamine-6-sulfatase Precursor (EC 3.1.6.4)(N-acetylgalactosamine-6-sulfate sulfatase)(Galactose-6-sulfate sulfatase)(GalNAc6S sulfatase)(Chondroitinsulfatase)(Chondroitinase)	ENSMUSG00000015027
685	4.855	1842	299	Ap2m1	AP-2 complex subunit mu-1 (Mu2-adaptin)(AP-2 mu-2 chain)(Plasma membrane adaptor AP-2 50 kDa protein)(Clathrin assembly protein complex 2 medium chain)(Clathrin coat assembly protein AP50)(Clathrin coat-associated protein AP50)	ENSMUSG00000022841
686	4.84177	665	57	Tmem42	Transmembrane protein 42	ENSMUSG00000066233
687	4.84034	4508	851	Mlxipl	Williams-Beuren syndrome chromosomal region 14 protein homolog (Mlx interactor)(MLX-interacting protein-like)	ENSMUSG00000005373
688	4.83333	567	37	Leprotl1	Leptin receptor overlapping transcript-like 1	ENSMUSG00000031513
689	4.83007	639	52	Arnt	Aryl hydrocarbon receptor nuclear translocator (ARNT protein)(Dioxin receptor, nuclear translocator)(Hypoxia-inducible factor 1 beta)(HIF-1 beta)	ENSMUSG00000015522
690	4.82327	2056	346	Mtus1	Mitochondrial tumor suppressor 1 homolog (Angiotensin-II type 2 receptor-interacting protein)(AT2 receptor-binding protein)(Coiled-coiled tumor suppressor gene 1 protein)	ENSMUSG00000045636
691	4.82143	980	123	Amdhd2	Putative N-acetylglucosamine-6-phosphate deacetylase (EC 3.5.1.25)(GlcNAc 6-P deacetylase)(Amidohydrolase domain-containing protein 2)	ENSMUSG00000036820
692	4.81579	449	13	Gnb1	Guanine nucleotide-binding protein G(I)/G(S)/G(T) subunit beta-1 (Transducin beta chain 1)	ENSMUSG00000029064
693	4.81413	1195	168	Zmat2	Zinc finger matrin-type protein 2	ENSMUSG00000001383
694	4.80172	1014	131	Sfrs10	Splicing factor, arginine/serine-rich 10 (Transformer-2-beta)(HTRA2-beta)(Transformer 2 protein homolog)(Silica-induced gene 41 protein)(SIG-41)	ENSMUSG00000022858
695	4.79091	427	9	Amigo2	Amphoterin-induced protein 2 Precursor (AMIGO-2)(Alivin-1)	ENSMUSG00000048218
696	4.79048	403	4	Acap1	ARFGAP with coiled-coil, ANK repeat and PH domain-containing protein 1 (Centaurin-beta-1)(Cnt-b1)	ENSMUSG00000001588
697	4.78302	914	111	Eea1	Early endosome antigen 1	ENSMUSG00000036499
698	4.77124	630	52	Rtf1	Paf1/RNA polymerase II complex component	ENSMUSG00000027304
699	4.77103	921	113	Gnaq	Guanine nucleotide-binding protein G(q) subunit alpha (Guanine nucleotide-binding protein alpha-q)	ENSMUSG00000024639
700	4.75969	514	28	Cep350	Putative uncharacterized protein Fragment	ENSMUSG00000033671
701	4.75481	889	107	Gpam	Glycerol-3-phosphate acyltransferase, mitochondrial Precursor (GPAT)(EC 2.3.1.15)(P90)	ENSMUSG00000024978
702	4.75	1344	203	Rnf11	RING finger protein 11 (NEDD4 WW domain-binding protein 2)(Sid 1669)	ENSMUSG00000028557
703	4.75	413	7	Tmem184a	Transmembrane protein 184A	ENSMUSG00000036687
704	4.74847	674	62	Zbtb45	zinc finger and BTB domain containing 45	ENSMUSG00000049600
705	4.74831	2711	491	Ctsz	Cathepsin Z Precursor (EC 3.4.18.1)	ENSMUSG00000016256
706	4.74815	541	34	Pm20d1	Probable carboxypeptidase PM20D1 Precursor (EC 3.4.17.-)(Peptidase M20 domain-containing protein 1)	ENSMUSG00000042251
707	4.74157	744	77	Prkag1	5'-AMP-activated protein kinase subunit gamma-1 (AMPK gamma-1 chain)(AMPKg)	ENSMUSG00000067713
708	4.74046	521	30	Bok	Bcl-2-related ovarian killer protein (Matador protein)(Apoptosis activator Mtd)	ENSMUSG00000026278
709	4.73729	459	17	Myo6	Myosin-VI	ENSMUSG00000033577
710	4.73611	582	43	Pms1	postmeiotic segregation increased 1	ENSMUSG00000026098
711	4.73451	435	12	Htra1	Serine protease HTRA1 Precursor (EC 3.4.21.-)(Serine protease 11)	ENSMUSG00000006205
712	4.73333	397	4	D10Wsu52e	UPF0027 protein C22orf28 homolog	ENSMUSG00000001783
713	4.73091	1201	174	Smad5	Mothers against decapentaplegic homolog 5 (Mothers against DPP homolog 5)(SMAD 5)(Smad5)(mSmad5)(Dwarfin-C)(Dwf-C)	ENSMUSG00000021540
714	4.72783	10618	2166	Bsg	Basigin Precursor (Basic immunoglobulin superfamily)(Membrane glycoprotein gp42)(HT7 antigen)(CD147 antigen)	ENSMUSG00000023175
715	4.72006	14839	3064	Cat	Catalase (EC 1.11.1.6)	ENSMUSG00000027187
716	4.70886	1760	294	Vasp	Vasodilator-stimulated phosphoprotein (VASP)	ENSMUSG00000030403
717	4.70642	413	8	Gpr116	G protein-coupled receptor 116	ENSMUSG00000056492
718	4.7027	422	10	Dennd1c	DENN domain-containing protein 1C	ENSMUSG00000002668
719	4.69264	984	130	Zdhhc20	Probable palmitoyltransferase ZDHHC20 (EC 2.3.1.-)(Zinc finger DHHC domain-containing protein 20)(DHHC-20)	ENSMUSG00000021969
720	4.68644	453	17	Cox19	Cytochrome c oxidase assembly protein COX19	ENSMUSG00000045438
721	4.68144	1590	260	Rbm5	RNA-binding protein 5 (RNA-binding motif protein 5)(Tumor suppressor LUCA15)	ENSMUSG00000032580
722	4.65347	2250	404	Sgpp1	Sphingosine-1-phosphate phosphatase 1 (SPPase1)(SPP)(mSPP1)(EC 3.1.3.-)(Sphingosine-1-phosphatase 1)	ENSMUSG00000021054
723	4.65217	435	14	Slc1a1	Excitatory amino acid transporter 3 (Sodium-dependent glutamate/aspartate transporter 3)(Excitatory amino-acid carrier 1)(Solute carrier family 1 member 1)	ENSMUSG00000024935
724	4.64977	909	116	Ctr9	RNA polymerase-associated protein CTR9 homolog (SH2 domain-binding protein 1)(Tetratricopeptide repeat-containing, SH2-binding phosphoprotein of 150 kDa)(TPR-containing, SH2-binding phosphoprotein of 150 kDa)(p150TSP)	ENSMUSG00000005609
725	4.64615	504	29	Tsga10	Testis-specific gene 10 protein	ENSMUSG00000060771
726	4.6381	387	4	Hsd17b1	Estradiol 17-beta-dehydrogenase 1 (EC 1.1.1.62)(17-beta-hydroxysteroid dehydrogenase type 1)(17-beta-HSD 1)	ENSMUSG00000019301
727	4.63684	781	89	Sh3bgrl3	SH3 domain-binding glutamic acid-rich-like protein 3	ENSMUSG00000028843
728	4.62667	594	49	Gpatch1	G patch domain-containing protein 1	ENSMUSG00000063808
729	4.61957	750	83	Tceal8	Transcription elongation factor A protein-like 8 (TCEA-like protein 8)(Transcription elongation factor S-II protein-like 8)	ENSMUSG00000051579
730	4.61719	491	27	Agap3	Arf-GAP, GTPase, ANK repeat and PH domain-containing protein 3 (AGAP-3)(Centaurin-gamma-3)(MR1-interacting protein)(MRIP-1)(CRAM-associated GTPase)(CRAG)	ENSMUSG00000023353
731	4.61538	380	3	Ank3	ankyrin 3, epithelial isoform b	ENSMUSG00000069601
732	4.61538	380	3	Vps4b	Vacuolar protein sorting-associating protein 4B (Suppressor of K(+) transport growth defect 1)(Protein SKD1)	ENSMUSG00000009907
733	4.61272	698	72	Ctss	Cathepsin S Precursor (EC 3.4.22.27)	ENSMUSG00000038642
734	4.60036	7532	1558	Hsd17b13	17-beta hydroxysteroid dehydrogenase 13 Precursor (EC 1.1.-.-)(Short-chain dehydrogenase/reductase 9)(Alcohol dehydrogenase PAN1B-like)	ENSMUSG00000034528
735	4.6	475	24	Rasa2	Ras GTPase-activating protein 2 (GAP1m)	ENSMUSG00000032413
736	4.59589	571	45	Dpysl2	Dihydropyrimidinase-related protein 2 (DRP-2)(ULIP 2 protein)	ENSMUSG00000022048
737	4.59236	621	56	B4galt3	Beta-1,4-galactosyltransferase 3 (Beta-1,4-GalTase 3)(Beta4Gal-T3)(b4Gal-T3)(EC 2.4.1.-)(UDP-galactose	ENSMUSG00000052423
738	4.58095	381	4	Rnf219	RING finger protein 219	ENSMUSG00000022120
739	4.57923	738	82	Ndufa12	NADH dehydrogenase	ENSMUSG00000020022
740	4.57422	1071	155	Sf3b5	Splicing factor 3B subunit 5 (SF3b5)(Pre-mRNA-splicing factor SF3b 10 kDa subunit)	ENSMUSG00000078348
741	4.57282	371	2	Gpr152	Probable G-protein coupled receptor 152	ENSMUSG00000044724
742	4.57068	773	90	Smc6	Structural maintenance of chromosomes protein 6 (mSMC6)	ENSMUSG00000020608
743	4.56667	1544	259	2310001A20Rik	Adipocyte plasma membrane-associated protein (Protein DD16)	ENSMUSG00000033096
744	4.56219	817	100	Sphk2	Sphingosine kinase 2 (SPK 2)(SK 2)(EC 2.7.1.91)	ENSMUSG00000057342
745	4.55862	561	44	Iqgap1	Ras GTPase-activating-like protein IQGAP1	ENSMUSG00000030536
746	4.55732	1331	213	Matr3	Matrin-3	ENSMUSG00000037236
747	4.55556	597	52	Fbxl17	F-box/LRR-repeat protein 17 Fragment (F-box and leucine-rich repeat protein 17)(F-box only protein 13)	ENSMUSG00000023965
748	4.5534	369	2	Cenpo	Centromere protein O (CENP-O)	ENSMUSG00000020652
749	4.5515	1270	200	Ap2a2	AP-2 complex subunit alpha-2 (Adapter-related protein complex 2 alpha-2 subunit)(Adaptor protein complex AP-2 subunit alpha-2)(Alpha2-adaptin)(Plasma membrane adaptor HA2/AP2 adaptin alpha C subunit)(Alpha-adaptin C)(Clathrin assembly protein complex 2 alpha-C large chain)(100 kDa coated vesicle protein C)	ENSMUSG00000002957
750	4.55046	396	8	Pbxip1	Pre-B-cell leukemia transcription factor-interacting protein 1 (Hematopoietic PBX-interacting protein)	ENSMUSG00000042613
751	4.55046	396	8	Rit1	GTP-binding protein Rit1 (Ras-like protein expressed in many tissues)(Ras-like without CAAX protein 1)	ENSMUSG00000028057
752	4.54777	614	56	Khdrbs1	KH domain-containing, RNA-binding, signal transduction-associated protein 1 (p21 Ras GTPase-activating protein-associated p62)(GAP-associated tyrosine phosphoprotein p62)(Src-associated in mitosis 68 kDa protein)(Sam68)(p68)	ENSMUSG00000028790
753	4.53465	358	0	Nutf2	Nuclear transport factor 2 (NTF-2)	ENSMUSG00000008450
754	4.52648	1353	220	Ktn1	Kinectin	ENSMUSG00000021843
755	4.51942	3624	723	Cyb5b	Cytochrome b5 type B Precursor (Cytochrome b5 outer mitochondrial membrane isoform)	ENSMUSG00000031924
756	4.51701	564	46	Agbl3	Cytosolic carboxypeptidase 3 (EC 3.4.17.-)(ATP/GTP-binding protein-like 3)	ENSMUSG00000038836
757	4.51572	618	58	Rab3ip	RAB3A-interacting protein (Rabin-3)(SSX2-interacting protein)	ENSMUSG00000064181
758	4.51173	3938	794	Capzb	F-actin-capping protein subunit beta (CapZ beta)	ENSMUSG00000028745
759	4.51034	554	44	Casc3	Protein CASC3 (Cancer susceptibility candidate gene 3 protein homolog)(Metastatic lymph node protein 51 homolog)(Protein MLN 51 homolog)(Protein barentsz)(Btz)	ENSMUSG00000078676
760	4.50962	369	3	Cgref1	Cell growth regulator with EF hand domain protein 1 (Cell growth regulatory gene 11 protein)	ENSMUSG00000029161
761	4.5	629	61	Fam82a2	Regulator of microtubule dynamics protein 3 (RMD-3)(mRMD-3)(Protein FAM82A2)(Protein FAM82C)	ENSMUSG00000070730
762	4.49618	489	30	Prkab2	5'-AMP-activated protein kinase subunit beta-2 (AMPK beta-2 chain)	ENSMUSG00000038205
763	4.49158	1234	196	Abcc2	Canalicular multispecific organic anion transporter 1 (ATP-binding cassette sub-family C member 2)	ENSMUSG00000025194
764	4.47603	2514	483	Ptp4a2	Protein tyrosine phosphatase type IVA 2 (EC 3.1.3.48)(Protein-tyrosine phosphatase 4a2)(Protein-tyrosine phosphatase of regenerating liver 2)(PRL-2)	ENSMUSG00000028788
765	4.47015	2296	435	Hgfac	Hepatocyte growth factor activator Precursor (HGF activator)(HGFA)(EC 3.4.21.-)	ENSMUSG00000029102
766	4.46715	512	36	Ugcgl1	UDP-glucose	ENSMUSG00000037470
767	4.45098	354	1	Fam102b	Protein FAM102B	ENSMUSG00000040339
768	4.45038	483	30	Xrcc6	ATP-dependent DNA helicase 2 subunit 1 (ATP-dependent DNA helicase II 70 kDa subunit)(Ku autoantigen protein p70 homolog)(Ku70)(CTC box-binding factor 75 kDa subunit)(CTCBF)(CTC75)(DNA repair protein XRCC6)	ENSMUSG00000022471
769	4.44915	425	17	Tox4	TOX high mobility group box family member 4 (Epidermal Langerhans cell protein LCP1)	ENSMUSG00000016831
770	4.44884	1248	202	Rb1cc1	RB1-inducible coiled-coil protein 1 (Coiled-coil-forming protein 1)(LaXp180 protein)	ENSMUSG00000025907
771	4.44776	496	33	Rnf113a1	ring finger protein 113A1	ENSMUSG00000036537
772	4.44615	2501	484	Fgd4	FYVE, RhoGEF and PH domain-containing protein 4 (Actin filament-binding protein frabin)(FGD1-related F-actin-binding protein)	ENSMUSG00000022788
773	4.44498	829	108	Stradb	STE20-related kinase adapter protein beta (STRAD beta)(Pseudokinase ALS2CR2)(Amyotrophic lateral sclerosis 2 chromosomal region candidate gene 2 protein homolog)(ILP-interacting protein homolog)(Polyploidy-associated protein kinase)	ENSMUSG00000026027
774	4.44118	353	1	2310061F22Rik	UPF0432 protein C16orf84 homolog	ENSMUSG00000049482
775	4.4368	2287	437	Hadhb	Trifunctional enzyme subunit beta, mitochondrial Precursor (TP-beta)	ENSMUSG00000059447
776	4.43636	632	64	Tpcn2	Two pore calcium channel protein 2 (Voltage-dependent calcium channel protein TPC2)	ENSMUSG00000048677
777	4.43452	645	67	Rsf1	remodeling and spacing factor 1	ENSMUSG00000035623
778	4.43066	507	36	Lass6	LAG1 longevity assurance homolog 6	ENSMUSG00000027035
779	4.42537	493	33	Sh3pxd2a	SH3 and PX domain-containing protein 2A (SH3 multiple domains protein 1)(Five SH3 domain-containing protein)	ENSMUSG00000053617
780	4.41284	381	8	AC154377.4-1	Zinc finger protein DZIP1 (DAZ-interacting protein 1 homolog)	ENSMUSG00000042156
781	4.39062	1586	283	Stau1	Double-stranded RNA-binding protein Staufen homolog 1	ENSMUSG00000039536
782	4.38835	352	2	Mtap7d3	MAP7 domain-containing protein 3	ENSMUSG00000067878
783	4.38835	804	105	Ralbp1	RalA-binding protein 1 (RalBP1)(Ral-interacting protein 1)(Dinitrophenyl S-glutathione ATPase)(DNP-SG ATPase)	ENSMUSG00000024096
784	4.38809	2037	386	Scoc	Short coiled-coil protein	ENSMUSG00000063253
785	4.37881	7090	1541	Sra1	Steroid receptor RNA activator 1 (Steroid receptor RNA activator protein)(SRAP)	ENSMUSG00000006050
786	4.37838	710	84	Itpr2	Inositol 1,4,5-trisphosphate receptor type 2 (Type 2 inositol 1,4,5-trisphosphate receptor)(Type 2 InsP3 receptor)(IP3 receptor isoform 2)(InsP3R2)(Inositol 1,4,5-trisphosphate type V receptor)	ENSMUSG00000030287
787	4.37838	386	10	Zbtb48	Zinc finger and BTB domain-containing protein 48 (Krueppel-related zinc finger protein 3)(Protein HKR3)	ENSMUSG00000028952
788	4.375	810	107	Lrtomt	Leucine-rich repeat-containing protein 51	ENSMUSG00000064307
789	4.37216	5868	1264	Gcsh	Glycine cleavage system H protein, mitochondrial Precursor	ENSMUSG00000034424
790	4.37195	617	63	Ap3d1	AP-3 complex subunit delta-1 (Adapter-related protein complex 3 subunit delta-1)(AP-3 complex subunit delta)(Delta-adaptin)(mBLVR1)	ENSMUSG00000020198
791	4.36842	398	13	Erbb2	Receptor tyrosine-protein kinase erbB-2 Precursor (EC 2.7.10.1)(p185erbB2)(C-erbB-2)(NEU proto-oncogene)(CD340 antigen)	ENSMUSG00000062312
792	4.36747	625	65	Cyfip1	Cytoplasmic FMR1-interacting protein 1 (Specifically Rac1-associated protein 1)(Sra-1)	ENSMUSG00000030447
793	4.3662	520	41	Spag9	C-jun-amino-terminal kinase-interacting protein 4 (JNK-interacting protein 4)(JIP-4)(JNK-associated leucine-zipper protein)(JLP)(Sperm-associated antigen 9)(Mitogen-activated protein kinase 8-interacting protein 4)(JNK/SAPK-associated protein 2)(JSAP2)	ENSMUSG00000020859
794	4.35556	684	79	Arhgap12	Rho GTPase-activating protein 12 (Rho-type GTPase-activating protein 12)	ENSMUSG00000041225
795	4.35115	1040	161	Tomm34	Mitochondrial import receptor subunit TOM34 (Translocase of outer membrane 34 kDa subunit)	ENSMUSG00000018322
796	4.34981	1044	162	Uhmk1	Serine/threonine-protein kinase Kist (EC 2.7.11.1)(Kinase interacting with stathmin)(U2AF homology motif kinase 1)	ENSMUSG00000026667
797	4.34965	522	42	Idh2	Isocitrate dehydrogenase	ENSMUSG00000030541
798	4.33962	360	5	Satb1	DNA-binding protein SATB1 (Special AT-rich sequence-binding protein 1)	ENSMUSG00000023927
799	4.33945	373	8	Tgif1	Homeobox protein TGIF1 (5'-TG-3'-interacting factor 1)	ENSMUSG00000047407
800	4.33636	377	9	Setd6	SET domain-containing protein 6	ENSMUSG00000031671
801	4.32955	662	75	Srpk2	Serine/threonine-protein kinase SRPK2 (EC 2.7.11.1)(Serine/arginine-rich protein-specific kinase 2)(SR-protein-specific kinase 2)(SFRS protein kinase 2)	ENSMUSG00000062604
802	4.32878	11631	2609	Sec11c	Signal peptidase complex catalytic subunit SEC11C (EC 3.4.-.-)(SEC11 homolog C)(SEC11-like protein 3)(Microsomal signal peptidase 21 kDa subunit)(SPase 21 kDa subunit)(SPC21)	ENSMUSG00000024516
803	4.32727	376	9	Rnf135	RING finger protein 135	ENSMUSG00000020707
804	4.3271	826	113	Arid4b	AT-rich interactive domain-containing protein 4B (ARID domain-containing protein 4B)(Histone deacetylase complex subunit SAP180)(180 kDa Sin3-associated polypeptide)(Sin3-associated polypeptide p180)	ENSMUSG00000039219
805	4.32474	739	93	Pvrl2	Poliovirus receptor-related protein 2 Precursor (Murine herpesvirus entry protein B)(mHveB)(Nectin-2)(Poliovirus receptor homolog)(CD112 antigen)	ENSMUSG00000062300
806	4.31884	496	37	Mpg	DNA-3-methyladenine glycosylase (EC 3.2.2.21)(3-methyladenine DNA glycosidase)(ADPG)(3-alkyladenine DNA glycosylase)(N-methylpurine-DNA glycosylase)	ENSMUSG00000020287
807	4.31514	3378	705	Surf4	Surfeit locus protein 4	ENSMUSG00000014867
808	4.30811	697	84	2810405J04Rik	Protein FAM98A	ENSMUSG00000002017
809	4.30693	335	0	4930458L03Rik	RIKEN cDNA 4930458L03	ENSMUSG00000056223
810	4.30469	451	27	Lass5	LAG1 longevity assurance homolog 5 (Translocating chain-associating membrane protein homolog 4)(TRAM homolog 4)	ENSMUSG00000023021
811	4.30392	339	1	Rsc1a1	Regulatory solute carrier protein family 1 member 1 (Transporter regulator RS1)(mRS1)(Regulatory subunit of SGLT1)	ENSMUSG00000040715
812	4.30303	610	64	Wipi1	WD repeat domain phosphoinositide-interacting protein 1 (WIPI-1)(WD40 repeat protein interacting with phosphoinositides of 49 kDa)(WIPI 49 kDa)	ENSMUSG00000041895
813	4.30172	399	15	Arhgef2	Rho guanine nucleotide exchange factor 2 (Guanine nucleotide exchange factor H1)(GEF-H1)(Lymphoid blast crisis-like 1)(LBC'S first cousin)(Oncogene LFC)(Rhobin)	ENSMUSG00000028059
814	4.29565	394	14	Ccdc93	Coiled-coil domain-containing protein 93	ENSMUSG00000026339
815	4.29487	570	55	Utrn	utrophin	ENSMUSG00000019820
816	4.29412	1871	358	3300001P08Rik	Cisplatin resistance-associated overexpressed protein	ENSMUSG00000020863
817	4.28571	650	74	Rap1a	Ras-related protein Rap-1A Precursor (Ras-related protein Krev-1)	ENSMUSG00000068798
818	4.27885	345	3	Ctrc	Chymotrypsin-C Precursor (EC 3.4.21.2)	ENSMUSG00000062478
819	4.27778	439	25	Aaas	Aladin (Adracalin)	ENSMUSG00000036678
820	4.27358	353	5	Ifngr2	interferon gamma receptor 2	ENSMUSG00000022965
821	4.2735	400	16	Abcc4	ATP-binding cassette, sub-family C (CFTR/MRP), member 4	ENSMUSG00000032849
822	4.27237	998	156	Cdc2l1	PITSLRE serine/threonine-protein kinase CDC2L1 (EC 2.7.11.22)(Cell division cycle 2-like protein kinase 1)(Galactosyltransferase-associated protein kinase p58/GTA)	ENSMUSG00000029062
823	4.25837	790	108	Dsg2	Desmoglein-2 Precursor	ENSMUSG00000044393
824	4.25564	466	32	Zfp608	Zinc finger protein 608	ENSMUSG00000052713
825	4.2549	334	1	Klc3	Kinesin light chain 3	ENSMUSG00000040714
826	4.2549	334	1	Slc7a9	B(0,+)-type amino acid transporter 1 (B(0,+)AT)(Glycoprotein-associated amino acid transporter b0,+AT1)(Solute carrier family 7 member 9)	ENSMUSG00000030492
827	4.25424	653	76	Glb1	Beta-galactosidase Precursor (EC 3.2.1.23)(Acid beta-galactosidase)(Lactase)	ENSMUSG00000045594
828	4.24684	571	57	Akap8l	A-kinase anchor protein 8-like (AKAP8-like protein)(Neighbor of A-kinase-anchoring protein 95)(Neighbor of AKAP95)	ENSMUSG00000002625
829	4.24597	953	147	Egln1	Egl nine homolog 1 (EC 1.14.11.-)(Hypoxia-inducible factor prolyl hydroxylase 2)(HIF-prolyl hydroxylase 2)(HIF-PH2)(HPH-2)(SM-20)	ENSMUSG00000031987
830	4.2439	422	22	Nfya	Nuclear transcription factor Y subunit alpha (Nuclear transcription factor Y subunit A)(NF-YA)(CAAT-box DNA-binding protein subunit A)	ENSMUSG00000023994
831	4.24348	388	14	Cyp1a1	Cytochrome P450 1A1 (EC 1.14.14.1)(CYPIA1)(P450-P1)	ENSMUSG00000032315
832	4.23585	349	5	Arg2	Arginase-2, mitochondrial Precursor (Arginase II)(EC 3.5.3.1)(Non-hepatic arginase)(Kidney-type arginase)	ENSMUSG00000021125
833	4.22951	416	21	Tspan33	Tetraspanin-33 (Tspan-33)(Proerythroblast new membrane)(Penumbra)(mPen)	ENSMUSG00000001763
834	4.22872	695	87	Ube3a	Ubiquitin-protein ligase E3A (EC 6.3.2.-)(Oncogenic protein-associated protein E6-AP)	ENSMUSG00000025326
835	4.21854	537	50	Pcdh1	protocadherin 1	ENSMUSG00000051375
836	4.21782	326	0	Tyrp1	5,6-dihydroxyindole-2-carboxylic acid oxidase Precursor (DHICA oxidase)(EC 1.14.18.-)(Tyrosinase-related protein 1)(TRP-1)(TRP1)(TRP)(Catalase B)(Brown locus protein)	ENSMUSG00000005994
837	4.21622	368	10	Grem2	Gremlin-2 Precursor (Cysteine knot superfamily 1, BMP antagonist 2)(Protein related to DAN and cerberus)	ENSMUSG00000050069
838	4.21591	642	75	Amz2	Archaemetzincin-2 (EC 3.-.-.-)(Archeobacterial metalloproteinase-like protein 2)	ENSMUSG00000020610
839	4.21546	1700	326	Aox1	Aldehyde oxidase (EC 1.2.3.1)(Retinal oxidase)	ENSMUSG00000063558
840	4.20349	623	71	8430410A17Rik	UPF0361 protein DC12 homolog	ENSMUSG00000030060
841	4.20301	459	32	Ubr7	Putative E3 ubiquitin-protein ligase UBR7 (EC 6.3.2.-)(N-recognin-7)	ENSMUSG00000041712
842	4.2	341	4	Plat	Tissue-type plasminogen activator Precursor (t-plasminogen activator)(t-PA)(tPA)(EC 3.4.21.68)	ENSMUSG00000031538
843	4.19945	1437	265	Zfp706	Zinc finger protein 706	ENSMUSG00000062397
844	4.19651	861	128	Rps4x	40S ribosomal protein S4, X isoform	ENSMUSG00000031320
845	4.19277	596	65	Plcb1	1-phosphatidylinositol-4,5-bisphosphate phosphodiesterase beta-1 (EC 3.1.4.11)(Phosphoinositide phospholipase C)(Phospholipase C-beta-1)(PLC-beta-1)(PLC-I)(PLC-154)	ENSMUSG00000051177
846	4.192	424	24	E430002G05Rik	Inactive serine protease RAMP Precursor (Regeneration-associated muscle protease homolog)	ENSMUSG00000027188
847	4.18868	344	5	Grit	Rho/Cdc42/Rac GTPase-activating protein RICS (p200RhoGAP)(p250GAP)(RhoGAP involved in the beta-catenin-N-cadherin and NMDA receptor signaling)(Brain-specific Rho GTPase-activating protein)(GAB-associated Cdc42/Rac GTPase-activating protein)(GC-GAP)	ENSMUSG00000041444
848	4.18812	323	0	Izumo1	Izumo sperm-egg fusion protein 1 Precursor (Sperm-specific protein izumo)	ENSMUSG00000064158
849	4.17403	1411	261	Mphosph8	M-phase phosphoprotein, mpp8	ENSMUSG00000079184
850	4.16766	596	66	D4Wsu114e	Invasion-inhibitory protein 45 (IIp45)	ENSMUSG00000029022
851	4.16374	612	70	Mapk9	Mitogen-activated protein kinase 9 (EC 2.7.11.24)(Stress-activated protein kinase JNK2)(c-Jun N-terminal kinase 2)	ENSMUSG00000020366
852	4.15504	436	28	Tmem25	Transmembrane protein 25 Precursor	ENSMUSG00000002032
853	4.14179	455	33	Brcc3	BRCA1/BRCA2-containing complex subunit 3	ENSMUSG00000031201
854	4.14089	1105	190	Pdcl3	Phosducin-like protein 3 (Viral IAP-associated factor 1)(VIAF-1)	ENSMUSG00000026078
855	4.13239	1367	254	Arl6ip5	PRA1 family protein 3 (ADP-ribosylation factor-like protein 6-interacting protein 5)(ARL-6-interacting protein 5)(Aip-5)(Glutamate transporter EAAC1-interacting protein)(GTRAP3-18)(Prenylated Rab acceptor protein 2)(Protein JWa)(Addicsin)	ENSMUSG00000035199
856	4.13158	371	13	Eif1ay	Eukaryotic translation initiation factor 1A, X-chromosomal (eIF-1A X isoform)(eIF-4C)	ENSMUSG00000067194
857	4.12804	7541	1750	667277	Complement C1r-B subcomponent Precursor (EC 3.4.21.41)(Complement component 1, r-B subcomponent)	ENSMUSG00000055172
858	4.12621	325	2	Wdr33	WD repeat domain 33	ENSMUSG00000024400
859	4.12134	885	138	Tmed10	Transmembrane emp24 domain-containing protein 10 Precursor (21 kDa transmembrane-trafficking protein)(Transmembrane protein Tmp21)	ENSMUSG00000021248
860	4.11881	316	0	Tas1r3	Taste receptor type 1 member 3 Precursor (Sweet taste receptor T1R3)(Saccharin preference protein)	ENSMUSG00000029072
861	4.11682	781	113	Stom	Erythrocyte band 7 integral membrane protein (Stomatin)(Protein 7.2b)	ENSMUSG00000026880
862	4.1157	398	20	Osgep	Probable O-sialoglycoprotein endopeptidase (mOsgep)(EC 3.4.24.57)	ENSMUSG00000006289
863	4.11281	2853	617	Sec16b	Protein transport protein Sec16B (Protein SEC16 homolog B)(Regucalcin gene promoter region-related protein p117)(RGPR-p117)(Leucine zipper transcription regulator 2)	ENSMUSG00000026589
864	4.11215	340	6	Arl13b	ADP-ribosylation factor-like protein 13B (ADP-ribosylation factor-like protein 2-like 1)(ARL2-like protein 1)	ENSMUSG00000022911
865	4.10827	1987	407	Ssr1	Translocon-associated protein subunit alpha Precursor (TRAP-alpha)(Signal sequence receptor subunit alpha)(SSR-alpha)	ENSMUSG00000021427
866	4.10632	1329	247	Cops7a	COP9 signalosome complex subunit 7a (Signalosome subunit 7a)(SGN7a)(JAB1-containing signalosome subunit 7a)	ENSMUSG00000030127
867	4.10294	737	103	Mkrn2	Makorin-2	ENSMUSG00000000439
868	4.09615	326	3	Zfp652	Zinc finger protein 652	ENSMUSG00000075595
869	4.09167	391	19	Spsb2	SPRY domain-containing SOCS box protein 2 (SSB-2)(Gene-rich cluster protein C9)	ENSMUSG00000038451
870	4.08966	493	44	Coro1c	Coronin-1C (Coronin-3)	ENSMUSG00000004530
871	4.0875	554	59	Upf2	UPF2 regulator of nonsense transcripts homolog	ENSMUSG00000043241
872	4.08024	3307	734	Srp72	signal recognition particle 72	ENSMUSG00000036323
873	4.07627	381	17	Zeb1	Zinc finger E-box-binding homeobox 1 (Transcription factor 8)(Zinc finger homeobox protein 1a)(MEB1)(Delta EF1)	ENSMUSG00000024238
874	4.06962	543	57	Wac	WW domain-containing adapter protein with coiled-coil	ENSMUSG00000024283
875	4.06612	392	20	Arhgap23	Rho GTPase-activating protein 23 (Rho-type GTPase-activating protein 23)	ENSMUSG00000049807
876	4.05607	334	6	Ankrd13c	Ankyrin repeat domain-containing protein 13C	ENSMUSG00000039988
877	4.05233	597	71	Clmn	Calmin (Calponin-like transmembrane domain protein)	ENSMUSG00000021097
878	4.05181	682	92	Fbxw7	F-box/WD repeat-containing protein 7 (F-box and WD-40 domain-containing protein 7)(F-box protein FBW7)(F-box protein Fbxw6)(F-box-WD40 repeat protein 6)(SEL-10)	ENSMUSG00000028086
879	4.04895	479	42	Gla	Alpha-galactosidase A Precursor (EC 3.2.1.22)(Alpha-D-galactoside galactohydrolase)(Alpha-D-galactosidase A)(Melibiase)	ENSMUSG00000031266
880	4.04673	333	6	1110008L16Rik	Mitochondrial ribonuclease P protein 3 Precursor (Mitochondrial RNase P protein 3)	ENSMUSG00000021023
881	4.03883	316	2	Ap1m1	AP-1 complex subunit mu-1 (Adaptor-related protein complex 1 mu-1 subunit)(Adaptor protein complex AP-1 mu-1 subunit)(Golgi adaptor HA1/AP1 adaptin mu-1 subunit)(Mu-adaptin 1)(AP-mu chain family member mu1A)(Mu1A-adaptin)(Clathrin assembly protein complex 1 medium chain 1)(Clathrin coat assembly protein AP47)(Clathrin coat-associated protein AP47)	ENSMUSG00000003033
882	4.03738	332	6	Dcdc2a	Doublecortin domain-containing protein 2	ENSMUSG00000035910
883	4.03704	445	34	Slc25a38	Solute carrier family 25 member 38	ENSMUSG00000032519
884	4.03448	368	15	Uhrf1bp1l	UHRF1-binding protein 1-like	ENSMUSG00000019951
885	4.0344	3418	771	Eif2s2	Eukaryotic translation initiation factor 2 subunit 2 (Eukaryotic translation initiation factor 2 subunit beta)(eIF-2-beta)	ENSMUSG00000074656
886	4.02419	399	23	Usp5	Ubiquitin carboxyl-terminal hydrolase 5 (EC 3.1.2.15)(Ubiquitin thioesterase 5)(Ubiquitin-specific-processing protease 5)(Deubiquitinating enzyme 5)(Isopeptidase T)	ENSMUSG00000038429
887	4.01869	330	6	Pfkl	6-phosphofructokinase, liver type (EC 2.7.1.11)(Phosphofructokinase 1)(Phosphohexokinase)(Phosphofructo-1-kinase isozyme B)(PFK-B)	ENSMUSG00000020277
888	4.01626	394	22	Steap1	Metalloreductase STEAP1 (EC 1.16.1.-)(Six-transmembrane epithelial antigen of prostate 1)	ENSMUSG00000015652
889	4.01571	667	90	Riok2	Serine/threonine-protein kinase RIO2 (RIO kinase 2)(EC 2.7.11.1)	ENSMUSG00000023846
890	4.00862	365	15	Narg1	NMDA receptor-regulated protein 1 (N-terminal acetyltransferase 1)(Protein tubedown-1)	ENSMUSG00000063273
891	4.00775	417	28	Fam161a	UPF0564 protein FAM161A	ENSMUSG00000049811
892	4.0069	481	44	Nucb2	Nucleobindin-2 Precursor (DNA-binding protein NEFA)	ENSMUSG00000030659
893	4	1120	204	G6pc	Glucose-6-phosphatase (G-6-Pase)(G6Pase)(EC 3.1.3.9)	ENSMUSG00000078650
894	4	948	161	Kpna1	Importin subunit alpha-1 (Karyopherin subunit alpha-1)(SRP1-beta)(RAG cohort protein 2)(Nucleoprotein interactor 1)(Importin alpha S1)	ENSMUSG00000022905
895	4	884	145	Rabep1	Rab GTPase-binding effector protein 1 (Rabaptin-5)(Rabaptin-5alpha)	ENSMUSG00000020817
896	3.99927	550300	137524	Apoc1	Apolipoprotein C-I Precursor (Apo-CI)(ApoC-I)	ENSMUSG00000040564
897	3.99438	611	77	Twistnb	DNA-directed RNA polymerase I subunit RPA43 (Twist neighbor protein)	ENSMUSG00000020561
898	3.99254	435	33	Ppic	Peptidyl-prolyl cis-trans isomerase C (PPIase)(Rotamase)(EC 5.2.1.8)(Cyclophilin C)	ENSMUSG00000024538
899	3.9901	303	0	EG633640	Transmembrane protein C5orf28 homolog	ENSMUSG00000074634
900	3.98817	1248	237	Rnf125	E3 ubiquitin-protein ligase RNF125 (EC 6.3.2.-)(RING finger protein 125)	ENSMUSG00000033107
901	3.9816	549	62	Lsm8	U6 snRNA-associated Sm-like protein LSm8	ENSMUSG00000044155
902	3.98095	318	4	Rab8b	Ras-related protein Rab-8B	ENSMUSG00000036943
903	3.98077	314	3	Ankrd37	Ankyrin repeat domain-containing protein 37	ENSMUSG00000050914
904	3.98004	1695	350	C1qbp	Complement component 1 Q subcomponent-binding protein, mitochondrial Precursor (Glycoprotein gC1qBP)(C1qBP)(GC1q-R protein)	ENSMUSG00000018446
905	3.97409	2201	478	Thoc7	THO complex subunit 7 homolog (Ngg1-interacting factor 3-like protein 1-binding protein 1)	ENSMUSG00000053453
906	3.97213	7026	1693	Tceb2	Transcription elongation factor B polypeptide 2 (RNA polymerase II transcription factor SIII subunit B)(SIII p18)(Elongin B)(EloB)(Elongin 18 kDa subunit)	ENSMUSG00000055839
907	3.97153	1016	180	Htatip2	Oxidoreductase HTATIP2 (EC 1.1.1.-)	ENSMUSG00000039745
908	3.97087	309	2	Elf5	ETS-related transcription factor Elf-5 (E74-like factor 5)	ENSMUSG00000027186
909	3.96648	610	78	Trim24	Transcription intermediary factor 1-alpha (TIF1-alpha)(Tripartite motif-containing protein 24)	ENSMUSG00000029833
910	3.95556	434	34	Arf6	ADP-ribosylation factor 6	ENSMUSG00000044147
911	3.94355	389	23	2410089E03Rik	Transmembrane protein ENSP00000382582 homolog	ENSMUSG00000039801
912	3.93452	1222	235	L3mbtl2	Lethal(3)malignant brain tumor-like 2 protein (L(3)mbt-like 2 protein)(H-l(3)mbt-like protein)	ENSMUSG00000022394
913	3.91667	323	7	Rnase6	Ribonuclease K6 Precursor (RNase K6)(EC 3.1.27.-)	ENSMUSG00000021880
914	3.91509	315	5	Wbp1	WW domain-binding protein 1 (WBP-1)	ENSMUSG00000030035
915	3.91453	358	16	Prmt7	Protein arginine N-methyltransferase 7 (EC 2.1.1.-)	ENSMUSG00000060098
916	3.91176	299	1	Ush1c	Harmonin (Usher syndrome type-1C protein homolog)(PDZ domain-containing protein)	ENSMUSG00000030838
917	3.91045	424	33	Ik	Protein Red (Protein RER)(IK factor)(Cytokine IK)	ENSMUSG00000024474
918	3.90814	1389	280	Spg20	Spartin	ENSMUSG00000036580
919	3.90291	302	2	Adcyap1r1	Pituitary adenylate cyclase-activating polypeptide type I receptor Precursor (PACAP type I receptor)(PACAP-R-1)	ENSMUSG00000029778
920	3.9	2903	669	March6	E3 ubiquitin-protein ligase MARCH6 (EC 6.3.2.-)(Membrane-associated RING finger protein 6)(Membrane-associated RING-CH protein VI)(MARCH-VI)	ENSMUSG00000039100
921	3.89062	647	91	Tgs1	Trimethylguanosine synthase homolog (EC 2.1.1.-)(Nuclear receptor coactivator 6-interacting protein)(PRIP-interacting protein with methyltransferase motif)(PIPMT)(PIMT)	ENSMUSG00000028233
922	3.88983	359	17	Ttc21b	Tetratricopeptide repeat protein 21B (TPR repeat protein 21B)(Tetratricopeptide repeat-containing hedgehog modulator 1)	ENSMUSG00000034848
923	3.88636	413	31	Rasgef1b	Ras-GEF domain-containing family member 1B (GPI gamma-4)	ENSMUSG00000029333
924	3.88479	743	116	2900064A13Rik	UPF0480 protein C15orf24 homolog Precursor	ENSMUSG00000055943
925	3.88	676	99	Sdc3	Syndecan-3 Precursor (SYND3)	ENSMUSG00000025743
926	3.87931	350	15	Flot2	Flotillin-2 (Epidermal surface antigen)(ESA)	ENSMUSG00000061981
927	3.87719	342	13	Ttc15	Tetratricopeptide repeat protein 15 (TPR repeat protein 15)	ENSMUSG00000020628
928	3.87591	431	36	Nvl	Nuclear valosin-containing protein-like (Nuclear VCP-like protein)(NVLp)	ENSMUSG00000026516
929	3.8744	702	106	Dnajc16	DnaJ homolog subfamily C member 16 Precursor	ENSMUSG00000040697
930	3.86979	643	91	Tsn	Translin	ENSMUSG00000026374
931	3.8662	449	41	Klhl20	Kelch-like protein 20 (Kelch-like ECT2-interacting protein)	ENSMUSG00000026705
932	3.86408	298	2	Evc2	Limbin	ENSMUSG00000050248
933	3.86195	1047	196	Sypl	Synaptophysin-like protein 1 (Pantophysin)	ENSMUSG00000020570
934	3.85504	1469	306	Dynlt1c	Dynein light chain Tctex-type 1 (T-complex testis-specific protein 1)(TCTEX-1)	ENSMUSG00000000579
935	3.85375	875	152	Ythdc1	YTH domain containing 1	ENSMUSG00000035851
936	3.85194	3178	750	Nadk	NAD kinase (EC 2.7.1.23)(Poly(P)/ATP NAD kinase)	ENSMUSG00000029063
937	3.85106	443	40	Tax1bp3	Tax1-binding protein 3 (Tax interaction protein 1)(TIP-1)	ENSMUSG00000040158
938	3.84615	300	3	Fbxw4	F-box/WD repeat-containing protein 4 (F-box and WD-40 domain-containing protein 4)(Protein hagoromo)	ENSMUSG00000040913
939	3.84541	1492	313	Thoc2	THO complex subunit 2	ENSMUSG00000037475
940	3.84507	446	41	Hnf1a	Hepatocyte nuclear factor 1-alpha (HNF-1A)(Liver-specific transcription factor LF-B1)(LFB1)	ENSMUSG00000029556
941	3.84112	311	6	Ace2	Angiotensin-converting enzyme 2 Precursor (EC 3.4.17.-)(ACE-related carboxypeptidase)	ENSMUSG00000015405
942	3.83824	1205	239	Mrpl44	39S ribosomal protein L44, mitochondrial Precursor (L44mt)(EC 3.1.26.-)(MRP-L44)	ENSMUSG00000026248
943	3.83775	1059	201	Ep300	E1A binding protein p300	ENSMUSG00000055024
944	3.83636	322	9	Wdr51a	WD repeat-containing protein 51A	ENSMUSG00000023345
945	3.83495	295	2	Eftud1	Elongation factor Tu GTP-binding domain-containing protein 1	ENSMUSG00000038563
946	3.82412	661	98	Cenpq	Centromere protein Q (CENP-Q)	ENSMUSG00000023919
947	3.82209	523	62	Lrrfip2	Leucine-rich repeat flightless-interacting protein 2 (LRR FLII-interacting protein 2)	ENSMUSG00000032497
948	3.8209	924	167	Ctbs	Di-N-acetylchitobiase Precursor (EC 3.2.1.-)	ENSMUSG00000028189
949	3.82051	794	133	Pik3r1	Phosphatidylinositol 3-kinase regulatory subunit alpha (PI3-kinase p85 subunit alpha)(PtdIns-3-kinase p85-alpha)(PI3K)	ENSMUSG00000041417
950	3.82022	580	77	Adipor1	Adiponectin receptor protein 1	ENSMUSG00000026457
951	3.8191	660	98	Lmo7	LIM domain only 7	ENSMUSG00000033060
952	3.81176	872	154	Atp6v1c1	V-type proton ATPase subunit C 1 (V-ATPase subunit C 1)(Vacuolar proton pump subunit C 1)	ENSMUSG00000022295
953	3.80875	2947	699	Hsdl2	Hydroxysteroid dehydrogenase-like protein 2 (EC 1.-.-.-)	ENSMUSG00000028383
954	3.8042	444	42	Mrps6	28S ribosomal protein S6, mitochondrial (S6mt)(MRP-S6)	ENSMUSG00000039680
955	3.80313	3300	793	1810020D17Rik	UPF0366 protein C11orf67 homolog	ENSMUSG00000035642
956	3.80282	440	41	Cox11	Cytochrome c oxidase assembly protein COX11, mitochondrial Precursor	ENSMUSG00000020544
957	3.79904	694	108	2310007F21Rik	Alpha- and gamma-adaptin-binding protein p34	ENSMUSG00000037257
958	3.79888	1260	257	Commd7	COMM domain-containing protein 7	ENSMUSG00000056941
959	3.7957	959	178	Cetn3	Centrin-3	ENSMUSG00000021537
960	3.7931	340	15	Prkca	Protein kinase C alpha type (PKC-alpha)(PKC-A)(EC 2.7.11.13)	ENSMUSG00000050965
961	3.792	374	24	Tmem97	Transmembrane protein 97	ENSMUSG00000037278
962	3.7918	1102	216	Lgals4	Galectin-4 (Lactose-binding lectin 4)	ENSMUSG00000053964
963	3.79104	662	100	Ash1l	Probable histone-lysine N-methyltransferase ASH1L (EC 2.1.1.43)(Absent small and homeotic disks protein 1 homolog)(ASH1-like protein)	ENSMUSG00000028053
964	3.78673	699	110	Ard1a	N-terminal acetyltransferase complex ARD1 subunit homolog A (EC 2.3.1.88)(EC 2.3.1.-)	ENSMUSG00000031388
965	3.77928	739	121	Daxx	Death domain-associated protein 6 (Daxx)	ENSMUSG00000002307
966	3.77876	327	12	Tead1	Transcriptional enhancer factor TEF-1 (TEA domain family member 1)(TEAD-1)(Protein GT-IIC)(Transcription factor 13)(NTEF-1)	ENSMUSG00000055320
967	3.77358	500	58	Gnl3l	Guanine nucleotide-binding protein-like 3-like protein	ENSMUSG00000025266
968	3.76882	601	85	Xpo5	Exportin-5 (Exp5)(Ran-binding protein 21)	ENSMUSG00000067150
969	3.76842	1690	374	Vps29	Vacuolar protein sorting-associated protein 29 (EC 3.1.3.3)(Vesicle protein sorting 29)	ENSMUSG00000029462
970	3.75833	351	19	Xab2	Pre-mRNA-splicing factor SYF1 (XPA-binding protein 2)	ENSMUSG00000019470
971	3.75694	441	43	Hspa4l	Heat shock 70 kDa protein 4L (Osmotic stress protein 94)(Heat shock 70-related protein APG-1)	ENSMUSG00000025757
972	3.75497	467	50	Gpatch4	G patch domain-containing protein 4	ENSMUSG00000028069
973	3.75229	309	8	Foxn3	Forkhead box protein N3 (Checkpoint suppressor 1)	ENSMUSG00000033713
974	3.75179	1472	318	Acaa2	3-ketoacyl-CoA thiolase, mitochondrial (EC 2.3.1.16)(Beta-ketothiolase)(Acetyl-CoA acyltransferase)(Mitochondrial 3-oxoacyl-CoA thiolase)	ENSMUSG00000036880
975	3.74874	2138	496	Nfib	Nuclear factor 1 B-type (Nuclear factor 1/B)(NF1-B)(NFI-B)(NF-I/B)(CCAAT-box-binding transcription factor)(CTF)(TGGCA-binding protein)	ENSMUSG00000008575
976	3.74554	739	123	Fam160b1	UPF0518 protein FAM160B1	ENSMUSG00000033478
977	3.74359	1652	367	Ptplad1	Protein tyrosine phosphatase-like protein PTPLAD1 (Protein-tyrosine phosphatase-like A domain-containing protein 1)(Butyrate-induced protein 1)(B-ind1)	ENSMUSG00000033629
978	3.74182	929	174	Phb2	Prohibitin-2 (B-cell receptor-associated protein BAP37)(Repressor of estrogen receptor activity)	ENSMUSG00000004264
979	3.73988	547	72	Brp16	Brain protein 16	ENSMUSG00000022554
980	3.73729	341	17	Gpnmb	Transmembrane glycoprotein NMB Precursor (Dendritic cell-associated transmembrane protein)(DC-HIL)	ENSMUSG00000029816
981	3.73469	998	193	Rbp1	Retinol-binding protein 1 (Cellular retinol-binding protein I)(CRBP-I)(mCRBPI)(Cellular retinol-binding protein)(CRBP)	ENSMUSG00000046402
982	3.73082	2672	642	Tgoln2	Trans-Golgi network integral membrane protein 1 Precursor (TGN38A)	ENSMUSG00000056429
983	3.72936	1526	335	Ythdf2	high glucose-regulated protein 8	ENSMUSG00000040025
984	3.72881	340	17	Cul7	Cullin-7 (CUL-7)(p185)(p193)	ENSMUSG00000038545
985	3.72816	284	2	Gpr162	Probable G-protein coupled receptor 162	ENSMUSG00000038390
986	3.72222	302	7	Smyd3	SET and MYND domain-containing protein 3 (EC 2.1.1.43)(Zinc finger MYND domain-containing protein 1)	ENSMUSG00000055067
987	3.71875	376	27	Trp53i13	Tumor protein p53-inducible protein 13 Precursor	ENSMUSG00000044328
988	3.70311	3118	768	Ikbkb	Inhibitor of nuclear factor kappa-B kinase subunit beta (I-kappa-B-kinase beta)(IkBKB)(IKK-beta)(IKK-B)(EC 2.7.11.10)(I-kappa-B kinase 2)(IKK2)(Nuclear factor NF-kappa-B inhibitor kinase beta)(NFKBIKB)	ENSMUSG00000031537
989	3.69942	540	72	Zc3h13	RIKEN cDNA 3110050K21	ENSMUSG00000022000
990	3.69714	547	74	Dab2	Disabled homolog 2 (DOC-2)(Mitogen-responsive phosphoprotein)	ENSMUSG00000022150
991	3.69565	2790	681	Galm	Aldose 1-epimerase (EC 5.1.3.3)(Galactose mutarotase)	ENSMUSG00000035473
992	3.6917	834	152	Rbm26	RNA-binding protein 26 (RNA-binding motif protein 26)	ENSMUSG00000022119
993	3.69118	402	35	Dnajb12	DnaJ homolog subfamily B member 12 (mDJ10)	ENSMUSG00000020109
994	3.68966	435	44	Cadps2	Calcium-dependent secretion activator 2 (Calcium-dependent activator protein for secretion 2)(CAPS-2)	ENSMUSG00000017978
995	3.68814	988	194	Calm3	Calmodulin (CaM)	ENSMUSG00000019370
996	3.68304	725	123	Btbd1	BTB/POZ domain-containing protein 1 (Glucose signal-repressing protein)	ENSMUSG00000025103
997	3.67327	271	0	AC107815.11	BET1-like protein (Vesicle transport protein GOS15)(Golgi SNARE with a size of 15 kDa)(GOS-15)(GS15)	ENSMUSG00000080136
998	3.6729	293	6	Ube2f	NEDD8-conjugating enzyme UBE2F (EC 6.3.2.-)(Ubiquitin-conjugating enzyme E2 F)(NEDD8 protein ligase UBE2F)(NEDD8 carrier protein UBE2F)	ENSMUSG00000059301
999	3.67241	539	73	Cbx5	Chromobox protein homolog 5 (Heterochromatin protein 1 homolog alpha)(HP1 alpha)	ENSMUSG00000009575
1000	3.6699	278	2	Mtrf1l	Peptide chain release factor 1-like, mitochondrial Precursor (Mitochondrial translational release factor 1-like)	ENSMUSG00000019774
1001	3.66986	667	108	1700023B02Rik	CBF1-interacting corepressor	ENSMUSG00000041777
1002	3.66897	432	44	Rfc1	Replication factor C subunit 1 (Activator 1 subunit 1)(Replication factor C large subunit)(RF-C 140 kDa subunit)(Activator 1 140 kDa subunit)(A1 140 kDa subunit)(Activator 1 large subunit)(A1-P145)(Differentiation-specific element-binding protein)(ISRE-binding protein)	ENSMUSG00000029191
1003	3.66102	764	135	Slc30a1	Zinc transporter 1 (ZnT-1)(Solute carrier family 30 member 1)	ENSMUSG00000037434
1004	3.65812	756	133	Strbp	Spermatid perinuclear RNA-binding protein	ENSMUSG00000026915
1005	3.6574	4768	1230	Cyc1	Cytochrome c1, heme protein, mitochondrial Precursor (Ubiquinol-cytochrome-c reductase complex cytochrome c1 subunit)(Cytochrome c-1)(Cytochrome b-c1 complex subunit 4)(Complex III subunit 4)(Complex III subunit IV)	ENSMUSG00000022551
1006	3.65696	1030	208	Nol11	Nucleolar protein 11	ENSMUSG00000018433
1007	3.65693	401	36	Mum1	Mutated melanoma-associated antigen 1 (Protein MUM-1)	ENSMUSG00000020156
1008	3.65685	14681	3941	Rpl15	60S ribosomal protein L15	ENSMUSG00000012405
1009	3.64906	867	164	Pycr2	Pyrroline-5-carboxylate reductase 2 (P5C reductase 2)(P5CR 2)(EC 1.5.1.2)	ENSMUSG00000026520
1010	3.6449	793	144	Vrk3	Serine/threonine-protein kinase VRK3 (EC 2.7.11.1)(Vaccinia-related kinase 3)	ENSMUSG00000002205
1011	3.64479	844	158	Atpaf2	ATP synthase mitochondrial F1 complex assembly factor 2 Precursor	ENSMUSG00000042709
1012	3.63563	798	146	Dmap1	DNA methyltransferase 1-associated protein 1 (DNMT1-associated protein 1)(DNMAP1)(MAT1-mediated transcriptional repressor)	ENSMUSG00000009640
1013	3.63366	267	0	Gabrg3	Gamma-aminobutyric acid receptor subunit gamma-3 Precursor (GABA(A) receptor subunit gamma-3)	ENSMUSG00000055026
1014	3.62847	945	187	Fndc3b	Fibronectin type III domain-containing protein 3B (Factor for adipocyte differentiation 104)(HCV NS5A-binding protein 37)	ENSMUSG00000039286
1015	3.62688	2787	695	Fis1	Mitochondrial fission 1 protein (Fis1 homolog)(Tetratricopeptide repeat protein 11)(TPR repeat protein 11)	ENSMUSG00000019054
1016	3.62376	266	0	OTTMUSG00000008561	UPF0632 protein A Precursor	ENSMUSG00000070867
1017	3.62025	472	57	Wdr68	WD repeat-containing protein 68 (WD repeat-containing protein An11 homolog)	ENSMUSG00000049354
1018	3.61963	490	62	Pcnxl3	Pecanex-like protein 3	ENSMUSG00000054874
1019	3.61446	500	65	Wdr3	WD repeat-containing protein 3	ENSMUSG00000033285
1020	3.61202	1222	265	Rai14	Ankycorbin (Ankyrin repeat and coiled-coil structure-containing protein)(Retinoic acid-induced protein 14)(Novel retinal pigment epithelial cell protein)(p125)	ENSMUSG00000022246
1021	3.61151	402	38	Specc1l	Cytospin-A (SPECC1-like protein)	ENSMUSG00000033444
1022	3.6114	3385	864	Gnb2	Guanine nucleotide-binding protein G(I)/G(S)/G(T) subunit beta-2 (Transducin beta chain 2)(G protein subunit beta-2)	ENSMUSG00000029713
1023	3.60284	408	40	Foxred1	FAD-dependent oxidoreductase domain-containing protein 1	ENSMUSG00000039048
1024	3.59804	267	1	Ascl2	Achaete-scute homolog 2 (Mash-2)	ENSMUSG00000009248
1025	3.59406	263	0	Sytl1	Synaptotagmin-like protein 1 (Exophilin-7)	ENSMUSG00000028860
1026	3.59004	1774	421	Ctdsp1	Carboxy-terminal domain RNA polymerase II polypeptide A small phosphatase 1 (EC 3.1.3.16)(Nuclear LIM interactor-interacting factor 3)(NLI-interacting factor 3)(Golli-interacting protein)(GIP)	ENSMUSG00000026176
1027	3.58871	790	147	App	Amyloid beta A4 protein Precursor (Alzheimer disease amyloid A4 protein homolog)(ABPP)(APP)(Amyloidogenic glycoprotein)(AG)	ENSMUSG00000022892
1028	3.58579	3432	884	Ech1	Delta(3,5)-Delta(2,4)-dienoyl-CoA isomerase, mitochondrial Precursor (EC 5.3.3.-)	ENSMUSG00000053898
1029	3.58523	531	75	Daglb	Sn1-specific diacylglycerol lipase beta (DGL-beta)(EC 3.1.1.-)	ENSMUSG00000039206
1030	3.58036	702	123	Dctn5	Dynactin subunit 5 (Dynactin subunit p25)	ENSMUSG00000030868
1031	3.57724	340	22	Tdrkh	Tudor and KH domain-containing protein	ENSMUSG00000041912
1032	3.57018	307	13	Hunk	Hormonally up-regulated neu tumor-associated kinase (EC 2.7.11.1)(Serine/threonine-protein kinase MAK-V)	ENSMUSG00000053414
1033	3.57016	16030	4417	Rpl31	60S ribosomal protein L31	ENSMUSG00000073702
1034	3.56962	464	57	Vat1	Synaptic vesicle membrane protein VAT-1 homolog (EC 1.-.-.-)	ENSMUSG00000034993
1035	3.56107	833	161	Cpeb3	Cytoplasmic polyadenylation element-binding protein 3 (CPE-binding protein 3)(CPE-BP3)(mCPEB-3)	ENSMUSG00000039652
1036	3.56028	1908	463	Eif4g2	Eukaryotic translation initiation factor 4 gamma 2 (eIF-4-gamma 2)(eIF-4G 2)(eIF4G 2)(p97)(Novel APOBEC-1 target 1)(Translation repressor NAT1)	ENSMUSG00000005610
1037	3.55963	288	8	Eml5	Echinoderm microtubule-associated protein-like 5 (EMAP-5)	ENSMUSG00000051166
1038	3.55862	416	44	Brd4	Bromodomain-containing protein 4 (Mitotic chromosome-associated protein)(MCAP)	ENSMUSG00000024002
1039	3.55625	469	59	Vps26a	Vacuolar protein sorting-associated protein 26A (Vesicle protein sorting 26A)(mVPS26)(H<beta>58 protein)(H beta 58)	ENSMUSG00000020078
1040	3.55556	828	160	Rai12	Dermal papilla-derived protein 6 homolog (Retinoic acid-induced protein 12)	ENSMUSG00000018565
1041	3.55526	1219	270	5730494N06Rik	UPF0414 transmembrane protein C20orf30 homolog	ENSMUSG00000027341
1042	3.55383	3333	865	Eif4b	Eukaryotic translation initiation factor 4B (eIF-4B)	ENSMUSG00000058655
1043	3.54864	812	156	Tm6sf2	Transmembrane 6 superfamily member 2	ENSMUSG00000036151
1044	3.54762	347	25	Scyl2	SCY1-like protein 2 (Coated vesicle-associated kinase of 104 kDa)	ENSMUSG00000069539
1045	3.54472	336	22	Mrpl54	39S ribosomal protein L54, mitochondrial Precursor (L54mt)(MRP-L54)	ENSMUSG00000034932
1046	3.54348	389	37	Ccdc55	Coiled-coil domain-containing protein 55	ENSMUSG00000037958
1047	3.54113	718	130	Utp6	U3 small nucleolar RNA-associated protein 6 homolog (Multiple hat domains protein)	ENSMUSG00000035575
1048	3.53979	923	188	2700029M09Rik	UPF0609 protein C4orf27 homolog	ENSMUSG00000038005
1049	3.53953	661	114	Ppp1cc	Serine/threonine-protein phosphatase PP1-gamma catalytic subunit (PP-1G)(EC 3.1.3.16)(Protein phosphatase 1C catalytic subunit)	ENSMUSG00000004455
1050	3.53896	445	53	Fam40b	Protein FAM40B	ENSMUSG00000039629
1051	3.53789	16613	4623	Mosc2	MOSC domain-containing protein 2, mitochondrial Precursor (EC 1.-.-.-)	ENSMUSG00000073481
1052	3.5375	749	139	Qars	glutaminyl-tRNA synthetase	ENSMUSG00000032604
1053	3.53631	533	78	Sdpr	Serum deprivation-response protein (Phosphatidylserine-binding protein)	ENSMUSG00000045954
1054	3.53623	632	106	Med13	Mediator of RNA polymerase II transcription subunit 13 (Thyroid hormone receptor-associated protein complex 240 kDa component)(Trap240)(Thyroid hormone receptor-associated protein 1)	ENSMUSG00000034297
1055	3.53079	1104	240	2010011I20Rik	Transmembrane protein C20orf108 homolog	ENSMUSG00000027495
1056	3.52482	397	40	Tnrc6a	trinucleotide repeat containing 6A	ENSMUSG00000052707
1057	3.52336	277	6	5730410E15Rik	Syntabulin (Syntaxin-1-binding protein)(Golgi-localized syntaphilin-related protein)(m-Golsyn)	ENSMUSG00000022340
1058	3.52201	460	58	Grm1	Metabotropic glutamate receptor 1 Precursor (mGluR1)	ENSMUSG00000019828
1059	3.52113	400	41	Hip1r	Huntingtin-interacting protein 1-related protein (Hip1-related)	ENSMUSG00000000915
1060	3.51237	894	182	6330409N04Rik	Chronic lymphocytic leukemia deletion region gene 6 protein homolog (CLL deletion region gene 6 protein homolog)	ENSMUSG00000021930
1061	3.50847	314	17	Lepr	Leptin receptor Precursor (LEP-R)(OB receptor)(OB-R)(B219)(CD295 antigen)	ENSMUSG00000057722
1062	3.50481	629	107	Skiv2l2	Superkiller viralicidic activity 2-like 2 (EC 3.6.1.-)(ATP-dependent helicase SKIV2L2)	ENSMUSG00000016018
1063	3.5	264	3	Klhdc1	Kelch domain-containing protein 1	ENSMUSG00000051890
1064	3.49735	561	88	Deb1	SS18-like protein 2	ENSMUSG00000032526
1065	3.49533	274	6	Rccd1	RCC1 domain-containing protein 1	ENSMUSG00000038930
1066	3.49515	260	2	Pde1b	Calcium/calmodulin-dependent 3',5'-cyclic nucleotide phosphodiesterase 1B (Cam-PDE 1B)(EC 3.1.4.17)(63 kDa Cam-PDE)	ENSMUSG00000022489
1067	3.49206	340	25	Cd93	Complement component C1q receptor Precursor (Complement component 1 q subcomponent receptor 1)(C1q/MBL/SPA receptor)(C1qR(p))(C1qRp)(Cell surface antigen AA4)(Lymphocyte antigen 68)(Ly-68)(CD93 antigen)	ENSMUSG00000027435
1068	3.48993	940	197	Pno1	RNA-binding protein PNO1	ENSMUSG00000020116
1069	3.48101	450	57	Rnf139	RING finger protein 139	ENSMUSG00000037075
1070	3.47963	2548	660	Shfm1	26S proteasome complex subunit DSS1 (Split hand/foot malformation type 1 protein homolog)(Deleted in split hand/split foot protein 1 homolog)(Split hand/foot deleted protein 1 homolog)	ENSMUSG00000042541
1071	3.47923	989	212	Wipi2	WD repeat domain phosphoinositide-interacting protein 2 (WIPI-2)	ENSMUSG00000029578
1072	3.47917	401	43	Nr2f1	COUP transcription factor 1 (COUP-TF I)(COUP-TF1)(Nuclear receptor subfamily 2 group F member 1)(V-ERBA-related protein EAR-3)	ENSMUSG00000069171
1073	3.47525	251	0	Adam22	ADAM 22 Precursor (A disintegrin and metalloproteinase domain 22)	ENSMUSG00000040537
1074	3.47482	383	38	Urm1	Ubiquitin-related modifier 1 homolog	ENSMUSG00000069020
1075	3.47347	751	144	Fam167b	UPF0484 protein FAM167B (Protein SEC)	ENSMUSG00000050493
1076	3.47122	1528	368	Bclaf1	Bcl-2-associated transcription factor 1 (Btf)	ENSMUSG00000037608
1077	3.47059	431	52	Syncrip	Heterogeneous nuclear ribonucleoprotein Q (hnRNP Q)(hnRNP-Q)(Synaptotagmin-binding, cytoplasmic RNA-interacting protein)(Glycine- and tyrosine-rich RNA-binding protein)(GRY-RBP)(NS1-associated protein 1)(pp68)	ENSMUSG00000032423
1078	3.46809	389	40	Fbxo3	F-box only protein 3	ENSMUSG00000027180
1079	3.46535	250	0	Angptl4	Angiopoietin-related protein 4 Precursor (Angiopoietin-like 4)(Hepatic fibrinogen/angiopoietin-related protein)(HFARP)(Fasting-induced adipose factor)(Secreted protein Bk89)(425O18-1)	ENSMUSG00000002289
1080	3.46507	4661	1273	Gyk	Glycerol kinase (EC 2.7.1.30)(ATP	ENSMUSG00000025059
1081	3.46473	735	140	Commd1	COMM domain-containing protein 1 (Protein Murr1)	ENSMUSG00000051355
1082	3.46468	832	168	Ercc5	DNA repair protein complementing XP-G cells homolog (Xeroderma pigmentosum group G-complementing protein homolog)(DNA excision repair protein ERCC-5)	ENSMUSG00000026048
1083	3.46429	288	11	Mesdc2	Mesoderm development candidate 2	ENSMUSG00000038503
1084	3.46392	572	93	Anxa11	Annexin A11 (Annexin-11)(Annexin XI)(Calcyclin-associated annexin 50)(CAP-50)	ENSMUSG00000021866
1085	3.45402	501	73	4930506M07Rik	Shootin-1	ENSMUSG00000041362
1086	3.45392	1924	485	Slc2a2	Solute carrier family 2, facilitated glucose transporter member 2 (Glucose transporter type 2, liver)(GLUT-2)	ENSMUSG00000027690
1087	3.45	314	19	Tmem65	Transmembrane protein 65	ENSMUSG00000062373
1088	3.45	314	19	Rg9mtd2	RNA (guanine-9-)-methyltransferase domain-containing protein 2 (EC 2.1.1.-)	ENSMUSG00000004127
1089	3.44906	814	164	Klhl22	Kelch-like protein 22	ENSMUSG00000022750
1090	3.44643	479	67	Enpp4	Ectonucleotide pyrophosphatase/phosphodiesterase family member 4 Precursor (E-NPP4)(NPP-4)(EC 3.1.-.-)	ENSMUSG00000023961
1091	3.44337	6649	1859	Hpd	4-hydroxyphenylpyruvate dioxygenase (EC 1.13.11.27)(4-hydroxyphenylpyruvic acid oxidase)(HPPDase)(4HPPD)(HPD)(F Alloantigen)(F protein)	ENSMUSG00000029445
1092	3.44248	289	12	Faf1	FAS-associated factor 1	ENSMUSG00000010517
1093	3.44176	1466	354	Wdr74	WD repeat-containing protein 74	ENSMUSG00000042729
1094	3.43902	323	22	Slc25a26	S-adenosylmethionine mitochondrial carrier protein (Mitochondrial S-adenosylmethionine transporter)(Solute carrier family 25 member 26)	ENSMUSG00000045100
1095	3.4381	261	4	1190002A17Rik	Putative adenylate kinase-like protein C9orf98 homolog (EC 2.7.4.3)	ENSMUSG00000026807
1096	3.43564	247	0	Oprd1	Delta-type opioid receptor (DOR-1)(K56)(MSL-2)	ENSMUSG00000050511
1097	3.43548	326	23	Stxbp3a	Syntaxin-binding protein 3 (Unc-18 homolog 3)(Unc-18C)(MUNC-18-3)	ENSMUSG00000027882
1098	3.43386	549	88	Bccip	BRCA2 and CDKN1A-interacting protein	ENSMUSG00000030983
1099	3.43151	401	45	Nfrkb	Nuclear factor related to kappa-B-binding protein (DNA-binding protein R kappa-B)	ENSMUSG00000042185
1100	3.42857	260	4	Mgrn1	Probable E3 ubiquitin-protein ligase MGRN1 (EC 6.3.2.-)(Mahogunin RING finger protein 1)	ENSMUSG00000022517
1101	3.42411	2201	571	Gltpd2	Glycolipid transfer protein domain-containing protein 2	ENSMUSG00000046811
1102	3.41509	443	58	Ddx20	Probable ATP-dependent RNA helicase DDX20 (EC 3.6.1.-)(DEAD box protein 20)(DEAD box protein DP 103)(Component of gems 3)(Gemin-3)(Regulator of steroidogenic factor 1)(ROSF-1)	ENSMUSG00000027905
1103	3.41346	255	3	EG640370	Putative uncharacterized protein Fragment	ENSMUSG00000072829
1104	3.41325	982	216	Fahd2a	Fumarylacetoacetate hydrolase domain-containing protein 2A (EC 3.-.-.-)	ENSMUSG00000027371
1105	3.41322	313	20	Neurl2	Neuralized-like protein 2	ENSMUSG00000039873
1106	3.41176	306	18	Rab40b	Ras-related protein Rab-40B (SOCS box-containing protein RAR)	ENSMUSG00000025170
1107	3.40952	258	4	Hic2	Hypermethylated in cancer 2 protein (Hic-2)	ENSMUSG00000050240
1108	3.40936	2815	754	Slc39a14	Zinc transporter ZIP14 (Zrt- and Irt-like protein 14)(ZIP-14)(Solute carrier family 39 member 14)(Factor for adipocyte differentiation 123)(FAD-123)	ENSMUSG00000022094
1109	3.40922	1083	246	Il10rb	Interleukin-10 receptor beta chain Precursor (IL-10R-B)(IL-10R2)(Cytokine receptor class-II member 4)(Cytokine receptor family 2 member 4)(CRF2-4)(CDw210b antigen)	ENSMUSG00000022969
1110	3.40777	1655	414	Cct2	T-complex protein 1 subunit beta (TCP-1-beta)(CCT-beta)	ENSMUSG00000034024
1111	3.40594	244	0	Tnxb	tenascin XB	ENSMUSG00000033327
1112	3.40506	976	215	Repin1	Replication initiator 1 (Zinc finger protein 464)(Zfp-464)	ENSMUSG00000052751
1113	3.40496	312	20	Rala	Ras-related protein Ral-A Precursor	ENSMUSG00000008859
1114	3.40341	1098	251	Parp4	poly (ADP-ribose) polymerase family, member 4	ENSMUSG00000054509
1115	3.4	427	54	Wbp4	WW domain-binding protein 4 (WBP-4)(WW domain-containing-binding protein 4)(Formin-binding protein 21)	ENSMUSG00000022023
1116	3.39938	998	222	Anxa6	Annexin A6 (Annexin-6)(Annexin VI)(Lipocortin VI)(p68)(p70)(Protein III)(Chromobindin-20)(67 kDa calelectrin)(Calphobindin-II)(CPB-II)	ENSMUSG00000018340
1117	3.39669	722	141	Sgsm2	Small G protein signaling modulator 2 (RUN and TBC1 domain-containing protein 1)	ENSMUSG00000038351
1118	3.39655	688	131	Prpf38b	Pre-mRNA-splicing factor 38B	ENSMUSG00000027881
1119	3.39259	8965	2571	Psap	Sulfated glycoprotein 1 Precursor (SGP-1)(Prosaposin)	ENSMUSG00000004207
1120	3.39252	263	6	Tmem140	Transmembrane protein 140	ENSMUSG00000057137
1121	3.38996	778	158	Trpc4ap	Trpc4-associated protein (Trp4-associated protein)(Short transient receptor potential channel 4-associated protein)(TNF-receptor ubiquitous scaffolding/signaling protein)(Protein TRUSS)(TAP1 protein)(Rabex-5/Rin2-interacting protein)	ENSMUSG00000038324
1122	3.38938	283	12	Ict1	Immature colon carcinoma transcript 1 protein Precursor	ENSMUSG00000018858
1123	3.38793	293	15	Camk2n1	Calcium/calmodulin-dependent protein kinase II inhibitor 1 (calcium/calmodulin-dependent protein kinase II inhibitor alpha)(mCaMKIINalpha)	ENSMUSG00000046447
1124	3.38788	459	64	Txlna	Alpha-taxilin	ENSMUSG00000053841
1125	3.38725	591	103	Chd2	chromodomain helicase DNA binding protein 2 (Chd2), mRNA	ENSMUSG00000078671
1126	3.38462	472	68	Tfdp2	Transcription factor Dp-2 (E2F dimerization partner 2)(Dp-3)	ENSMUSG00000032411
1127	3.38421	1186	279	Ube2j1	Ubiquitin-conjugating enzyme E2 J1 (EC 6.3.2.19)(Non-canonical ubiquitin-conjugating enzyme 1)(NCUBE1)	ENSMUSG00000028277
1128	3.37838	275	10	Gusb	Beta-glucuronidase Precursor (EC 3.2.1.31)	ENSMUSG00000025534
1129	3.37654	447	61	Mettl3	N6-adenosine-methyltransferase 70 kDa subunit (MT-A70)(EC 2.1.1.62)(Methyltransferase-like protein 3)	ENSMUSG00000022160
1130	3.37229	679	130	Klhdc8b	Kelch domain-containing protein 8B	ENSMUSG00000032609
1131	3.37162	399	47	Eif3j	eukaryotic translation initiation factor 3, subunit J	ENSMUSG00000027236
1132	3.36842	284	13	Sgcb	Beta-sarcoglycan (Beta-SG)(43 kDa dystrophin-associated glycoprotein)(43DAG)	ENSMUSG00000029156
1133	3.36634	240	0	Serinc2	Serine incorporator 2 (Tumor differentially expressed 2-like)	ENSMUSG00000023232
1134	3.36607	277	11	Vav3	Guanine nucleotide exchange factor VAV3 (VAV-3)	ENSMUSG00000033721
1135	3.36567	351	33	Ssh2	Protein phosphatase Slingshot homolog 2 (EC 3.1.3.48)(EC 3.1.3.16)(SSH-2L)(mSSH-2L)	ENSMUSG00000037926
1136	3.36283	280	12	Usp2	Ubiquitin carboxyl-terminal hydrolase 2 (EC 3.1.2.15)(Ubiquitin thioesterase 2)(Ubiquitin-specific-processing protease 2)(Deubiquitinating enzyme 2)(41 kDa ubiquitin-specific protease)	ENSMUSG00000032010
1137	3.36145	458	65	Mov10	Putative helicase MOV-10 (EC 3.6.1.-)(Moloney leukemia virus 10 protein)	ENSMUSG00000002227
1138	3.35945	629	116	Klf10	Krueppel-like factor 10 (Transforming growth factor-beta-inducible early growth response protein 1)(TGFB-inducible early growth response protein 1)(TIEG-1)(GDNF-inducible factor)(Transcription factor GIF)(mGIF)	ENSMUSG00000037465
1139	3.35806	941	209	Bcas2	Pre-mRNA-splicing factor SPF27 (Breast carcinoma-amplified sequence 2 homolog)(DNA amplified in mammary carcinoma 1 protein)	ENSMUSG00000005687
1140	3.35676	521	84	Sh3glb2	Endophilin-B2 (SH3 domain-containing GRB2-like protein B2)	ENSMUSG00000026860
1141	3.35625	437	59	Rab20	Ras-related protein Rab-20	ENSMUSG00000031504
1142	3.35294	242	1	Ltf	Lactotransferrin Precursor (Lactoferrin)(EC 3.4.21.-)	ENSMUSG00000032496
1143	3.34951	245	2	Slc16a1	Monocarboxylate transporter 1 (MCT 1)(Solute carrier family 16 member 1)	ENSMUSG00000032902
1144	3.34951	245	2	Mgat4a	Alpha-1,3-mannosyl-glycoprotein 4-beta-N-acetylglucosaminyltransferase A (EC 2.4.1.145)(UDP-N-acetylglucosamine	ENSMUSG00000026110
1145	3.34752	372	40	Crat	Carnitine O-acetyltransferase (Carnitine acetylase)(EC 2.3.1.7)(Carnitine acetyltransferase)(CrAT)(CAT)	ENSMUSG00000026853
1146	3.34653	238	0	Gpr151	Probable G-protein coupled receptor 151 protein (G-protein coupled receptor PGR7)(GPCR-2037)	ENSMUSG00000042816
1147	3.34483	288	15	Gpx7	Glutathione peroxidase 7 Precursor (EC 1.11.1.9)	ENSMUSG00000028597
1148	3.34468	686	134	Pdha1	Pyruvate dehydrogenase E1 component subunit alpha, somatic form, mitochondrial Precursor (EC 1.2.4.1)(PDHE1-A type I)	ENSMUSG00000031299
1149	3.344	736	149	Mpp7	MAGUK p55 subfamily member 7	ENSMUSG00000057440
1150	3.33981	244	2	4933433P14Rik	GSK3-beta interaction protein (GSKIP;)	ENSMUSG00000044715
1151	3.33913	284	14	Tada1l	Transcriptional adapter 1-like protein	ENSMUSG00000026563
1152	3.33704	801	169	Tmem220	Transmembrane protein 220	ENSMUSG00000050270
1153	3.33648	961	217	Fam20c	Dentin matrix protein 4 Precursor (DMP-4)(Protein FAM20C)	ENSMUSG00000025854
1154	3.33582	347	33	Rufy1	RUN and FYVE domain-containing protein 1 (Rab4-interacting protein)	ENSMUSG00000020375
1155	3.33553	407	51	Sdccag10	Peptidyl-prolyl cis-trans isomerase SDCCAG10 (EC 5.2.1.8)	ENSMUSG00000021715
1156	3.33333	250	4	Cbln3	Cerebellin-3 Precursor	ENSMUSG00000040380
1157	3.33333	290	16	Mansc1	MANSC domain-containing protein 1 Precursor	ENSMUSG00000032718
1158	3.3301	243	2	Necab3	N-terminal EF-hand calcium-binding protein 3 (Amyloid beta A4 protein-binding family A member 2-binding protein)(X11L-binding protein 51)(mXB51)	ENSMUSG00000027489
1159	3.32827	995	228	Atp1b1	Sodium/potassium-transporting ATPase subunit beta-1 (Sodium/potassium-dependent ATPase subunit beta-1)	ENSMUSG00000026576
1160	3.3271	256	6	Amt	Aminomethyltransferase, mitochondrial Precursor (EC 2.1.2.10)(Glycine cleavage system T protein)(GCVT)	ENSMUSG00000032607
1161	3.32692	246	3	Nope	Neighbor of punc e11 Precursor (Protein DDM36)	ENSMUSG00000032816
1162	3.32624	369	40	Lnp	Protein lunapark (Protein ulnaless)	ENSMUSG00000009207
1163	3.32576	339	31	Lyve1	Lymphatic vessel endothelial hyaluronic acid receptor 1 Precursor (LYVE-1)(Cell surface retention sequence-binding protein 1)(CRSBP-1)(Extracellular link domain-containing protein 1)	ENSMUSG00000030787
1164	3.3253	452	65	Plekhf1	Pleckstrin homology domain-containing family F member 1 (PH domain-containing family F member 1)(Lysosome-associated apoptosis-inducing protein containing PH and FYVE domains)	ENSMUSG00000074170
1165	3.31977	471	71	Stard8	StAR-related lipid transfer protein 8 (START domain-containing protein 8)(StARD8)	ENSMUSG00000031216
1166	3.31538	331	29	Ipo9	Importin-9 (Imp9)(Importin-9a)(Imp9a)(Importin-9b)(Imp9b)(Ran-binding protein 9)(RanBP9)	ENSMUSG00000041879
1167	3.315	563	99	Pctk1	Serine/threonine-protein kinase PCTAIRE-1 (EC 2.7.11.22)(PCTAIRE-motif protein kinase 1)(CRK5)	ENSMUSG00000031065
1168	3.31111	496	79	Wdr12	WD repeat-containing protein 12 (YTM1 homolog)	ENSMUSG00000026019
1169	3.30872	393	48	Gpr107	Protein GPR107 Precursor	ENSMUSG00000000194
1170	3.30565	895	200	Ddx46	Probable ATP-dependent RNA helicase DDX46 (EC 3.6.1.-)(DEAD box protein 46)	ENSMUSG00000021500
1171	3.30508	290	17	Sfrs14	Putative splicing factor, arginine/serine-rich 14 (Arginine/serine-rich-splicing factor 14)	ENSMUSG00000036054
1172	3.30147	349	35	Nomo1	nodal modulator 1	ENSMUSG00000030835
1173	3.29752	299	20	Sh3d19	SH3 domain-containing protein 19 (Kryn)	ENSMUSG00000028082
1174	3.29721	3095	868	Rhoa	Transforming protein RhoA Precursor	ENSMUSG00000007815
1175	3.2963	434	61	Otud1	OTU domain-containing protein 1	ENSMUSG00000043415
1176	3.29412	236	1	Cytsb	Sperm antigen with calponin homology and coiled-coil domains 1	ENSMUSG00000042331
1177	3.28151	681	137	Zcchc2	Zinc finger CCHC domain-containing protein 2	ENSMUSG00000038866
1178	3.27972	369	42	Tmem107	Transmembrane protein 107	ENSMUSG00000020895
1179	3.27895	523	89	Med7	Mediator of RNA polymerase II transcription subunit 7 (Mediator complex subunit 7)(Cofactor required for Sp1 transcriptional activation subunit 9)(CRSP complex subunit 9)	ENSMUSG00000020397
1180	3.27885	923	211	Fabp7	Fatty acid-binding protein, brain (B-FABP)(Fatty acid-binding protein 7)(Brain lipid-binding protein)(BLBP)	ENSMUSG00000019874
1181	3.27826	277	14	Yipf1	Protein YIPF1 (YIP1 family member 1)	ENSMUSG00000057375
1182	3.26733	230	0	Chml	Rab proteins geranylgeranyltransferase component A 2 (Rab escort protein 2)(REP-2)(Choroideraemia-like protein)	ENSMUSG00000078185
1183	3.26733	230	0	Glra4	Glycine receptor subunit alpha-4 Precursor	ENSMUSG00000018595
1184	3.26613	1520	395	Atrn	Attractin Precursor (Protein mahogany)	ENSMUSG00000027312
1185	3.2619	996	235	Arpp19	cAMP-regulated phosphoprotein 19 (ARPP-19)	ENSMUSG00000007656
1186	3.26048	989	233	Lmbrd1	Probable lysosomal cobalamin transporter (LMBR1 domain-containing protein 1)(Protein N90b)	ENSMUSG00000073725
1187	3.25772	2011	547	Gng5	Guanine nucleotide-binding protein G(I)/G(S)/G(O) subunit gamma-5 Precursor	ENSMUSG00000068523
1188	3.25758	330	31	Abcb9	ATP-binding cassette sub-family B member 9 Precursor (ATP-binding cassette transporter 9)(ABC transporter 9 protein)(mABCB9)(TAP-like protein)(TAPL)	ENSMUSG00000029408
1189	3.25758	330	31	Mapre1	Microtubule-associated protein RP/EB family member 1 (APC-binding protein EB1)(End-binding protein 1)(EB1)	ENSMUSG00000027479
1190	3.25714	242	4	Wdr70	WD repeat-containing protein 70	ENSMUSG00000039828
1191	3.25424	284	17	Cdk5rap2	CDK5 regulatory subunit-associated protein 2 (CDK5 activator-binding protein C48)	ENSMUSG00000039298
1192	3.25296	1546	405	Dnajc14	DnaJ homolog subfamily C member 14	ENSMUSG00000025354
1193	3.25202	1513	395	Hmgn2	Non-histone chromosomal protein HMG-17 (High-mobility group nucleosome-binding domain-containing protein 2)	ENSMUSG00000003038
1194	3.25185	778	169	Ars2	Arsenite-resistance protein 2	ENSMUSG00000037364
1195	3.24963	4313	1257	Rdx	Radixin (ESP10)	ENSMUSG00000032050
1196	3.24576	283	17	Gpr89	Protein GPR89	ENSMUSG00000028096
1197	3.2451	231	1	Fam171b	Protein FAM171B Precursor	ENSMUSG00000048388
1198	3.24348	273	14	Chpf	Chondroitin sulfate synthase 2 (EC 2.4.1.175)(Glucuronosyl-N-acetylgalactosaminyl-proteoglycan 4-beta-N-acetylgalactosaminyltransferase II)(N-acetylgalactosaminyl-proteoglycan 3-beta-glucuronosyltransferase II)(EC 2.4.1.226)(Chondroitin glucuronyltransferase II)(N-acetylgalactosaminyltransferase)(Chondroitin-polymerizing factor)	ENSMUSG00000032997
1199	3.24088	344	36	Esam	Endothelial cell-selective adhesion molecule Precursor	ENSMUSG00000001946
1200	3.24074	250	7	Stim1	Stromal interaction molecule 1 Precursor	ENSMUSG00000030987
1201	3.2381	240	4	Leprel1	Prolyl 3-hydroxylase 2 Precursor (EC 1.14.11.7)(Leprecan-like protein 1)	ENSMUSG00000038168
1202	3.2381	920	214	Hsf4	Heat shock factor protein 4 (HSF 4)(Heat shock transcription factor 4)(HSTF 4)(mHSF4)	ENSMUSG00000033249
1203	3.23684	638	127	Leng8	Leukocyte receptor cluster member 8 homolog	ENSMUSG00000035545
1204	3.23317	2493	701	Ssbp3	Single-stranded DNA-binding protein 3 (Sequence-specific single-stranded-DNA-binding protein)(Lck-associated signal transducer)	ENSMUSG00000061887
1205	3.23301	233	2	Ccnyl1	cyclin Y-like 1	ENSMUSG00000070871
1206	3.23171	430	63	Tbc1d8	TBC1 domain family member 8 (Vascular Rab-GAP/TBC-containing protein)(BUB2-like protein 1)	ENSMUSG00000003134
1207	3.22892	3652	1061	Cox8a	Cytochrome c oxidase polypeptide 8A, mitochondrial Precursor (Cytochrome c oxidase polypeptide VIII-liver)(Cytochrome c oxidase subunit 8-2)	ENSMUSG00000035885
1208	3.22791	594	114	Ccnl1	Cyclin-L1 (Cyclin-L)(Cyclin Ania-6a)	ENSMUSG00000027829
1209	3.22785	410	57	Snrnp25	U11/U12 small nuclear ribonucleoprotein 25 kDa protein (U11/U12 snRNP 25 kDa protein)	ENSMUSG00000040767
1210	3.2226	841	191	Crip2	Cysteine-rich protein 2 (CRP2)(Heart LIM protein)	ENSMUSG00000006356
1211	3.22086	425	62	Trim56	Tripartite motif-containing protein 56	ENSMUSG00000043279
1212	3.21154	234	3	Etv2	ETS translocation variant 2 (Ets-related protein 71)	ENSMUSG00000006311
1213	3.20979	359	42	Fam92a	Protein FAM92A1	ENSMUSG00000028218
1214	3.20913	744	162	Wbp11	WW domain-binding protein 11 (WBP-11)	ENSMUSG00000030216
1215	3.20907	1174	296	Athl1	Acid trehalase-like protein 1 (EC 3.2.1.-)	ENSMUSG00000062031
1216	3.20721	256	10	Rbmx2	RNA-binding motif protein, X-linked 2	ENSMUSG00000031107
1217	3.20588	227	1	Fbxo28	F-box only protein 28	ENSMUSG00000047539
1218	3.20496	3262	948	Akr7a5	Aflatoxin B1 aldehyde reductase member 2 (EC 1.-.-.-)	ENSMUSG00000028743
1219	3.2006	969	233	Ganc	Neutral alpha-glucosidase C (EC 3.2.1.-)	ENSMUSG00000062646
1220	3.2	236	4	Efhc1	EF-hand domain-containing protein 1	ENSMUSG00000041809
1221	3.19936	1890	521	Taldo1	Transaldolase (EC 2.2.1.2)	ENSMUSG00000025503
1222	3.19802	223	0	Igh-6	Immunoglobulin heavy chain C gene segment	ENSMUSG00000076617
1223	3.19753	677	142	Tnpo1	Transportin-1 (Importin beta-2)(Karyopherin beta-2)	ENSMUSG00000009470
1224	3.19728	370	46	Pcsk7	Proprotein convertase subtilisin/kexin type 7 Precursor (EC 3.4.21.-)(Proprotein convertase PC7)(Subtilisin/kexin-like protease PC7)(Prohormone convertase PC7)(Subtilisin-like proprotein convertase 7)(SPC7)	ENSMUSG00000035382
1225	3.19658	274	16	Fam40a	Protein FAM40A	ENSMUSG00000014601
1226	3.19608	226	1	Ier5	Immediate early response gene 5 protein	ENSMUSG00000056708
1227	3.1913	267	14	Atp2b2	Plasma membrane calcium-transporting ATPase 2 (PMCA2)(EC 3.6.3.8)(Plasma membrane calcium ATPase isoform 2)(Plasma membrane calcium pump isoform 2)	ENSMUSG00000030302
1228	3.19084	318	30	Wdr75	WD repeat domain 75	ENSMUSG00000025995
1229	3.18952	691	147	Gnpnat1	Glucosamine 6-phosphate N-acetyltransferase (EC 2.3.1.4)(Phosphoglucosamine transacetylase)(Phosphoglucosamine acetylase)(EMeg32 protein)	ENSMUSG00000037722
1230	3.1844	349	40	Mfsd5	Major facilitator superfamily domain-containing protein 5	ENSMUSG00000045665
1231	3.18035	1875	520	Ubxn4	UBX domain-containing protein 4 (UBX domain-containing protein 2)(Erasin)	ENSMUSG00000026353
1232	3.1791	326	33	Rab6	Ras-related protein Rab-6A (Rab-6)	ENSMUSG00000030704
1233	3.17872	647	134	Ccni	Cyclin-I	ENSMUSG00000063015
1234	3.17544	262	13	Upf3a	UPF3 regulator of nonsense transcripts homolog A	ENSMUSG00000038398
1235	3.17367	1033	256	Ece1	Endothelin-converting enzyme 1 (ECE-1)(EC 3.4.24.71)	ENSMUSG00000057530
1236	3.17362	1801	498	Srrm2	Serine/arginine repetitive matrix protein 2	ENSMUSG00000039218
1237	3.17349	1217	314	Phf1	PHD finger protein 1 (Protein PHF1)(T-complex testis-expressed 3)(Polycomb-like protein 1)(mPCl1)	ENSMUSG00000024193
1238	3.17284	414	61	Als2	Alsin (Amyotrophic lateral sclerosis protein 2 homolog)	ENSMUSG00000026024
1239	3.17213	674	143	Fubp3	far upstream element (FUSE) binding protein 3	ENSMUSG00000026843
1240	3.16964	255	11	Dmxl1	DmX-like protein 1 (X-like 1 protein)	ENSMUSG00000037416
1241	3.16822	239	6	Sdr16c5	Epidermal retinal dehydrogenase 2 (RDH-E2)(EPHD-2)(EC 1.1.1.-)(Retinal short chain dehydrogenase reductase 2)(retSDR2)(Short chain dehydrogenase reductase 9)	ENSMUSG00000028236
1242	3.16561	894	213	Ctdsp2	nuclear LIM interactor-interacting factor 2 isoform b	ENSMUSG00000078429
1243	3.16438	362	45	Flad1	FAD synthetase (EC 2.7.7.2)(FMN adenylyltransferase)(FAD pyrophosphorylase)(Flavin adenine dinucleotide synthetase)	ENSMUSG00000042642
1244	3.16346	229	3	Glt28d2	glycosyltransferase 28 domain containing 1-like	ENSMUSG00000031286
1245	3.1626	289	22	Ccdc52	Coiled-coil domain-containing protein 52	ENSMUSG00000043065
1246	3.16031	314	30	4933404M19Rik	Protein PROCA1	ENSMUSG00000044122
1247	3.15882	437	69	Kpnb1	Importin subunit beta-1 (Karyopherin subunit beta-1)(Nuclear factor P97)(Pore targeting complex 97 kDa subunit)(PTAC97)(SCG)	ENSMUSG00000001440
1248	3.15842	219	0	Slc28a1	solute carrier family 28 (sodium-coupled nucleoside transporter), member 1	ENSMUSG00000025726
1249	3.15686	222	1	Dusp18	Dual specificity protein phosphatase 18 (EC 3.1.3.48)(EC 3.1.3.16)	ENSMUSG00000047205
1250	3.15686	383	52	Sox13	SOX-13 protein	ENSMUSG00000070643
1251	3.15385	433	68	Alg5	Dolichyl-phosphate beta-glucosyltransferase (DolP-glucosyltransferase)(EC 2.4.1.117)(Asparagine-linked glycosylation protein 5)	ENSMUSG00000036632
1252	3.15328	332	36	Ela3	elastase 3, pancreatic	ENSMUSG00000023433
1253	3.15152	420	64	Spata13	Spermatogenesis-associated protein 13	ENSMUSG00000021990
1254	3.14894	640	134	Sf1	Splicing factor 1 (Zinc finger protein 162)(Transcription factor ZFM1)(mZFM)(Zinc finger gene in MEN1 locus)(Mammalian branch point-binding protein mBBP)(BBP)(CW17)	ENSMUSG00000024949
1255	3.14796	517	95	Tef	Thyrotroph embryonic factor	ENSMUSG00000022389
1256	3.14667	372	49	Xpot	Exportin-T (tRNA exportin)(Exportin(tRNA))	ENSMUSG00000034667
1257	3.14634	287	22	Eif2ak1	Eukaryotic translation initiation factor 2-alpha kinase 1 (EC 2.7.11.1)(Heme-regulated eukaryotic initiation factor eIF-2-alpha kinase)(Hemin-sensitive initiation factor 2-alpha kinase)(Heme-regulated inhibitor)(Heme-controlled repressor)(HCR)	ENSMUSG00000029613
1258	3.14423	227	3	Ptpre	Receptor-type tyrosine-protein phosphatase epsilon Precursor (Protein-tyrosine phosphatase epsilon)(R-PTP-epsilon)(EC 3.1.3.48)	ENSMUSG00000041836
1259	3.14379	381	52	Tgfbr3	TGF-beta receptor type III Precursor (TGFR-3)(Transforming growth factor beta receptor III)(Betaglycan)	ENSMUSG00000029287
1260	3.14304	2383	689	Unc84b	Protein unc-84 homolog B (Sad1/unc-84 protein-like 2)	ENSMUSG00000042524
1261	3.14286	230	4	Gpr160	Probable G-protein coupled receptor 160	ENSMUSG00000037661
1262	3.13889	239	7	Foxp2	Forkhead box protein P2	ENSMUSG00000029563
1263	3.13833	3167	940	Hnrnpa3	Heterogeneous nuclear ribonucleoprotein A3 (hnRNP A3)	ENSMUSG00000059005
1264	3.13675	267	16	Mfsd4	Major facilitator superfamily domain-containing protein 4	ENSMUSG00000059149
1265	3.13333	229	4	2310003L22Rik	Probable methyltransferase C20orf7 homolog, mitochondrial Precursor (EC 2.1.1.-)	ENSMUSG00000027384
1266	3.13018	429	68	Ldlrap1	Low density lipoprotein receptor adapter protein 1 (Autosomal recessive hypercholesterolemia protein homolog)	ENSMUSG00000037295
1267	3.12953	504	92	Rere	Arginine-glutamic acid dipeptide repeats protein (Atrophin-2)	ENSMUSG00000039852
1268	3.12893	1890	535	Grcc10	Protein C10	ENSMUSG00000072772
1269	3.12871	216	0	Rya3	Long palate, lung and nasal epithelium carcinoma-associated protein 3 Precursor (Ligand-binding protein RYA3)	ENSMUSG00000068008
1270	3.12745	219	1	Fancd2	Fanconi anemia group D2 protein homolog (Protein FACD2)	ENSMUSG00000034023
1271	3.12474	1428	388	Nol5	Nucleolar protein 5 (SIK-similar protein)(MSSP)	ENSMUSG00000026020
1272	3.11856	505	93	Mfn1	Mitofusin-1 (EC 3.6.5.-)(Transmembrane GTPase MFN1)	ENSMUSG00000027668
1273	3.11719	299	27	Lrch1	Leucine-rich repeat and calponin homology domain-containing protein 1 (Calponin homology domain-containing protein 1)	ENSMUSG00000068015
1274	3.11679	327	36	Ehbp1	EH domain-binding protein 1	ENSMUSG00000042302
1275	3.11429	227	4	Osbpl3	Oxysterol-binding protein-related protein 3 (OSBP-related protein 3)(ORP-3)	ENSMUSG00000029822
1276	3.11284	700	156	Ttc3	tetratricopeptide repeat domain 3	ENSMUSG00000040785
1277	3.11053	491	89	Ahnak	AHNAK nucleoprotein isoform 1	ENSMUSG00000069833
1278	3.10924	270	18	Fam129a	Protein Niban	ENSMUSG00000026483
1279	3.10811	245	10	Dhfr	Dihydrofolate reductase (EC 1.5.1.3)	ENSMUSG00000021707
1280	3.10728	711	160	Magi3	Membrane-associated guanylate kinase, WW and PDZ domain-containing protein 3 (Membrane-associated guanylate kinase inverted 3)(MAGI-3)	ENSMUSG00000052539
1281	3.10484	285	23	Ralb	Ras-related protein Ral-B Precursor	ENSMUSG00000004451
1282	3.10185	235	7	Zfp426	Zinc finger protein 426	ENSMUSG00000059475
1283	3.10084	269	18	Nup50	Nucleoporin 50 kDa (Nuclear pore-associated protein 60 kDa-like)	ENSMUSG00000016619
1284	3.1	272	19	Armc9	LisH domain-containing protein ARMC9	ENSMUSG00000062590
1285	3.09938	898	221	Emd	Emerin	ENSMUSG00000001964
1286	3.09709	219	2	Impg1	Interphotoreceptor matrix proteoglycan 1 Precursor (IPM 150 proteoglycan)(Sialoprotein associated with cones and rods)	ENSMUSG00000032343
1287	3.09434	392	58	Itsn2	Intersectin-2 (SH3 domain-containing protein 1B)(EH domain and SH3 domain regulator of endocytosis 2)(EH and SH3 domains protein 2)	ENSMUSG00000020640
1288	3.09091	308	31	Mcm3	DNA replication licensing factor MCM3 (DNA polymerase alpha holoenzyme-associated protein P1)(P1-MCM3)	ENSMUSG00000041859
1289	3.08846	703	159	Rras2	Ras-related protein R-Ras2 Precursor	ENSMUSG00000055723
1290	3.08844	808	193	Polr3k	DNA-directed RNA polymerase III subunit RPC10 (RNA polymerase III subunit C10)(DNA-directed RNA polymerase III subunit K)(RNA polymerase III subunit C11)(RPC11)	ENSMUSG00000038628
1291	3.088	286	24	Cep70	Centrosomal protein of 70 kDa (Cep70)	ENSMUSG00000056267
1292	3.08621	258	15	Ficd	FIC domain-containing protein	ENSMUSG00000053334
1293	3.08611	1011	259	Nqo2	Ribosyldihydronicotinamide dehydrogenase	ENSMUSG00000046949
1294	3.08451	338	41	Adam15	ADAM 15 Precursor (EC 3.4.24.-)(A disintegrin and metalloproteinase domain 15)(Metalloproteinase-like, disintegrin-like, and cysteine-rich protein 15)(MDC-15)(Metalloprotease RGD disintegrin protein)(Metargidin)(AD56)	ENSMUSG00000028041
1295	3.08451	557	112	Igj	Immunoglobulin J chain Precursor	ENSMUSG00000067149
1296	3.08399	1075	280	0610006I08Rik	Transmembrane protein MGC3196 homolog	ENSMUSG00000075043
1297	3.08312	1087	284	2410002O22Rik	RIKEN cDNA 2410002O22 gene (2410002O22Rik), transcript variant 4, transcribed RNA	ENSMUSG00000021711
1298	3.08291	1127	297	1810074P20Rik	UPF0555 protein KIAA0776	ENSMUSG00000040359
1299	3.0829	495	92	Unkl	RING finger protein unkempt-like	ENSMUSG00000015127
1300	3.07937	482	88	Tada3l	Transcriptional adapter 3-like (ADA3-like protein)(ADA3 homolog)(mADA3)	ENSMUSG00000048930
1301	3.07921	211	0	Cbr2	Carbonyl reductase	ENSMUSG00000025150
1302	3.07692	300	29	Thoc1	THO complex subunit 1 (Tho1)(Nuclear matrix protein p84)	ENSMUSG00000024287
1303	3.07407	398	61	Ednra	Endothelin-1 receptor Precursor (Endothelin A receptor)(ET-AR)(ET-A)	ENSMUSG00000031616
1304	3.07396	7631	2414	Gjb1	Gap junction beta-1 protein (Connexin-32)(Cx32)	ENSMUSG00000047797
1305	3.06787	3652	1122	Gtpbp4	Nucleolar GTP-binding protein 1 (Chronic renal failure gene protein)(GTP-binding protein NGB)	ENSMUSG00000021149
1306	3.06587	412	66	Zfml	Zinc finger protein 638 (Zinc finger matrin-like protein)(Nuclear protein 220)	ENSMUSG00000030016
1307	3.06557	648	143	Tmem70	Transmembrane protein 70, mitochondrial Precursor	ENSMUSG00000025940
1308	3.06542	884	220	Ikzf5	Zinc finger protein Pegasus (Ikaros family zinc finger protein 5)	ENSMUSG00000040167
1309	3.06422	234	8	Tbx2	T-box transcription factor TBX2 (T-box protein 2)	ENSMUSG00000000093
1310	3.0614	249	13	Slc11a1	Natural resistance-associated macrophage protein 1 (NRAMP 1)	ENSMUSG00000026177
1311	3.05625	389	59	Lztfl1	Leucine zipper transcription factor-like protein 1	ENSMUSG00000025245
1312	3.05357	242	11	Epb4.1l1	Band 4.1-like protein 1 (Neuronal protein 4.1)(4.1N)	ENSMUSG00000027624
1313	3.05185	312	34	Anxa9	Annexin A9 (Annexin-9)(Annexin-31)(Annexin XXXI)	ENSMUSG00000015702
1314	3.04808	217	3	Rab11b	Ras-related protein Rab-11B	ENSMUSG00000077450
1315	3.04444	311	34	Stk39	STE20/SPS1-related proline-alanine-rich protein kinase (Ste-20-related kinase)(EC 2.7.11.1)(Serine/threonine-protein kinase 39)	ENSMUSG00000027030
1316	3.04375	387	59	Ptrh2	Peptidyl-tRNA hydrolase 2, mitochondrial Precursor (PTH 2)(EC 3.1.1.29)	ENSMUSG00000072582
1317	3.04046	426	72	Arl2bp	ADP-ribosylation factor-like protein 2-binding protein (ARF-like 2-binding protein)(Binder of ARF2 protein 1)	ENSMUSG00000031776
1318	3.03974	818	201	Mll3	Histone-lysine N-methyltransferase MLL3 (EC 2.1.1.43)(Myeloid/lymphoid or mixed-lineage leukemia protein 3 homolog)	ENSMUSG00000038056
1319	3.03943	748	178	Josd1	Josephin-1 (Josephin domain-containing protein 1)	ENSMUSG00000022426
1320	3.03774	222	5	Psd4	PH and SEC7 domain-containing protein 4 (Pleckstrin homology and SEC7 domain-containing protein 4)	ENSMUSG00000026979
1321	3.03757	2649	804	Mrps15	28S ribosomal protein S15, mitochondrial Precursor (S15mt)(MRP-S15)	ENSMUSG00000028861
1322	3.0359	492	94	Lgtn	Ligatin	ENSMUSG00000026427
1323	3.0355	413	68	Stard5	StAR-related lipid transfer protein 5 (START domain-containing protein 5)(StARD5)	ENSMUSG00000046027
1324	3.03477	2082	618	Bap1	Ubiquitin carboxyl-terminal hydrolase BAP1 (EC 3.4.19.12)(BRCA1-associated protein 1)(Ubiquitin C-terminal hydrolase X4)(UCH-X4)	ENSMUSG00000021901
1325	3.03448	252	15	Scara5	Scavenger receptor class A member 5	ENSMUSG00000022032
1326	3.03226	652	147	Csnk2a1	Casein kinase II subunit alpha (CK II)(EC 2.7.11.1)	ENSMUSG00000074698
1327	3.03226	558	116	Usp22	Ubiquitin carboxyl-terminal hydrolase 22 (EC 3.1.2.15)(Ubiquitin thioesterase 22)(Ubiquitin-specific-processing protease 22)(Deubiquitinating enzyme 22)	ENSMUSG00000042506
1328	3.03147	767	185	Brd7	Bromodomain-containing protein 7 (75 kDa bromodomain protein)	ENSMUSG00000031660
1329	3.02941	209	1	Crebbp	CREB-binding protein (EC 2.3.1.48)	ENSMUSG00000022521
1330	3.02875	1375	386	Bscl2	Seipin (Bernardinelli-Seip congenital lipodystrophy type 2 protein homolog)	ENSMUSG00000071657
1331	3.02808	1302	362	Rnps1	RNA-binding protein with serine-rich domain 1	ENSMUSG00000034681
1332	3.02765	557	116	Nub1	NEDD8 ultimate buster 1 (Negative regulator of ubiquitin-like proteins 1)(Protein BS4)	ENSMUSG00000028954
1333	3.02679	239	11	Rab11fip1	Rab11 family-interacting protein 1 (Rab11-FIP1)(Rab-coupling protein)	ENSMUSG00000031488
1334	3.02451	517	103	Polr3f	DNA-directed RNA polymerase III subunit RPC6 (RNA polymerase III subunit C6)(DNA-directed RNA polymerase III subunit F)	ENSMUSG00000027427
1335	3.01942	211	2	Lnx1	E3 ubiquitin-protein ligase LNX (EC 6.3.2.-)(Numb-binding protein 1)(Ligand of Numb-binding protein 1)(Ligand of Numb protein X 1)	ENSMUSG00000029228
1336	3.01724	425	73	Tmc4	Transmembrane channel-like protein 4	ENSMUSG00000019734
1337	3.01521	693	162	Ppat	Phosphoribosyl pyrophosphate amidotransferaseMCG15865, isoform CRA_a ;	ENSMUSG00000029246
1338	3.0099	204	0	Crkl	Crk-like protein	ENSMUSG00000006134
1339	3.00683	781	192	Akap8	A-kinase anchor protein 8 (A-kinase anchor protein 95 kDa)(AKAP 95)	ENSMUSG00000024045
1340	3.00177	3301	1032	F5	Coagulation factor V Precursor (Activated protein C cofactor)	ENSMUSG00000026579
1341	3	218	5	Sf3a1	Splicing factor 3 subunit 1 (SF3a120)	ENSMUSG00000002129
1342	3	236	11	Sf3b4	Splicing factor 3B subunit 4	ENSMUSG00000068856
1343	3	266	21	Ints10	Integrator complex subunit 10 (Int10)	ENSMUSG00000031864
1344	3	242	13	Ampd3	AMP deaminase 3 (EC 3.5.4.6)(AMP deaminase isoform E)(AMP deaminase H-type)(Heart-type AMPD)	ENSMUSG00000005686
1345	2.99579	1323	374	Phip	PH-interacting protein (PHIP)(IRS-1 PH domain-binding protein)(WD repeat-containing protein 11)(Neuronal differentiation-related protein)(NDRP)	ENSMUSG00000032253
1346	2.99491	2254	685	Tax1bp1	Tax1-binding protein 1 homolog	ENSMUSG00000004535
1347	2.99275	313	37	Vars	Valyl-tRNA synthetase (EC 6.1.1.9)(Valine--tRNA ligase)(ValRS)(Protein G7a)	ENSMUSG00000007029
1348	2.99148	953	251	Grb2	Growth factor receptor-bound protein 2 (Adapter protein GRB2)(SH2/SH3 adapter GRB2)	ENSMUSG00000059923
1349	2.99107	235	11	Dscc1	Sister chromatid cohesion protein DCC1 (Defective in sister chromatid cohesion protein 1 homolog)	ENSMUSG00000022422
1350	2.98857	423	74	D2hgdh	D-2-hydroxyglutarate dehydrogenase, mitochondrial Precursor (EC 1.1.99.-)	ENSMUSG00000073609
1351	2.98438	282	27	Akap7	A-kinase anchor protein 7 (Protein kinase A-anchoring protein 7)(A-kinase anchor protein 18)(A-kinase anchor protein 9 kDa)	ENSMUSG00000039166
1352	2.98338	977	260	Sri	Sorcin	ENSMUSG00000003161
1353	2.98039	204	1	4921515J06Rik	UPF0486 protein C1orf59 homolog	ENSMUSG00000045662
1354	2.98013	350	50	Pitpnc1	Cytoplasmic phosphatidylinositol transfer protein 1 (Retinal degeneration B homolog beta)(RdgBbeta)(M-rdgB beta)(MrdgBbeta)(mM-rdgBbeta)	ENSMUSG00000040430
1355	2.97768	567	123	Mprip	Myosin phosphatase Rho-interacting protein (Rho-interacting protein 3)(RIP3)(p116Rip)	ENSMUSG00000005417
1356	2.97351	349	50	Tmem55b	Transmembrane protein 55B (EC 3.1.3.78)(Type I phosphatidylinositol 4,5-bisphosphate 4-phosphatase)(PtdIns-4,5-P2 4-Ptase I)	ENSMUSG00000035953
1357	2.96802	921	243	Pten	Phosphatidylinositol-3,4,5-trisphosphate 3-phosphatase PTEN (EC 3.1.3.67)(Mutated in multiple advanced cancers 1)	ENSMUSG00000013663
1358	2.96596	597	134	Itgav	Integrin alpha-V Precursor (Vitronectin receptor subunit alpha)(CD51 antigen)	ENSMUSG00000027087
1359	2.96579	17674	5892	Igfbp4	Insulin-like growth factor-binding protein 4 Precursor (IGF-binding protein 4)(IGFBP-4)(IBP-4)	ENSMUSG00000017493
1360	2.96356	632	146	Mrps9	28S ribosomal protein S9, mitochondrial Precursor (S9mt)(MRP-S9)	ENSMUSG00000060679
1361	2.96226	214	5	Lig1	DNA ligase 1 (EC 6.5.1.1)(DNA ligase I)(Polydeoxyribonucleotide synthase	ENSMUSG00000056394
1362	2.96226	214	5	Trpv6	Transient receptor potential cation channel subfamily V member 6 (TrpV6)(Epithelial calcium channel 2)(ECaC2)(Calcium transport protein 1)(CaT1)	ENSMUSG00000029868
1363	2.9562	305	36	Pmepa1	Transmembrane prostate androgen-induced protein (NEDD4 WW domain-binding protein 4)	ENSMUSG00000038400
1364	2.95506	952	255	Slc35d1	solute carrier family 35 (UDP-glucuronic acid/UDP-N-acetylgalactosamine dual transporter), member D1	ENSMUSG00000028521
1365	2.95489	293	32	Phf20	PHD finger protein 20 (Hepatocellular carcinoma-associated antigen 58 homolog)	ENSMUSG00000038116
1366	2.95367	1430	417	Stbd1	Starch-binding domain-containing protein 1 (Genethonin-1)	ENSMUSG00000047963
1367	2.95349	281	28	Ypel5	Protein yippee-like 5	ENSMUSG00000039770
1368	2.95283	213	5	Bcl2l13	Bcl-2-like 13 protein (Protein Mil1)(Bcl-rambo)	ENSMUSG00000009112
1369	2.95098	201	1	B4galt2	Beta-1,4-galactosyltransferase 2 (Beta-1,4-GalTase 2)(Beta4Gal-T2)(b4Gal-T2)(EC 2.4.1.-)(UDP-galactose	ENSMUSG00000028541
1370	2.95035	316	40	Jarid1a	Histone demethylase JARID1A (EC 1.14.11.-)(Jumonji/ARID domain-containing protein 1A)(Retinoblastoma-binding protein 2)(RBBP-2)	ENSMUSG00000030180
1371	2.94929	1354	392	Slco2b1	Solute carrier organic anion transporter family member 2B1 (Solute carrier family 21 member 9)	ENSMUSG00000030737
1372	2.94595	227	10	Cass4	Cas scaffolding protein family member 4	ENSMUSG00000074570
1373	2.94515	598	136	Rassf8	Ras association domain-containing protein 8 (Carcinoma-associated protein HOJ-1 homolog)	ENSMUSG00000030259
1374	2.94495	221	8	Cmpk2	UMP-CMP kinase 2, mitochondrial Precursor (EC 2.7.4.14)(Thymidylate kinase LPS-inducible member)(TYKi)	ENSMUSG00000020638
1375	2.94453	3616	1161	Chd4	Chromodomain-helicase-DNA-binding protein 4 (CHD-4)	ENSMUSG00000063870
1376	2.94384	1787	540	AC121292.9-2	Histone H3.3	ENSMUSG00000060743
1377	2.94207	2795	883	Mtdh	Protein LYRIC (Lysine-rich CEACAM1 co-isolated protein)(3D3/LYRIC)(Metastasis adhesion protein)(Metadherin)	ENSMUSG00000022255
1378	2.94009	538	116	Gmfg	Glia maturation factor gamma (GMF-gamma)	ENSMUSG00000060791
1379	2.93846	664	159	Zbtb38	zinc finger and BTB domain containing 38	ENSMUSG00000040433
1380	2.93836	329	45	Zmym6	zinc finger, MYM-type 6	ENSMUSG00000042408
1381	2.93488	531	114	Nt5c2	Cytosolic purine 5'-nucleotidase (EC 3.1.3.5)(5'-nucleotidase cytosolic II)	ENSMUSG00000025041
1382	2.93458	214	6	Farp1	FERMRhoGEF (Arhgef) and pleckstrin domain protein 1	ENSMUSG00000025555
1383	2.93333	340	49	Pip4k2c	Phosphatidylinositol-5-phosphate 4-kinase type-2 gamma (EC 2.7.1.149)(Phosphatidylinositol-5-phosphate 4-kinase type II gamma)(PI(5)P 4-kinase type II gamma)(PIP4KII-gamma)	ENSMUSG00000025417
1384	2.93333	208	4	Rab15	Ras-related protein Rab-15	ENSMUSG00000021062
1385	2.9329	3091	987	Cyb5r3	NADH-cytochrome b5 reductase 3 (Cytochrome b5 reductase)(B5R)(EC 1.6.2.2)(Diaphorase-1)	ENSMUSG00000018042
1386	2.93164	3245	1040	Sec61g	Protein transport protein Sec61 subunit gamma	ENSMUSG00000078974
1387	2.93158	457	89	Gpn1	GPN-loop GTPase 1 (XPA-binding protein 1)(MBD2-interacting protein)(MBDin)	ENSMUSG00000064037
1388	2.93077	281	29	H2-Ea	H-2 class II histocompatibility antigen, E-U alpha chain Fragment	ENSMUSG00000036322
1389	2.93069	196	0	AC139131.19	vomeronasal receptor Vmn2r53	ENSMUSG00000053088
1390	2.93069	196	0	Eif1ad	Probable RNA-binding protein EIF1AD (Eukaryotic translation initiation factor 1A domain-containing protein)	ENSMUSG00000024841
1391	2.9292	231	12	Gfpt2	Glucosamine--fructose-6-phosphate aminotransferase	ENSMUSG00000020363
1392	2.92405	593	136	Garnl3	GTPase-activating Rap/Ran-GAP domain-like protein 3	ENSMUSG00000038860
1393	2.92116	1308	381	Npepps	Puromycin-sensitive aminopeptidase (PSA)(EC 3.4.11.-)	ENSMUSG00000001441
1394	2.92079	195	0	Nccrp1	non-specific cytotoxic cell receptor protein 1 homolog	ENSMUSG00000047586
1395	2.91667	215	7	Slc35c2	Solute carrier family 35 member C2 (Ovarian cancer overexpressed gene 1 protein)	ENSMUSG00000017664
1396	2.91473	276	28	Skint8	Selection and upkeep of intraepithelial T-cells protein 8 Precursor (Skint-8)	ENSMUSG00000078599
1397	2.91406	273	27	Tnfaip6	Tumor necrosis factor-inducible gene 6 protein Precursor (TNF-stimulated gene 6 protein)(TSG-6)(Tumor necrosis factor, alpha-induced protein 6)	ENSMUSG00000053475
1398	2.91379	238	15	Wdr85	WD repeat-containing protein 85	ENSMUSG00000026975
1399	2.91373	643	154	Toe1	Target of EGR1 protein 1	ENSMUSG00000028688
1400	2.90678	243	17	Spn	Leukosialin Precursor (Leukocyte sialoglycoprotein)(Sialophorin)(Ly-48)(B-cell differentiation antigen LP-3)(CD43 antigen)	ENSMUSG00000051457
1401	2.90604	766	197	Trappc1	Trafficking protein particle complex subunit 1	ENSMUSG00000049299
1402	2.90423	931	254	Prelid1	PRELI domain-containing protein 1, mitochondrial Precursor (Px19-like protein)	ENSMUSG00000021486
1403	2.90267	1749	536	Maob	Amine oxidase	ENSMUSG00000040147
1404	2.89881	387	67	Ppp1r11	Protein phosphatase 1 regulatory subunit 11 (T-complex testis expressed protein 5)(Tctex-5)	ENSMUSG00000036398
1405	2.89815	213	7	Ppp1r13l	RelA-associated inhibitor (Inhibitor of ASPP protein)(Protein iASPP)(PPP1R13B-like protein)(NFkB-interacting protein 1)	ENSMUSG00000040734
1406	2.89807	952	262	Mrpl38	39S ribosomal protein L38, mitochondrial Precursor (L38mt)(MRP-L38)	ENSMUSG00000020775
1407	2.8972	520	113	0610007L01Rik	UPF0458 protein C7orf42 homolog	ENSMUSG00000053094
1408	2.895	479	99	Ptpn3	Tyrosine-protein phosphatase non-receptor type 3 (EC 3.1.3.48)	ENSMUSG00000038764
1409	2.89349	389	68	Psme3	Proteasome activator complex subunit 3 (Proteasome activator 28 subunit gamma)(PA28gamma)(PA28g)(Activator of multicatalytic protease subunit 3)(11S regulator complex subunit gamma)(REG-gamma)(Ki nuclear autoantigen)	ENSMUSG00000078652
1410	2.89286	224	11	Slc35a4	Probable UDP-sugar transporter protein SLC35A4 (Solute carrier family 35 member A4)	ENSMUSG00000033272
1411	2.89109	192	0	Tex21	testis expressed gene 21	ENSMUSG00000021056
1412	2.8892	1986	621	Dld	Dihydrolipoyl dehydrogenase, mitochondrial Precursor (EC 1.8.1.4)(Dihydrolipoamide dehydrogenase)	ENSMUSG00000020664
1413	2.88736	1156	334	Stap2	Signal-transducing adaptor protein 2 (STAP-2)	ENSMUSG00000038781
1414	2.88645	1476	445	Ykt6	Synaptobrevin homolog YKT6 (EC 2.3.1.-)	ENSMUSG00000002741
1415	2.88571	203	4	Rbm10	RNA-binding protein 10 (RNA-binding motif protein 10)	ENSMUSG00000031060
1416	2.88182	217	9	Enc1	Ectoderm-neural cortex protein 1 (ENC-1)	ENSMUSG00000041773
1417	2.88083	456	92	Armc10	Armadillo repeat-containing protein 10	ENSMUSG00000038525
1418	2.87603	248	20	Zfp593	Zinc finger protein 593 (Zinc finger protein T86)	ENSMUSG00000028840
1419	2.87413	311	42	Cugbp2	CUG-BP- and ETR-3-like factor 2 (CELF-2)(Bruno-like protein 3)(RNA-binding protein BRUNOL-3)(CUG triplet repeat RNA-binding protein 2)(CUG-BP2)(ELAV-type RNA-binding protein 3)(ETR-3)(mETR-3)(Neuroblastoma apoptosis-related RNA-binding protein)(mNapor)	ENSMUSG00000002107
1420	2.87304	2095	663	Amy1	Alpha-amylase 1 Precursor (EC 3.2.1.1)(1,4-alpha-D-glucan glucanohydrolase 1)(Salivary and hepatic alpha-amylase)	ENSMUSG00000074264
1421	2.87059	876	239	Ei24	Etoposide-induced protein 2.4 (p53-induced gene 8 protein)	ENSMUSG00000062762
1422	2.86897	316	44	Smap2	Stromal membrane-associated protein 2 (Stromal membrane-associated protein 1-like)	ENSMUSG00000032870
1423	2.86861	293	36	Cpsf2	Cleavage and polyadenylation specificity factor subunit 2 (Cleavage and polyadenylation specificity factor 100 kDa subunit)(CPSF 100 kDa subunit)	ENSMUSG00000041781
1424	2.86667	545	124	Sall1	Sal-like protein 1 (Zinc finger protein Spalt-3)(Sal-3)(MSal-3)	ENSMUSG00000031665
1425	2.86508	261	25	Cpsf6	Cleavage and polyadenylation specificity factor subunit 6	ENSMUSG00000055531
1426	2.86391	384	68	Cpne2	Copine-2 (Copine II)	ENSMUSG00000034361
1427	2.86318	1595	491	Wnk1	Serine/threonine-protein kinase WNK1 (EC 2.7.11.1)(Protein kinase with no lysine 1)(Protein kinase, lysine-deficient 1)	ENSMUSG00000045962
1428	2.86243	441	88	Dgat2	Diacylglycerol O-acyltransferase 2 (EC 2.3.1.20)(Diglyceride acyltransferase 2)	ENSMUSG00000030747
1429	2.86022	432	85	4833409A17Rik	Probable oxidoreductase C10orf33 homolog (EC 1.-.-.-)	ENSMUSG00000060224
1430	2.85612	297	38	Bxdc2	Brix domain-containing protein 2 (Ribosome biogenesis protein Brix)	ENSMUSG00000022247
1431	2.85606	277	31	Apc	Adenomatous polyposis coli protein (Protein APC)(mAPC)	ENSMUSG00000005871
1432	2.85577	197	3	Cdk3	Cell division protein kinase 3 (EC 2.7.11.22)	ENSMUSG00000034288
1433	2.85455	214	9	Kctd18	potassium channel tetramerisation domain containing 18	ENSMUSG00000054770
1434	2.85437	194	2	Itpr3	Inositol 1,4,5-trisphosphate receptor type 3 (Type 3 inositol 1,4,5-trisphosphate receptor)(Type 3 InsP3 receptor)(IP3 receptor isoform 3)(InsP3R3)	ENSMUSG00000042644
1435	2.85401	291	36	Ncoa1	Nuclear receptor coactivator 1 (NCoA-1)(EC 2.3.1.48)(Steroid receptor coactivator 1)(SRC-1)(Nuclear receptor coactivator protein 1)(mNRC-1)	ENSMUSG00000020647
1436	2.85345	231	15	Ccdc45	Coiled-coil domain-containing protein 45	ENSMUSG00000018372
1437	2.85196	844	230	G3bp1	Ras GTPase-activating protein-binding protein 1 (EC 3.6.1.-)(G3BP-1)(ATP-dependent DNA helicase VIII)(HDH-VIII)(GAP SH3 domain-binding protein 1)	ENSMUSG00000018583
1438	2.85039	2491	808	Ube2k	Ubiquitin-conjugating enzyme E2 K (EC 6.3.2.19)(Ubiquitin-conjugating enzyme E2-25 kDa)(E2(25K))(Ubiquitin-protein ligase)(Ubiquitin carrier protein)(Huntingtin-interacting protein 2)(HIP-2)	ENSMUSG00000029203
1439	2.84883	2934	964	Sdha	Succinate dehydrogenase	ENSMUSG00000021577
1440	2.84615	381	68	Hnrnpr	heterogeneous nuclear ribonucleoprotein R	ENSMUSG00000066037
1441	2.84459	321	47	Ccdc127	Coiled-coil domain-containing protein 127	ENSMUSG00000021578
1442	2.84431	375	66	H13	Minor histocompatibility antigen H13 (EC 3.4.23.-)(Signal peptide peptidase)(Presenilin-like protein 3)	ENSMUSG00000019188
1443	2.84399	1723	540	Ccar1	Cell division cycle and apoptosis regulator protein 1 (Cell cycle and apoptosis regulatory protein 1)(CARP-1)	ENSMUSG00000020074
1444	2.83983	556	130	Atp2b1	plasma membrane calcium ATPase 1	ENSMUSG00000019943
1445	2.83962	201	5	Folr1	Folate receptor alpha Precursor (FR-alpha)(Folate receptor 1)(Folate-binding protein 1)	ENSMUSG00000001827
1446	2.83784	215	10	Taf3	Transcription initiation factor TFIID subunit 3 (TBP-associated factor 3)(Transcription initiation factor TFIID 140 kDa subunit)(140 kDa TATA box-binding protein-associated factor)(TAF140)(TAFII140)	ENSMUSG00000025782
1447	2.83761	232	16	E330009J07Rik	Protein LCHN	ENSMUSG00000037172
1448	2.83621	229	15	Mef2c	myocyte enhancer factor 2C	ENSMUSG00000005583
1449	2.83594	263	27	Col4a3bp	Collagen type IV alpha-3-binding protein (Ceramide transfer protein)(Goodpasture antigen-binding protein)(GPBP)(StAR-related lipid transfer protein 11)(START domain-containing protein 11)(StARD11)	ENSMUSG00000021669
1450	2.83471	1615	504	Srp14	Signal recognition particle 14 kDa protein (SRP14)	ENSMUSG00000009549
1451	2.83333	631	157	Usp3	Ubiquitin carboxyl-terminal hydrolase 3 (EC 3.1.2.15)(Ubiquitin thioesterase 3)(Ubiquitin-specific-processing protease 3)(Deubiquitinating enzyme 3)	ENSMUSG00000032376
1452	2.83221	744	197	Marcks	Myristoylated alanine-rich C-kinase substrate (MARCKS)	ENSMUSG00000069662
1453	2.83186	220	12	Gng2	Guanine nucleotide-binding protein G(I)/G(S)/G(O) subunit gamma-2 Precursor (G gamma-I)	ENSMUSG00000043004
1454	2.83178	203	6	Rftn1	Raftlin (Raft-linking protein)	ENSMUSG00000039316
1455	2.82822	361	62	Jmjd8	JmjC domain-containing protein 8 (Jumonji domain-containing protein 8)	ENSMUSG00000025736
1456	2.82776	1000	288	Aqp11	Aquaporin-11 (AQP-11)	ENSMUSG00000042797
1457	2.82736	768	206	Gsk3b	Glycogen synthase kinase-3 beta (GSK-3 beta)(EC 2.7.11.26)	ENSMUSG00000022812
1458	2.82716	358	61	2610030H06Rik	UPF0569 transmembrane protein	ENSMUSG00000073131
1459	2.82692	194	3	Pcdh19	Protocadherin-19 Precursor	ENSMUSG00000051323
1460	2.82676	1548	482	Gsr	Glutathione reductase, mitochondrial Precursor (GRase)(GR)(EC 1.8.1.7)	ENSMUSG00000031584
1461	2.82674	1401	430	Mett11d1	Protein RSM22 homolog, mitochondrial Precursor (EC 2.1.1.-)(Methyltransferase 11 domain-containing protein 1)	ENSMUSG00000004561
1462	2.82501	8779	3042	Fn1	Fibronectin Precursor (FN)	ENSMUSG00000026193
1463	2.82432	318	47	A930001N09Rik	UPF0474 protein C5orf41 homolog	ENSMUSG00000048249
1464	2.82407	510	115	Gcc2	GRIP and coiled-coil domain-containing protein 2 (Golgi coiled-coil protein GCC185)	ENSMUSG00000038039
1465	2.82195	1057	309	Txnl1	Thioredoxin-like protein 1 (32 kDa thioredoxin-related protein)	ENSMUSG00000024583
1466	2.81982	526	121	Pnpla2	Patatin-like phospholipase domain-containing protein 2 (EC 3.1.1.3)(Adipose triglyceride lipase)(Desnutrin)	ENSMUSG00000025509
1467	2.81982	213	10	Gadd45b	Growth arrest and DNA-damage-inducible protein GADD45 beta (Myeloid differentiation primary response protein MyD118)(Negative growth regulatory protein MyD118)	ENSMUSG00000015312
1468	2.81579	221	13	Morn2	MORN repeat-containing protein 2 (MORN motif protein in testis)	ENSMUSG00000045257
1469	2.81481	204	7	Hoxa9	Homeobox protein Hox-A9 (Hox-1.7)	ENSMUSG00000038227
1470	2.81169	333	53	Whsc1	Probable histone-lysine N-methyltransferase NSD2 (EC 2.1.1.43)(Nuclear SET domain-containing protein 2)(Wolf-Hirschhorn syndrome candidate 1 protein homolog)	ENSMUSG00000057406
1471	2.81148	243	21	Slc1a5	Neutral amino acid transporter B(0) (ATB(0))(Sodium-dependent neutral amino acid transporter type 2)(Insulin-activated amino acid transporter)(ASC-like Na(+)-dependent neutral amino acid transporter ASCT2)(Solute carrier family 1 member 5)	ENSMUSG00000001918
1472	2.81121	1404	434	Arhgdia	Rho GDP-dissociation inhibitor 1 (Rho GDI 1)(Rho-GDI alpha)(GDI-1)	ENSMUSG00000025132
1473	2.80952	195	4	Tmem132a	Transmembrane protein 132A Precursor (HSPA5-binding protein 1)	ENSMUSG00000024736
1474	2.80909	209	9	Hoxa10	Homeobox protein Hox-A10 (Hox-1.8)	ENSMUSG00000000938
1475	2.80707	773	210	1600012H06Rik	UPF0669 protein C6orf120 homolog Precursor	ENSMUSG00000050088
1476	2.80587	1620	512	Mycbp	C-Myc-binding protein (Associate of Myc 1)(AMY-1)	ENSMUSG00000028647
1477	2.80392	186	1	Gtf3c5	General transcription factor 3C polypeptide 5 (Transcription factor IIIC subunit epsilon)(TF3C-epsilon)(TFIIIC 63 kDa subunit)(TFIIIC63)	ENSMUSG00000026816
1478	2.80365	1899	612	Spnb2	Spectrin beta chain, brain 1 (Spectrin, non-erythroid beta chain 1)(Beta-II spectrin)(Fodrin beta chain)(Embryonic liver fodrin)	ENSMUSG00000020315
1479	2.80342	228	16	Abcc1	Multidrug resistance-associated protein 1 (ATP-binding cassette sub-family C member 1)(Leukotriene C(4) transporter)(LTC4 transporter)	ENSMUSG00000023088
1480	2.80335	570	138	Mknk2	MAP kinase-interacting serine/threonine-protein kinase 2 (EC 2.7.11.1)(MAP kinase signal-integrating kinase 2)(Mnk2)	ENSMUSG00000020190
1481	2.80205	721	192	Cnot2	CCR4-NOT transcription complex subunit 2 (CCR4-associated factor 2)	ENSMUSG00000020166
1482	2.80198	183	0	Shprh	E3 ubiquitin-protein ligase SHPRH (EC 6.3.2.-)(EC 3.6.1.-)(SNF2, histone-linker, PHD and RING finger domain-containing helicase)	ENSMUSG00000039282
1483	2.80165	239	20	Jmjd2b	JmjC domain-containing histone demethylation protein 3B (EC 1.14.11.-)(Jumonji domain-containing protein 2B)	ENSMUSG00000024201
1484	2.80153	267	30	Vwf	von Willebrand factor Precursor (vWF)	ENSMUSG00000001930
1485	2.80137	309	45	Pcnt	Pericentrin	ENSMUSG00000001151
1486	2.8	320	49	Pim1	Proto-oncogene serine/threonine-protein kinase Pim-1 (EC 2.7.11.1)	ENSMUSG00000024014
1487	2.8	530	124	Ddx27	Probable ATP-dependent RNA helicase DDX27 (EC 3.6.1.-)(DEAD box protein 27)	ENSMUSG00000017999
1488	2.8	194	4	Tfb1m	Dimethyladenosine transferase 1, mitochondrial Precursor (EC 2.1.1.-)(S-adenosylmethionine-6-N', N'-adenosyl(rRNA) dimethyltransferase 1)(Mitochondrial 12S rRNA dimethylase 1)(Mitochondrial transcription factor B1)(mtTFB1)	ENSMUSG00000036983
1489	2.79874	790	217	Rhob	Rho-related GTP-binding protein RhoB Precursor	ENSMUSG00000054364
1490	2.79808	773	211	Dync1i2	Cytoplasmic dynein 1 intermediate chain 2 (Cytoplasmic dynein intermediate chain 2)(Dynein intermediate chain 2, cytosolic)(DH IC-2)	ENSMUSG00000027012
1491	2.79739	328	52	Rhobtb3	Rho-related BTB domain-containing protein 3	ENSMUSG00000021589
1492	2.79688	258	27	Nt5e	5'-nucleotidase Precursor (EC 3.1.3.5)(Ecto-5'-nucleotidase)(5'-NT)(CD73 antigen)	ENSMUSG00000032420
1493	2.79675	244	22	Elac2	Zinc phosphodiesterase ELAC protein 2 (EC 3.1.26.11)(Ribonuclease Z 2)(RNase Z 2)(tRNase Z 2)(tRNA 3 endonuclease 2)(ElaC homolog protein 2)	ENSMUSG00000020549
1494	2.79652	1989	646	Ctage5	Cutaneous T-cell lymphoma-associated antigen 5 homolog (Protein cTAGE-5)(Meningioma-expressed antigen 6)	ENSMUSG00000021000
1495	2.79433	294	40	Terf2ip	Telomeric repeat-binding factor 2-interacting protein 1 (TRF2-interacting telomeric protein Rap1)	ENSMUSG00000033430
1496	2.79321	805	223	Usp9x	Probable ubiquitin carboxyl-terminal hydrolase FAF-X (EC 3.1.2.15)(Ubiquitin thioesterase FAF-X)(Ubiquitin-specific-processing protease FAF-X)(Deubiquitinating enzyme FAF-X)(Fat facets protein-related, X-linked)(Ubiquitin-specific protease 9, X chromosome)(Ubiquitin carboxyl-terminal hydrolase FAM)(Fat facets homolog)	ENSMUSG00000031010
1497	2.79245	196	5	AL513352.12-1	Rho GTPase-activating protein 8 (Rho-type GTPase-activating protein 8)	ENSMUSG00000078954
1498	2.79208	182	0	Eif2c2	Eukaryotic translation initiation factor 2C 2 (eIF2C 2)(eIF-2C 2)(Argonaute-2)(Slicer protein)(Piwi/argonaute family protein meIF2C2)	ENSMUSG00000036698
1499	2.79032	246	23	Lphn3	Latrophilin-3 Precursor (Lectomedin-3)	ENSMUSG00000037605
1500	2.78992	232	18	Hspbap1	HSPB1-associated protein 1 (27 KdA heat shock protein-associated protein 1)(Protein associated with small stress protein 1)	ENSMUSG00000022849
1501	2.78841	2114	693	Sfrs6	arginine/serine-rich splicing factor 6	ENSMUSG00000016921
1502	2.7878	1043	309	Fkbp11	FK506-binding protein 11 Precursor (EC 5.2.1.8)(Peptidyl-prolyl cis-trans isomerase)(PPIase)(Rotamase)(19 kDa FK506-binding protein)(FKBP-19)	ENSMUSG00000003355
1503	2.77953	253	26	Trim3	Tripartite motif-containing protein 3 (RING finger protein 22)(RING finger protein HAC1)	ENSMUSG00000036989
1504	2.77848	339	57	Anxa1	Annexin A1 (Annexin-1)(Annexin I)(Lipocortin I)(Calpactin II)(Chromobindin-9)(p35)(Phospholipase A2 inhibitory protein)	ENSMUSG00000024659
1505	2.7767	186	2	Mtmr15	Coiled-coil domain-containing protein MTMR15	ENSMUSG00000033458
1506	2.77572	1249	385	Eif2ak2	Interferon-induced, double-stranded RNA-activated protein kinase (EC 2.7.11.1)(Interferon-inducible RNA-dependent protein kinase)(Eukaryotic translation initiation factor 2-alpha kinase 2)(eIF-2A protein kinase 2)(Protein kinase RNA-activated)(PKR)(p68 kinase)(P1/eIF-2A protein kinase)(Serine/threonine-protein kinase TIK)	ENSMUSG00000024079
1507	2.77419	502	116	Epc1	Enhancer of polycomb homolog 1	ENSMUSG00000024240
1508	2.77222	399	79	Kremen1	Kremen protein 1 Precursor (Kringle-containing protein marking the eye and the nose)(Kringle domain-containing transmembrane protein 1)(Dickkopf receptor)	ENSMUSG00000020393
1509	2.77124	324	52	Adssl1	Adenylosuccinate synthetase isozyme 1 (AMPSase 1)(AdSS 1)(EC 6.3.4.4)(Adenylosuccinate synthetase, muscle isozyme)(IMP--aspartate ligase 1)	ENSMUSG00000011148
1510	2.76871	4820	1676	Sfrs5	Splicing factor, arginine/serine-rich 5 (Pre-mRNA-splicing factor SRP40)(Delayed-early protein HRS)	ENSMUSG00000021134
1511	2.76856	534	128	Yipf2	Protein YIPF2 (YIP1 family member 2)	ENSMUSG00000032182
1512	2.76596	1070	322	Elmo3	Engulfment and cell motility protein 3	ENSMUSG00000014791
1513	2.76582	337	57	Map4k4	Mitogen-activated protein kinase kinase kinase kinase 4 (EC 2.7.11.1)(MAPK/ERK kinase kinase kinase 4)(MEK kinase kinase 4)(MEKKK 4)(HPK/GCK-like kinase HGK)(Nck-interacting kinase)	ENSMUSG00000026074
1514	2.76531	442	95	Rbmx	RNA binding motif protein, X-linked	ENSMUSG00000031134
1515	2.76471	840	239	Tmem134	Transmembrane protein 134	ENSMUSG00000024845
1516	2.76471	370	69	Tcof1	Treacle protein (Treacher Collins syndrome protein homolog)	ENSMUSG00000024613
1517	2.76147	201	8	Dok1	Docking protein 1 (Downstream of tyrosine kinase 1)(p62(dok))	ENSMUSG00000068335
1518	2.75949	336	57	Eny2	Enhancer of yellow 2 transcription factor homolog	ENSMUSG00000022338
1519	2.75862	300	44	Heatr2	HEAT repeat containing 2	ENSMUSG00000025857
1520	2.75676	1532	491	Hmgcr	3-hydroxy-3-methylglutaryl-coenzyme A reductase (HMG-CoA reductase)(EC 1.1.1.34)	ENSMUSG00000021670
1521	2.75676	206	10	Nup188	Nucleoporin NUP188 homolog	ENSMUSG00000052533
1522	2.75625	341	59	Acap2	ARFGAP with coiled-coil, ANK repeat and PH domain-containing protein 2 (Centaurin-beta-2)(Cnt-b2)	ENSMUSG00000049076
1523	2.7561	239	22	Klf3	Krueppel-like factor 3 (Basic krueppel-like factor)(CACCC-box-binding protein BKLF)(TEF-2)	ENSMUSG00000029178
1524	2.7551	305	46	Hisppd2a	Inositol hexakisphosphate and diphosphoinositol-pentakisphosphate kinase 1 (EC 2.7.4.21)(EC 2.7.4.24)(InsP6 and PP-IP5 kinase 1)(Histidine acid phosphatase domain-containing protein 2A)	ENSMUSG00000033526
1525	2.75354	872	252	Smarcc2	SWI/SNF complex subunit SMARCC2 (SWI/SNF-related matrix-associated actin-dependent regulator of chromatin subfamily C member 2)(SWI/SNF complex 170 kDa subunit)(BRG1-associated factor 170)	ENSMUSG00000025369
1526	2.75143	863	249	Hnrnpd	Heterogeneous nuclear ribonucleoprotein D0 (hnRNP D0)(AU-rich element RNA-binding protein 1)	ENSMUSG00000000568
1527	2.74834	315	50	Polr2h	DNA-directed RNA polymerases I, II, and III subunit RPABC3 (RNA polymerases I, II, and III subunit ABC3)(DNA-directed RNA polymerase II subunit H)(RPB17)(RPB8)	ENSMUSG00000021018
1528	2.74701	2886	986	Ndfip2	NEDD4 family-interacting protein 2 Fragment (NEDD4 WW domain-binding protein 5A)	ENSMUSG00000053253
1529	2.74528	482	111	Nono	Non-POU domain-containing octamer-binding protein (NonO protein)	ENSMUSG00000031311
1530	2.74306	295	43	Sema4b	Semaphorin-4B Precursor (Semaphorin-C)(Sema C)	ENSMUSG00000030539
1531	2.74249	539	132	Rnf20	E3 ubiquitin-protein ligase BRE1A (BRE1-A)(EC 6.3.2.-)(RING finger protein 20)	ENSMUSG00000028309
1532	2.74018	807	230	Nrd1	Nardilysin Precursor (EC 3.4.24.61)(N-arginine dibasic convertase)(NRD convertase)(NRD-C)	ENSMUSG00000053510
1533	2.73935	1508	486	Zcchc17	Nucleolar protein of 40 kDa (pNO40)(Zinc finger CCHC domain-containing protein 17)(Putative S1 RNA-binding domain protein)(PS1D protein)	ENSMUSG00000028772
1534	2.73917	2683	915	Snrnp70	U1 small nuclear ribonucleoprotein 70 kDa (U1 snRNP 70 kDa)(snRNP70)	ENSMUSG00000063511
1535	2.7381	360	67	Wdr48	WD repeat-containing protein 48	ENSMUSG00000032512
1536	2.73713	910	268	Tollip	Toll-interacting protein	ENSMUSG00000025139
1537	2.73587	5804	2057	Atf5	Cyclic AMP-dependent transcription factor ATF-5 (Activating transcription factor 5-alpha/beta)(Transcription factor ATFx)(Transcription factor-like protein ODA-10)(BZIP protein ATF7)(NRIF3-associated protein)(NAP1)	ENSMUSG00000038539
1538	2.72926	525	128	Ino80c	INO80 complex subunit C	ENSMUSG00000047989
1539	2.72589	437	96	Hnrnph3	heterogeneous nuclear ribonucleoprotein H3	ENSMUSG00000020069
1540	2.7243	1066	327	Vps11	Vacuolar protein sorting-associated protein 11 homolog	ENSMUSG00000032127
1541	2.72069	689	189	Gpr177	Integral membrane protein GPR177 Precursor (Protein wntless homolog)(Protein evenness interrupted homolog)(EVI)	ENSMUSG00000028173
1542	2.71963	191	6	Emp2	Epithelial membrane protein 2 (EMP-2)(Protein XMP)	ENSMUSG00000022505
1543	2.71779	343	62	Homer2	Homer protein homolog 2 (Homer-2)(Cupidin)(VASP/Ena-related gene up-regulated during seizure and LTP 2)(Vesl-2)	ENSMUSG00000025813
1544	2.71508	386	78	Midn	Midnolin (Midbrain nucleolar protein)	ENSMUSG00000035621
1545	2.71338	326	56	Gatc	GatC-like protein	ENSMUSG00000029536
1546	2.71292	467	108	Ets1	Protein C-ets-1 (p54)	ENSMUSG00000032035
1547	2.71176	361	69	Cirh1a	Cirhin (Testis-expressed gene 292 protein)	ENSMUSG00000041438
1548	2.70866	244	26	Klf1	Krueppel-like factor 1 (Erythroid krueppel-like transcription factor)(EKLF)(Erythroid transcription factor)	ENSMUSG00000054191
1549	2.70858	7568	2730	Cstb	Cystatin-B (Stefin-B)	ENSMUSG00000005054
1550	2.70755	187	5	Armc2	ARMC2_MOUSE Isoform 2 of Q3URY6 - Mus musculus (Mouse)	ENSMUSG00000071324
1551	2.70755	187	5	Adcy9	Adenylate cyclase type 9 (EC 4.6.1.1)(Adenylate cyclase type IX)(ATP pyrophosphate-lyase 9)(Adenylyl cyclase 9)(Adenylyl cyclase type 10)(ACTP10)	ENSMUSG00000005580
1552	2.70681	417	90	Prmt1	Protein arginine N-methyltransferase 1 (EC 2.1.1.-)	ENSMUSG00000052429
1553	2.70567	1426	463	Fkbp8	FK506-binding protein 8 (EC 5.2.1.8)(Peptidyl-prolyl cis-trans isomerase)(PPIase)(Rotamase)(38 kDa FK506-binding protein)(mFKBP38)(FKBPR38)	ENSMUSG00000019428
1554	2.7037	557	142	Bcar1	Breast cancer anti-estrogen resistance protein 1 (CRK-associated substrate)(p130cas)	ENSMUSG00000031955
1555	2.7027	200	10	Ankrd44	Serine/threonine-protein phosphatase 6 regulatory ankyrin repeat subunit B (Serine/threonine-protein phosphatase 6 regulatory subunit ARS-B)(PP6-ARS-B)(Ankyrin repeat domain-containing protein 44)	ENSMUSG00000052331
1556	2.70199	308	50	Fuca2	Plasma alpha-L-fucosidase Precursor (EC 3.2.1.51)(Alpha-L-fucoside fucohydrolase 2)(Alpha-L-fucosidase 2)	ENSMUSG00000019810
1557	2.69903	178	2	Tmem79	Transmembrane protein 79	ENSMUSG00000001420
1558	2.69608	175	1	Kif1a	Kinesin-like protein KIF1A (Axonal transporter of synaptic vesicles)	ENSMUSG00000014602
1559	2.69586	1008	310	BC059842	Novel protein	ENSMUSG00000033253
1560	2.69307	172	0	Folh1	Glutamate carboxypeptidase 2 (EC 3.4.17.21)(Glutamate carboxypeptidase II)(Membrane glutamate carboxypeptidase)(mGCP)(N-acetylated-alpha-linked acidic dipeptidase I)(NAALADase I)(Pteroylpoly-gamma-glutamate carboxypeptidase)(Folylpoly-gamma-glutamate carboxypeptidase)(FGCP)(Folate hydrolase 1)(Prostate-specific membrane antigen homolog)	ENSMUSG00000001773
1561	2.69231	740	211	Ss18	Protein SSXT (Protein SYT)(Synovial sarcoma-associated Ss18-alpha)	ENSMUSG00000037013
1562	2.68975	1842	621	Arl4a	ADP-ribosylation factor-like protein 4A	ENSMUSG00000047446
1563	2.68917	4442	1588	Bnip3	BCL2/adenovirus E1B 19 kDa protein-interacting protein 3	ENSMUSG00000078566
1564	2.68908	540	137	Zbtb44	Zinc finger and BTB domain-containing protein 44 (BTB/POZ domain-containing protein 15)	ENSMUSG00000047412
1565	2.68852	228	21	Plcxd1	Phosphatidylinositol-specific phospholipase C X domain-containing protein 1 (PI-PLC X domain-containing protein 1)	ENSMUSG00000064247
1566	2.68807	193	8	BC011248	UPF0399 protein C6orf153 homolog	ENSMUSG00000023971
1567	2.68794	279	40	Cyb5r1	NADH-cytochrome b5 reductase 1 (b5R.1)(EC 1.6.2.2)(NAD(P)H	ENSMUSG00000026456
1568	2.6875	674	187	Dnttip2	Deoxynucleotidyltransferase terminal-interacting protein 2	ENSMUSG00000039756
1569	2.68571	182	4	Cxcl17	chemokine (C-X-C motif) ligand 17 (Cxcl17), mRNA	ENSMUSG00000060188
1570	2.68519	190	7	Creb1	cAMP response element-binding protein (CREB)	ENSMUSG00000025958
1571	2.68354	324	57	Terf1	Telomeric repeat-binding factor 1 (TTAGGG repeat-binding factor 1)	ENSMUSG00000025925
1572	2.68345	273	38	Rgs10	Regulator of G-protein signaling 10 (RGS10)	ENSMUSG00000030844
1573	2.68182	254	31	Fig4	SAC domain-containing protein 3 (FIG4 homolog)	ENSMUSG00000038417
1574	2.68142	203	12	Psg28	pregnancy-specific glycoprotein 28	ENSMUSG00000030373
1575	2.68103	211	15	Pias1	E3 SUMO-protein ligase PIAS1 (Protein inhibitor of activated STAT protein 1)(DEAD/H box-binding protein 1)	ENSMUSG00000032405
1576	2.68085	278	40	Mipol1	Mirror-image polydactyly gene 1 protein homolog	ENSMUSG00000047022
1577	2.68047	353	68	Dock7	Dedicator of cytokinesis protein 7	ENSMUSG00000028556
1578	2.68	235	24	Urb2	URB2 ribosome biogenesis 2 homolog	ENSMUSG00000031976
1579	2.67895	409	89	Nasp	Nuclear autoantigenic sperm protein (NASP)	ENSMUSG00000028693
1580	2.67839	433	98	Ncoa3	Nuclear receptor coactivator 3 (NCoA-3)(EC 2.3.1.48)(Thyroid hormone receptor activator molecule 1)(TRAM-1)(ACTR)(Receptor-associated coactivator 3)(RAC-3)(Amplified in breast cancer-1 protein homolog)(AIB-1)(Steroid receptor coactivator protein 3)(SRC-3)(CBP-interacting protein)(p/CIP)(pCIP)	ENSMUSG00000027678
1581	2.67826	208	14	Otud7b	zinc finger, A20 domain containing 1	ENSMUSG00000038495
1582	2.67683	339	63	Fndc3a	Fibronectin type-III domain-containing protein 3a	ENSMUSG00000033487
1583	2.67669	612	165	Hspa4	Heat shock 70 kDa protein 4 (Heat shock 70-related protein APG-2)	ENSMUSG00000020361
1584	2.67647	173	1	Cpt1c	Carnitine O-palmitoyltransferase 1, brain isoform (CPT1-B)(EC 2.3.1.21)(Carnitine O-palmitoyltransferase I, brain isoform)(CPTI-B)(Carnitine palmitoyltransferase 1C)(CPT IC)	ENSMUSG00000007783
1585	2.6746	237	25	Leprel2	Prolyl 3-hydroxylase 3 Precursor (EC 1.14.11.7)(Leprecan-like protein 2)(Protein B)	ENSMUSG00000023191
1586	2.67424	253	31	Pth1r	Parathyroid hormone/parathyroid hormone-related peptide receptor Precursor (Parathyroid hormone 1 receptor)(PTH1 receptor)(PTH/PTHrP type I receptor)(PTH/PTHr receptor)	ENSMUSG00000032492
1587	2.67347	817	242	Traf4	TNF receptor-associated factor 4 (Cysteine-rich motif associated to RING and Traf domains protein 1)	ENSMUSG00000017386
1588	2.6732	309	52	Prim1	DNA primase small subunit (EC 2.7.7.-)(DNA primase 49 kDa subunit)(p49)	ENSMUSG00000025395
1589	2.67273	341	64	AI597479	Ashwin	ENSMUSG00000010290
1590	2.67257	202	12	Tbkbp1	TANK-binding kinase 1-binding protein (TBK1-binding protein 1)(Similar to NAP1 TBK1 adapter)	ENSMUSG00000038517
1591	2.67234	528	134	Thrap3	Thyroid hormone receptor-associated protein 3 (Thyroid hormone receptor-associated protein complex 150 kDa component)(Trap150)	ENSMUSG00000043962
1592	2.67213	226	21	Tmprss11d	Transmembrane protease, serine 11D Precursor (EC 3.4.21.-)(Airway trypsin-like protease)(AT)(Adrenal secretory serine protease)(AsP)	ENSMUSG00000061259
1593	2.67114	298	48	Cask	Peripheral plasma membrane protein CASK (EC 2.7.11.1)(Calcium/calmodulin-dependent serine protein kinase)	ENSMUSG00000031012
1594	2.66981	183	5	Mapk6	Mitogen-activated protein kinase 6 (EC 2.7.11.24)(Extracellular signal-regulated kinase 3)(ERK-3)	ENSMUSG00000042688
1595	2.66805	543	140	Rock2	Rho-associated protein kinase 2 (EC 2.7.11.1)(Rho-associated, coiled-coil-containing protein kinase 2)(p164 ROCK-2)	ENSMUSG00000020580
1596	2.66776	711	203	Arhgef10l	Rho guanine nucleotide exchange factor 10-like protein (GrinchGEF)	ENSMUSG00000040964
1597	2.66667	348	67	Pde3b	cGMP-inhibited 3',5'-cyclic phosphodiesterase B (EC 3.1.4.17)(Cyclic GMP-inhibited phosphodiesterase B)(CGI-PDE B)(CGIPDE1)	ENSMUSG00000030671
1598	2.66364	193	9	Dennd4b	DENN domain-containing protein 4B (Brain-specific gene 4 protein)(Brain specific protein 4)	ENSMUSG00000042404
1599	2.66092	2215	769	Hnrnpc	Heterogeneous nuclear ribonucleoproteins C1/C2 (hnRNP C1 / hnRNP C2)	ENSMUSG00000060373
1600	2.65893	1046	330	2310003C23Rik	Protein C20orf11 homolog (Two hybrid-associated protein 1 with RanBPM)(Twa1)	ENSMUSG00000027573
1601	2.65888	469	113	Hps3	Hermansky-Pudlak syndrome 3 protein homolog (Cocoa protein)	ENSMUSG00000027615
1602	2.65766	195	10	Atp6v1d	V-type proton ATPase subunit D (V-ATPase subunit D)(Vacuolar proton pump subunit D)(V-ATPase 28 kDa accessory protein)	ENSMUSG00000021114
1603	2.65696	1999	689	Kdelr1	ER lumen protein retaining receptor 1 (KDEL endoplasmic reticulum protein retention receptor 1)(KDEL receptor 1)	ENSMUSG00000002778
1604	2.65613	2673	943	Hmgn1	Non-histone chromosomal protein HMG-14 (High-mobility group nucleosome-binding domain-containing protein 1)	ENSMUSG00000040681
1605	2.656	232	24	Xylt2	Xylosyltransferase 2 (EC 2.4.2.26)(Xylosyltransferase II)(Peptide O-xylosyltransferase 2)	ENSMUSG00000020868
1606	2.65598	5451	1989	Mttp	Microsomal triglyceride transfer protein large subunit Precursor	ENSMUSG00000028158
1607	2.653	741	216	Nampt	Nicotinamide phosphoribosyltransferase (NAmPRTase)(Nampt)(EC 2.4.2.12)(Pre-B-cell colony-enhancing factor 1 homolog)(PBEF)(Visfatin)	ENSMUSG00000020572
1608	2.65041	226	22	Coro2a	Coronin-2A	ENSMUSG00000028337
1609	2.64794	1314	433	Uqcrc1	Cytochrome b-c1 complex subunit 1, mitochondrial Precursor (Ubiquinol-cytochrome-c reductase complex core protein 1)(Core protein I)(Complex III subunit 1)	ENSMUSG00000025651
1610	2.64754	223	21	Cpne3	Copine-3 (Copine III)	ENSMUSG00000028228
1611	2.64706	170	1	Tcfcp2l1	Transcription factor CP2-like protein 1 (CP2-related transcriptional repressor 1)(CRTR-1)	ENSMUSG00000026380
1612	2.64626	289	46	Uchl5	Ubiquitin carboxyl-terminal hydrolase isozyme L5 (UCH-L5)(EC 3.4.19.12)(Ubiquitin thioesterase L5)(Ubiquitin C-terminal hydrolase UCH37)	ENSMUSG00000018189
1613	2.64602	498	125	Copz2	Coatomer subunit zeta-2 (Zeta-2-coat protein)(Zeta-2 COP)	ENSMUSG00000018672
1614	2.64545	482	119	Tsr2	Pre-rRNA-processing protein TSR2 homolog	ENSMUSG00000025264
1615	2.64516	310	54	Nr1h2	Oxysterols receptor LXR-beta (Liver X receptor beta)(Nuclear orphan receptor LXR-beta)(Nuclear receptor subfamily 1 group H member 2)(Ubiquitously-expressed nuclear receptor)(Retinoid X receptor-interacting protein No.15)	ENSMUSG00000060601
1616	2.64423	175	3	Celsr2	Cadherin EGF LAG seven-pass G-type receptor 2 Precursor (Flamingo 1)(mFmi1)	ENSMUSG00000068740
1617	2.63462	174	3	Mmp15	Matrix metalloproteinase-15 Precursor (MMP-15)(EC 3.4.24.-)(Membrane-type matrix metalloproteinase 2)(MT-MMP 2)(MTMMP2)(Membrane-type-2 matrix metalloproteinase)(MT2-MMP)(MT2MMP)	ENSMUSG00000031790
1618	2.63422	1686	577	Sec13	Protein SEC13 homolog (SEC13-related protein)(SEC13-like protein 1)	ENSMUSG00000030298
1619	2.63309	998	316	Tmem38b	Trimeric intracellular cation channel type B (TRIC-B)(TRICB)(Transmembrane protein 38B)(Mitsugumin-33B)	ENSMUSG00000028420
1620	2.63107	171	2	Fbxo15	F-box only protein 15	ENSMUSG00000034391
1621	2.63006	1265	418	Tulp4	Tubby-related protein 4 (Tubby-like protein 4)(Tubby superfamily protein)	ENSMUSG00000034377
1622	2.62979	518	134	Unc84a	Protein unc-84 homolog A (Sad1/unc-84 protein-like 1)	ENSMUSG00000036817
1623	2.62927	439	104	Prpf4b	Serine/threonine-protein kinase PRP4 homolog (EC 2.7.11.1)(PRP4 pre-mRNA-processing factor 4 homolog)(Pre-mRNA protein kinase)	ENSMUSG00000021413
1624	2.6259	265	38	Pemt	Phosphatidylethanolamine N-methyltransferase (PEAMT)(PEMT)(EC 2.1.1.17)(PEMT2)	ENSMUSG00000000301
1625	2.62439	976	309	Jund	Transcription factor jun-D	ENSMUSG00000071076
1626	2.6242	312	56	Dnajc25	DnaJ homolog subfamily C member 25	ENSMUSG00000070972
1627	2.62376	165	0	Evi5l	ecotropic viral integration site 5 like	ENSMUSG00000011832
1628	2.62376	165	0	Cd320	CD320 antigen Precursor (Transcobalamin receptor)(TCblR)(CD320 antigen)	ENSMUSG00000002308
1629	2.62275	338	66	Bhlhb9	Protein BHLHB9 (bHLHB9)	ENSMUSG00000072964
1630	2.62264	178	5	Ly96	Lymphocyte antigen 96 Precursor (Protein MD-2)(ESOP-1)	ENSMUSG00000025779
1631	2.62046	694	202	1110007A13Rik	UPF0557 protein C10orf119 homolog	ENSMUSG00000048170
1632	2.62037	183	7	Cish	Cytokine-inducible SH2-containing protein (CIS)(CIS-1)(Suppressor of cytokine signaling)(SOCS)	ENSMUSG00000032578
1633	2.61922	1317	440	Golgb1	Golgb1 protein	ENSMUSG00000034243
1634	2.61847	4409	1621	Csnk1a1	Casein kinase I isoform alpha (CKI-alpha)(EC 2.7.11.1)(CK1)	ENSMUSG00000024576
1635	2.61765	167	1	Wdr55	WD repeat-containing protein 55	ENSMUSG00000042660
1636	2.61765	167	1	Plcl1	Inactive phospholipase C-like protein 1 (PLC-L1)(Phospholipase C-related but catalytically inactive protein)(PRIP)	ENSMUSG00000038349
1637	2.61682	180	6	1500019G21Rik	Hsp70-binding protein 1 (Heat shock protein-binding protein 1)(HspBP1)(Hsp70-interacting protein 1)	ENSMUSG00000063802
1638	2.61607	193	11	AC151288.3	N-acylneuraminate-9-phosphatase (EC 3.1.3.29)(Neu5Ac-9-Pase)(Haloacid dehalogenase-like hydrolase domain-containing protein 4)	ENSMUSG00000043346
1639	2.61603	520	136	Plcl2	Inactive phospholipase C-like protein 2 (Phospholipase C-L2)(PLC-L2)(PLC-L(2))(Phospholipase C epsilon 2)	ENSMUSG00000038910
1640	2.61538	206	16	Dirc2	Disrupted in renal carcinoma protein 2 homolog	ENSMUSG00000022848
1641	2.61468	185	8	Ier3	Radiation-inducible immediate-early gene IEX-1 (Immediate early protein GLY96)(Immediate early response 3 protein)	ENSMUSG00000003541
1642	2.60839	273	42	Ints6	Integrator complex subunit 6 (Int6)(Protein DDX26)(DBI-1)	ENSMUSG00000035161
1643	2.60784	166	1	Gabrp	Gamma-aminobutyric acid receptor subunit pi Precursor (GABA(A) receptor subunit pi)	ENSMUSG00000020159
1644	2.60748	179	6	2610019A05Rik	STE20-related kinase adapter protein alpha (STRAD alpha)(STE20-related adapter protein)	ENSMUSG00000069631
1645	2.60631	1469	501	Arl6ip4	ADP-ribosylation factor-like protein 6-interacting protein 4 (ARL-6-interacting protein 4)(Aip-4)	ENSMUSG00000029404
1646	2.60606	244	31	Luzp1	Leucine zipper protein 1 (Leucine zipper motif-containing protein)	ENSMUSG00000001089
1647	2.60377	176	5	Sobp	Sine oculis-binding protein homolog (Jackson circler protein 1)	ENSMUSG00000038248
1648	2.60377	176	5	Dlg5	Dlg5 protein	ENSMUSG00000021782
1649	2.60219	613	173	Nkap	NF-kappa-B-activating protein	ENSMUSG00000016409
1650	2.6	186	9	Angel1	Protein angel homolog 1	ENSMUSG00000021257
1651	2.59701	248	33	Ube2h	Ubiquitin-conjugating enzyme E2 H (EC 6.3.2.19)(Ubiquitin-protein ligase H)(Ubiquitin carrier protein H)(UBCH2)(E2-20K)	ENSMUSG00000039159
1652	2.59615	170	3	Tbc1d10a	TBC1 domain family member 10A (EBP50-PDX interactor of 64 kDa)(EPI64 protein)	ENSMUSG00000034412
1653	2.59504	214	20	Elp4	Elongator complex protein 4 (PAX6 neighbor gene protein)	ENSMUSG00000027167
1654	2.59444	367	79	Mllt10	Protein AF-10	ENSMUSG00000026743
1655	2.59375	481	123	Usp33	ubiquitin specific protease 33 isoform 1	ENSMUSG00000025437
1656	2.59292	193	12	Col6a2	Collagen alpha-2(VI) chain Precursor	ENSMUSG00000020241
1657	2.59137	921	293	Ncor1	Nuclear receptor corepressor 1 (N-CoR1)(N-CoR)(Retinoid X receptor-interacting protein 13)(RIP13)	ENSMUSG00000018501
1658	2.58974	203	16	Kif16b	kinesin family member 16B	ENSMUSG00000038844
1659	2.58915	568	157	Nbr1	Next to BRCA1 gene 1 protein (Neighbor of BRCA1 gene 1 protein)(Membrane component, chromosome 17, surface marker 2)	ENSMUSG00000017119
1660	2.58879	177	6	Saps2	Serine/threonine-protein phosphatase 6 regulatory subunit 2 (SAPS domain family member 2)	ENSMUSG00000036561
1661	2.58876	775	237	Qk	Protein quaking (MqkI)(qkI)	ENSMUSG00000062078
1662	2.58779	239	30	Prps1	Ribose-phosphate pyrophosphokinase 1 (EC 2.7.6.1)(Phosphoribosyl pyrophosphate synthetase I)(PRS-I)	ENSMUSG00000031432
1663	2.58716	182	8	Cyba	Cytochrome b-245 light chain (p22 phagocyte B-cytochrome)(Neutrophil cytochrome b 22 kDa polypeptide)(p22-phox)(p22phox)(Cytochrome b(558) alpha chain)(Cytochrome b558 subunit alpha)(Superoxide-generating NADPH oxidase light chain subunit)	ENSMUSG00000006519
1664	2.58621	200	15	Pank4	Pantothenate kinase 4 (EC 2.7.1.33)(Pantothenic acid kinase 4)(mPanK4)	ENSMUSG00000029056
1665	2.58416	161	0	Atp6v1b1	ATPase, H+ transporting, lysosomal V1 subunit B1	ENSMUSG00000006269
1666	2.58036	189	11	Qtrt1	Queuine tRNA-ribosyltransferase (EC 2.4.2.29)(tRNA-guanine transglycosylase)(Guanine insertion enzyme)	ENSMUSG00000002825
1667	2.58015	238	30	Ticam1	TIR domain-containing adapter molecule 1 (TICAM-1)(Toll-interleukin 1 receptor domain-containing adapter protein inducing interferon-beta)(TIR domain-containing adapter protein inducing IFN-beta)	ENSMUSG00000047123
1668	2.58015	238	30	Nme4	Nucleoside diphosphate kinase, mitochondrial Precursor (NDP kinase, mitochondrial)(NDK)(EC 2.7.4.6)(nm23-M4)(Nucleoside diphosphate kinase D)(NDPKD)	ENSMUSG00000024177
1669	2.57983	207	18	Sufu	Suppressor of fused homolog	ENSMUSG00000025231
1670	2.57857	261	39	Spen	Msx2-interacting protein (SPEN homolog)(SMART/HDAC1-associated repressor protein)	ENSMUSG00000040761
1671	2.57843	163	1	Myom1	Myomesin-1 (Myomesin family member 1)(Skelemin)	ENSMUSG00000024049
1672	2.57658	186	10	Ppp2r5b	protein phosphatase 2, regulatory subunit B (B56), beta isoform	ENSMUSG00000024777
1673	2.57597	629	182	Fcer1g	High affinity immunoglobulin epsilon receptor subunit gamma Precursor (IgE Fc receptor subunit gamma)(FceRI gamma)(Fc-epsilon RI-gamma)	ENSMUSG00000058715
1674	2.57547	992	323	Tpm4	Tropomyosin alpha-4 chain (Tropomyosin-4)	ENSMUSG00000031799
1675	2.57273	183	9	Ccrl2	C-C chemokine receptor-like 2 (Lipopolysacharide-inducible C-C chemokine receptor)(L-CCR)(G-protein coupled beta chemokine receptor)(Chemokine receptor CCR11)	ENSMUSG00000043953
1676	2.57241	273	44	Rassf5	Ras association domain-containing protein 5 (New ras effector 1)(Regulator for cell adhesion and polarization enriched in lymphoid tissues)(RAPL)	ENSMUSG00000026430
1677	2.57143	278	46	Heatr6	HEAT repeat-containing protein 6	ENSMUSG00000000976
1678	2.57143	926	298	Ndst1	Bifunctional heparan sulfate N-deacetylase/N-sulfotransferase 1 (EC 2.8.2.8)(Glucosaminyl N-deacetylase/N-sulfotransferase 1)(NDST-1)(	ENSMUSG00000054008
1679	2.56981	1943	694	Hemk1	HemK methyltransferase family member 1 (EC 2.1.1.-)	ENSMUSG00000032579
1680	2.5679	316	61	Setd5	SET domain-containing protein 5	ENSMUSG00000034269
1681	2.5678	203	17	Itfg1	T-cell immunomodulatory protein Precursor (Protein TIP)(Integrin-alpha FG-GAP repeat-containing protein 1)	ENSMUSG00000031703
1682	2.56716	244	33	Itpka	Inositol-trisphosphate 3-kinase A (EC 2.7.1.127)(Inositol 1,4,5-trisphosphate 3-kinase A)(IP3 3-kinase A)(IP3K A)	ENSMUSG00000027296
1683	2.56637	190	12	Sfrs8	splicing factor, arginine/serine-rich 8	ENSMUSG00000029439
1684	2.56637	190	12	2310079F23Rik	Putative methyltransferase UPF0383 (EC 2.1.1.-)	ENSMUSG00000029097
1685	2.56494	295	53	Pols	DNA polymerase sigma (EC 2.7.7.7)	ENSMUSG00000034575
1686	2.56494	295	53	Mllt1	myeloid/lymphoid or mixed-lineage leukemia (trithorax homolog, Drosophila); translocated to, 1	ENSMUSG00000024212
1687	2.5625	351	75	Map3k12	Mitogen-activated protein kinase kinase kinase 12 (EC 2.7.11.25)(Mixed lineage kinase)(Leucine-zipper protein kinase)(ZPK)(Dual leucine zipper bearing kinase)(DLK)(MAPK-upstream kinase)(MUK)	ENSMUSG00000023050
1688	2.55597	1978	712	Ell2	RNA polymerase II elongation factor ELL2	ENSMUSG00000001542
1689	2.55459	485	128	Tmem57	Macoilin (Transmembrane protein 57)(Brain-specific adaptor protein C61)	ENSMUSG00000028826
1690	2.55357	329	67	Prkab1	5'-AMP-activated protein kinase subunit beta-1 (AMPK beta-1 chain)(AMPKb)	ENSMUSG00000029513
1691	2.55224	242	33	Zfp687	Zinc finger protein 687	ENSMUSG00000019338
1692	2.55172	196	15	Arid1b	AT rich interactive domain 1B (SWI-like) (Arid1b), mRNA	ENSMUSG00000069729
1693	2.55172	344	73	Mxd4	Max-interacting transcriptional repressor MAD4 (Max-associated protein 4)(MAX dimerization protein 4)	ENSMUSG00000037235
1694	2.54909	601	174	Cirbp	Cold-inducible RNA-binding protein (Glycine-rich RNA-binding protein CIRP)(A18 hnRNP)	ENSMUSG00000045193
1695	2.54762	328	67	Psph	Phosphoserine phosphatase (PSPase)(PSP)(EC 3.1.3.3)(O-phosphoserine phosphohydrolase)	ENSMUSG00000029446
1696	2.54706	333	69	Actr1b	Beta-centractin (Actin-related protein 1B)(ARP1B)	ENSMUSG00000037351
1697	2.54615	231	29	Fem1b	Protein fem-1 homolog B (FEM1-beta)(FEM1b)(Fem-1-like death receptor-binding protein alpha)(F1A-alpha)(mt-Fem)	ENSMUSG00000032244
1698	2.54491	325	66	Dennd5b	DENN domain-containing protein 5B (RAB6IP1-like protein)	ENSMUSG00000030313
1699	2.54455	157	0	Slc30a2	solute carrier family 30 (zinc transporter), member 2	ENSMUSG00000028836
1700	2.54369	162	2	Slc7a5	Large neutral amino acids transporter small subunit 1 (L-type amino acid transporter 1)(Solute carrier family 7 member 5)(4F2 light chain)(4F2 LC)(4F2LC)	ENSMUSG00000040010
1701	2.54331	546	153	Appl2	DCC-interacting protein 13-beta (Dip13-beta)(Adapter protein containing PH domain, PTB domain and leucine zipper motif 2)	ENSMUSG00000020263
1702	2.54098	520	143	Ube4a	ubiquitination factor E4A	ENSMUSG00000059890
1703	2.54093	2042	742	Vkorc1	Vitamin K epoxide reductase complex subunit 1 (EC 1.1.4.1)(Vitamin K1 2,3-epoxide reductase subunit 1)	ENSMUSG00000030804
1704	2.53968	220	25	4933411K20Rik	UPF0501 protein KIAA1430	ENSMUSG00000031631
1705	2.53939	319	64	Pus1	tRNA pseudouridine synthase A (EC 5.4.99.12)(tRNA-uridine isomerase I)(tRNA pseudouridylate synthase I)	ENSMUSG00000029507
1706	2.53704	174	7	Tceb3	Transcription elongation factor B polypeptide 3 (RNA polymerase II transcription factor SIII subunit A)(SIII p110)(Elongin-A)(EloA)(Elongin 110 kDa subunit)	ENSMUSG00000028668
1707	2.53704	174	7	Dync2li1	Cytoplasmic dynein 2 light intermediate chain 1 (mD2LIC)	ENSMUSG00000024253
1708	2.53689	519	143	Ppp1r2	Protein phosphatase inhibitor 2 (IPP-2)	ENSMUSG00000047714
1709	2.53676	245	35	Helz	Probable helicase with zinc finger domain (EC 3.6.1.-)	ENSMUSG00000020721
1710	2.53333	356	79	Plekha1	Pleckstrin homology domain-containing family A member 1 (Tandem PH domain-containing protein 1)(TAPP-1)	ENSMUSG00000040268
1711	2.53097	186	12	Cdkl2	Cyclin-dependent kinase-like 2 (EC 2.7.11.22)(Serine/threonine-protein kinase KKIAMRE)	ENSMUSG00000029403
1712	2.5307	10038	3905	Atp5j	ATP synthase-coupling factor 6, mitochondrial Precursor (ATPase subunit F6)	ENSMUSG00000022890
1713	2.52922	679	207	BC056474	UPF0139 membrane protein C19orf56 homolog	ENSMUSG00000059355
1714	2.528	216	24	Alg3	Dolichyl-P-Man	ENSMUSG00000033809
1715	2.527	2988	1121	Mut	Methylmalonyl-CoA mutase, mitochondrial Precursor (MCM)(EC 5.4.99.2)(Methylmalonyl-CoA isomerase)	ENSMUSG00000023921
1716	2.52586	193	15	Crtap	Cartilage-associated protein Precursor	ENSMUSG00000032431
1717	2.52475	155	0	Zfp618	Zinc finger protein 618	ENSMUSG00000028358
1718	2.52475	155	0	Mcm6	DNA replication licensing factor MCM6 (Mis5 homolog)	ENSMUSG00000026355
1719	2.52427	160	2	Morn4	MORN repeat-containing protein 4	ENSMUSG00000049670
1720	2.52402	478	128	Orai1	Calcium release-activated calcium channel protein 1 (Protein orai-1)(Transmembrane protein 142A)	ENSMUSG00000049686
1721	2.52116	853	277	Sumo1	Small ubiquitin-related modifier 1 Precursor (SUMO-1)(Ubiquitin-like protein SMT3C)(SMT3 homolog 3)(Ubiquitin-homology domain protein PIC1)	ENSMUSG00000026021
1722	2.52096	321	66	Zfyve16	Zinc finger FYVE domain-containing protein 16 (Endofin)(Endosomal-associated FYVE domain protein)	ENSMUSG00000021706
1723	2.51656	280	50	Mto1	Protein MTO1 homolog, mitochondrial Precursor	ENSMUSG00000032342
1724	2.51562	222	27	Cenpj	Centromere protein J (CENP-J)	ENSMUSG00000064128
1725	2.51515	232	31	Lzts2	Leucine zipper putative tumor suppressor 2	ENSMUSG00000035342
1726	2.51367	13049	5130	Tmsb4x	Thymosin beta-4 (T beta 4)	ENSMUSG00000049775
1727	2.51327	184	12	Spib	Transcription factor Spi-B	ENSMUSG00000008193
1728	2.51253	802	258	1810013L24Rik	UPF0472 protein C16orf72 homolog	ENSMUSG00000022507
1729	2.51096	5399	2089	Mylc2b	Myosin regulatory light chain MRLC2 (Myosin regulatory light chain 2-B, smooth muscle isoform)	ENSMUSG00000034868
1730	2.51007	1022	346	Pum2	Pumilio homolog 2	ENSMUSG00000020594
1731	2.50993	279	50	Ap1s1	AP-1 complex subunit sigma-1A (Adapter-related protein complex 1 sigma-1A subunit)(Adaptor protein complex AP-1 sigma-1A subunit)(Sigma-adaptin 1A)(Sigma1A-adaptin)(Golgi adaptor HA1/AP1 adaptin sigma-1A subunit)(HA1 19 kDa subunit)(Clathrin assembly protein complex 1 sigma-1A small chain)(Clathrin coat assembly protein AP19)(Sigma 1a subunit of AP-1 clathrin)	ENSMUSG00000004849
1732	2.50855	487	133	Pkp4	Plakophilin-4 (Armadillo-related protein)	ENSMUSG00000026991
1733	2.50758	231	31	Wipf1	WAS/WASL-interacting protein family member 1 (Wiskott-Aldrich syndrome protein-interacting protein)(WASP-interacting protein)	ENSMUSG00000075284
1734	2.50737	1091	374	Palmd	Palmdelphin	ENSMUSG00000033377
1735	2.50495	153	0	Dnajc18	DnaJ homolog subfamily C member 18	ENSMUSG00000024350
1736	2.50485	932	311	Pim3	Serine/threonine-protein kinase Pim-3 (EC 2.7.11.1)	ENSMUSG00000035828
1737	2.50476	163	4	Cdh22	Cadherin-22 Precursor (Pituitary and brain cadherin)(PB-cadherin)	ENSMUSG00000053166
1738	2.50476	163	4	Sorbs1	Sorbin and SH3 domain-containing protein 1 (Ponsin)(c-Cbl-associated protein)(CAP)(SH3 domain protein 5)(SH3P12)	ENSMUSG00000025006
1739	2.50394	218	26	Ofd1	Oral-facial-digital syndrome 1 protein homolog	ENSMUSG00000040586
1740	2.50394	854	280	Pla2g7	Platelet-activating factor acetylhydrolase Precursor (PAF acetylhydrolase)(EC 3.1.1.47)(PAF 2-acylhydrolase)(LDL-associated phospholipase A2)(LDL-PLA(2))(2-acetyl-1-alkylglycerophosphocholine esterase)(1-alkyl-2-acetylglycerophosphocholine esterase)	ENSMUSG00000023913
1741	2.50282	343	76	2310065K24Rik	NEFA-interacting nuclear protein NIP30	ENSMUSG00000031774
1742	2.5027	363	84	Slu7	Pre-mRNA-splicing factor SLU7	ENSMUSG00000020409
1743	2.5	165	5	Gabbr1	Gamma-aminobutyric acid type B receptor subunit 1 Precursor (GABA-B receptor 1)(GABA-B-R1)(Gb1)	ENSMUSG00000024462
1744	2.5	215	25	Rnf19a	E3 ubiquitin-protein ligase RNF19A (EC 6.3.2.-)(RING finger protein 19A)(Double ring-finger protein)(Dorfin)(XY body protein)(XYbp)(Gametogenesis-expressed protein GEG-154)(UBCM4-interacting protein 117)(UIP117)	ENSMUSG00000022280
1745	2.5	180	11	Cdc73	Parafibromin (Cell division cycle protein 73 homolog)(Hyperparathyroidism 2 protein homolog)	ENSMUSG00000026361
1746	2.49714	337	74	Hook2	Protein Hook homolog 2	ENSMUSG00000052566
1747	2.4963	237	34	Dnajb14	DnaJ homolog subfamily B member 14	ENSMUSG00000074212
1748	2.4958	197	18	Plp2	Proteolipid protein 2	ENSMUSG00000031146
1749	2.49398	314	65	Ruvbl1	RuvB-like 1 (EC 3.6.1.-)(49 kDa TATA box-binding protein-interacting protein)(49 kDa TBP-interacting protein)(TIP49a)(Pontin 52)(DNA helicase p50)	ENSMUSG00000030079
1750	2.49167	797	259	Tspan4	Tetraspanin-4 (Tspan-4)(Transmembrane 4 superfamily member 7)	ENSMUSG00000025511
1751	2.49074	169	7	Aldh1l2	Probable 10-formyltetrahydrofolate dehydrogenase ALDH1L2 (EC 1.5.1.6)(Aldehyde dehydrogenase family 1 member L2)	ENSMUSG00000020256
1752	2.49	647	199	Gfm1	Elongation factor G 1, mitochondrial Precursor (mEF-G 1)(Elongation factor G1)	ENSMUSG00000027774
1753	2.4881	318	67	Pea15a	Astrocytic phosphoprotein PEA-15	ENSMUSG00000013698
1754	2.48503	315	66	Psen1	Presenilin-1 (PS-1)(EC 3.4.23.-)(Protein S182)	ENSMUSG00000019969
1755	2.48387	285	54	Iqsec1	IQ motif and SEC7 domain-containing protein 1	ENSMUSG00000034312
1756	2.48361	506	143	Scyl3	Protein-associating with the carboxyl-terminal domain of ezrin (Ezrin-binding protein PACE-1)(SCY1-like protein 3)	ENSMUSG00000026584
1757	2.48299	630	193	Myst1	Probable histone acetyltransferase MYST1 (MYST protein 1)(EC 2.3.1.48)(MOZ, YBF2/SAS3, SAS2 and TIP60 protein 1)	ENSMUSG00000030801
1758	2.48276	260	44	Ccdc80	Coiled-coil domain-containing protein 80 Precursor (Up-regulated in BRS-3 deficient mouse)	ENSMUSG00000022665
1759	2.48187	379	92	Dnm1l	Dynamin-1-like protein (EC 3.6.5.5)(Dynamin-related protein 1)(Dynamin family member proline-rich carboxyl-terminal domain less)(Dymple)	ENSMUSG00000022789
1760	2.48182	173	9	Cd200	OX-2 membrane glycoprotein Precursor (MRC OX-2 antigen)(CD200 antigen)	ENSMUSG00000022661
1761	2.47917	257	43	Cand1	Cullin-associated NEDD8-dissociated protein 1 (Cullin-associated and neddylation-dissociated protein 1)(p120 CAND1)	ENSMUSG00000020114
1762	2.47849	361	85	Grlf1	Glucocorticoid receptor DNA-binding factor 1	ENSMUSG00000058230
1763	2.47821	6668	2630	Ppib	Peptidyl-prolyl cis-trans isomerase B Precursor (PPIase)(Rotamase)(EC 5.2.1.8)(Cyclophilin B)(S-cyclophilin)(SCYLP)(CYP-S1)	ENSMUSG00000032383
1764	2.47647	321	69	Nhlrc2	NHL repeat-containing protein 2	ENSMUSG00000025078
1765	2.472	209	24	Ablim3	Actin-binding LIM protein 3 (Actin-binding LIM protein family member 3)(abLIM-3)	ENSMUSG00000032735
1766	2.47159	335	75	Gtf3c6	General transcription factor 3C polypeptide 6 (Transcription factor IIIC subunit 6)(TFIIIC 35 kDa subunit)(TFIIIC35)	ENSMUSG00000019837
1767	2.47016	1597	586	Son	SON protein	ENSMUSG00000022961
1768	2.46973	2103	791	Papd5	PAP-associated domain-containing protein 5 (EC 2.7.7.-)(Topoisomerase-related function protein 4-2)(TRF4-2)	ENSMUSG00000036779
1769	2.46912	1979	741	4931406C07Rik	Ester hydrolase C11orf54 homolog (EC 3.1.-.-)	ENSMUSG00000031938
1770	2.46865	648	202	Fxr1	Fragile X mental retardation syndrome-related protein 1 (mFxr1p)	ENSMUSG00000027680
1771	2.46821	327	72	Ppp2r5c	Serine/threonine-protein phosphatase 2A 56 kDa regulatory subunit gamma isoform (PP2A, B subunit, B' gamma isoform)(PP2A, B subunit, B56 gamma isoform)(PP2A, B subunit, PR61 gamma isoform)(PP2A, B subunit, R5 gamma isoform)(PP2A, B subunit, B'alpha3 isoform)	ENSMUSG00000017843
1772	2.46715	238	36	Foxp1	Forkhead box protein P1 (Forkhead-related transcription factor 1)	ENSMUSG00000030067
1773	2.46535	149	0	Tm7sf4	Transmembrane 7 superfamily member 4 (Dendritic cell-specific transmembrane protein)(DC-STAMP)	ENSMUSG00000022303
1774	2.46429	176	11	Mcm2	DNA replication licensing factor MCM2 (Minichromosome maintenance protein 2 homolog)(Nuclear protein BM28)	ENSMUSG00000002870
1775	2.46218	193	18	Snrnp200	U5 snRNP-specific protein, 200 kDa	ENSMUSG00000003660
1776	2.46078	151	1	Mapksp1	Mitogen-activated protein kinase scaffold protein 1 (Mitogen-activated protein kinase kinase 1-interacting protein 1)(MEK-binding partner 1)(Mp1)	ENSMUSG00000059039
1777	2.4577	13931	5608	Rpl8	60S ribosomal protein L8	ENSMUSG00000003970
1778	2.45714	158	4	Nexn	Nexilin (F-actin binding protein)	ENSMUSG00000039103
1779	2.45703	529	155	Tmem87b	Transmembrane protein 87B Precursor	ENSMUSG00000014353
1780	2.45679	298	61	Etv6	Transcription factor ETV6 (ETS translocation variant 6)(ETS-related protein Tel1)(Tel)	ENSMUSG00000030199
1781	2.45669	212	26	6720456H20Rik	UPF0679 protein C14orf101 homolog	ENSMUSG00000036339
1782	2.45652	239	37	Cdc2l6	Cell division cycle 2-like protein kinase 6 (EC 2.7.11.22)(CDC2-related protein kinase 6)	ENSMUSG00000038481
1783	2.45455	170	9	Cyfip2	Cytoplasmic FMR1-interacting protein 2 (p53-inducible protein 121)	ENSMUSG00000020340
1784	2.45399	300	62	Zfx	Zinc finger X-chromosomal protein	ENSMUSG00000079509
1785	2.4537	165	7	Mapkapk3	MAP kinase-activated protein kinase 3 (MAPK-activated protein kinase 3)(MAPKAP kinase 3)(MAPKAPK-3)(EC 2.7.11.1)	ENSMUSG00000032577
1786	2.4537	430	115	4930471M23Rik	Transmembrane protein C2orf18 homolog Precursor	ENSMUSG00000029175
1787	2.45119	1030	360	Ptp4a1	Protein tyrosine phosphatase type IVA 1 (EC 3.1.3.48)(Protein-tyrosine phosphatase 4a1)(Protein-tyrosine phosphatase of regenerating liver 1)(PRL-1)	ENSMUSG00000026064
1788	2.45116	427	114	Grina	Glutamate	ENSMUSG00000022564
1789	2.45098	275	52	Tmem50b	Transmembrane protein 50B	ENSMUSG00000022964
1790	2.45038	221	30	Atn1	Atrophin-1 (Dentatorubral-pallidoluysian atrophy protein homolog)	ENSMUSG00000004263
1791	2.44975	875	297	Dusp1	Dual specificity protein phosphatase 1 (EC 3.1.3.48)(EC 3.1.3.16)(MAP kinase phosphatase 1)(MKP-1)(Protein-tyrosine phosphatase 3CH134)(Protein-tyrosine phosphatase ERP)	ENSMUSG00000024190
1792	2.44948	603	186	Cisd2	CDGSH iron sulfur domain-containing protein 2 (MitoNEET-related 1 protein)(Miner1)(Nervous system over-expressed protein 70)	ENSMUSG00000028165
1793	2.44828	397	102	Fanci	Fanconi anemia group I protein homolog (Protein FANCI)	ENSMUSG00000039187
1794	2.44693	338	78	Mrpl11	39S ribosomal protein L11, mitochondrial Precursor (L11mt)(MRP-L11)	ENSMUSG00000024902
1795	2.44643	174	11	Sgtb	Small glutamine-rich tetratricopeptide repeat-containing protein beta (Beta-SGT)	ENSMUSG00000042743
1796	2.44628	492	141	Tsfm	Elongation factor Ts, mitochondrial Precursor (EF-TsMt)(EF-Ts)	ENSMUSG00000040521
1797	2.44444	758	250	Foxa2	Hepatocyte nuclear factor 3-beta (HNF-3-beta)(HNF-3B)(Forkhead box protein A2)	ENSMUSG00000037025
1798	2.44444	186	16	Ppm1h	Protein phosphatase 1H (EC 3.1.3.16)	ENSMUSG00000034613
1799	2.44365	1960	742	Ppp1r14b	Protein phosphatase 1 regulatory subunit 14B (Phosphatase holoenzyme inhibitor 1)(PHI-1)(Phospholipase C beta 3 neighbouring gene protein)	ENSMUSG00000056612
1800	2.44365	2285	875	Cebpa	CCAAT/enhancer-binding protein alpha (C/EBP alpha)	ENSMUSG00000034957
1801	2.44091	437	119	Aqp7	Aquaporin-7 (AQP-7)	ENSMUSG00000028427
1802	2.43925	161	6	Ubox5	RING finger protein 37 (Ubiquitin-conjugating enzyme 7-interacting protein 5)(UbcM4-interacting protein 5)(U-box domain-containing protein 5)	ENSMUSG00000027300
1803	2.43671	285	57	Fam108a	Abhydrolase domain-containing protein FAM108A Precursor (EC 3.-.-.-)	ENSMUSG00000003346
1804	2.43421	455	127	5033413D22Rik	Coiled-coil domain-containing protein C6orf185 homolog	ENSMUSG00000075225
1805	2.43333	192	19	Itgae	Integrin alpha-E Precursor (Integrin alpha M290)(CD103 antigen)	ENSMUSG00000005947
1806	2.43137	272	52	Stambp	STAM-binding protein (EC 3.1.2.15)(Associated molecule with the SH3 domain of STAM)	ENSMUSG00000006906
1807	2.43137	1016	358	Tusc2	Tumor suppressor candidate 2 (PDGFA-associated protein 2)(Fusion 1 protein)(Fus-1 protein)	ENSMUSG00000010054
1808	2.42965	1506	560	Tmem135	Transmembrane protein 135	ENSMUSG00000039428
1809	2.42748	218	30	2210018M11Rik	Protein EMSY	ENSMUSG00000035401
1810	2.42742	201	23	Stard3	StAR-related lipid transfer protein 3 (START domain-containing protein 3)(StARD3)(Protein MLN 64)(Protein ES 64)	ENSMUSG00000018167
1811	2.42574	145	0	AC102862.7	ENSMUSG00000060559 protein Fragment	ENSMUSG00000060559
1812	2.42169	503	148	Tmem98	Transmembrane protein 98	ENSMUSG00000035413
1813	2.42136	716	236	Lifr	Leukemia inhibitory factor receptor Precursor (LIF receptor)(LIF-R)(D-factor/LIF receptor)(CD118 antigen)	ENSMUSG00000054263
1814	2.42105	222	32	Akt1	RAC-alpha serine/threonine-protein kinase (EC 2.7.11.1)(RAC-PK-alpha)(AKT1 kinase)(C-AKT)(Protein kinase B)(PKB)(Thymoma viral proto-oncogene)	ENSMUSG00000001729
1815	2.42056	159	6	Ero1l	ERO1-like protein alpha Precursor (ERO1-Lalpha)(ERO1-L)(EC 1.8.4.-)(Oxidoreductin-1-Lalpha)(Endoplasmic oxidoreductin-1-like protein)	ENSMUSG00000021831
1816	2.41892	258	47	Kcmf1	E3 ubiquitin-protein ligase KCMF1 (EC 6.3.2.-)(Differentially expressed in branching tubulogenesis 91)(Debt-91)	ENSMUSG00000055239
1817	2.41872	391	102	Zfp358	zinc finger protein 358	ENSMUSG00000047264
1818	2.4186	212	28	Lrch4	Leucine-rich repeat and calponin homology domain-containing protein 4	ENSMUSG00000029720
1819	2.41803	195	21	Lamb3	Laminin subunit beta-3 Precursor (Laminin 5 beta 3)(Kalinin B1 chain)	ENSMUSG00000026639
1820	2.41699	526	158	Ipo5	Importin-5 (Imp5)(Importin subunit beta-3)(Karyopherin beta-3)(Ran-binding protein 5)(RanBP5)	ENSMUSG00000030662
1821	2.41667	219	31	Rnft1	RING finger and transmembrane domain-containing protein 1	ENSMUSG00000020521
1822	2.41584	144	0	Cldn9	Claudin-9	ENSMUSG00000066720
1823	2.41584	144	0	Rpp25	Ribonuclease P protein subunit p25 (RNase P protein subunit p25)(EC 3.1.26.5)	ENSMUSG00000062309
1824	2.41579	818	279	Tmem85	Transmembrane protein 85	ENSMUSG00000027131
1825	2.41503	639	205	Afmid	Probable arylformamidase (EC 3.5.1.9)(Kynurenine formamidase)(KF)	ENSMUSG00000017718
1826	2.41481	226	34	Npas2	Neuronal PAS domain-containing protein 2 (Neuronal PAS2)	ENSMUSG00000026077
1827	2.41304	233	37	Kat2a	General control of amino acid synthesis protein 5-like 2 (EC 2.3.1.48)(Histone acetyltransferase GCN5)(mmGCN5)	ENSMUSG00000020918
1828	2.40972	247	43	Stard13	StAR-related lipid transfer protein 13 (START domain-containing protein 13)(StARD13)	ENSMUSG00000016128
1829	2.40952	153	4	Plcd1	1-phosphatidylinositol-4,5-bisphosphate phosphodiesterase delta-1 (EC 3.1.4.11)(Phosphoinositide phospholipase C)(Phospholipase C-delta-1)(PLC-delta-1)(PLC-III)	ENSMUSG00000010660
1830	2.40884	336	80	Tpd52	Tumor protein D52 (mD52)	ENSMUSG00000027506
1831	2.4065	492	145	Cyp2r1	Vitamin D 25-hydroxylase (EC 1.14.13.15)(Cytochrome P450 2R1)	ENSMUSG00000030670
1832	2.40342	3272	1302	Spcs2	Signal peptidase complex subunit 2 (EC 3.4.-.-)(Microsomal signal peptidase 25 kDa subunit)(SPase 25 kDa subunit)	ENSMUSG00000035227
1833	2.40136	253	46	Wdr34	WD repeat-containing protein 34	ENSMUSG00000039715
1834	2.40088	445	126	Syne1	synaptic nuclear envelope 1 isoform 1	ENSMUSG00000019769
1835	2.40086	457	131	Xaf1	XIAP-associated factor 1 (BIRC4-binding protein)	ENSMUSG00000040483
1836	2.4	152	4	Limch1	LIM and calponin homology domains-containing protein 1	ENSMUSG00000037736
1837	2.4	188	19	Ccdc88a	coiled coil domain containing 88A	ENSMUSG00000032740
1838	2.3985	219	32	Trim33	E3 ubiquitin-protein ligase TRIM33 (EC 6.3.2.-)(Tripartite motif-containing protein 33)(Transcription intermediary factor 1-gamma)(TIF1-gamma)(Ectodermin homolog)	ENSMUSG00000033014
1839	2.39735	624	201	Inpp5f	Phosphatidylinositide phosphatase SAC2 (EC 3.1.3.-)(Sac domain-containing inositol phosphatase 2)(Sac domain-containing phosphoinositide 5-phosphatase 2)(Inositol polyphosphate 5-phosphatase F)	ENSMUSG00000042105
1840	2.39706	552	171	Zfp191	Zinc finger protein 24 (Zinc finger protein 191)(Zfp-191)(Zinc finger protein ZF-12)	ENSMUSG00000051469
1841	2.39655	178	15	Slc35c1	GDP-fucose transporter 1 (Solute carrier family 35 member C1)	ENSMUSG00000049922
1842	2.39631	420	116	Tcf25	Transcription factor 25 (Nuclear localized protein 1)	ENSMUSG00000001472
1843	2.39614	1515	573	Sfrs11	splicing factor, arginine/serine-rich 11 isoform 2	ENSMUSG00000055436
1844	2.39604	142	0	Slc7a14	Probable cationic amino acid transporter (Solute carrier family 7 member 14)	ENSMUSG00000069072
1845	2.39604	142	0	Ankar	Ankyrin and armadillo repeat-containing protein	ENSMUSG00000039342
1846	2.39548	324	76	Epha1	Ephrin type-A receptor 1 Precursor (EC 2.7.10.1)(Tyrosine-protein kinase receptor ESK)	ENSMUSG00000029859
1847	2.39259	223	34	Smad3	Mothers against decapentaplegic homolog 3 (Mad3)(mMad3)(Mothers against DPP homolog 3)(SMAD 3)	ENSMUSG00000032402
1848	2.39095	481	142	Slc24a6	Sodium/potassium/calcium exchanger 6 Precursor (Na(+)/K(+)/Ca(2+)-exchange protein 6)(Solute carrier family 24 member 6)	ENSMUSG00000032754
1849	2.39053	304	68	Ercc8	DNA excision repair protein ERCC-8 (Cockayne syndrome WD repeat protein CSA homolog)	ENSMUSG00000021694
1850	2.38697	1146	421	Ankhd1	Eukaryotic translation initiation factor 4E-binding protein 3 (eIF4E-binding protein 3)(4E-BP3)	ENSMUSG00000024483
1851	2.38639	2179	854	Zbtb20	Zinc finger and BTB domain-containing protein 20 (Zinc finger protein 288)(BTB/POZ domain zinc finger factor HOF)	ENSMUSG00000022708
1852	2.38583	1718	661	Tspan12	Tetraspanin-12 (Tspan-12)(Transmembrane 4 superfamily member 12)	ENSMUSG00000029669
1853	2.38538	1107	405	Tmem82	Transmembrane protein 82	ENSMUSG00000043085
1854	2.38502	1269	473	Dcxr	L-xylulose reductase (XR)(EC 1.1.1.10)(Dicarbonyl/L-xylulose reductase)	ENSMUSG00000039450
1855	2.38346	217	32	Eif2s1	Eukaryotic translation initiation factor 2 subunit 1 (Eukaryotic translation initiation factor 2 subunit alpha)(eIF-2-alpha)(EIF-2alpha)(EIF-2A)	ENSMUSG00000021116
1856	2.38298	236	40	Dus4l	tRNA-dihydrouridine synthase 4-like (EC 1.-.-.-)	ENSMUSG00000020648
1857	2.38235	224	35	Rbm27	RNA-binding protein 27 (RNA-binding motif protein 27)(Peri-implantation stem cell protein 1)	ENSMUSG00000024491
1858	2.38095	150	4	Tmed8	Protein TMED8	ENSMUSG00000034111
1859	2.38016	2323	917	Rad23a	UV excision repair protein RAD23 homolog A (mHR23A)	ENSMUSG00000003813
1860	2.37981	395	107	Fam168a	UPF0541 protein FAM168A	ENSMUSG00000029461
1861	2.37963	157	7	Uap1l1	UDP-N-acetylhexosamine pyrophosphorylase-like protein 1 (EC 2.7.7.-)	ENSMUSG00000026956
1862	2.37945	502	152	Klhdc3	Kelch domain-containing protein 3 (Protein Peas)(Testis intracellular mediator protein)	ENSMUSG00000063576
1863	2.37918	540	168	Nt5dc1	5'-nucleotidase domain-containing protein 1 (5'-nucleotidase cytosolic II-like protein 1)	ENSMUSG00000039480
1864	2.379	421	118	Ankrd17	Ankyrin repeat domain-containing protein 17 (Gene trap ankyrin repeat protein)(Ankyrin repeat domain-containing protein FOE)	ENSMUSG00000055204
1865	2.37719	171	13	2810022L02Rik	SPATS2-like protein	ENSMUSG00000038305
1866	2.37624	140	0	Neurod1	Neurogenic differentiation factor 1 (NeuroD1)	ENSMUSG00000034701
1867	2.37609	715	242	Zmynd11	Zinc finger MYND domain-containing protein 11	ENSMUSG00000021156
1868	2.37552	3879	1574	Eef2	Elongation factor 2 (EF-2)	ENSMUSG00000034994
1869	2.37413	928	332	Igf2r	Cation-independent mannose-6-phosphate receptor Precursor (CI Man-6-P receptor)(CI-MPR)(M6PR)(Insulin-like growth factor 2 receptor)(Insulin-like growth factor II receptor)(IGF-II receptor)(M6P/IGF2 receptor)(M6P/IGF2R)(300 kDa mannose 6-phosphate receptor)(MPR 300)(CD222 antigen)	ENSMUSG00000023830
1870	2.37374	1310	493	Puf60	Poly(U)-binding-splicing factor PUF60 (60 kDa poly(U)-binding-splicing factor)	ENSMUSG00000002524
1871	2.37273	161	9	Tarsl2	Probable threonyl-tRNA synthetase 2, cytoplasmic (EC 6.1.1.3)(Threonine--tRNA ligase)(ThrRS)(Threonyl-tRNA synthetase-like protein 2)	ENSMUSG00000030515
1872	2.37165	519	160	Pop7	Ribonuclease P protein subunit p20 (RNaseP protein p20)(EC 3.1.26.5)	ENSMUSG00000029715
1873	2.36697	158	8	Atp2b4	plasma membrane calcium ATPase 4	ENSMUSG00000026463
1874	2.36634	139	0	Anks1b	Ankyrin repeat and sterile alpha motif domain-containing protein 1B (Amyloid-beta protein intracellular domain-associated protein 1)(AIDA-1)(E2A-PBX1-associated protein)(EB-1)	ENSMUSG00000058589
1875	2.36454	1087	401	Usp7	Ubiquitin carboxyl-terminal hydrolase 7 (EC 3.1.2.15)(Ubiquitin thioesterase 7)(Ubiquitin-specific-processing protease 7)(Deubiquitinating enzyme 7)(Herpesvirus-associated ubiquitin-specific protease)(mHAUSP)	ENSMUSG00000022710
1876	2.36432	2087	824	Aggf1	Angiogenic factor with G patch and FHA domains 1 (Angiogenic factor VG5Q)(mVG5Q)	ENSMUSG00000021681
1877	2.3619	148	4	Pcdh15	Protocadherin-15 Precursor	ENSMUSG00000052613
1878	2.36095	299	68	Slc37a3	Sugar phosphate exchanger 3 (Solute carrier family 37 member 3)	ENSMUSG00000029924
1879	2.36036	162	10	Lrig2	Leucine-rich repeats and immunoglobulin-like domains protein 2 Precursor	ENSMUSG00000032913
1880	2.35959	589	191	Nop56	Nucleolar protein 5A (Nucleolar protein Nop56)	ENSMUSG00000027405
1881	2.35897	176	16	Lrrc8e	Leucine-rich repeat-containing protein 8E	ENSMUSG00000046589
1882	2.35889	577	186	D6Wsu116e	Protein FAM21	ENSMUSG00000024104
1883	2.35882	301	69	Rffl	E3 ubiquitin-protein ligase rififylin (EC 6.3.2.-)(RING finger and FYVE-like domain-containing protein 1)(Fring)	ENSMUSG00000020696
1884	2.35769	513	159	Cryz	Quinone oxidoreductase (EC 1.6.5.5)(NADPH	ENSMUSG00000028199
1885	2.35714	395	109	Gosr2	Golgi SNAP receptor complex member 2 (27 kDa Golgi SNARE protein)(Membrin)	ENSMUSG00000020946
1886	2.35294	300	69	Gab1	GRB2-associated-binding protein 1 (Growth factor receptor bound protein 2-associated protein 1)(GRB2-associated binder 1)	ENSMUSG00000031714
1887	2.3522	274	58	Snx30	Sorting nexin-30	ENSMUSG00000028385
1888	2.35156	201	27	Tspo	Translocator protein (Peripheral-type benzodiazepine receptor)(PBR)(PKBS)(Mitochondrial benzodiazepine receptor)	ENSMUSG00000041736
1889	2.35135	683	232	Smu1	WD40 repeat-containing protein SMU1 (Smu-1 suppressor of mec-8 and unc-52 protein homolog)	ENSMUSG00000028409
1890	2.35122	382	104	5830457O10Rik	Protein DERPC	ENSMUSG00000046691
1891	2.35094	523	164	Pmpca	Mitochondrial-processing peptidase subunit alpha Precursor (EC 3.4.24.64)(Alpha-MPP)(P-55)	ENSMUSG00000026926
1892	2.3491	3823	1569	Rab2a	Ras-related protein Rab-2A	ENSMUSG00000047187
1893	2.34869	2500	1006	Mtfr1	Mitochondrial fission regulator 1	ENSMUSG00000027601
1894	2.34755	1001	368	S100a16	S100 calcium binding protein A16	ENSMUSG00000074457
1895	2.34739	1292	492	Actr3	Actin-related protein 3 (Actin-like protein 3)	ENSMUSG00000026341
1896	2.34697	7645	3199	Glud1	Glutamate dehydrogenase 1, mitochondrial Precursor (GDH)(EC 1.4.1.3)	ENSMUSG00000021794
1897	2.34677	191	23	Usp24	Ubiquitin carboxyl-terminal hydrolase 24 (EC 3.1.2.15)	ENSMUSG00000028514
1898	2.34368	957	350	Rbbp6	Retinoblastoma-binding protein 6 (p53-associated cellular protein of testis)(Proliferation potential-related protein)(Protein P2P-R)	ENSMUSG00000030779
1899	2.34299	1922	762	2010107E04Rik	6.8 kDa mitochondrial proteolipid	ENSMUSG00000021290
1900	2.34211	612	203	Itgb1bp1	Integrin beta-1-binding protein 1 (Bodenin)	ENSMUSG00000062352
1901	2.34167	181	19	Abi2	Abl interactor 2 (Abelson interactor 2)(Abi-2)	ENSMUSG00000026782
1902	2.3386	5522	2303	Ehhadh	Peroxisomal bifunctional enzyme (PBE)(PBFE)	ENSMUSG00000022853
1903	2.33645	150	6	Slc38a1	Sodium-coupled neutral amino acid transporter 1 (Amino acid transporter A1)(System A amino acid transporter 1)(System N amino acid transporter 1)(N-system amino acid transporter 2)(Solute carrier family 38 member 1)(MNat2)	ENSMUSG00000023169
1904	2.33582	213	33	Slk	STE20-like serine/threonine-protein kinase (STE20-like kinase)(mSLK)(EC 2.7.11.1)(STE20-related serine/threonine-protein kinase)(STE20-related kinase)(Serine/threonine-protein kinase 2)(STE20-related kinase SMAK)(Etk4)	ENSMUSG00000025060
1905	2.33577	220	36	Mll5	Histone-lysine N-methyltransferase MLL5 (EC 2.1.1.43)(Myeloid/lymphoid or mixed-lineage leukemia protein 5 homolog)	ENSMUSG00000029004
1906	2.33556	3394	1395	Bet1	BET1 homolog (mBET1)(Golgi vesicular membrane-trafficking protein p18)	ENSMUSG00000032757
1907	2.33548	262	54	Npat	Protein NPAT	ENSMUSG00000033054
1908	2.33333	166	13	Tsc22d2	TSC22 domain family, member 2	ENSMUSG00000027806
1909	2.33333	635	214	Srxn1	Sulfiredoxin-1 (EC 1.8.98.2)(Neoplastic progression protein 3)	ENSMUSG00000032802
1910	2.3314	301	71	Dnajc1	DnaJ homolog subfamily C member 1 (DnaJ protein homolog MTJ1)	ENSMUSG00000026740
1911	2.32975	24360	10398	Adh1	Alcohol dehydrogenase 1 (EC 1.1.1.1)(Alcohol dehydrogenase A subunit)(ADH-A2)	ENSMUSG00000074207
1912	2.32903	261	54	Prr3	Proline-rich protein 3 (MHC class I region proline-rich protein CAT56)	ENSMUSG00000038500
1913	2.32836	368	100	Maf1	Repressor of RNA polymerase III transcription MAF1 homolog	ENSMUSG00000022553
1914	2.32824	205	30	Slc4a1ap	solute carrier family 4 (anion exchanger), member 1, adaptor protein	ENSMUSG00000029141
1915	2.32735	1976	791	Ndufs7	NADH dehydrogenase	ENSMUSG00000020153
1916	2.32714	526	168	Zbtb7a	Zinc finger and BTB domain-containing protein 7A (Leukemia/lymphoma-related factor)(POZ and Krueppel erythroid myeloid ontogenic factor)(POK erythroid myeloid ontogenic factor)(Pokemon)	ENSMUSG00000035011
1917	2.32456	165	13	Med10	Mediator of RNA polymerase II transcription subunit 10 (Mediator complex subunit 10)	ENSMUSG00000021598
1918	2.32353	137	1	Chmp4c	Charged multivesicular body protein 4c (Chromatin-modifying protein 4c)(CHMP4c)	ENSMUSG00000027536
1919	2.32353	137	1	Gdf9	Growth/differentiation factor 9 Precursor (GDF-9)	ENSMUSG00000018238
1920	2.3211	153	8	Rnaseh1	Ribonuclease H1 (RNase H1)(EC 3.1.26.4)	ENSMUSG00000020630
1921	2.32107	594	198	Suds3	Sin3 histone deacetylase corepressor complex component SDS3 (Suppressor of defective silencing 3 protein homolog)	ENSMUSG00000066900
1922	2.3191	823	297	E430025E21Rik	Strumpellin	ENSMUSG00000022350
1923	2.31847	264	56	Gpn3	GPN-loop GTPase 3 (ATP-binding domain 1 family member C)	ENSMUSG00000029464
1924	2.31731	141	3	Hdgfrp3	Hepatoma-derived growth factor-related protein 3 (HRP-3)	ENSMUSG00000025104
1925	2.31613	259	54	Phf10	PHD finger protein 10	ENSMUSG00000023883
1926	2.31579	164	13	Polr3d	DNA-directed RNA polymerase III subunit RPC4 (RNA polymerase III subunit C4)(DNA-directed RNA polymerase III subunit D)	ENSMUSG00000000776
1927	2.31351	2623	1076	Mocs2	Molybdenum cofactor synthesis protein 2 large subunit (Molybdopterin synthase large subunit)(MPT synthase large subunit)(MOCS2B)	ENSMUSG00000015536
1928	2.31197	982	367	Rnaseh2b	Ribonuclease H2 subunit B (RNase H2 subunit B)(Ribonuclease HI subunit B)(Deleted in lymphocytic leukemia 8 homolog)	ENSMUSG00000021932
1929	2.31169	256	53	Rg9mtd3	RNA (guanine-9-)-methyltransferase domain-containing protein 3 (EC 2.1.1.-)	ENSMUSG00000035601
1930	2.31152	1525	602	Sdf2l1	Stromal cell-derived factor 2-like protein 1 Precursor (SDF2-like protein 1)	ENSMUSG00000022769
1931	2.31138	286	66	2610207I05Rik	Serine/threonine-protein kinase SMG1 (SMG-1)(EC 2.7.11.1)	ENSMUSG00000030655
1932	2.30973	161	12	Mbc2	Extended synaptotagmin-1 (E-Syt1)(Membrane-bound C2 domain-containing protein)(Protein FAM62A)	ENSMUSG00000025366
1933	2.308	2755	1136	Ndufs8	NADH dehydrogenase	ENSMUSG00000059734
1934	2.30702	163	13	St8sia4	CMP-N-acetylneuraminate-poly-alpha-2,8-sialyltransferase (EC 2.4.99.-)(Alpha-2,8-sialyltransferase 8D)(ST8Sia IV)(Polysialyltransferase-1)	ENSMUSG00000040710
1935	2.30392	135	1	Cbx4	E3 SUMO-protein ligase CBX4 (Chromobox protein homolog 4)(Polycomb 2 homolog)(Pc2)(mPc2)	ENSMUSG00000039989
1936	2.29851	362	100	Pip5k1a	Phosphatidylinositol-4-phosphate 5-kinase type-1 alpha (EC 2.7.1.68)(Phosphatidylinositol-4-phosphate 5-kinase type I alpha)(PtdIns(4)P-5-kinase alpha)(PIP5KIalpha)(Phosphatidylinositol-4-phosphate 5-kinase type I beta)(PI4P5KIbeta)(68 kDa type I phosphatidylinositol-4-phosphate 5-kinase)	ENSMUSG00000028126
1937	2.29828	2042	831	Polr2f	DNA-directed RNA polymerases I, II, and III subunit RPABC2 (RNA polymerases I, II, and III subunit ABC2)(DNA-directed RNA polymerase II subunit F)(RPB6)	ENSMUSG00000033020
1938	2.29741	433	131	Mrpl9	39S ribosomal protein L9, mitochondrial Precursor (L9mt)(MRP-L9)	ENSMUSG00000028140
1939	2.29594	1087	416	Pigp	Phosphatidylinositol N-acetylglucosaminyltransferase subunit P (EC 2.4.1.198)(Phosphatidylinositol-glycan biosynthesis class P protein)(PIG-P)(Down syndrome critical region protein 5 homolog)	ENSMUSG00000022940
1940	2.29496	219	38	Mll1	Histone-lysine N-methyltransferase HRX (EC 2.1.1.43)(Zinc finger protein HRX)(ALL-1)	ENSMUSG00000002028
1941	2.29402	1320	518	H2afv	Histone H2A.V (H2A.F/Z)	ENSMUSG00000041126
1942	2.29358	150	8	Ccdc57	Coiled-coil domain-containing protein 57	ENSMUSG00000048445
1943	2.29126	136	2	Prkar2b	cAMP-dependent protein kinase type II-beta regulatory subunit	ENSMUSG00000002997
1944	2.29114	262	57	Ccdc90a	Coiled-coil domain-containing protein 90A, mitochondrial Precursor	ENSMUSG00000021371
1945	2.28814	575	194	Fam149a	Protein FAM149A	ENSMUSG00000070044
1946	2.28713	131	0	Ttc12	Tetratricopeptide repeat protein 12 (TPR repeat protein 12)	ENSMUSG00000040219
1947	2.28713	131	0	Mnat1	CDK-activating kinase assembly factor MAT1 (RING finger protein MAT1)(Menage a trois)(CDK7/cyclin H assembly factor)(p36)(p35)	ENSMUSG00000021103
1948	2.28659	11413	4934	Echs1	Enoyl-CoA hydratase, mitochondrial Precursor (EC 4.2.1.17)(Short chain enoyl-CoA hydratase)(SCEH)(Enoyl-CoA hydratase 1)	ENSMUSG00000025465
1949	2.28571	332	88	Dpp4	Dipeptidyl peptidase 4 (EC 3.4.14.5)(Dipeptidyl peptidase IV)(DPP IV)(T-cell activation antigen CD26)(Thymocyte-activating molecule)(THAM)(CD26 antigen)	ENSMUSG00000035000
1950	2.28481	261	57	Ralgps2	Ras-specific guanine nucleotide-releasing factor RalGPS2 (RalA exchange factor RalGPS2)(Ral GEF with PH domain and SH3-binding motif 2)	ENSMUSG00000026594
1951	2.28358	206	33	Srd5a1	3-oxo-5-alpha-steroid 4-dehydrogenase 1 (EC 1.3.99.5)(Steroid 5-alpha-reductase 1)(SR type 1)	ENSMUSG00000021594
1952	2.28346	190	26	Plrg1	Pleiotropic regulator 1	ENSMUSG00000027998
1953	2.28205	167	16	Usp6nl	USP6 N-terminal-like protein	ENSMUSG00000039046
1954	2.28164	2298	950	Sec24c	Sec24 related gene family, member C	ENSMUSG00000039367
1955	2.28139	427	130	Nans	N-acetylneuraminic acid synthase	ENSMUSG00000028334
1956	2.27778	187	25	Fam49b	Protein FAM49B	ENSMUSG00000022378
1957	2.27747	729	263	Pklr	Pyruvate kinase isozymes R/L (EC 2.7.1.40)(L-PK)	ENSMUSG00000041237
1958	2.27734	483	155	Nr2f2	COUP transcription factor 2 (COUP-TF II)(COUP-TF2)(Nuclear receptor subfamily 2 group F member 2)(Apolipoprotein AI regulatory protein 1)(ARP-1)	ENSMUSG00000030551
1959	2.27723	130	0	Rbm44	RNA-binding protein 44 (RNA-binding motif protein 44)	ENSMUSG00000070732
1960	2.27723	130	0	EG212225	Sperm motility kinase W (EC 2.7.-.-)	ENSMUSG00000044457
1961	2.27632	246	51	Sdf4	45 kDa calcium-binding protein Precursor (Cab45)(Stromal cell-derived factor 4)(SDF-4)	ENSMUSG00000029076
1962	2.27619	139	4	Miox	Inositol oxygenase (EC 1.13.99.1)(Myo-inositol oxygenase)(MI oxygenase)(Aldehyde reductase-like 6)(Renal-specific oxidoreductase)	ENSMUSG00000022613
1963	2.2739	2017	830	Ivd	Isovaleryl-CoA dehydrogenase, mitochondrial Precursor (IVD)(EC 1.3.99.10)	ENSMUSG00000027332
1964	2.27344	191	27	Ift80	Intraflagellar transport protein 80 homolog (WD repeat-containing protein 56)	ENSMUSG00000027778
1965	2.27273	200	31	Wdr77	Methylosome protein 50 (MEP-50)(WD repeat-containing protein 77)	ENSMUSG00000000561
1966	2.27184	134	2	Csnk2a2	Casein kinase II subunit alpha' (CK II)(EC 2.7.11.1)	ENSMUSG00000046707
1967	2.27049	177	21	Exoc7	Exocyst complex component 7 (Exocyst complex component Exo70)	ENSMUSG00000020792
1968	2.27002	2565	1073	Cald1	caldesmon 1	ENSMUSG00000029761
1969	2.26239	676	242	Mphosph10	U3 small nucleolar ribonucleoprotein protein MPP10 (M phase phosphoprotein 10)	ENSMUSG00000030521
1970	2.26235	633	223	Nrbf2	Nuclear receptor-binding factor 2 (NRBF-2)	ENSMUSG00000075000
1971	2.2619	185	25	Slc2a5	Solute carrier family 2, facilitated glucose transporter member 5 (Glucose transporter type 5, small intestine)(GLUT-5)(Fructose transporter)	ENSMUSG00000028976
1972	2.26073	585	202	Nudt22	Nucleoside diphosphate-linked moiety X motif 22 (Nudix motif 22)	ENSMUSG00000037349
1973	2.26027	230	45	Invs	Inversin (Inversion of embryo turning protein)(Nephrocystin-2)	ENSMUSG00000028344
1974	2.26027	230	45	Plcb3	1-phosphatidylinositol-4,5-bisphosphate phosphodiesterase beta-3 (EC 3.1.4.11)(Phosphoinositide phospholipase C)(Phospholipase C-beta-3)(PLC-beta-3)	ENSMUSG00000024960
1975	2.2585	232	46	Pycrl	Pyrroline-5-carboxylate reductase 3 (P5C reductase 3)(P5CR 3)(EC 1.5.1.2)(Pyrroline-5-carboxylate reductase-like protein)	ENSMUSG00000022571
1976	2.25688	146	8	Gtf3c1	General transcription factor 3C polypeptide 1 (Transcription factor IIIC subunit alpha)(TF3C-alpha)(TFIIIC 220 kDa subunit)(TFIIIC220)(TFIIIC box B-binding subunit)	ENSMUSG00000032777
1977	2.25658	243	51	Hck	Tyrosine-protein kinase HCK (EC 2.7.10.2)(Hemopoietic cell kinase)(p56-HCK/p59-HCK)(B-cell/myeloid kinase)(BMK)	ENSMUSG00000003283
1978	2.25652	419	129	Cit	Citron Rho-interacting kinase (CRIK)(EC 2.7.11.1)(Rho-interacting, serine/threonine-protein kinase 21)	ENSMUSG00000029516
1979	2.2562	1265	504	Bxdc1	Brix domain-containing protein 1	ENSMUSG00000038510
1980	2.25466	263	60	Abca5	ATP-binding cassette sub-family A member 5	ENSMUSG00000018800
1981	2.25389	1205	478	Rab4b	Ras-related protein Rab-4B	ENSMUSG00000053291
1982	2.2517	231	46	Comtd1	Catechol-O-methyltransferase domain-containing protein 1 (EC 2.1.1.-)	ENSMUSG00000021773
1983	2.24927	667	240	Glyctk	Glycerate kinase (EC 2.7.1.31)	ENSMUSG00000020258
1984	2.24891	415	128	Ankrd57	Ankyrin repeat domain-containing protein 57	ENSMUSG00000071286
1985	2.24806	190	28	Pofut1	GDP-fucose protein O-fucosyltransferase 1 Precursor (EC 2.4.1.221)(Peptide-O-fucosyltransferase 1)(O-FucT-1)	ENSMUSG00000046020
1986	2.24779	154	12	Zdhhc24	Probable palmitoyltransferase ZDHHC24 (EC 2.3.1.-)(Zinc finger DHHC domain-containing protein 24)(DHHC-24)	ENSMUSG00000006463
1987	2.24627	201	33	Pigb	GPI mannosyltransferase 3 (EC 2.4.1.-)(GPI mannosyltransferase III)(GPI-MT-III)(Phosphatidylinositol-glycan biosynthesis class B protein)(PIG-B)	ENSMUSG00000079469
1988	2.24567	1198	477	Add3	Gamma-adducin (Adducin-like protein 70)	ENSMUSG00000025026
1989	2.24521	486	160	Phf20l1	Tudor domain-containing protein PHF20L1	ENSMUSG00000072501
1990	2.2451	129	1	Rab39b	Ras-related protein Rab-39B	ENSMUSG00000031202
1991	2.24401	4489	1944	Tuba4a	Tubulin alpha-4A chain (Tubulin alpha-4 chain)(Alpha-tubulin 4)(Alpha-tubulin isotype M-alpha-4)	ENSMUSG00000026202
1992	2.2437	167	18	Mtx2	Metaxin-2	ENSMUSG00000027099
1993	2.24352	333	92	Plekhj1	Pleckstrin homology domain-containing family J member 1 (Guanine nucleotide-releasing protein x)	ENSMUSG00000035278
1994	2.24272	131	2	Papln	Papilin Precursor	ENSMUSG00000021223
1995	2.24167	169	19	Zbtb1	Zinc finger and BTB domain-containing protein 1	ENSMUSG00000033454
1996	2.24107	151	11	Mr1	Major histocompatibility complex class I-related gene protein Precursor (MHC class-I related-gene protein)(Class I histocompatibility antigen-like protein)	ENSMUSG00000026471
1997	2.24058	673	244	Dnaja2	DnaJ homolog subfamily A member 2 (mDj3)	ENSMUSG00000031701
1998	2.23718	249	55	Ctnnbl1	Beta-catenin-like protein 1 (Nuclear-associated protein)(NAP)	ENSMUSG00000027649
1999	2.23585	137	5	Npr3	Atrial natriuretic peptide clearance receptor Precursor (Atrial natriuretic peptide C-type receptor)(ANPRC)(ANP-C)(NPR-C)(EF-2)	ENSMUSG00000022206
[truncated: 17,869 more rows]
