# Supplementary material for: RNA Sequencing Reveals Differential Expression of Mitochondrial and Oxidation Reduction Genes in the Long-Lived Naked Mole-Rat When Compared to Mice
Source: PLoS One. 2011 Nov 3;6(11):e26729. doi: 10.1371/journal.pone.0026729 (PMC3207814; doi:10.1371/journal.pone.0026729)
Supplement: Dataset S2 — Full results for genes in GenAge database. (http://genomics.senescence.info/genes/human.html). (XLS) [file pone.0026729.s002.xls]

## Sheet: Genage genes
Rank	Fold difference	NMR count	Mouse count	Gene symbol	Gene description	Ensembl ID
9	143.881	202485	1307	A2m	Alpha-2-macroglobulin-P Precursor (Alpha-2-macroglobulin)	ENSMUSG00000030111
56	35.411	5070	45	Sdhc	Succinate dehydrogenase cytochrome b560 subunit, mitochondrial Precursor (Integral membrane protein CII-3)(QPs-1)(QPs1)	ENSMUSG00000058076
70	27.1275	2667	1	Igf2	Insulin-like growth factor II Precursor (Multiplication-stimulating polypeptide)(IGF-II)	ENSMUSG00000048583
134	16.3496	1911	22	Foxo4	Forkhead box protein O4 (Fork head domain transcription factor AFX1)(Afxh)	ENSMUSG00000042903
153	15.0261	28134	1778	Prdx1	Peroxiredoxin-1 (EC 1.11.1.15)(Thioredoxin peroxidase 2)(Thioredoxin-dependent peroxide reductase 2)(Osteoblast-specific factor 3)(OSF-3)(Macrophage 23 kDa stress protein)	ENSMUSG00000028691
209	11.8706	5954	409	Igfbp3	Insulin-like growth factor-binding protein 3 Precursor (IGF-binding protein 3)(IGFBP-3)(IBP-3)	ENSMUSG00000020427
215	11.5822	8772	665	Ywhaz	14-3-3 protein zeta/delta (Protein kinase C inhibitor protein 1)(KCIP-1)(SEZ-2)	ENSMUSG00000022285
311	8.81651	861	8	Lrp2	Low-density lipoprotein receptor-related protein 2 Precursor (Megalin)(Glycoprotein 330)(gp330)	ENSMUSG00000027070
351	8.01923	734	3	Lep	Leptin Precursor (Obesity factor)	ENSMUSG00000059201
435	6.78505	626	6	Ercc1	DNA excision repair protein ERCC-1	ENSMUSG00000003549
445	6.68391	1063	73	Insr	Insulin receptor Precursor (IR)(EC 2.7.10.1)(CD220 antigen)	ENSMUSG00000005534
456	6.53008	67519	10254	Apoc3	Apolipoprotein C-III Precursor (Apo-CIII)(ApoC-III)	ENSMUSG00000032081
462	6.4717	1615	164	Ube2i	SUMO-conjugating enzyme UBC9 (EC 6.3.2.-)(SUMO-protein ligase)(Ubiquitin-conjugating enzyme E2 I)(Ubiquitin-protein ligase I)(Ubiquitin carrier protein I)(Ubiquitin carrier protein 9)(mUBC9)	ENSMUSG00000015120
515	5.97479	611	18	Ddit3	DNA damage-inducible transcript 3 (DDIT-3)(Growth arrest and DNA-damage-inducible protein GADD153)(C/EBP-homologous protein)(CHOP)	ENSMUSG00000025408
551	5.74675	785	53	Ptk2	Focal adhesion kinase 1 (FADK 1)(EC 2.7.10.2)(pp125FAK)	ENSMUSG00000022607
616	5.27723	433	0	Mxi1	MAX-interacting protein 1 (Protein MXI1)	ENSMUSG00000025025
715	4.72006	14839	3064	Cat	Catalase (EC 1.11.1.6)	ENSMUSG00000027187
768	4.45038	483	30	Xrcc6	ATP-dependent DNA helicase 2 subunit 1 (ATP-dependent DNA helicase II 70 kDa subunit)(Ku autoantigen protein p70 homolog)(Ku70)(CTC box-binding factor 75 kDa subunit)(CTCBF)(CTC75)(DNA repair protein XRCC6)	ENSMUSG00000022471
791	4.36842	398	13	Erbb2	Receptor tyrosine-protein kinase erbB-2 Precursor (EC 2.7.10.1)(p185erbB2)(C-erbB-2)(NEU proto-oncogene)(CD340 antigen)	ENSMUSG00000062312
851	4.16374	612	70	Mapk9	Mitogen-activated protein kinase 9 (EC 2.7.11.24)(Stress-activated protein kinase JNK2)(c-Jun N-terminal kinase 2)	ENSMUSG00000020366
943	3.83775	1059	201	Ep300	E1A binding protein p300	ENSMUSG00000055024
949	3.82051	794	133	Pik3r1	Phosphatidylinositol 3-kinase regulatory subunit alpha (PI3-kinase p85 subunit alpha)(PtdIns-3-kinase p85-alpha)(PI3K)	ENSMUSG00000041417
960	3.7931	340	15	Prkca	Protein kinase C alpha type (PKC-alpha)(PKC-A)(EC 2.7.11.13)	ENSMUSG00000050965
1027	3.58871	790	147	App	Amyloid beta A4 protein Precursor (Alzheimer disease amyloid A4 protein homolog)(ABPP)(APP)(Amyloidogenic glycoprotein)(AG)	ENSMUSG00000022892
1061	3.50847	314	17	Lepr	Leptin receptor Precursor (LEP-R)(OB receptor)(OB-R)(B219)(CD295 antigen)	ENSMUSG00000057722
1082	3.46468	832	168	Ercc5	DNA repair protein complementing XP-G cells homolog (Xeroderma pigmentosum group G-complementing protein homolog)(DNA excision repair protein ERCC-5)	ENSMUSG00000026048
1285	3.09938	898	221	Emd	Emerin	ENSMUSG00000001964
1329	3.02941	209	1	Crebbp	CREB-binding protein (EC 2.3.1.48)	ENSMUSG00000022521
1330	3.02875	1375	386	Bscl2	Seipin (Bernardinelli-Seip congenital lipodystrophy type 2 protein homolog)	ENSMUSG00000071657
1348	2.99148	953	251	Grb2	Growth factor receptor-bound protein 2 (Adapter protein GRB2)(SH2/SH3 adapter GRB2)	ENSMUSG00000059923
1357	2.96802	921	243	Pten	Phosphatidylinositol-3,4,5-trisphosphate 3-phosphatase PTEN (EC 3.1.3.67)(Mutated in multiple advanced cancers 1)	ENSMUSG00000013663
1457	2.82736	768	206	Gsk3b	Glycogen synthase kinase-3 beta (GSK-3 beta)(EC 2.7.11.26)	ENSMUSG00000022812
1460	2.82676	1548	482	Gsr	Glutathione reductase, mitochondrial Precursor (GRase)(GR)(EC 1.8.1.7)	ENSMUSG00000031584
1570	2.68519	190	7	Creb1	cAMP response element-binding protein (CREB)	ENSMUSG00000025958
1571	2.68354	324	57	Terf1	Telomeric repeat-binding factor 1 (TTAGGG repeat-binding factor 1)	ENSMUSG00000025925
1625	2.62439	976	309	Jund	Transcription factor jun-D	ENSMUSG00000071076
1657	2.59137	921	293	Ncor1	Nuclear receptor corepressor 1 (N-CoR1)(N-CoR)(Retinoid X receptor-interacting protein 13)(RIP13)	ENSMUSG00000018501
1721	2.52116	853	277	Sumo1	Small ubiquitin-related modifier 1 Precursor (SUMO-1)(Ubiquitin-like protein SMT3C)(SMT3 homolog 3)(Ubiquitin-homology domain protein PIC1)	ENSMUSG00000026021
1754	2.48503	315	66	Psen1	Presenilin-1 (PS-1)(EC 3.4.23.-)(Protein S182)	ENSMUSG00000019969
1800	2.44365	2285	875	Cebpa	CCAAT/enhancer-binding protein alpha (C/EBP alpha)	ENSMUSG00000034957
1814	2.42105	222	32	Akt1	RAC-alpha serine/threonine-protein kinase (EC 2.7.11.1)(RAC-PK-alpha)(AKT1 kinase)(C-AKT)(Protein kinase B)(PKB)(Thymoma viral proto-oncogene)	ENSMUSG00000001729
1849	2.39053	304	68	Ercc8	DNA excision repair protein ERCC-8 (Cockayne syndrome WD repeat protein CSA homolog)	ENSMUSG00000021694
1868	2.37552	3879	1574	Eef2	Elongation factor 2 (EF-2)	ENSMUSG00000034994
2019	2.21786	521	179	Ubb	Ubiquitin	ENSMUSG00000019505
2064	2.18354	245	57	Rfc4	Replication factor C subunit 4 (Activator 1 subunit 4)	ENSMUSG00000022881
2074	2.17772	13269	6038	Hspd1	60 kDa heat shock protein, mitochondrial Precursor (Heat shock protein 60)(HSP-60)(Hsp60)(60 kDa chaperonin)(Chaperonin 60)(CPN60)(Mitochondrial matrix protein P1)(HSP-65)	ENSMUSG00000025980
2100	2.16234	233	53	Chek2	Serine/threonine-protein kinase Chk2 (EC 2.7.11.1)	ENSMUSG00000029521
2198	2.07437	4586	2158	Ctnnb1	Catenin beta-1 (Beta-catenin)	ENSMUSG00000006932
2218	2.05923	491	186	Gtf2h2	General transcription factor IIH subunit 2 (General transcription factor IIH polypeptide 2)(TFIIH basal transcription factor complex p44 subunit)(Basic transcription factor 2 44 kDa subunit)(BTF2-p44)	ENSMUSG00000021639
2226	2.05556	159	25	Kl	Klotho Precursor (EC 3.2.1.31)	ENSMUSG00000058488
2239	2.04698	205	48	Atr	Serine/threonine-protein kinase ATR (EC 2.7.11.1)(Ataxia telangiectasia and Rad3-related protein)	ENSMUSG00000032409
2291	2.01105	264	80	Pik3cb	Phosphatidylinositol-4,5-bisphosphate 3-kinase catalytic subunit beta isoform (EC 2.7.1.153)(PI3-kinase p110 subunit beta)(PtdIns-3-kinase p110)(PI3Kbeta)(PI3K)	ENSMUSG00000032462
2384	1.95964	337	122	Flt1	Vascular endothelial growth factor receptor 1 Precursor (VEGFR-1)(EC 2.7.10.1)(Tyrosine-protein kinase receptor FLT)(FLT-1)(Embryonic receptor kinase 2)	ENSMUSG00000029648
2387	1.95855	278	92	Abl1	Proto-oncogene tyrosine-protein kinase ABL1 (EC 2.7.10.2)(Abelson murine leukemia viral oncogene homolog 1)(c-ABL)(p150)	ENSMUSG00000026842
2390	1.95509	553	233	Zmpste24	CAAX prenyl protease 1 homolog (EC 3.4.24.84)(Prenyl protein-specific endoprotease 1)(Farnesylated proteins-converting enzyme 1)(FACE-1)(Zinc metalloproteinase Ste24 homolog)	ENSMUSG00000043207
2437	1.9322	128	17	Sirt6	Mono-ADP-ribosyltransferase sirtuin-6 (EC 2.4.2.31)(SIR2-like protein 6)	ENSMUSG00000034748
2484	1.90925	973	461	Rae1	mRNA export factor (mRNA-associated protein mrnp 41)(Rae1 protein homolog)	ENSMUSG00000027509
2515	1.89286	112	11	Ercc6	excision repair cross-complementing rodent repair deficiency, complementation group 6	ENSMUSG00000054051
2615	1.84409	4927	2625	Ghr	Growth hormone receptor Precursor (GH receptor)(Somatotropin receptor)	ENSMUSG00000055737
2624	1.83854	253	91	Rpa1	Replication protein A 70 kDa DNA-binding subunit (RP-A p70)(Replication factor A protein 1)(RF-A protein 1)	ENSMUSG00000000751
2628	1.83721	295	114	Polb	DNA polymerase beta (EC 2.7.7.7)(EC 4.2.99.-)	ENSMUSG00000031536
2676	1.80952	660	319	Stat3	Signal transducer and activator of transcription 3 (Acute-phase response factor)	ENSMUSG00000004040
2680	1.80645	180	54	Xrcc5	ATP-dependent DNA helicase 2 subunit 2 (EC 3.6.1.-)(ATP-dependent DNA helicase II 80 kDa subunit)(Ku autoantigen protein p86 homolog)(Ku80)(CTC box-binding factor 85 kDa subunit)(CTCBF)(CTC85)(Nuclear factor IV)(DNA repair protein XRCC5)	ENSMUSG00000026187
2726	1.78519	382	169	Ptpn11	Tyrosine-protein phosphatase non-receptor type 11 (EC 3.1.3.48)(Protein-tyrosine phosphatase SYP)(SH-PTP2)(SHP-2)(Shp2)	ENSMUSG00000043733
2812	1.74351	437	207	Irs1	Insulin receptor substrate 1 (IRS-1)	ENSMUSG00000055980
2867	1.7101	57604	33642	mt-Co1	Cytochrome c oxidase subunit 1 (EC 1.9.3.1)(Cytochrome c oxidase polypeptide I)	ENSMUSG00000064351
2888	1.6992	2459	1405	Hspa9	Stress-70 protein, mitochondrial Precursor (75 kDa glucose-regulated protein)(GRP 75)(Heat shock 70 kDa protein 9)(Peptide-binding protein 74)(PBP74)(P66 MOT)(Mortalin)	ENSMUSG00000024359
2919	1.6874	71319	42224	Sod1	Superoxide dismutase	ENSMUSG00000022982
2927	1.68383	4576	2676	Cdc42	Cell division control protein 42 homolog Precursor (G25K GTP-binding protein)	ENSMUSG00000006699
2943	1.67593	81	7	Ngfr	Tumor necrosis factor receptor superfamily member 16 Precursor (Low-affinity nerve growth factor receptor)(NGF receptor)(Low affinity neurotrophin receptor p75NTR)(CD271 antigen)	ENSMUSG00000000120
2967	1.66667	70	1	Prkdc	DNA-dependent protein kinase catalytic subunit (DNA-PK catalytic subunit)(DNA-PKcs)(EC 2.7.11.1)(P460)	ENSMUSG00000022672
3041	1.63566	111	28	Ppara	Peroxisome proliferator-activated receptor alpha (PPAR-alpha)(Nuclear receptor subfamily 1 group C member 1)	ENSMUSG00000022383
3142	1.59302	311	157	Csnk1e	Casein kinase I isoform epsilon (CKI-epsilon)(CKIe)(EC 2.7.11.1)	ENSMUSG00000022433
3244	1.54455	56	0	Nrg1	neuregulin 1	ENSMUSG00000062991
3286	1.53378	127	47	Arhgap1	Rho GTPase-activating protein 1 (Rho-type GTPase-activating protein 1)	ENSMUSG00000027247
3314	1.52448	118	42	Max	Protein max (Myc-associated factor X)(Protein myn)(Myc-binding novel HLH/LZ protein)	ENSMUSG00000059436
3400	1.49533	60	6	Ctgf	Connective tissue growth factor Precursor (Protein FISP-12)(Hypertrophic chondrocyte-specific protein 24)	ENSMUSG00000019997
3473	1.47277	576	358	Vcp	Transitional endoplasmic reticulum ATPase (TER ATPase)(15S Mg(2+)-ATPase p97 subunit)(Valosin-containing protein)(VCP)	ENSMUSG00000028452
3490	1.46853	110	42	Atf2	Cyclic AMP-dependent transcription factor ATF-2 (Activating transcription factor 2)(cAMP response element-binding protein CRE-BP1)(MXBP protein)	ENSMUSG00000027104
3532	1.45283	54	5	Ppargc1a	Peroxisome proliferator-activated receptor gamma coactivator 1-alpha (PPAR-gamma coactivator 1-alpha)(PPARGC-1-alpha)(PGC-1-alpha)	ENSMUSG00000029167
3607	1.43034	362	222	Top3b	DNA topoisomerase 3-beta-1 (EC 5.99.1.2)(DNA topoisomerase III beta-1)	ENSMUSG00000022779
3721	1.39073	110	50	Pdpk1	3-phosphoinositide-dependent protein kinase 1 (mPDK1)(EC 2.7.11.1)	ENSMUSG00000024122
3729	1.38614	40	0	Atm	Serine-protein kinase ATM (EC 2.7.11.1)(Ataxia telangiectasia mutated homolog)(A-T, mutated homolog)	ENSMUSG00000034218
3748	1.38095	45	4	Dbn1	Drebrin (Developmentally-regulated brain protein)	ENSMUSG00000034675
3818	1.3629	69	23	Jak2	Tyrosine-protein kinase JAK2 (EC 2.7.10.2)(Janus kinase 2)(JAK-2)	ENSMUSG00000024789
3859	1.35124	554	383	Hbp1	HMG box-containing protein 1 (HMG box transcription factor 1)(High mobility group box transcription factor 1)	ENSMUSG00000002996
3861	1.35075	81	33	Foxo3	forkhead box O3	ENSMUSG00000048756
4007	1.31373	34	1	Mxd1	MAD protein (MAX dimerizer)(MAX dimerization protein 1)	ENSMUSG00000001156
4027	1.30693	32	0	Tert	Telomerase reverse transcriptase (EC 2.7.7.49)(Telomerase catalytic subunit)	ENSMUSG00000021611
4085	1.29114	104	57	Tbp	TATA-box-binding protein (TATA-box factor)(TATA-binding factor)(TATA sequence-binding protein)(Transcription initiation factor TFIID TBP subunit)	ENSMUSG00000014767
4217	1.26	215	149	Xpa	DNA repair protein complementing XP-A cells homolog (Xeroderma pigmentosum group A-complementing protein homolog)	ENSMUSG00000028329
4264	1.25	30	3	Hmgb2	High mobility group protein B2 (High mobility group protein 2)(HMG-2)	ENSMUSG00000054717
4348	1.23214	866	683	Nr3c1	Glucocorticoid receptor (GR)(Nuclear receptor subfamily 3 group C member 1)	ENSMUSG00000024431
4403	1.21965	111	72	Foxo1	Forkhead box protein O1 (Forkhead box protein O1A)(Forkhead in rhabdomyosarcoma)	ENSMUSG00000044167
4480	1.20192	25	3	Pdgfb	Platelet-derived growth factor subunit B Precursor (PDGF subunit B)(Platelet-derived growth factor B chain)(Platelet-derived growth factor beta polypeptide)(PDGF-2)(c-sis)	ENSMUSG00000000489
4737	1.15909	257	207	Hdac3	Histone deacetylase 3 (HD3)(EC 3.5.1.98)	ENSMUSG00000024454
4752	1.15811	464	386	Bub3	Mitotic checkpoint protein BUB3 (WD repeat type I transmembrane protein A72.5)	ENSMUSG00000066979
4777	1.15528	86	60	Stk11	Serine/threonine-protein kinase 11 (EC 2.7.11.1)(Serine/threonine-protein kinase LKB1)	ENSMUSG00000003068
4795	1.15217	59	37	Ptk2b	Protein tyrosine kinase 2 beta (EC 2.7.10.2)(Focal adhesion kinase 2)(FADK 2)(Proline-rich tyrosine kinase 2)(Cell adhesion kinase beta)(CAK beta)(Calcium-dependent tyrosine kinase)(CADTK)(Related adhesion focal tyrosine kinase)(RAFTK)	ENSMUSG00000059456
4823	1.14851	16	0	Pappa	Pappalysin-1 Precursor (EC 3.4.24.79)(Pregnancy-associated plasma protein A)(PAPP-A)(Insulin-like growth factor-dependent IGF-binding protein 4 protease)(IGF-dependent IGFBP-4 protease)(IGFBP-4ase)	ENSMUSG00000028370
4930	1.13291	79	57	Med1	Mediator of RNA polymerase II transcription subunit 1 (Mediator complex subunit 1)(Peroxisome proliferator-activated receptor-binding protein)(PPAR-binding protein)(PBP)(Thyroid hormone receptor-associated protein complex 220 kDa component)(Trap220)(Thyroid receptor-interacting protein 2)(TRIP-2)	ENSMUSG00000018160
4977	1.12583	70	50	Mapk8	Mitogen-activated protein kinase 8 (EC 2.7.11.24)(Stress-activated protein kinase JNK1)(c-Jun N-terminal kinase 1)	ENSMUSG00000021936
5011	1.11881	13	0	Ercc2	TFIIH basal transcription factor complex helicase subunit (EC 3.6.1.-)(DNA repair protein complementing XP-D cells)(Xeroderma pigmentosum group D-complementing protein)(CXPD)(DNA excision repair protein ERCC-2)	ENSMUSG00000030400
5127	1.10156	41	27	Fgfr1	Basic fibroblast growth factor receptor 1 Precursor (FGFR-1)(bFGF-R)(EC 2.7.10.1)(MFR)(CD331 antigen)	ENSMUSG00000031565
5150	1.09901	11	0	Igf1r	Insulin-like growth factor 1 receptor Precursor (EC 2.7.10.1)(Insulin-like growth factor I receptor)(IGF-I receptor)(CD221 antigen)	ENSMUSG00000005533
5173	1.09615	14	3	Il7	Interleukin-7 Precursor (IL-7)	ENSMUSG00000040329
5202	1.09189	102	84	Terf2	Telomeric repeat-binding factor 2 (TTAGGG repeat-binding factor 2)(Telomeric DNA-binding protein)	ENSMUSG00000031921
5210	1.09028	57	43	Myc	Myc proto-oncogene protein (c-Myc)(Transcription factor p64)	ENSMUSG00000022346
5285	1.08029	48	36	Hsf1	Heat shock factor protein 1 (HSF 1)(Heat shock transcription factor 1)(HSTF 1)	ENSMUSG00000022556
5342	1.07339	17	8	Hic1	Hypermethylated in cancer 1 protein (Hic-1)	ENSMUSG00000043099
5390	1.0679	73	61	Sod2	Superoxide dismutase	ENSMUSG00000006818
5417	1.06383	150	134	Map3k5	Mitogen-activated protein kinase kinase kinase 5 (EC 2.7.11.25)(MAPK/ERK kinase kinase 5)(MEK kinase 5)(MEKK 5)(Apoptosis signal-regulating kinase 1)(ASK-1)	ENSMUSG00000071369
5466	1.05833	27	19	Rad52	DNA repair protein RAD52 homolog	ENSMUSG00000030166
5491	1.05505	15	8	Dll3	Delta-like protein 3 Precursor (Drosophila Delta homolog 3)(Delta3)(M-Delta-3)	ENSMUSG00000003436
5512	1.05061	5629	5352	Clu	Clusterin Precursor (Sulfated glycoprotein 2)(SGP-2)(Clustrin)(Apolipoprotein J)(Apo-J)	ENSMUSG00000022037
5610	1.04215	345	326	Mapk14	Mitogen-activated protein kinase 14 (EC 2.7.11.24)(Mitogen-activated protein kinase p38 alpha)(MAP kinase p38 alpha)(CRK1)	ENSMUSG00000053436
5614	1.04145	101	92	Plau	Urokinase-type plasminogen activator Precursor (U-plasminogen activator)(uPA)(EC 3.4.21.73)	ENSMUSG00000021822
5641	1.0396	5	0	S100b	Protein S100-B (S100 calcium-binding protein B)(S-100 protein subunit beta)(S-100 protein beta chain)	ENSMUSG00000033208
5703	1.03557	162	152	Sp1	Transcription factor Sp1	ENSMUSG00000001280
5713	1.03306	25	20	Ercc4	DNA repair endonuclease XPF (EC 3.1.-.-)(DNA excision repair protein ERCC-4)	ENSMUSG00000022545
5716	1.03252	27	22	Fos	Proto-oncogene protein c-fos (Cellular oncogene fos)	ENSMUSG00000021250
5753	1.0297	4	0	Uchl1	Ubiquitin carboxyl-terminal hydrolase isozyme L1 (UCH-L1)(EC 3.4.19.12)(EC 6.-.-.-)(Ubiquitin thioesterase L1)(Neuron cytoplasmic protein 9.5)(PGP 9.5)(PGP9.5)	ENSMUSG00000029223
5790	1.02913	6	2	Ucp2	Mitochondrial uncoupling protein 2 (UCP 2)(UCPH)	ENSMUSG00000033685
5847	1.02008	154	148	Sirt1	NAD-dependent deacetylase sirtuin-1 (EC 3.5.1.-)(SIR2alpha)(mSIR2a)(Sir2)(SIR2-like protein 1)	ENSMUSG00000020063
5930	1.01923	112	107	Ercc3	TFIIH basal transcription factor complex helicase XPB subunit (EC 3.6.1.-)(Basic transcription factor 2 89 kDa subunit)(BTF2-p89)(TFIIH 89 kDa subunit)(DNA repair protein complementing XP-B cells)(Xeroderma pigmentosum group B-complementing protein)(DNA excision repair protein ERCC-3)	ENSMUSG00000024382
6071	1.00971	4	2	Bcl2	Apoptosis regulator Bcl-2	ENSMUSG00000057329
6121	1.0082	23	21	Lmnb1	Lamin-B1	ENSMUSG00000024590
6131	1.00746	35	33	Pold1	DNA polymerase delta catalytic subunit (EC 2.7.7.7)	ENSMUSG00000038644
6133	1.0069	1067	1058	Top1	DNA topoisomerase 1 (EC 5.99.1.2)(DNA topoisomerase I)	ENSMUSG00000070544
6980	1	1	0	Hesx1	Homeobox expressed in ES cells 1 (Homeobox protein ANF)(Anterior-restricted homeobox protein)(Rathke pouch homeo box)	ENSMUSG00000040726
6987	1	0	1	Bub1b	Mitotic checkpoint serine/threonine-protein kinase BUB1 beta (EC 2.7.11.1)(MAD3/BUB1-related protein kinase)(BubR1)(Mitotic checkpoint kinase MAD3L)	ENSMUSG00000040084
7001	1	0	0	Irs2	Insulin receptor substrate 2 (IRS-2)(4PS)	ENSMUSG00000038894
7113	1	0	1	Ptgs2	Prostaglandin G/H synthase 2 Precursor (EC 1.14.99.1)(Cyclooxygenase-2)(COX-2)(Prostaglandin-endoperoxide synthase 2)(Prostaglandin H2 synthase 2)(PGH synthase 2)(PGHS-2)(PHS II)(Glucocorticoid-regulated inflammatory cyclooxygenase)(Gripghs)(TIS10 protein)(Macrophage activation-associated marker protein P71/73)(PES-2)	ENSMUSG00000032487
7298	1	2	1	Sncg	Gamma-synuclein (Persyn)	ENSMUSG00000023064
7305	1	3	2	Adcy5	Adenylate cyclase type 5 (EC 4.6.1.1)(Adenylate cyclase type V)(ATP pyrophosphate-lyase 5)(Adenylyl cyclase 5)	ENSMUSG00000022840
7441	1	0	0	Foxm1	Forkhead box protein M1 (Forkhead homolog 16)(Winged-helix transcription factor Trident)	ENSMUSG00000001517
7452	0.99569	131	131	Stat5b	Signal transducer and activator of transcription 5B	ENSMUSG00000020919
8607	0.990196	1	1	Hoxb7	Homeobox protein Hox-B7 (Hox-2.3)(MUB1)(Homeobox protein MH-22B)	ENSMUSG00000038721
8664	0.990196	0	1	Plcg2	1-phosphatidylinositol-4,5-bisphosphate phosphodiesterase gamma-2 (EC 3.1.4.11)(Phosphoinositide phospholipase C)(Phospholipase C-gamma-2)(PLC-gamma-2)	ENSMUSG00000034330
8937	0.990196	0	2	Fgf23	Fibroblast growth factor 23 Precursor (FGF-23)	ENSMUSG00000000182
8965	0.983607	20	21	Brca2	Breast cancer type 2 susceptibility protein homolog (Fanconi anemia group D1 protein homolog)	ENSMUSG00000041147
9657	0.980583	0	3	Il6	Interleukin-6 Precursor (IL-6)(Interleukin HP-1)(B-cell hybridoma growth factor)	ENSMUSG00000025746
9723	0.980583	0	3	Il7r	Interleukin-7 receptor subunit alpha Precursor (IL-7R-alpha)(CD127 antigen)	ENSMUSG00000003882
10098	0.971154	1	3	Bdnf	Brain-derived neurotrophic factor Precursor (BDNF)	ENSMUSG00000048482
10116	0.971154	0	4	Cdkn2a	Cyclin-dependent kinase inhibitor 2A, isoform 3 (p19ARF)	ENSMUSG00000044303
10172	0.971154	1	3	Ret	Proto-oncogene tyrosine-protein kinase receptor ret Precursor (C-ret)(EC 2.7.10.1)	ENSMUSG00000030110
10432	0.961905	0	5	Hoxc4	Homeobox protein Hox-C4 (Hox-3.5)	ENSMUSG00000075394
10672	0.956522	32	37	Epor	Erythropoietin receptor Precursor (EPO-R)	ENSMUSG00000006235
10894	0.95283	0	6	Pin1	Peptidyl-prolyl cis-trans isomerase NIMA-interacting 1 (EC 5.2.1.8)(Rotamase Pin1)(PPIase Pin1)	ENSMUSG00000032171
10978	0.947368	44	51	Rad51	DNA repair protein RAD51 homolog 1	ENSMUSG00000027323
11220	0.943925	0	6	Top2a	DNA topoisomerase 2-alpha (EC 5.99.1.3)(DNA topoisomerase II, alpha isozyme)	ENSMUSG00000020914
11249	0.942675	196	213	Lmna	Lamin-A/C	ENSMUSG00000028063
11470	0.935185	0	8	Tgfb1	Transforming growth factor beta-1 Precursor (TGF-beta-1)	ENSMUSG00000002603
11481	0.933824	27	35	Tcf3	Transcription factor 7-like 1 (HMG box transcription factor 3)(TCF-3)(mTCF-3)	ENSMUSG00000055799
11653	0.926606	0	9	Il2rg	Uncharacterized protein LOC158830 homolog	ENSMUSG00000031304
11907	0.915966	227	256	Parp1	Poly	ENSMUSG00000026496
12106	0.903509	3	13	Egr1	Early growth response protein 1 (EGR-1)(Protein Krox-24)(Transcription factor Zif268)(Nerve growth factor-induced protein A)(NGFI-A)	ENSMUSG00000038418
12411	0.887931	3	15	Egf	Pro-epidermal growth factor Precursor (EGF)	ENSMUSG00000028017
12618	0.878261	1	14	Hells	Lymphocyte-specific helicase (EC 3.6.1.-)(Proliferation associated SNF2-like protein)	ENSMUSG00000025001
12656	0.87395	4	18	Aptx	Aprataxin (EC 3.-.-.-)(Forkhead-associated domain histidine triad-like protein)(FHA-HIT)	ENSMUSG00000028411
12755	0.87069	0	16	Tnf	Tumor necrosis factor Precursor (TNF-alpha)(Tumor necrosis factor ligand superfamily member 2)(TNF-a)(Cachectin)	ENSMUSG00000024401
12792	0.865225	940	1101	Vegfa	Vascular endothelial growth factor A Precursor (VEGF-A)(Vascular permeability factor)(VPF)	ENSMUSG00000023951
12973	0.855932	0	18	Ngf	Beta-nerve growth factor Precursor (Beta-NGF)	ENSMUSG00000027859
13024	0.848812	293	362	Hif1a	Hypoxia-inducible factor 1 alpha (HIF-1 alpha)(HIF1 alpha)(ARNT-interacting protein)	ENSMUSG00000021109
13074	0.848739	1	18	Brca1	Breast cancer type 1 susceptibility protein homolog	ENSMUSG00000017146
13204	0.837838	24	47	Htt	Huntingtin (Huntington disease protein homolog)(HD protein homolog)	ENSMUSG00000029104
13384	0.825316	226	294	Nfkb1	Nuclear factor NF-kappa-B p105 subunit (DNA-binding factor KBF1)(EBP-1)(NF-kappa-B1 p84/NF-kappa-B1 p98)	ENSMUSG00000028163
13397	0.823529	124	171	Jun	Transcription factor AP-1 (Activator protein 1)(AP1)(Proto-oncogene c-jun)(V-jun avian sarcoma virus 17 oncogene homolog)(Jun A)(AH119)	ENSMUSG00000052684
13399	0.823232	63	97	Ar	Androgen receptor (Dihydrotestosterone receptor)(Nuclear receptor subfamily 3 group C member 4)	ENSMUSG00000046532
13578	0.808824	65	103	Nfkb2	Nuclear factor NF-kappa-B p100 subunit (DNA-binding factor KBF2)	ENSMUSG00000025225
13622	0.808	0	25	E2f1	Transcription factor E2F1 (E2F-1)	ENSMUSG00000027490
13868	0.788253	410	546	Egfr	Epidermal growth factor receptor Precursor (EC 2.7.10.1)	ENSMUSG00000020122
14021	0.772727	2	31	Mapt	Microtubule-associated protein tau (Neurofibrillary tangle protein)(Paired helical filament-tau)(PHF-tau)	ENSMUSG00000018411
14153	0.76087	145	221	Sin3a	Paired amphipathic helix protein Sin3a (Transcriptional corepressor Sin3a)(Histone deacetylase complex subunit Sin3a)	ENSMUSG00000042557
14160	0.760234	30	70	Ppm1d	Protein phosphatase 1D (EC 3.1.3.16)(Protein phosphatase 2C isoform delta)(PP2C-delta)(p53-induced protein phosphatase 1)(Protein phosphatase magnesium-dependent 1 delta)	ENSMUSG00000020525
14190	0.759398	0	33	Cacna1a	Voltage-dependent P/Q-type calcium channel subunit alpha-1A (Voltage-gated calcium channel subunit alpha Cav2.1)(Calcium channel, L type, alpha-1 polypeptide isoform 4)(Brain calcium channel I)(BI)	ENSMUSG00000034656
14204	0.759398	0	33	Pou1f1	Pituitary-specific positive transcription factor 1 (Pit-1)(Growth hormone factor 1)(GHF-1)	ENSMUSG00000004842
14352	0.742773	1159	1594	Nfkbia	NF-kappa-B inhibitor alpha (I-kappa-B-alpha)(IkappaBalpha)(IkB-alpha)	ENSMUSG00000021025
14507	0.728643	45	98	Taf1	Transcription initiation factor TFIID subunit 1 (EC 2.7.11.1)(Transcription initiation factor TFIID 250 kDa subunit)(TAF(II)250)(TAFII-250)(TAFII250)(TBP-associated factor 250 kDa)(p250)(Cell cycle gene 1 protein)	ENSMUSG00000031314
14594	0.721429	0	40	Blm	Bloom syndrome protein homolog (mBLM)(EC 3.6.1.-)	ENSMUSG00000030528
14796	0.700095	640	956	Cebpb	CCAAT/enhancer-binding protein beta (C/EBP beta)(Interleukin-6-dependent-binding protein)(IL-6DBP)(Liver-enriched transcriptional activator)(LAP)(AGP/EBP)	ENSMUSG00000056501
14804	0.699095	209	341	Nbn	Nibrin (Nijmegen breakage syndrome protein 1 homolog)(Cell cycle regulatory protein p95)	ENSMUSG00000028224
14838	0.695198	233	378	Pcmt1	Protein-L-isoaspartate(D-aspartate) O-methyltransferase (PIMT)(EC 2.1.1.77)(Protein-beta-aspartate methyltransferase)(Protein L-isoaspartyl/D-aspartyl methyltransferase)(L-isoaspartyl protein carboxyl methyltransferase)	ENSMUSG00000019795
14960	0.681818	50	119	H2afx	Histone H2A.x (H2a/x)	ENSMUSG00000049932
15043	0.670699	3448	5189	Pck1	Phosphoenolpyruvate carboxykinase, cytosolic	ENSMUSG00000027513
15278	0.643617	142	275	Coq7	Ubiquinone biosynthesis protein COQ7 homolog (Coenzyme Q biosynthesis protein 7 homolog)(Timing protein clk-1 homolog)	ENSMUSG00000030652
15303	0.642173	101	212	Top2b	DNA topoisomerase 2-beta (EC 5.99.1.3)(DNA topoisomerase II, beta isozyme)	ENSMUSG00000017485
15323	0.639241	0	58	Ccna2	Cyclin-A2 (Cyclin-A)	ENSMUSG00000027715
15572	0.608434	0	66	Ppp1ca	Serine/threonine-protein phosphatase PP1-alpha catalytic subunit (PP-1A)(EC 3.1.3.16)	ENSMUSG00000040385
15574	0.608434	0	65	Pml	Probable transcription factor PML	ENSMUSG00000036986
15653	0.596774	48	147	Ptpn1	Tyrosine-protein phosphatase non-receptor type 1 (EC 3.1.3.48)(Protein-tyrosine phosphatase 1B)(PTP-1B)(Protein-protein-tyrosine phosphatase HA2)(PTP-HA2)	ENSMUSG00000027540
15709	0.589595	2	72	Pola1	DNA polymerase alpha catalytic subunit (EC 2.7.7.7)	ENSMUSG00000006678
15807	0.575071	103	252	Esr1	Estrogen receptor (ER)(Estradiol receptor)(ER-alpha)(Nuclear receptor subfamily 3 group A member 1)	ENSMUSG00000019768
15858	0.565789	29	127	Stat5a	Signal transducer and activator of transcription 5A (Mammary gland factor)	ENSMUSG00000004043
16043	0.539095	31	142	Clock	Circadian locomoter output cycles protein kaput (mCLOCK)(EC 2.3.1.48)	ENSMUSG00000029238
16063	0.536817	126	320	Arntl	Aryl hydrocarbon receptor nuclear translocator-like protein 1 (Brain and muscle ARNT-like 1)(Arnt3)	ENSMUSG00000055116
16090	0.532508	72	222	Rb1	Retinoblastoma-associated protein (pRb)(Rb)(pp105)	ENSMUSG00000022105
16108	0.530516	13	112	Mlh1	DNA mismatch repair protein Mlh1 (MutL protein homolog 1)	ENSMUSG00000032498
16124	0.52657	118	313	Shc1	SHC-transforming protein 1 (Src homology 2 domain-containing-transforming protein C1)(SH2 domain protein C1)	ENSMUSG00000042626
16341	0.497585	3	106	Pdgfrb	Beta-type platelet-derived growth factor receptor Precursor (EC 2.7.10.1)(PDGF-R-beta)(CD140 antigen-like family member B)(CD140b antigen)	ENSMUSG00000024620
16424	0.483776	228	577	Hdac2	Histone deacetylase 2 (HD2)(EC 3.5.1.98)(YY1 transcription factor-binding protein)	ENSMUSG00000019777
16448	0.480315	22	153	Prkcd	Protein kinase C delta type (EC 2.7.11.13)(nPKC-delta)	ENSMUSG00000021948
16495	0.474576	12	135	Wrn	Werner syndrome ATP-dependent helicase homolog (EC 3.6.1.-)	ENSMUSG00000031583
16614	0.454225	29	183	Efemp1	EGF-containing fibulin-like extracellular matrix protein 1 Precursor (Fibulin-3)(FIBL-3)	ENSMUSG00000020467
16695	0.443535	171	510	Rela	Transcription factor p65 (Nuclear factor NF-kappa-B p65 subunit)	ENSMUSG00000024927
16891	0.413722	29676	71870	Apoe	Apolipoprotein E Precursor (Apo-E)	ENSMUSG00000002985
16892	0.413655	3	148	Mapk3	Mitogen-activated protein kinase 3 (EC 2.7.11.24)(Extracellular signal-regulated kinase 1)(ERK-1)(Insulin-stimulated MAP2 kinase)(MAP kinase 1)(MAPK 1)(p44-ERK1)(ERT2)(p44-MAPK)(Microtubule-associated protein 2 kinase)(MNK1)	ENSMUSG00000063065
16908	0.41129	2	147	Hspa8	Heat shock cognate 71 kDa protein (Heat shock 70 kDa protein 8)	ENSMUSG00000015656
16935	0.40625	30	219	Tfdp1	Transcription factor Dp-1 (E2F dimerization partner 1)(DRTF1-polypeptide 1)	ENSMUSG00000038482
16973	0.400324	394	1133	Gss	Glutathione synthetase (EC 6.3.2.3)(Glutathione synthase)(GSH synthetase)(GSH-S)	ENSMUSG00000027610
17003	0.395753	105	417	Pcna	Proliferating cell nuclear antigen (PCNA)(Cyclin)	ENSMUSG00000027342
17009	0.393755	7794	19947	Hsp90aa1	Heat shock protein HSP 90-alpha (HSP 86)(Tumor-specific transplantation 86 kDa antigen)(TSTA)	ENSMUSG00000021270
17151	0.370288	67	350	Fas	Tumor necrosis factor receptor superfamily member 6 Precursor (FASLG receptor)(Apoptosis-mediating surface antigen FAS)(Apo-1 antigen)(CD95 antigen)	ENSMUSG00000024778
17164	0.366906	2	177	Stub1	STIP1 homology and U box-containing protein 1 (EC 6.3.2.-)(Carboxy terminus of Hsp70-interacting protein)(E3 ubiquitin-protein ligase CHIP)	ENSMUSG00000039615
17201	0.360714	0	179	Il2	Interleukin-2 Precursor (IL-2)(T-cell growth factor)(TCGF)	ENSMUSG00000027720
17206	0.358601	23	242	Apex1	DNA-(apurinic or apyrimidinic site) lyase (EC 4.2.99.18)(Apurinic-apyrimidinic endonuclease 1)(AP endonuclease 1)(APEX nuclease)(APEN)	ENSMUSG00000035960
17224	0.356618	24272	68241	Eef1a1	Elongation factor 1-alpha 1 (EF-1-alpha-1)(Elongation factor 1 A-1)(eEF1A-1)(Elongation factor Tu)(EF-Tu)	ENSMUSG00000037742
17457	0.320148	159	708	Mdm2	E3 ubiquitin-protein ligase Mdm2 (EC 6.3.2.-)(p53-binding protein Mdm2)(Oncoprotein Mdm2)(Double minute 2 protein)	ENSMUSG00000020184
17485	0.316614	0	219	Fen1	Flap endonuclease 1 (FEN-1)(EC 3.1.-.-)(Flap structure-specific endonuclease 1)	ENSMUSG00000024742
17537	0.307919	631	2273	Msra	Peptide methionine sulfoxide reductase (EC 1.8.4.11)(Protein-methionine-S-oxide reductase)(PMSR)(Peptide-methionine (S)-S-oxide reductase)(Peptide Met(O) reductase)	ENSMUSG00000054733
17566	0.302198	10	263	Polg	DNA polymerase subunit gamma-1 (EC 2.7.7.7)(Mitochondrial DNA polymerase catalytic subunit)(PolG-alpha)	ENSMUSG00000039176
17764	0.267176	110	685	Bax	Apoptosis regulator BAX	ENSMUSG00000003873
17769	0.266491	0	279	Hdac1	Histone deacetylase 1 (HD1)(EC 3.5.1.98)	ENSMUSG00000028800
17828	0.254321	3	304	Frap1	FKBP12-rapamycin complex-associated protein (FK506-binding protein 12-rapamycin complex-associated protein 1)(Rapamycin target protein)(RAPT1)(Mammalian target of rapamycin)(mTOR)	ENSMUSG00000028991
18031	0.216274	0	366	Pex5	Peroxisomal targeting signal 1 receptor (PTS1 receptor)(PTS1R)(Peroxisome receptor 1)(Peroxisomal C-terminal targeting signal import receptor)(PTS1-BP)(Peroxin-5)(PXR1P)	ENSMUSG00000005069
18215	0.182429	687	4213	Gclc	Glutamate--cysteine ligase catalytic subunit (EC 6.3.2.2)(Gamma-glutamylcysteine synthetase)(Gamma-ECS)(GCS heavy chain)	ENSMUSG00000032350
18444	0.138736	0	628	Bmi1	Polycomb complex protein BMI-1 (Polycomb group RING finger protein 4)	ENSMUSG00000026739
18487	0.131148	76	1241	Aifm1	Apoptosis-inducing factor 1, mitochondrial Precursor (EC 1.-.-.-)(Programmed cell death protein 8)	ENSMUSG00000036932
18488	0.130707	109	1498	Gclm	Glutamate--cysteine ligase regulatory subunit (Gamma-glutamylcysteine synthetase regulatory subunit)(Gamma-ECS regulatory subunit)(GCS light chain)(Glutamate--cysteine ligase modifier subunit)	ENSMUSG00000028124
18489	0.130175	1296	10623	Rgn	Regucalcin (RC)(Senescence marker protein 30)(SMP-30)	ENSMUSG00000023070
18794	0.0694362	17	1584	Gsta4	Glutathione S-transferase A4 (EC 2.5.1.18)(GST A4-4)(GSTA4-4)(Glutathione S-transferase 5.7)(GST 5.7)(GST class-alpha member 4)	ENSMUSG00000032348
18812	0.0676037	1	1393	Hmgb1	High mobility group protein B1 (High mobility group protein 1)(HMG-1)	ENSMUSG00000066551
18912	0.0498028	0	1928	Atp5o	ATP synthase subunit O, mitochondrial Precursor (Oligomycin sensitivity conferral protein)(OSCP)	ENSMUSG00000022956
18935	0.045516	0	2119	Igf1	Insulin-like growth factor I Precursor (IGF-I)(Somatomedin)	ENSMUSG00000020053
18939	0.0447831	2277	52977	Gpx4	Phospholipid hydroperoxide glutathione peroxidase, mitochondrial Precursor (PHGPx)(EC 1.11.1.12)(GPX-4)	ENSMUSG00000075706
19015	0.0325491	0	3003	Pon1	Serum paraoxonase/arylesterase 1 (PON 1)(EC 3.1.1.2)(EC 3.1.8.1)(Serum aryldialkylphosphatase 1)(A-esterase 1)(Aromatic esterase 1)	ENSMUSG00000002588
19071	0.0246557	11	4401	Agpat2	1-acyl-sn-glycerol-3-phosphate acyltransferase beta (EC 2.3.1.51)(1-AGP acyltransferase 2)(1-AGPAT 2)(Lysophosphatidic acid acyltransferase beta)(LPAAT-beta)(1-acylglycerol-3-phosphate O-acyltransferase 2)	ENSMUSG00000026922
19099	0.018752	2210	123086	Gpx1	Glutathione peroxidase 1 (EC 1.11.1.9)(GSHPx-1)(GPx-1)(Cellular glutathione peroxidase)	ENSMUSG00000063856
19211	0.00507614	0	19797	Gstp1	Glutathione S-transferase P 1 (Gst P1)(EC 2.5.1.18)(GST YF-YF)(GST-piB)(GST class-pi)(Preadipocyte growth factor)	ENSMUSG00000060803
19800	0.00695915	38	19729	Gstp1	ENSMUSG00000060803	Glutathione S-transferase P 1 (Gst P1)(EC 2.5.1.18)(GST YF-YF)(GST-piB)(GST class-pi)(Preadipocyte growth factor)
19860	0.00139878	0	72106	Apoe	ENSMUSG00000002985	Apolipoprotein E Precursor (Apo-E)
