# Supplementary material for: RNA Sequencing Reveals Differential Expression of Mitochondrial and Oxidation Reduction Genes in the Long-Lived Naked Mole-Rat When Compared to Mice
Source: PLoS One. 2011 Nov 3;6(11):e26729. doi: 10.1371/journal.pone.0026729 (PMC3207814; doi:10.1371/journal.pone.0026729)
Supplement: Dataset S3 — Full results from DAVID enrichment analysis of genes over-expressed in the naked mole-rat. Number at the end of worksheet name indicates fold change over-expression (5-, 10- and 15-fold over-expression) used as cutoff for selecting genes. (XLS) [file pone.0026729.s003.xls]

## Sheet: FC_5
Category	Term	Count	%	PValue	Genes	Bonferroni	Benjamini
SP_PIR_KEYWORDS	mitochondrion	66	10	8.10715e-07	ENSMUSG00000022706, ENSMUSG00000025968, ENSMUSG00000022452, ENSMUSG00000036833, ENSMUSG00000058076, ENSMUSG00000031641, ENSMUSG00000064345, ENSMUSG00000021622, ENSMUSG00000006057, ENSMUSG00000030945, ENSMUSG00000024012, ENSMUSG00000021967, ENSMUSG00000021868, ENSMUSG00000028601, ENSMUSG00000035202, ENSMUSG00000032047, ENSMUSG00000032786, ENSMUSG00000015112, ENSMUSG00000039163, ENSMUSG00000025745,…	0.000337201	0.000337201
SP_PIR_KEYWORDS	acetylation	150	22.7273	1.14124e-06	ENSMUSG00000025968, ENSMUSG00000023456, ENSMUSG00000032399, ENSMUSG00000018199, ENSMUSG00000029430, ENSMUSG00000035284, ENSMUSG00000069835, ENSMUSG00000031715, ENSMUSG00000028443, ENSMUSG00000000948, ENSMUSG00000035376, ENSMUSG00000030062, ENSMUSG00000035202, ENSMUSG00000032047, ENSMUSG00000001525, ENSMUSG00000031708, ENSMUSG00000062376, ENSMUSG00000031792, ENSMUSG00000053398, ENSMUSG00000032437,…	0.000474644	0.00023735
SP_PIR_KEYWORDS	oxidoreductase	44	6.66667	4.66593e-06	ENSMUSG00000020000, ENSMUSG00000025968, ENSMUSG00000025260, ENSMUSG00000028691, ENSMUSG00000005514, ENSMUSG00000063229, ENSMUSG00000038489, ENSMUSG00000026692, ENSMUSG00000022570, ENSMUSG00000031641, ENSMUSG00000029455, ENSMUSG00000027015, ENSMUSG00000064345, ENSMUSG00000034785, ENSMUSG00000029311, ENSMUSG00000042096, ENSMUSG00000064367, ENSMUSG00000058709, ENSMUSG00000026170, ENSMUSG00000062867,…	0.00193915	0.000646801
SP_PIR_KEYWORDS	transit peptide	44	6.66667	7.21811e-06	ENSMUSG00000029198, ENSMUSG00000022706, ENSMUSG00000025968, ENSMUSG00000021607, ENSMUSG00000074064, ENSMUSG00000022452, ENSMUSG00000005299, ENSMUSG00000058076, ENSMUSG00000029455, ENSMUSG00000052962, ENSMUSG00000021622, ENSMUSG00000006057, ENSMUSG00000030945, ENSMUSG00000026170, ENSMUSG00000033429, ENSMUSG00000040618, ENSMUSG00000028622, ENSMUSG00000030045, ENSMUSG00000027809, ENSMUSG00000021868,…	0.00299824	0.000750404
SP_PIR_KEYWORDS	nad	17	2.57576	0.00135879	ENSMUSG00000025968, ENSMUSG00000025260, ENSMUSG00000063229, ENSMUSG00000053398, ENSMUSG00000025745, ENSMUSG00000031641, ENSMUSG00000025153, ENSMUSG00000029455, ENSMUSG00000064345, ENSMUSG00000064367, ENSMUSG00000009292, ENSMUSG00000062867, ENSMUSG00000023019, ENSMUSG00000038936, ENSMUSG00000031604, ENSMUSG00000024066, ENSMUSG00000027227	0.432003	0.106964
SP_PIR_KEYWORDS	endoplasmic reticulum	46	6.9697	0.00144038	ENSMUSG00000020000, ENSMUSG00000021608, ENSMUSG00000005514, ENSMUSG00000040236, ENSMUSG00000036833, ENSMUSG00000029616, ENSMUSG00000038489, ENSMUSG00000026692, ENSMUSG00000040462, ENSMUSG00000021703, ENSMUSG00000019877, ENSMUSG00000031483, ENSMUSG00000036985, ENSMUSG00000052428, ENSMUSG00000024083, ENSMUSG00000034785, ENSMUSG00000054766, ENSMUSG00000021928, ENSMUSG00000030082, ENSMUSG00000054545,…	0.450985	0.0951066
SP_PIR_KEYWORDS	nadp	14	2.12121	0.00345717	ENSMUSG00000005514, ENSMUSG00000030905, ENSMUSG00000026692, ENSMUSG00000022570, ENSMUSG00000031641, ENSMUSG00000025153, ENSMUSG00000028378, ENSMUSG00000029311, ENSMUSG00000026170, ENSMUSG00000021273, ENSMUSG00000034449, ENSMUSG00000015806, ENSMUSG00000003484, ENSMUSG00000030088	0.763232	0.186013
SP_PIR_KEYWORDS	lipid synthesis	11	1.66667	0.00475064	ENSMUSG00000023456, ENSMUSG00000027875, ENSMUSG00000074064, ENSMUSG00000031708, ENSMUSG00000034926, ENSMUSG00000021273, ENSMUSG00000031641, ENSMUSG00000031604, ENSMUSG00000025153, ENSMUSG00000020917, ENSMUSG00000029311	0.862065	0.219345
SP_PIR_KEYWORDS	lipid metabolism	13	1.9697	0.0063316	ENSMUSG00000040451, ENSMUSG00000030861, ENSMUSG00000028048, ENSMUSG00000025745, ENSMUSG00000021703, ENSMUSG00000019877, ENSMUSG00000049313, ENSMUSG00000030945, ENSMUSG00000024900, ENSMUSG00000030972, ENSMUSG00000028601, ENSMUSG00000030935, ENSMUSG00000024132	0.928804	0.254419
SP_PIR_KEYWORDS	lysosome	15	2.27273	0.00673107	ENSMUSG00000058446, ENSMUSG00000033540, ENSMUSG00000036833, ENSMUSG00000034707, ENSMUSG00000028048, ENSMUSG00000029426, ENSMUSG00000028699, ENSMUSG00000035847, ENSMUSG00000025351, ENSMUSG00000022500, ENSMUSG00000021939, ENSMUSG00000021665, ENSMUSG00000079557, ENSMUSG00000026958, ENSMUSG00000030894	0.93977	0.244941
SP_PIR_KEYWORDS	heme	10	1.51515	0.00688689	ENSMUSG00000026170, ENSMUSG00000037190, ENSMUSG00000005413, ENSMUSG00000058076, ENSMUSG00000038489, ENSMUSG00000030895, ENSMUSG00000063694, ENSMUSG00000027015, ENSMUSG00000003484, ENSMUSG00000052914	0.943576	0.229989
SP_PIR_KEYWORDS	ribosomal protein	14	2.12121	0.01028	ENSMUSG00000022706, ENSMUSG00000021607, ENSMUSG00000032399, ENSMUSG00000052962, ENSMUSG00000038274, ENSMUSG00000029486, ENSMUSG00000041841, ENSMUSG00000060938, ENSMUSG00000021967, ENSMUSG00000028622, ENSMUSG00000014551, ENSMUSG00000030045, ENSMUSG00000057863, ENSMUSG00000039209	0.986413	0.30108
SP_PIR_KEYWORDS	ribonucleoprotein	19	2.87879	0.011906	ENSMUSG00000060739, ENSMUSG00000022706, ENSMUSG00000032399, ENSMUSG00000021607, ENSMUSG00000056851, ENSMUSG00000018199, ENSMUSG00000057278, ENSMUSG00000052962, ENSMUSG00000026127, ENSMUSG00000038274, ENSMUSG00000029486, ENSMUSG00000041841, ENSMUSG00000060938, ENSMUSG00000000948, ENSMUSG00000021967, ENSMUSG00000028622, ENSMUSG00000014551, ENSMUSG00000057863, ENSMUSG00000030045	0.993144	0.318376
SP_PIR_KEYWORDS	ubiquinone	5	0.757576	0.0143097	ENSMUSG00000025968, ENSMUSG00000064367, ENSMUSG00000027809, ENSMUSG00000064345, ENSMUSG00000024038	0.997511	0.348367
SP_PIR_KEYWORDS	multifunctional enzyme	8	1.21212	0.0146163	ENSMUSG00000025648, ENSMUSG00000002428, ENSMUSG00000021273, ENSMUSG00000022570, ENSMUSG00000025220, ENSMUSG00000025745, ENSMUSG00000025153, ENSMUSG00000001155	0.997813	0.335254
SP_PIR_KEYWORDS	Steroid biosynthesis	6	0.909091	0.0170969	ENSMUSG00000027875, ENSMUSG00000031708, ENSMUSG00000034926, ENSMUSG00000021273, ENSMUSG00000031604, ENSMUSG00000029311	0.999234	0.361327
SP_PIR_KEYWORDS	fatty acid metabolism	8	1.21212	0.0196127	ENSMUSG00000030945, ENSMUSG00000024900, ENSMUSG00000030861, ENSMUSG00000025745, ENSMUSG00000030935, ENSMUSG00000028601, ENSMUSG00000030972, ENSMUSG00000024132	0.999736	0.38412
SP_PIR_KEYWORDS	Acyltransferase	13	1.9697	0.0237727	ENSMUSG00000021608, ENSMUSG00000032786, ENSMUSG00000025220, ENSMUSG00000027185, ENSMUSG00000069835, ENSMUSG00000025153, ENSMUSG00000036985, ENSMUSG00000063683, ENSMUSG00000024900, ENSMUSG00000002797, ENSMUSG00000024973, ENSMUSG00000026643, ENSMUSG00000032047	0.999955	0.42653
SP_PIR_KEYWORDS	mitochondrion inner membrane	15	2.27273	0.0253682	ENSMUSG00000025968, ENSMUSG00000005299, ENSMUSG00000058076, ENSMUSG00000015112, ENSMUSG00000016252, ENSMUSG00000064345, ENSMUSG00000021622, ENSMUSG00000037152, ENSMUSG00000064367, ENSMUSG00000015790, ENSMUSG00000000308, ENSMUSG00000024012, ENSMUSG00000031633, ENSMUSG00000027809, ENSMUSG00000024038	0.999977	0.430272
SP_PIR_KEYWORDS	Aminopeptidase	5	0.757576	0.0278224	ENSMUSG00000032393, ENSMUSG00000026958, ENSMUSG00000039062, ENSMUSG00000026269, ENSMUSG00000036112	0.999992	0.443957
SP_PIR_KEYWORDS	selenium	5	0.757576	0.0320743	ENSMUSG00000075705, ENSMUSG00000041571, ENSMUSG00000029173, ENSMUSG00000049091, ENSMUSG00000034785	0.999999	0.475752
SP_PIR_KEYWORDS	electron transport	10	1.51515	0.0359444	ENSMUSG00000025968, ENSMUSG00000037152, ENSMUSG00000064367, ENSMUSG00000037190, ENSMUSG00000058076, ENSMUSG00000027809, ENSMUSG00000063694, ENSMUSG00000027015, ENSMUSG00000064345, ENSMUSG00000024038	1	0.499522
SP_PIR_KEYWORDS	signal	106	16.0606	0.0516731	ENSMUSG00000048583, ENSMUSG00000029616, ENSMUSG00000030111, ENSMUSG00000032978, ENSMUSG00000021728, ENSMUSG00000040037, ENSMUSG00000032440, ENSMUSG00000022261, ENSMUSG00000041961, ENSMUSG00000030062, ENSMUSG00000002847, ENSMUSG00000022435, ENSMUSG00000046480, ENSMUSG00000079037, ENSMUSG00000041189, ENSMUSG00000030748, ENSMUSG00000038235, ENSMUSG00000002992, ENSMUSG00000021939, ENSMUSG00000027447,…	1	0.616962
SP_PIR_KEYWORDS	Monooxygenase	6	0.909091	0.0569672	ENSMUSG00000020000, ENSMUSG00000026170, ENSMUSG00000038489, ENSMUSG00000026692, ENSMUSG00000003484, ENSMUSG00000052914	1	0.638203
SP_PIR_KEYWORDS	iron	17	2.57576	0.0576088	ENSMUSG00000025968, ENSMUSG00000037190, ENSMUSG00000058076, ENSMUSG00000038489, ENSMUSG00000021993, ENSMUSG00000063694, ENSMUSG00000027015, ENSMUSG00000026170, ENSMUSG00000058709, ENSMUSG00000014956, ENSMUSG00000005413, ENSMUSG00000027809, ENSMUSG00000030895, ENSMUSG00000031604, ENSMUSG00000024066, ENSMUSG00000003484, ENSMUSG00000052914	1	0.62743
SP_PIR_KEYWORDS	isopeptide bond	18	2.72727	0.0618833	ENSMUSG00000038393, ENSMUSG00000001525, ENSMUSG00000029467, ENSMUSG00000035284, ENSMUSG00000029430, ENSMUSG00000028700, ENSMUSG00000074781, ENSMUSG00000037029, ENSMUSG00000054766, ENSMUSG00000010608, ENSMUSG00000061436, ENSMUSG00000028849, ENSMUSG00000071637, ENSMUSG00000035692, ENSMUSG00000031633, ENSMUSG00000015120, ENSMUSG00000010095, ENSMUSG00000057113	1	0.64016
SP_PIR_KEYWORDS	bromodomain	5	0.757576	0.0719036	ENSMUSG00000002748, ENSMUSG00000024335, ENSMUSG00000003778, ENSMUSG00000026918, ENSMUSG00000040054	1	0.683267
SP_PIR_KEYWORDS	microsome	7	1.06061	0.0753968	ENSMUSG00000005413, ENSMUSG00000036833, ENSMUSG00000038489, ENSMUSG00000026692, ENSMUSG00000054545, ENSMUSG00000003484, ENSMUSG00000052914	1	0.687972
SP_PIR_KEYWORDS	sterol biosynthesis	4	0.606061	0.0798647	ENSMUSG00000027875, ENSMUSG00000034926, ENSMUSG00000021273, ENSMUSG00000031604	1	0.696989
SP_PIR_KEYWORDS	nucleotide-binding	82	12.4242	0.0863196	ENSMUSG00000029430, ENSMUSG00000022229, ENSMUSG00000001847, ENSMUSG00000031715, ENSMUSG00000026944, ENSMUSG00000027823, ENSMUSG00000021622, ENSMUSG00000030945, ENSMUSG00000032440, ENSMUSG00000025035, ENSMUSG00000028289, ENSMUSG00000031644, ENSMUSG00000028443, ENSMUSG00000057614, ENSMUSG00000027298, ENSMUSG00000052293, ENSMUSG00000049091, ENSMUSG00000027519, ENSMUSG00000035202, ENSMUSG00000022607,…	1	0.714012
SP_PIR_KEYWORDS	gtp-binding	19	2.87879	0.0893095	ENSMUSG00000020832, ENSMUSG00000001525, ENSMUSG00000062591, ENSMUSG00000029430, ENSMUSG00000001847, ENSMUSG00000037617, ENSMUSG00000046768, ENSMUSG00000007987, ENSMUSG00000025035, ENSMUSG00000028443, ENSMUSG00000040618, ENSMUSG00000057614, ENSMUSG00000041658, ENSMUSG00000020657, ENSMUSG00000042354, ENSMUSG00000024143, ENSMUSG00000024782, ENSMUSG00000027519, ENSMUSG00000026083	1	0.715041
SP_PIR_KEYWORDS	selenocysteine	4	0.606061	0.0897787	ENSMUSG00000075705, ENSMUSG00000041571, ENSMUSG00000049091, ENSMUSG00000034785	1	0.705618
SP_PIR_KEYWORDS	pyridoxal phosphate	6	0.909091	0.0978021	ENSMUSG00000032786, ENSMUSG00000029596, ENSMUSG00000029173, ENSMUSG00000031485, ENSMUSG00000025153, ENSMUSG00000001155	1	0.726768

## Sheet: GO_5
Category	Term	Count	%	PValue	Genes	Bonferroni	Benjamini
GOTERM_CC_FAT	GO:0005759~mitochondrial matrix	25	3.78788	2.08894e-06	ENSMUSG00000022706, ENSMUSG00000029198, ENSMUSG00000021607, ENSMUSG00000031641, ENSMUSG00000029455, ENSMUSG00000030945, ENSMUSG00000021967, ENSMUSG00000028622, ENSMUSG00000014551, ENSMUSG00000027809, ENSMUSG00000030045, ENSMUSG00000021868, ENSMUSG00000035202, ENSMUSG00000024132, ENSMUSG00000003809, ENSMUSG00000032786, ENSMUSG00000030861, ENSMUSG00000025745, ENSMUSG00000021993, ENSMUSG00000063694,…	0.000695377	0.000695377
GOTERM_CC_FAT	GO:0031980~mitochondrial lumen	25	3.78788	2.08894e-06	ENSMUSG00000022706, ENSMUSG00000029198, ENSMUSG00000021607, ENSMUSG00000031641, ENSMUSG00000029455, ENSMUSG00000030945, ENSMUSG00000021967, ENSMUSG00000028622, ENSMUSG00000014551, ENSMUSG00000027809, ENSMUSG00000030045, ENSMUSG00000021868, ENSMUSG00000035202, ENSMUSG00000024132, ENSMUSG00000003809, ENSMUSG00000032786, ENSMUSG00000030861, ENSMUSG00000025745, ENSMUSG00000021993, ENSMUSG00000063694,…	0.000695377	0.000695377
GOTERM_BP_FAT	GO:0055114~oxidation reduction	50	7.57576	6.73609e-06	ENSMUSG00000025968, ENSMUSG00000005514, ENSMUSG00000058076, ENSMUSG00000031641, ENSMUSG00000027015, ENSMUSG00000064345, ENSMUSG00000042096, ENSMUSG00000031604, ENSMUSG00000030088, ENSMUSG00000075705, ENSMUSG00000031708, ENSMUSG00000053398, ENSMUSG00000015112, ENSMUSG00000025745, ENSMUSG00000025153, ENSMUSG00000028378, ENSMUSG00000021273, ENSMUSG00000034449, ENSMUSG00000024066, ENSMUSG00000020000,…	0.0134085	0.0134085
GOTERM_CC_FAT	GO:0005739~mitochondrion	94	14.2424	1.57308e-05	ENSMUSG00000025968, ENSMUSG00000022706, ENSMUSG00000022452, ENSMUSG00000036833, ENSMUSG00000058076, ENSMUSG00000031485, ENSMUSG00000031641, ENSMUSG00000038286, ENSMUSG00000064345, ENSMUSG00000006057, ENSMUSG00000021622, ENSMUSG00000030945, ENSMUSG00000028443, ENSMUSG00000024012, ENSMUSG00000021967, ENSMUSG00000000384, ENSMUSG00000021868, ENSMUSG00000028601, ENSMUSG00000035202, ENSMUSG00000030088,…	0.00522469	0.00261577
GOTERM_CC_FAT	GO:0044429~mitochondrial part	47	7.12121	3.87215e-05	ENSMUSG00000029198, ENSMUSG00000022706, ENSMUSG00000025968, ENSMUSG00000021607, ENSMUSG00000025260, ENSMUSG00000005299, ENSMUSG00000058076, ENSMUSG00000029153, ENSMUSG00000031641, ENSMUSG00000029455, ENSMUSG00000064345, ENSMUSG00000021622, ENSMUSG00000006057, ENSMUSG00000030945, ENSMUSG00000024900, ENSMUSG00000064367, ENSMUSG00000026170, ENSMUSG00000024012, ENSMUSG00000021967, ENSMUSG00000028622,…	0.0128117	0.00428895
GOTERM_CC_FAT	GO:0005743~mitochondrial inner membrane	27	4.09091	0.00141823	ENSMUSG00000025968, ENSMUSG00000005299, ENSMUSG00000025260, ENSMUSG00000058076, ENSMUSG00000029153, ENSMUSG00000064345, ENSMUSG00000006057, ENSMUSG00000021622, ENSMUSG00000024900, ENSMUSG00000064367, ENSMUSG00000026170, ENSMUSG00000024012, ENSMUSG00000054545, ENSMUSG00000027809, ENSMUSG00000024038, ENSMUSG00000024132, ENSMUSG00000032047, ENSMUSG00000003809, ENSMUSG00000015112, ENSMUSG00000025745,…	0.376624	0.111439
GOTERM_CC_FAT	GO:0019866~organelle inner membrane	28	4.24242	0.00151091	ENSMUSG00000025968, ENSMUSG00000005299, ENSMUSG00000025260, ENSMUSG00000058076, ENSMUSG00000029153, ENSMUSG00000064345, ENSMUSG00000006057, ENSMUSG00000021622, ENSMUSG00000024900, ENSMUSG00000026170, ENSMUSG00000064367, ENSMUSG00000024012, ENSMUSG00000054545, ENSMUSG00000027809, ENSMUSG00000024038, ENSMUSG00000024132, ENSMUSG00000032047, ENSMUSG00000003809, ENSMUSG00000015112, ENSMUSG00000025745,…	0.395596	0.095798
GOTERM_BP_FAT	GO:0009719~response to endogenous stimulus	16	2.42424	0.00313253	ENSMUSG00000020091, ENSMUSG00000022951, ENSMUSG00000026944, ENSMUSG00000059201, ENSMUSG00000005534, ENSMUSG00000022868, ENSMUSG00000027875, ENSMUSG00000032440, ENSMUSG00000025408, ENSMUSG00000047139, ENSMUSG00000005413, ENSMUSG00000000948, ENSMUSG00000054545, ENSMUSG00000026826, ENSMUSG00000042903, ENSMUSG00000024143	0.998141	0.956878
GOTERM_BP_FAT	GO:0008610~lipid biosynthetic process	23	3.48485	0.00349395	ENSMUSG00000022617, ENSMUSG00000023456, ENSMUSG00000021608, ENSMUSG00000074064, ENSMUSG00000043162, ENSMUSG00000040451, ENSMUSG00000031708, ENSMUSG00000021703, ENSMUSG00000026269, ENSMUSG00000031641, ENSMUSG00000025153, ENSMUSG00000019877, ENSMUSG00000035845, ENSMUSG00000020917, ENSMUSG00000029311, ENSMUSG00000027875, ENSMUSG00000022244, ENSMUSG00000021665, ENSMUSG00000034926, ENSMUSG00000021273,…	0.999101	0.903484
GOTERM_CC_FAT	GO:0005840~ribosome	17	2.57576	0.00403311	ENSMUSG00000022706, ENSMUSG00000021607, ENSMUSG00000032399, ENSMUSG00000052962, ENSMUSG00000038274, ENSMUSG00000029486, ENSMUSG00000041841, ENSMUSG00000060938, ENSMUSG00000005102, ENSMUSG00000021967, ENSMUSG00000028622, ENSMUSG00000014551, ENSMUSG00000057863, ENSMUSG00000030045, ENSMUSG00000039209, ENSMUSG00000053740, ENSMUSG00000057113	0.739653	0.200917
GOTERM_CC_FAT	GO:0042470~melanosome	12	1.81818	0.00435891	ENSMUSG00000021939, ENSMUSG00000028691, ENSMUSG00000029430, ENSMUSG00000027879, ENSMUSG00000029616, ENSMUSG00000030062, ENSMUSG00000030894, ENSMUSG00000025153, ENSMUSG00000001847, ENSMUSG00000058799, ENSMUSG00000010095, ENSMUSG00000022285	0.766527	0.187641
GOTERM_CC_FAT	GO:0048770~pigment granule	12	1.81818	0.00435891	ENSMUSG00000021939, ENSMUSG00000028691, ENSMUSG00000029430, ENSMUSG00000027879, ENSMUSG00000029616, ENSMUSG00000030062, ENSMUSG00000030894, ENSMUSG00000025153, ENSMUSG00000001847, ENSMUSG00000058799, ENSMUSG00000010095, ENSMUSG00000022285	0.766527	0.187641
GOTERM_BP_FAT	GO:0051147~regulation of muscle cell differentiation	6	0.909091	0.00495439	ENSMUSG00000036478, ENSMUSG00000020427, ENSMUSG00000022951, ENSMUSG00000020542, ENSMUSG00000041936, ENSMUSG00000042903	0.999952	0.91695
GOTERM_BP_FAT	GO:0006984~ER-nuclear signaling pathway	6	0.909091	0.00606168	ENSMUSG00000029467, ENSMUSG00000025408, ENSMUSG00000054455, ENSMUSG00000005102, ENSMUSG00000015839, ENSMUSG00000078622	0.999995	0.91257
GOTERM_CC_FAT	GO:0000323~lytic vacuole	18	2.72727	0.00637686	ENSMUSG00000058446, ENSMUSG00000033540, ENSMUSG00000036833, ENSMUSG00000034707, ENSMUSG00000028048, ENSMUSG00000029426, ENSMUSG00000028699, ENSMUSG00000026944, ENSMUSG00000035847, ENSMUSG00000021242, ENSMUSG00000025351, ENSMUSG00000022500, ENSMUSG00000021939, ENSMUSG00000021665, ENSMUSG00000079557, ENSMUSG00000026958, ENSMUSG00000030894, ENSMUSG00000031838	0.881198	0.233781
GOTERM_CC_FAT	GO:0005764~lysosome	18	2.72727	0.00637686	ENSMUSG00000058446, ENSMUSG00000033540, ENSMUSG00000036833, ENSMUSG00000034707, ENSMUSG00000028048, ENSMUSG00000029426, ENSMUSG00000028699, ENSMUSG00000026944, ENSMUSG00000035847, ENSMUSG00000021242, ENSMUSG00000025351, ENSMUSG00000022500, ENSMUSG00000021939, ENSMUSG00000021665, ENSMUSG00000079557, ENSMUSG00000026958, ENSMUSG00000030894, ENSMUSG00000031838	0.881198	0.233781
GOTERM_CC_FAT	GO:0005792~microsome	15	2.27273	0.00686008	ENSMUSG00000029467, ENSMUSG00000032114, ENSMUSG00000045103, ENSMUSG00000005514, ENSMUSG00000036833, ENSMUSG00000038489, ENSMUSG00000026692, ENSMUSG00000028700, ENSMUSG00000034785, ENSMUSG00000078622, ENSMUSG00000024900, ENSMUSG00000005413, ENSMUSG00000054545, ENSMUSG00000003484, ENSMUSG00000052914	0.898964	0.224849
GOTERM_BP_FAT	GO:0034976~response to endoplasmic reticulum stress	6	0.909091	0.00733206	ENSMUSG00000025408, ENSMUSG00000054455, ENSMUSG00000005102, ENSMUSG00000040462, ENSMUSG00000015839, ENSMUSG00000078622	1	0.914388
GOTERM_BP_FAT	GO:0035166~post-embryonic hemopoiesis	3	0.454545	0.00801595	ENSMUSG00000032114, ENSMUSG00000032220, ENSMUSG00000003549	1	0.900151
GOTERM_BP_FAT	GO:0009725~response to hormone stimulus	14	2.12121	0.00900612	ENSMUSG00000020091, ENSMUSG00000022951, ENSMUSG00000026944, ENSMUSG00000059201, ENSMUSG00000005534, ENSMUSG00000022868, ENSMUSG00000027875, ENSMUSG00000032440, ENSMUSG00000047139, ENSMUSG00000005413, ENSMUSG00000000948, ENSMUSG00000054545, ENSMUSG00000042903, ENSMUSG00000024143	1	0.8963
GOTERM_CC_FAT	GO:0042598~vesicular fraction	15	2.27273	0.00980591	ENSMUSG00000029467, ENSMUSG00000032114, ENSMUSG00000045103, ENSMUSG00000005514, ENSMUSG00000036833, ENSMUSG00000038489, ENSMUSG00000026692, ENSMUSG00000028700, ENSMUSG00000034785, ENSMUSG00000078622, ENSMUSG00000024900, ENSMUSG00000005413, ENSMUSG00000054545, ENSMUSG00000003484, ENSMUSG00000052914	0.962428	0.279744
GOTERM_CC_FAT	GO:0000313~organellar ribosome	7	1.06061	0.0112838	ENSMUSG00000029486, ENSMUSG00000022706, ENSMUSG00000021607, ENSMUSG00000021967, ENSMUSG00000028622, ENSMUSG00000014551, ENSMUSG00000030045	0.977151	0.29074
GOTERM_CC_FAT	GO:0005761~mitochondrial ribosome	7	1.06061	0.0112838	ENSMUSG00000029486, ENSMUSG00000022706, ENSMUSG00000021607, ENSMUSG00000021967, ENSMUSG00000028622, ENSMUSG00000014551, ENSMUSG00000030045	0.977151	0.29074
GOTERM_BP_FAT	GO:0006631~fatty acid metabolic process	16	2.42424	0.0117472	ENSMUSG00000074604, ENSMUSG00000023456, ENSMUSG00000074064, ENSMUSG00000038489, ENSMUSG00000030861, ENSMUSG00000025745, ENSMUSG00000026269, ENSMUSG00000031641, ENSMUSG00000025153, ENSMUSG00000030945, ENSMUSG00000024900, ENSMUSG00000031604, ENSMUSG00000030935, ENSMUSG00000028601, ENSMUSG00000030972, ENSMUSG00000024132	1	0.928007
GOTERM_BP_FAT	GO:0009991~response to extracellular stimulus	12	1.81818	0.012749	ENSMUSG00000027875, ENSMUSG00000025408, ENSMUSG00000032114, ENSMUSG00000032440, ENSMUSG00000005413, ENSMUSG00000063229, ENSMUSG00000005102, ENSMUSG00000054545, ENSMUSG00000026826, ENSMUSG00000020542, ENSMUSG00000059201, ENSMUSG00000020973	1	0.923566
GOTERM_CC_FAT	GO:0030529~ribonucleoprotein complex	32	4.84848	0.0137115	ENSMUSG00000022706, ENSMUSG00000032399, ENSMUSG00000018199, ENSMUSG00000021607, ENSMUSG00000056851, ENSMUSG00000032621, ENSMUSG00000057278, ENSMUSG00000052962, ENSMUSG00000026127, ENSMUSG00000041841, ENSMUSG00000060938, ENSMUSG00000057130, ENSMUSG00000000948, ENSMUSG00000021967, ENSMUSG00000028622, ENSMUSG00000014551, ENSMUSG00000030045, ENSMUSG00000025982, ENSMUSG00000057113, ENSMUSG00000060739,…	0.989923	0.318273
GOTERM_CC_FAT	GO:0005783~endoplasmic reticulum	53	8.0303	0.0137232	ENSMUSG00000005514, ENSMUSG00000040236, ENSMUSG00000036833, ENSMUSG00000029616, ENSMUSG00000019877, ENSMUSG00000031483, ENSMUSG00000052428, ENSMUSG00000054766, ENSMUSG00000021928, ENSMUSG00000030082, ENSMUSG00000035376, ENSMUSG00000030062, ENSMUSG00000030682, ENSMUSG00000022435, ENSMUSG00000031604, ENSMUSG00000079037, ENSMUSG00000029467, ENSMUSG00000031708, ENSMUSG00000025935, ENSMUSG00000032437,…	0.989963	0.298096
GOTERM_BP_FAT	GO:0016125~sterol metabolic process	9	1.36364	0.0140823	ENSMUSG00000021928, ENSMUSG00000027875, ENSMUSG00000034926, ENSMUSG00000021273, ENSMUSG00000031604, ENSMUSG00000032081, ENSMUSG00000026944, ENSMUSG00000059201, ENSMUSG00000049313	1	0.924512
GOTERM_BP_FAT	GO:0008202~steroid metabolic process	13	1.9697	0.0188108	ENSMUSG00000032114, ENSMUSG00000031708, ENSMUSG00000059201, ENSMUSG00000026944, ENSMUSG00000049313, ENSMUSG00000029311, ENSMUSG00000021928, ENSMUSG00000027875, ENSMUSG00000022244, ENSMUSG00000034926, ENSMUSG00000021273, ENSMUSG00000031604, ENSMUSG00000032081	1	0.958052
GOTERM_BP_FAT	GO:0042592~homeostatic process	34	5.15152	0.0190497	ENSMUSG00000056216, ENSMUSG00000025968, ENSMUSG00000031762, ENSMUSG00000033540, ENSMUSG00000032114, ENSMUSG00000028691, ENSMUSG00000035451, ENSMUSG00000022229, ENSMUSG00000021703, ENSMUSG00000001847, ENSMUSG00000026944, ENSMUSG00000078622, ENSMUSG00000021242, ENSMUSG00000058709, ENSMUSG00000025408, ENSMUSG00000047139, ENSMUSG00000021665, ENSMUSG00000038290, ENSMUSG00000040612, ENSMUSG00000022435,…	1	0.948435
GOTERM_BP_FAT	GO:0006006~glucose metabolic process	12	1.81818	0.0193182	ENSMUSG00000023456, ENSMUSG00000024900, ENSMUSG00000014956, ENSMUSG00000048583, ENSMUSG00000032114, ENSMUSG00000022490, ENSMUSG00000023019, ENSMUSG00000063229, ENSMUSG00000021756, ENSMUSG00000040618, ENSMUSG00000059201, ENSMUSG00000019577	1	0.938721
GOTERM_BP_FAT	GO:0019318~hexose metabolic process	14	2.12121	0.0203352	ENSMUSG00000025648, ENSMUSG00000023456, ENSMUSG00000032114, ENSMUSG00000048583, ENSMUSG00000022490, ENSMUSG00000063229, ENSMUSG00000021756, ENSMUSG00000059201, ENSMUSG00000019577, ENSMUSG00000024900, ENSMUSG00000014956, ENSMUSG00000023019, ENSMUSG00000040618, ENSMUSG00000037306	1	0.935738
GOTERM_BP_FAT	GO:0001816~cytokine production	6	0.909091	0.0216797	ENSMUSG00000032114, ENSMUSG00000056529, ENSMUSG00000055435, ENSMUSG00000025498, ENSMUSG00000003847, ENSMUSG00000027544	1	0.935768
GOTERM_BP_FAT	GO:0006979~response to oxidative stress	9	1.36364	0.0218882	ENSMUSG00000038393, ENSMUSG00000018585, ENSMUSG00000079037, ENSMUSG00000025408, ENSMUSG00000009292, ENSMUSG00000028691, ENSMUSG00000005413, ENSMUSG00000034926, ENSMUSG00000027809	1	0.926384
GOTERM_CC_FAT	GO:0005773~vacuole	18	2.72727	0.0221675	ENSMUSG00000058446, ENSMUSG00000033540, ENSMUSG00000036833, ENSMUSG00000034707, ENSMUSG00000028048, ENSMUSG00000029426, ENSMUSG00000028699, ENSMUSG00000026944, ENSMUSG00000035847, ENSMUSG00000021242, ENSMUSG00000025351, ENSMUSG00000022500, ENSMUSG00000021939, ENSMUSG00000021665, ENSMUSG00000079557, ENSMUSG00000026958, ENSMUSG00000030894, ENSMUSG00000031838	0.999427	0.413277
GOTERM_CC_FAT	GO:0031966~mitochondrial membrane	27	4.09091	0.0222008	ENSMUSG00000025968, ENSMUSG00000005299, ENSMUSG00000025260, ENSMUSG00000058076, ENSMUSG00000029153, ENSMUSG00000064345, ENSMUSG00000006057, ENSMUSG00000021622, ENSMUSG00000024900, ENSMUSG00000064367, ENSMUSG00000026170, ENSMUSG00000024012, ENSMUSG00000054545, ENSMUSG00000027809, ENSMUSG00000024038, ENSMUSG00000024132, ENSMUSG00000032047, ENSMUSG00000003809, ENSMUSG00000015112, ENSMUSG00000025745,…	0.999434	0.392505
GOTERM_BP_FAT	GO:0006333~chromatin assembly or disassembly	8	1.21212	0.0223149	ENSMUSG00000002748, ENSMUSG00000022421, ENSMUSG00000056216, ENSMUSG00000058799, ENSMUSG00000031715, ENSMUSG00000023852, ENSMUSG00000019857, ENSMUSG00000054766	1	0.918937
GOTERM_BP_FAT	GO:0005996~monosaccharide metabolic process	15	2.27273	0.0239021	ENSMUSG00000025648, ENSMUSG00000023456, ENSMUSG00000032114, ENSMUSG00000048583, ENSMUSG00000022490, ENSMUSG00000063229, ENSMUSG00000021756, ENSMUSG00000059201, ENSMUSG00000019577, ENSMUSG00000024900, ENSMUSG00000014956, ENSMUSG00000023019, ENSMUSG00000040618, ENSMUSG00000054545, ENSMUSG00000037306	1	0.922048
GOTERM_CC_FAT	GO:0070013~intracellular organelle lumen	70	10.6061	0.0245702	ENSMUSG00000022706, ENSMUSG00000028248, ENSMUSG00000029616, ENSMUSG00000031641, ENSMUSG00000041057, ENSMUSG00000006056, ENSMUSG00000026127, ENSMUSG00000054766, ENSMUSG00000030945, ENSMUSG00000066306, ENSMUSG00000021967, ENSMUSG00000038290, ENSMUSG00000001016, ENSMUSG00000052293, ENSMUSG00000021868, ENSMUSG00000035202, ENSMUSG00000057113, ENSMUSG00000060739, ENSMUSG00000042133, ENSMUSG00000048100,…	0.999747	0.404143
GOTERM_BP_FAT	GO:0006412~translation	20	3.0303	0.0249434	ENSMUSG00000032399, ENSMUSG00000021607, ENSMUSG00000029173, ENSMUSG00000028085, ENSMUSG00000003808, ENSMUSG00000045983, ENSMUSG00000038274, ENSMUSG00000031029, ENSMUSG00000029486, ENSMUSG00000042426, ENSMUSG00000041841, ENSMUSG00000060938, ENSMUSG00000005102, ENSMUSG00000021967, ENSMUSG00000057863, ENSMUSG00000030045, ENSMUSG00000026083, ENSMUSG00000035202, ENSMUSG00000039209, ENSMUSG00000053740	1	0.920423
GOTERM_CC_FAT	GO:0043233~organelle lumen	70	10.6061	0.0256696	ENSMUSG00000022706, ENSMUSG00000028248, ENSMUSG00000029616, ENSMUSG00000031641, ENSMUSG00000041057, ENSMUSG00000006056, ENSMUSG00000026127, ENSMUSG00000054766, ENSMUSG00000030945, ENSMUSG00000066306, ENSMUSG00000021967, ENSMUSG00000038290, ENSMUSG00000001016, ENSMUSG00000052293, ENSMUSG00000021868, ENSMUSG00000035202, ENSMUSG00000057113, ENSMUSG00000060739, ENSMUSG00000042133, ENSMUSG00000048100,…	0.999827	0.399137
GOTERM_BP_FAT	GO:0048742~regulation of skeletal muscle fiber development	4	0.606061	0.0279686	ENSMUSG00000036478, ENSMUSG00000020427, ENSMUSG00000020542, ENSMUSG00000041936	1	0.933266
GOTERM_CC_FAT	GO:0031974~membrane-enclosed lumen	71	10.7576	0.0337425	ENSMUSG00000022706, ENSMUSG00000025968, ENSMUSG00000028248, ENSMUSG00000029616, ENSMUSG00000031641, ENSMUSG00000041057, ENSMUSG00000006056, ENSMUSG00000026127, ENSMUSG00000054766, ENSMUSG00000030945, ENSMUSG00000066306, ENSMUSG00000021967, ENSMUSG00000038290, ENSMUSG00000001016, ENSMUSG00000052293, ENSMUSG00000021868, ENSMUSG00000035202, ENSMUSG00000057113, ENSMUSG00000060739, ENSMUSG00000042133,…	0.999989	0.470071
GOTERM_BP_FAT	GO:0022900~electron transport chain	11	1.66667	0.0351322	ENSMUSG00000025968, ENSMUSG00000037152, ENSMUSG00000064367, ENSMUSG00000037190, ENSMUSG00000058076, ENSMUSG00000015112, ENSMUSG00000027809, ENSMUSG00000063694, ENSMUSG00000027015, ENSMUSG00000064345, ENSMUSG00000024038	1	0.961527
GOTERM_BP_FAT	GO:0006091~generation of precursor metabolites and energy	19	2.87879	0.0358985	ENSMUSG00000023456, ENSMUSG00000025968, ENSMUSG00000037190, ENSMUSG00000032114, ENSMUSG00000022490, ENSMUSG00000063229, ENSMUSG00000058076, ENSMUSG00000021756, ENSMUSG00000015112, ENSMUSG00000063694, ENSMUSG00000027015, ENSMUSG00000016252, ENSMUSG00000064345, ENSMUSG00000006057, ENSMUSG00000037152, ENSMUSG00000014956, ENSMUSG00000064367, ENSMUSG00000027809, ENSMUSG00000024038	1	0.958637
GOTERM_BP_FAT	GO:0006085~acetyl-CoA biosynthetic process	3	0.454545	0.0360552	ENSMUSG00000074064, ENSMUSG00000019577, ENSMUSG00000020917	1	0.953403
GOTERM_CC_FAT	GO:0005625~soluble fraction	10	1.51515	0.0369648	ENSMUSG00000021939, ENSMUSG00000005514, ENSMUSG00000023019, ENSMUSG00000039062, ENSMUSG00000020451, ENSMUSG00000030894, ENSMUSG00000026348, ENSMUSG00000004951, ENSMUSG00000063694, ENSMUSG00000027227	0.999996	0.483218
GOTERM_CC_FAT	GO:0016607~nuclear speck	10	1.51515	0.0395887	ENSMUSG00000010608, ENSMUSG00000042133, ENSMUSG00000028248, ENSMUSG00000018379, ENSMUSG00000032239, ENSMUSG00000038374, ENSMUSG00000020542, ENSMUSG00000048310, ENSMUSG00000057113, ENSMUSG00000061136	0.999999	0.489597
GOTERM_CC_FAT	GO:0000267~cell fraction	36	5.45455	0.0409977	ENSMUSG00000032114, ENSMUSG00000005514, ENSMUSG00000054455, ENSMUSG00000036833, ENSMUSG00000026692, ENSMUSG00000038489, ENSMUSG00000020451, ENSMUSG00000028700, ENSMUSG00000001847, ENSMUSG00000034101, ENSMUSG00000034785, ENSMUSG00000078622, ENSMUSG00000024900, ENSMUSG00000047139, ENSMUSG00000020102, ENSMUSG00000026223, ENSMUSG00000054545, ENSMUSG00000026348, ENSMUSG00000035891, ENSMUSG00000029467,…	0.999999	0.485113
GOTERM_CC_FAT	GO:0005740~mitochondrial envelope	27	4.09091	0.0442282	ENSMUSG00000025968, ENSMUSG00000005299, ENSMUSG00000025260, ENSMUSG00000058076, ENSMUSG00000029153, ENSMUSG00000064345, ENSMUSG00000006057, ENSMUSG00000021622, ENSMUSG00000024900, ENSMUSG00000064367, ENSMUSG00000026170, ENSMUSG00000024012, ENSMUSG00000054545, ENSMUSG00000027809, ENSMUSG00000024038, ENSMUSG00000024132, ENSMUSG00000032047, ENSMUSG00000003809, ENSMUSG00000015112, ENSMUSG00000025745,…	1	0.495763
GOTERM_BP_FAT	GO:0008654~phospholipid biosynthetic process	9	1.36364	0.0457793	ENSMUSG00000022617, ENSMUSG00000021608, ENSMUSG00000043162, ENSMUSG00000021665, ENSMUSG00000040451, ENSMUSG00000030682, ENSMUSG00000021703, ENSMUSG00000019877, ENSMUSG00000035845	1	0.97663
GOTERM_BP_FAT	GO:0060249~anatomical structure homeostasis	8	1.21212	0.0467292	ENSMUSG00000040554, ENSMUSG00000045103, ENSMUSG00000038290, ENSMUSG00000026648, ENSMUSG00000040612, ENSMUSG00000030894, ENSMUSG00000001847, ENSMUSG00000024066	1	0.974993
GOTERM_BP_FAT	GO:0030968~endoplasmic reticulum unfolded protein response	4	0.606061	0.0487445	ENSMUSG00000025408, ENSMUSG00000054455, ENSMUSG00000005102, ENSMUSG00000015839	1	0.9755
GOTERM_BP_FAT	GO:0048641~regulation of skeletal muscle tissue development	4	0.606061	0.0487445	ENSMUSG00000036478, ENSMUSG00000020427, ENSMUSG00000020542, ENSMUSG00000041936	1	0.9755
GOTERM_BP_FAT	GO:0034620~cellular response to unfolded protein	4	0.606061	0.0487445	ENSMUSG00000025408, ENSMUSG00000054455, ENSMUSG00000005102, ENSMUSG00000015839	1	0.9755
GOTERM_BP_FAT	GO:0006694~steroid biosynthetic process	7	1.06061	0.0543026	ENSMUSG00000027875, ENSMUSG00000022244, ENSMUSG00000031708, ENSMUSG00000034926, ENSMUSG00000021273, ENSMUSG00000031604, ENSMUSG00000029311	1	0.981611
GOTERM_BP_FAT	GO:0010033~response to organic substance	24	3.63636	0.0605703	ENSMUSG00000020091, ENSMUSG00000032114, ENSMUSG00000056529, ENSMUSG00000054455, ENSMUSG00000049130, ENSMUSG00000022136, ENSMUSG00000022951, ENSMUSG00000026944, ENSMUSG00000059201, ENSMUSG00000005534, ENSMUSG00000022868, ENSMUSG00000027875, ENSMUSG00000025408, ENSMUSG00000032440, ENSMUSG00000047139, ENSMUSG00000005413, ENSMUSG00000000948, ENSMUSG00000005102, ENSMUSG00000015839, ENSMUSG00000054545,…	1	0.98667
GOTERM_BP_FAT	GO:0045661~regulation of myoblast differentiation	3	0.454545	0.0627701	ENSMUSG00000036478, ENSMUSG00000020427, ENSMUSG00000020542	1	0.986838
GOTERM_BP_FAT	GO:0007584~response to nutrient	7	1.06061	0.063183	ENSMUSG00000027875, ENSMUSG00000025408, ENSMUSG00000032114, ENSMUSG00000032440, ENSMUSG00000005413, ENSMUSG00000054545, ENSMUSG00000020973	1	0.98529
GOTERM_BP_FAT	GO:0051153~regulation of striated muscle cell differentiation	4	0.606061	0.0657621	ENSMUSG00000036478, ENSMUSG00000020427, ENSMUSG00000020542, ENSMUSG00000041936	1	0.985878
GOTERM_BP_FAT	GO:0008203~cholesterol metabolic process	7	1.06061	0.0679255	ENSMUSG00000027875, ENSMUSG00000034926, ENSMUSG00000021273, ENSMUSG00000032081, ENSMUSG00000026944, ENSMUSG00000059201, ENSMUSG00000049313	1	0.986042
GOTERM_BP_FAT	GO:0010035~response to inorganic substance	8	1.21212	0.0699567	ENSMUSG00000031762, ENSMUSG00000079037, ENSMUSG00000025408, ENSMUSG00000028691, ENSMUSG00000015112, ENSMUSG00000026826, ENSMUSG00000027015, ENSMUSG00000024066	1	0.986083
GOTERM_BP_FAT	GO:0015980~energy derivation by oxidation of organic compounds	9	1.36364	0.0700309	ENSMUSG00000025968, ENSMUSG00000064367, ENSMUSG00000014956, ENSMUSG00000032114, ENSMUSG00000022490, ENSMUSG00000058076, ENSMUSG00000021756, ENSMUSG00000015112, ENSMUSG00000064345	1	0.984347
GOTERM_BP_FAT	GO:0031667~response to nutrient levels	9	1.36364	0.0700309	ENSMUSG00000027875, ENSMUSG00000025408, ENSMUSG00000032114, ENSMUSG00000032440, ENSMUSG00000005413, ENSMUSG00000005102, ENSMUSG00000054545, ENSMUSG00000059201, ENSMUSG00000020973	1	0.984347
GOTERM_BP_FAT	GO:0048545~response to steroid hormone stimulus	6	0.909091	0.0738362	ENSMUSG00000032440, ENSMUSG00000047139, ENSMUSG00000005413, ENSMUSG00000054545, ENSMUSG00000022951, ENSMUSG00000026944	1	0.986016
GOTERM_CC_FAT	GO:0031090~organelle membrane	49	7.42424	0.0814111	ENSMUSG00000025968, ENSMUSG00000036833, ENSMUSG00000058076, ENSMUSG00000028700, ENSMUSG00000041720, ENSMUSG00000019877, ENSMUSG00000031483, ENSMUSG00000064345, ENSMUSG00000026944, ENSMUSG00000021622, ENSMUSG00000006057, ENSMUSG00000024012, ENSMUSG00000030062, ENSMUSG00000032047, ENSMUSG00000032437, ENSMUSG00000015112, ENSMUSG00000025745, ENSMUSG00000035845, ENSMUSG00000019577, ENSMUSG00000025351,…	1	0.707545
GOTERM_BP_FAT	GO:0016042~lipid catabolic process	10	1.51515	0.0841348	ENSMUSG00000022244, ENSMUSG00000003131, ENSMUSG00000021665, ENSMUSG00000036833, ENSMUSG00000002847, ENSMUSG00000025745, ENSMUSG00000032081, ENSMUSG00000024132, ENSMUSG00000002992, ENSMUSG00000005447	1	0.991435
GOTERM_CC_FAT	GO:0045121~membrane raft	8	1.21212	0.0848104	ENSMUSG00000001525, ENSMUSG00000079037, ENSMUSG00000000058, ENSMUSG00000032440, ENSMUSG00000047139, ENSMUSG00000045103, ENSMUSG00000028599, ENSMUSG00000024143	1	0.707607
GOTERM_BP_FAT	GO:0006090~pyruvate metabolic process	4	0.606061	0.0851041	ENSMUSG00000023456, ENSMUSG00000023019, ENSMUSG00000040618, ENSMUSG00000019577	1	0.99082
GOTERM_CC_FAT	GO:0016604~nuclear body	12	1.81818	0.0862205	ENSMUSG00000010608, ENSMUSG00000061436, ENSMUSG00000042133, ENSMUSG00000028248, ENSMUSG00000018379, ENSMUSG00000032239, ENSMUSG00000038374, ENSMUSG00000020542, ENSMUSG00000048310, ENSMUSG00000006056, ENSMUSG00000057113, ENSMUSG00000061136	1	0.69911
GOTERM_CC_FAT	GO:0005801~cis-Golgi network	3	0.454545	0.0890542	ENSMUSG00000040236, ENSMUSG00000002546, ENSMUSG00000020451	1	0.697174
GOTERM_CC_FAT	GO:0032994~protein-lipid complex	4	0.606061	0.0899213	ENSMUSG00000040026, ENSMUSG00000032081, ENSMUSG00000049313, ENSMUSG00000002992	1	0.687171
GOTERM_CC_FAT	GO:0034358~plasma lipoprotein particle	4	0.606061	0.0899213	ENSMUSG00000040026, ENSMUSG00000032081, ENSMUSG00000049313, ENSMUSG00000002992	1	0.687171
GOTERM_BP_FAT	GO:0019637~organophosphate metabolic process	13	1.9697	0.0901475	ENSMUSG00000023456, ENSMUSG00000022617, ENSMUSG00000021608, ENSMUSG00000040451, ENSMUSG00000043162, ENSMUSG00000036833, ENSMUSG00000021703, ENSMUSG00000041720, ENSMUSG00000019877, ENSMUSG00000035845, ENSMUSG00000023019, ENSMUSG00000021665, ENSMUSG00000030682	1	0.992206
GOTERM_CC_FAT	GO:0042175~nuclear envelope-endoplasmic reticulum network	13	1.9697	0.0929468	ENSMUSG00000043162, ENSMUSG00000054455, ENSMUSG00000036833, ENSMUSG00000022136, ENSMUSG00000026692, ENSMUSG00000032437, ENSMUSG00000031483, ENSMUSG00000019877, ENSMUSG00000035845, ENSMUSG00000032239, ENSMUSG00000027879, ENSMUSG00000024120, ENSMUSG00000030062	1	0.686576
GOTERM_BP_FAT	GO:0006461~protein complex assembly	16	2.42424	0.0931355	ENSMUSG00000001525, ENSMUSG00000062591, ENSMUSG00000079426, ENSMUSG00000079037, ENSMUSG00000028899, ENSMUSG00000054428, ENSMUSG00000022100, ENSMUSG00000005534, ENSMUSG00000061809, ENSMUSG00000000058, ENSMUSG00000052293, ENSMUSG00000041936, ENSMUSG00000066232, ENSMUSG00000022607, ENSMUSG00000020973, ENSMUSG00000057113	1	0.992538
GOTERM_BP_FAT	GO:0070271~protein complex biogenesis	16	2.42424	0.0931355	ENSMUSG00000001525, ENSMUSG00000062591, ENSMUSG00000079426, ENSMUSG00000079037, ENSMUSG00000028899, ENSMUSG00000054428, ENSMUSG00000022100, ENSMUSG00000005534, ENSMUSG00000061809, ENSMUSG00000000058, ENSMUSG00000052293, ENSMUSG00000041936, ENSMUSG00000066232, ENSMUSG00000022607, ENSMUSG00000020973, ENSMUSG00000057113	1	0.992538
GOTERM_BP_FAT	GO:0048569~post-embryonic organ development	3	0.454545	0.0941488	ENSMUSG00000032114, ENSMUSG00000032220, ENSMUSG00000003549	1	0.992038
GOTERM_BP_FAT	GO:0043933~macromolecular complex subunit organization	21	3.18182	0.0941811	ENSMUSG00000056216, ENSMUSG00000001525, ENSMUSG00000062591, ENSMUSG00000079426, ENSMUSG00000079037, ENSMUSG00000028899, ENSMUSG00000054428, ENSMUSG00000022100, ENSMUSG00000005534, ENSMUSG00000019857, ENSMUSG00000054766, ENSMUSG00000022995, ENSMUSG00000061809, ENSMUSG00000000058, ENSMUSG00000052293, ENSMUSG00000058799, ENSMUSG00000041936, ENSMUSG00000066232, ENSMUSG00000022607, ENSMUSG00000020973,…	1	0.991082
GOTERM_BP_FAT	GO:0055092~sterol homeostasis	4	0.606061	0.0955779	ENSMUSG00000021242, ENSMUSG00000032114, ENSMUSG00000047139, ENSMUSG00000026944	1	0.990738
GOTERM_BP_FAT	GO:0042632~cholesterol homeostasis	4	0.606061	0.0955779	ENSMUSG00000021242, ENSMUSG00000032114, ENSMUSG00000047139, ENSMUSG00000026944	1	0.990738
GOTERM_BP_FAT	GO:0007040~lysosome organization	4	0.606061	0.0955779	ENSMUSG00000033540, ENSMUSG00000021665, ENSMUSG00000028048, ENSMUSG00000030894	1	0.990738
GOTERM_BP_FAT	GO:0007050~cell cycle arrest	6	0.909091	0.0995444	ENSMUSG00000028649, ENSMUSG00000028211, ENSMUSG00000025408, ENSMUSG00000032855, ENSMUSG00000027878, ENSMUSG00000042903	1	0.991567

## Sheet: KEGG_5
Category	Term	Count	%	PValue	Genes	Bonferroni	Benjamini
KEGG_PATHWAY	mmu00071:Fatty acid metabolism	8	1.21212	0.00397834	ENSMUSG00000024900, ENSMUSG00000003809, ENSMUSG00000030861, ENSMUSG00000038489, ENSMUSG00000025745, ENSMUSG00000029455, ENSMUSG00000024132, ENSMUSG00000032047	0.452245	0.452245
KEGG_PATHWAY	mmu00650:Butanoate metabolism	7	1.06061	0.00699214	ENSMUSG00000030945, ENSMUSG00000027875, ENSMUSG00000025745, ENSMUSG00000029455, ENSMUSG00000030935, ENSMUSG00000030972, ENSMUSG00000032047	0.653378	0.411254
KEGG_PATHWAY	mmu00640:Propanoate metabolism	6	0.909091	0.0212341	ENSMUSG00000074064, ENSMUSG00000033429, ENSMUSG00000063229, ENSMUSG00000025745, ENSMUSG00000029455, ENSMUSG00000032047	0.96087	0.660504
KEGG_PATHWAY	mmu00983:Drug metabolism	6	0.909091	0.0212341	ENSMUSG00000033427, ENSMUSG00000062867, ENSMUSG00000054545, ENSMUSG00000026839, ENSMUSG00000024066, ENSMUSG00000027823	0.96087	0.660504
KEGG_PATHWAY	mmu00280:Valine, leucine and isoleucine degradation	7	1.06061	0.0399121	ENSMUSG00000027875, ENSMUSG00000025260, ENSMUSG00000033429, ENSMUSG00000030861, ENSMUSG00000025745, ENSMUSG00000029455, ENSMUSG00000032047	0.997867	0.785098
KEGG_PATHWAY	mmu00240:Pyrimidine metabolism	11	1.66667	0.040888	ENSMUSG00000033427, ENSMUSG00000071662, ENSMUSG00000028443, ENSMUSG00000038489, ENSMUSG00000028633, ENSMUSG00000026839, ENSMUSG00000021236, ENSMUSG00000031562, ENSMUSG00000024782, ENSMUSG00000028719, ENSMUSG00000039771	0.998171	0.716565
KEGG_PATHWAY	mmu00982:Drug metabolism	5	0.757576	0.0874369	ENSMUSG00000074604, ENSMUSG00000004035, ENSMUSG00000026692, ENSMUSG00000054545, ENSMUSG00000004032	0.999999	0.900011
KEGG_PATHWAY	mmu03010:Ribosome	7	1.06061	0.0924028	ENSMUSG00000032399, ENSMUSG00000041841, ENSMUSG00000060938, ENSMUSG00000057863, ENSMUSG00000039209, ENSMUSG00000053740, ENSMUSG00000038274	1	0.876492
KEGG_PATHWAY	mmu00531:Glycosaminoglycan degradation	4	0.606061	0.0966615	ENSMUSG00000033540, ENSMUSG00000021665, ENSMUSG00000034707, ENSMUSG00000035847	1	0.853216

## Sheet: FC_10
Category	Term	Count	%	PValue	Genes	Bonferroni	Benjamini
SP_PIR_KEYWORDS	acetylation	63	23.5075	0.000354678	ENSMUSG00000022800, ENSMUSG00000032399, ENSMUSG00000005514, ENSMUSG00000069835, ENSMUSG00000038286, ENSMUSG00000009292, ENSMUSG00000032407, ENSMUSG00000028443, ENSMUSG00000030062, ENSMUSG00000032047, ENSMUSG00000027185, ENSMUSG00000025153, ENSMUSG00000026788, ENSMUSG00000045983, ENSMUSG00000027875, ENSMUSG00000027879, ENSMUSG00000028633, ENSMUSG00000024120, ENSMUSG00000004951, ENSMUSG00000024782,…	0.0996784	0.0996784
SP_PIR_KEYWORDS	oxidoreductase	20	7.46269	0.00059411	ENSMUSG00000020000, ENSMUSG00000075705, ENSMUSG00000028691, ENSMUSG00000005514, ENSMUSG00000063229, ENSMUSG00000030861, ENSMUSG00000031641, ENSMUSG00000025153, ENSMUSG00000029455, ENSMUSG00000028378, ENSMUSG00000034785, ENSMUSG00000029311, ENSMUSG00000042096, ENSMUSG00000026170, ENSMUSG00000023094, ENSMUSG00000005413, ENSMUSG00000021273, ENSMUSG00000031604, ENSMUSG00000027227, ENSMUSG00000052914	0.161306	0.0841974
SP_PIR_KEYWORDS	Acyltransferase	10	3.73134	0.000866053	ENSMUSG00000002797, ENSMUSG00000024900, ENSMUSG00000025220, ENSMUSG00000069835, ENSMUSG00000027185, ENSMUSG00000025153, ENSMUSG00000024973, ENSMUSG00000026643, ENSMUSG00000063683, ENSMUSG00000032047	0.226216	0.0819355
SP_PIR_KEYWORDS	mitochondrion	27	10.0746	0.00140406	ENSMUSG00000029198, ENSMUSG00000058076, ENSMUSG00000031641, ENSMUSG00000029455, ENSMUSG00000052962, ENSMUSG00000063683, ENSMUSG00000024900, ENSMUSG00000026170, ENSMUSG00000022244, ENSMUSG00000040618, ENSMUSG00000021967, ENSMUSG00000028601, ENSMUSG00000024132, ENSMUSG00000032047, ENSMUSG00000043162, ENSMUSG00000030861, ENSMUSG00000035948, ENSMUSG00000063694, ENSMUSG00000016252, ENSMUSG00000027875,…	0.34025	0.0987507
SP_PIR_KEYWORDS	lipid synthesis	7	2.61194	0.00404007	ENSMUSG00000027875, ENSMUSG00000021273, ENSMUSG00000031641, ENSMUSG00000031604, ENSMUSG00000025153, ENSMUSG00000020917, ENSMUSG00000029311	0.698288	0.213102
SP_PIR_KEYWORDS	fatty acid metabolism	6	2.23881	0.00457728	ENSMUSG00000024900, ENSMUSG00000030861, ENSMUSG00000030935, ENSMUSG00000028601, ENSMUSG00000030972, ENSMUSG00000024132	0.742821	0.202546
SP_PIR_KEYWORDS	lipid metabolism	8	2.98507	0.00484396	ENSMUSG00000024900, ENSMUSG00000030861, ENSMUSG00000028048, ENSMUSG00000030935, ENSMUSG00000028601, ENSMUSG00000030972, ENSMUSG00000024132, ENSMUSG00000049313	0.762431	0.18562
SP_PIR_KEYWORDS	nadp	8	2.98507	0.00626433	ENSMUSG00000026170, ENSMUSG00000005514, ENSMUSG00000021273, ENSMUSG00000030905, ENSMUSG00000031641, ENSMUSG00000025153, ENSMUSG00000028378, ENSMUSG00000029311	0.844339	0.207457
SP_PIR_KEYWORDS	protease inhibitor	5	1.86567	0.00701716	ENSMUSG00000047104, ENSMUSG00000027447, ENSMUSG00000030111, ENSMUSG00000021081, ENSMUSG00000021585	0.875619	0.206737
SP_PIR_KEYWORDS	transit peptide	17	6.34328	0.00980921	ENSMUSG00000029198, ENSMUSG00000043162, ENSMUSG00000030861, ENSMUSG00000058076, ENSMUSG00000029455, ENSMUSG00000035948, ENSMUSG00000052962, ENSMUSG00000026170, ENSMUSG00000027875, ENSMUSG00000023094, ENSMUSG00000040618, ENSMUSG00000024120, ENSMUSG00000030935, ENSMUSG00000028601, ENSMUSG00000030972, ENSMUSG00000024132, ENSMUSG00000032047	0.945951	0.253072
SP_PIR_KEYWORDS	disulfide bond	39	14.5522	0.0182137	ENSMUSG00000020000, ENSMUSG00000038264, ENSMUSG00000005397, ENSMUSG00000060703, ENSMUSG00000048583, ENSMUSG00000028691, ENSMUSG00000049130, ENSMUSG00000032978, ENSMUSG00000030111, ENSMUSG00000025220, ENSMUSG00000021728, ENSMUSG00000026390, ENSMUSG00000021242, ENSMUSG00000027612, ENSMUSG00000045394, ENSMUSG00000057130, ENSMUSG00000032855, ENSMUSG00000031722, ENSMUSG00000027298, ENSMUSG00000002847,…	0.995665	0.390205
SP_PIR_KEYWORDS	Steroid biosynthesis	4	1.49254	0.0221693	ENSMUSG00000027875, ENSMUSG00000021273, ENSMUSG00000031604, ENSMUSG00000029311	0.998688	0.424776
SP_PIR_KEYWORDS	endoplasmic reticulum	19	7.08955	0.0322056	ENSMUSG00000020000, ENSMUSG00000043162, ENSMUSG00000005514, ENSMUSG00000040236, ENSMUSG00000025935, ENSMUSG00000061273, ENSMUSG00000052428, ENSMUSG00000024083, ENSMUSG00000034785, ENSMUSG00000021928, ENSMUSG00000005413, ENSMUSG00000027879, ENSMUSG00000021273, ENSMUSG00000054545, ENSMUSG00000021236, ENSMUSG00000030062, ENSMUSG00000031604, ENSMUSG00000027706, ENSMUSG00000052914	0.999938	0.525439
SP_PIR_KEYWORDS	ribosomal protein	7	2.61194	0.0386254	ENSMUSG00000032399, ENSMUSG00000060938, ENSMUSG00000021967, ENSMUSG00000057863, ENSMUSG00000052962, ENSMUSG00000039209, ENSMUSG00000038274	0.999991	0.565188
SP_PIR_KEYWORDS	heme	5	1.86567	0.0464537	ENSMUSG00000026170, ENSMUSG00000005413, ENSMUSG00000058076, ENSMUSG00000063694, ENSMUSG00000052914	0.999999	0.608849
SP_PIR_KEYWORDS	lyase	6	2.23881	0.0467041	ENSMUSG00000029596, ENSMUSG00000040618, ENSMUSG00000025153, ENSMUSG00000026348, ENSMUSG00000028601, ENSMUSG00000020917	0.999999	0.587226
SP_PIR_KEYWORDS	nad	7	2.61194	0.0545522	ENSMUSG00000009292, ENSMUSG00000063229, ENSMUSG00000031641, ENSMUSG00000031604, ENSMUSG00000025153, ENSMUSG00000029455, ENSMUSG00000027227	1	0.623464
SP_PIR_KEYWORDS	beta-hydroxyasparagine	2	0.746269	0.0594408	ENSMUSG00000005397, ENSMUSG00000022912	1	0.634952
SP_PIR_KEYWORDS	magnesium	13	4.85075	0.0603121	ENSMUSG00000035891, ENSMUSG00000026648, ENSMUSG00000022229, ENSMUSG00000066324, ENSMUSG00000061273, ENSMUSG00000020917, ENSMUSG00000033618, ENSMUSG00000039055, ENSMUSG00000021273, ENSMUSG00000031644, ENSMUSG00000021236, ENSMUSG00000030972, ENSMUSG00000030935	1	0.620586
SP_PIR_KEYWORDS	sterol biosynthesis	3	1.1194	0.060918	ENSMUSG00000027875, ENSMUSG00000021273, ENSMUSG00000031604	1	0.605532
SP_PIR_KEYWORDS	selenocysteine	3	1.1194	0.0664573	ENSMUSG00000075705, ENSMUSG00000041571, ENSMUSG00000034785	1	0.620655
SP_PIR_KEYWORDS	signal	45	16.791	0.0778501	ENSMUSG00000020000, ENSMUSG00000038264, ENSMUSG00000005397, ENSMUSG00000060703, ENSMUSG00000048583, ENSMUSG00000032978, ENSMUSG00000030111, ENSMUSG00000021728, ENSMUSG00000038286, ENSMUSG00000029311, ENSMUSG00000078622, ENSMUSG00000021242, ENSMUSG00000078439, ENSMUSG00000022261, ENSMUSG00000027612, ENSMUSG00000045394, ENSMUSG00000032855, ENSMUSG00000031722, ENSMUSG00000054545, ENSMUSG00000030062,…	1	0.663937
SP_PIR_KEYWORDS	sulfation	3	1.1194	0.0780077	ENSMUSG00000005397, ENSMUSG00000049130, ENSMUSG00000040552	1	0.648395
SP_PIR_KEYWORDS	multifunctional enzyme	4	1.49254	0.0838251	ENSMUSG00000025648, ENSMUSG00000021273, ENSMUSG00000025220, ENSMUSG00000025153	1	0.660323
SP_PIR_KEYWORDS	selenium	3	1.1194	0.0840017	ENSMUSG00000075705, ENSMUSG00000041571, ENSMUSG00000034785	1	0.646139

## Sheet: GO_10
Category	Term	Count	%	PValue	Genes	Bonferroni	Benjamini
GOTERM_CC_FAT	GO:0005739~mitochondrion	42	15.6716	0.000636605	ENSMUSG00000029198, ENSMUSG00000028691, ENSMUSG00000063229, ENSMUSG00000058076, ENSMUSG00000029153, ENSMUSG00000031641, ENSMUSG00000029455, ENSMUSG00000038286, ENSMUSG00000052962, ENSMUSG00000020917, ENSMUSG00000063683, ENSMUSG00000024900, ENSMUSG00000026170, ENSMUSG00000022244, ENSMUSG00000028443, ENSMUSG00000040618, ENSMUSG00000021967, ENSMUSG00000054545, ENSMUSG00000028601, ENSMUSG00000024132,…	0.119585	0.119585
GOTERM_BP_FAT	GO:0055114~oxidation reduction	22	8.20896	0.00112459	ENSMUSG00000020000, ENSMUSG00000075705, ENSMUSG00000028691, ENSMUSG00000005514, ENSMUSG00000063229, ENSMUSG00000058076, ENSMUSG00000030861, ENSMUSG00000031641, ENSMUSG00000025153, ENSMUSG00000029455, ENSMUSG00000063694, ENSMUSG00000028378, ENSMUSG00000034785, ENSMUSG00000029311, ENSMUSG00000042096, ENSMUSG00000026170, ENSMUSG00000023094, ENSMUSG00000005413, ENSMUSG00000021273, ENSMUSG00000031604,…	0.70931	0.70931
GOTERM_CC_FAT	GO:0048770~pigment granule	8	2.98507	0.00199628	ENSMUSG00000021939, ENSMUSG00000028691, ENSMUSG00000027879, ENSMUSG00000030062, ENSMUSG00000030894, ENSMUSG00000025153, ENSMUSG00000001847, ENSMUSG00000022285	0.329449	0.181128
GOTERM_CC_FAT	GO:0042470~melanosome	8	2.98507	0.00199628	ENSMUSG00000021939, ENSMUSG00000028691, ENSMUSG00000027879, ENSMUSG00000030062, ENSMUSG00000030894, ENSMUSG00000025153, ENSMUSG00000001847, ENSMUSG00000022285	0.329449	0.181128
GOTERM_CC_FAT	GO:0044429~mitochondrial part	20	7.46269	0.0058513	ENSMUSG00000029198, ENSMUSG00000058076, ENSMUSG00000030861, ENSMUSG00000029153, ENSMUSG00000031641, ENSMUSG00000029455, ENSMUSG00000016252, ENSMUSG00000063694, ENSMUSG00000024900, ENSMUSG00000026170, ENSMUSG00000027875, ENSMUSG00000015790, ENSMUSG00000021967, ENSMUSG00000054545, ENSMUSG00000031633, ENSMUSG00000030935, ENSMUSG00000030972, ENSMUSG00000024782, ENSMUSG00000024132, ENSMUSG00000032047	0.690779	0.323777
GOTERM_CC_FAT	GO:0031980~mitochondrial lumen	10	3.73134	0.00631032	ENSMUSG00000029198, ENSMUSG00000030861, ENSMUSG00000021967, ENSMUSG00000031641, ENSMUSG00000029455, ENSMUSG00000063694, ENSMUSG00000030935, ENSMUSG00000024782, ENSMUSG00000030972, ENSMUSG00000024132	0.718061	0.271317
GOTERM_CC_FAT	GO:0005759~mitochondrial matrix	10	3.73134	0.00631032	ENSMUSG00000029198, ENSMUSG00000030861, ENSMUSG00000021967, ENSMUSG00000031641, ENSMUSG00000029455, ENSMUSG00000063694, ENSMUSG00000030935, ENSMUSG00000024782, ENSMUSG00000030972, ENSMUSG00000024132	0.718061	0.271317
GOTERM_CC_FAT	GO:0005625~soluble fraction	7	2.61194	0.00991889	ENSMUSG00000021939, ENSMUSG00000005514, ENSMUSG00000030894, ENSMUSG00000026348, ENSMUSG00000004951, ENSMUSG00000063694, ENSMUSG00000027227	0.863807	0.328832
GOTERM_BP_FAT	GO:0008202~steroid metabolic process	8	2.98507	0.0105526	ENSMUSG00000021928, ENSMUSG00000027875, ENSMUSG00000022244, ENSMUSG00000032114, ENSMUSG00000021273, ENSMUSG00000031604, ENSMUSG00000049313, ENSMUSG00000029311	0.999991	0.997045
GOTERM_BP_FAT	GO:0005996~monosaccharide metabolic process	9	3.35821	0.0120995	ENSMUSG00000025648, ENSMUSG00000024900, ENSMUSG00000048583, ENSMUSG00000032114, ENSMUSG00000022490, ENSMUSG00000063229, ENSMUSG00000021756, ENSMUSG00000040618, ENSMUSG00000054545	0.999998	0.988384
GOTERM_BP_FAT	GO:0006631~fatty acid metabolic process	9	3.35821	0.0125652	ENSMUSG00000024900, ENSMUSG00000030861, ENSMUSG00000031641, ENSMUSG00000031604, ENSMUSG00000025153, ENSMUSG00000030935, ENSMUSG00000028601, ENSMUSG00000030972, ENSMUSG00000024132	0.999999	0.968914
GOTERM_BP_FAT	GO:0009991~response to extracellular stimulus	7	2.61194	0.0156111	ENSMUSG00000027875, ENSMUSG00000032114, ENSMUSG00000005413, ENSMUSG00000063229, ENSMUSG00000054545, ENSMUSG00000026826, ENSMUSG00000020973	1	0.96842
GOTERM_CC_FAT	GO:0000267~cell fraction	19	7.08955	0.0168296	ENSMUSG00000035891, ENSMUSG00000032114, ENSMUSG00000054455, ENSMUSG00000005514, ENSMUSG00000001847, ENSMUSG00000063694, ENSMUSG00000034101, ENSMUSG00000034785, ENSMUSG00000078622, ENSMUSG00000024900, ENSMUSG00000021939, ENSMUSG00000005413, ENSMUSG00000020102, ENSMUSG00000054545, ENSMUSG00000030894, ENSMUSG00000026348, ENSMUSG00000004951, ENSMUSG00000027227, ENSMUSG00000052914	0.966445	0.432073
GOTERM_BP_FAT	GO:0006412~translation	11	4.10448	0.01758	ENSMUSG00000031029, ENSMUSG00000032399, ENSMUSG00000060938, ENSMUSG00000021967, ENSMUSG00000057863, ENSMUSG00000003808, ENSMUSG00000026083, ENSMUSG00000045983, ENSMUSG00000039209, ENSMUSG00000053740, ENSMUSG00000038274	1	0.961061
GOTERM_CC_FAT	GO:0005792~microsome	8	2.98507	0.0185994	ENSMUSG00000024900, ENSMUSG00000032114, ENSMUSG00000005514, ENSMUSG00000005413, ENSMUSG00000054545, ENSMUSG00000034785, ENSMUSG00000078622, ENSMUSG00000052914	0.976598	0.415159
GOTERM_BP_FAT	GO:0019318~hexose metabolic process	8	2.98507	0.0195166	ENSMUSG00000025648, ENSMUSG00000024900, ENSMUSG00000048583, ENSMUSG00000032114, ENSMUSG00000022490, ENSMUSG00000063229, ENSMUSG00000021756, ENSMUSG00000040618	1	0.95457
GOTERM_BP_FAT	GO:0006006~glucose metabolic process	7	2.61194	0.0204124	ENSMUSG00000024900, ENSMUSG00000048583, ENSMUSG00000032114, ENSMUSG00000022490, ENSMUSG00000063229, ENSMUSG00000021756, ENSMUSG00000040618	1	0.941022
GOTERM_BP_FAT	GO:0006694~steroid biosynthetic process	5	1.86567	0.0227178	ENSMUSG00000027875, ENSMUSG00000022244, ENSMUSG00000021273, ENSMUSG00000031604, ENSMUSG00000029311	1	0.939405
GOTERM_CC_FAT	GO:0042598~vesicular fraction	8	2.98507	0.0227985	ENSMUSG00000024900, ENSMUSG00000032114, ENSMUSG00000005514, ENSMUSG00000005413, ENSMUSG00000054545, ENSMUSG00000034785, ENSMUSG00000078622, ENSMUSG00000052914	0.990073	0.438172
GOTERM_BP_FAT	GO:0007584~response to nutrient	5	1.86567	0.0257068	ENSMUSG00000027875, ENSMUSG00000032114, ENSMUSG00000005413, ENSMUSG00000054545, ENSMUSG00000020973	1	0.942703
GOTERM_CC_FAT	GO:0019866~organelle inner membrane	12	4.47761	0.0349928	ENSMUSG00000024900, ENSMUSG00000026170, ENSMUSG00000027875, ENSMUSG00000015790, ENSMUSG00000024120, ENSMUSG00000058076, ENSMUSG00000054545, ENSMUSG00000031633, ENSMUSG00000029153, ENSMUSG00000016252, ENSMUSG00000024132, ENSMUSG00000032047	0.999194	0.546857
GOTERM_CC_FAT	GO:0005840~ribosome	8	2.98507	0.0354507	ENSMUSG00000032399, ENSMUSG00000060938, ENSMUSG00000021967, ENSMUSG00000057863, ENSMUSG00000052962, ENSMUSG00000039209, ENSMUSG00000053740, ENSMUSG00000038274	0.999267	0.514165
GOTERM_BP_FAT	GO:0016125~sterol metabolic process	5	1.86567	0.0379625	ENSMUSG00000021928, ENSMUSG00000027875, ENSMUSG00000021273, ENSMUSG00000031604, ENSMUSG00000049313	1	0.978998
GOTERM_BP_FAT	GO:0008610~lipid biosynthetic process	10	3.73134	0.0444932	ENSMUSG00000027875, ENSMUSG00000022244, ENSMUSG00000043162, ENSMUSG00000021273, ENSMUSG00000031641, ENSMUSG00000031604, ENSMUSG00000025153, ENSMUSG00000030935, ENSMUSG00000020917, ENSMUSG00000029311	1	0.984462
GOTERM_BP_FAT	GO:0009719~response to endogenous stimulus	7	2.61194	0.052519	ENSMUSG00000020091, ENSMUSG00000027875, ENSMUSG00000005413, ENSMUSG00000054545, ENSMUSG00000026826, ENSMUSG00000042903, ENSMUSG00000024143	1	0.989502
GOTERM_CC_FAT	GO:0005743~mitochondrial inner membrane	11	4.10448	0.0540124	ENSMUSG00000024900, ENSMUSG00000026170, ENSMUSG00000027875, ENSMUSG00000015790, ENSMUSG00000058076, ENSMUSG00000054545, ENSMUSG00000031633, ENSMUSG00000029153, ENSMUSG00000016252, ENSMUSG00000024132, ENSMUSG00000032047	0.999985	0.635621
GOTERM_BP_FAT	GO:0009791~post-embryonic development	5	1.86567	0.0578807	ENSMUSG00000032114, ENSMUSG00000032220, ENSMUSG00000026826, ENSMUSG00000066324, ENSMUSG00000078622	1	0.990685
GOTERM_BP_FAT	GO:0030091~protein repair	2	0.746269	0.0612344	ENSMUSG00000075705, ENSMUSG00000023094	1	0.990201
GOTERM_BP_FAT	GO:0035166~post-embryonic hemopoiesis	2	0.746269	0.0612344	ENSMUSG00000032114, ENSMUSG00000032220	1	0.990201
GOTERM_CC_FAT	GO:0030529~ribonucleoprotein complex	14	5.22388	0.071271	ENSMUSG00000060739, ENSMUSG00000056851, ENSMUSG00000032399, ENSMUSG00000052962, ENSMUSG00000038274, ENSMUSG00000026234, ENSMUSG00000060938, ENSMUSG00000057130, ENSMUSG00000021967, ENSMUSG00000057863, ENSMUSG00000025982, ENSMUSG00000053740, ENSMUSG00000039209, ENSMUSG00000047888	1	0.70838
GOTERM_BP_FAT	GO:0051147~regulation of muscle cell differentiation	3	1.1194	0.0760009	ENSMUSG00000020427, ENSMUSG00000041936, ENSMUSG00000042903	1	0.995592
GOTERM_BP_FAT	GO:0007626~locomotory behavior	7	2.61194	0.0823064	ENSMUSG00000061436, ENSMUSG00000032114, ENSMUSG00000049130, ENSMUSG00000040552, ENSMUSG00000026826, ENSMUSG00000001847, ENSMUSG00000046230	1	0.996103
GOTERM_CC_FAT	GO:0005783~endoplasmic reticulum	22	8.20896	0.0927198	ENSMUSG00000020000, ENSMUSG00000054455, ENSMUSG00000043162, ENSMUSG00000005514, ENSMUSG00000040236, ENSMUSG00000025935, ENSMUSG00000061273, ENSMUSG00000052428, ENSMUSG00000024083, ENSMUSG00000034785, ENSMUSG00000078622, ENSMUSG00000021928, ENSMUSG00000005413, ENSMUSG00000027879, ENSMUSG00000032239, ENSMUSG00000021273, ENSMUSG00000054545, ENSMUSG00000021236, ENSMUSG00000030062, ENSMUSG00000031604,…	1	0.776196
GOTERM_BP_FAT	GO:0031667~response to nutrient levels	5	1.86567	0.094694	ENSMUSG00000027875, ENSMUSG00000032114, ENSMUSG00000005413, ENSMUSG00000054545, ENSMUSG00000020973	1	0.997685
GOTERM_BP_FAT	GO:0009725~response to hormone stimulus	6	2.23881	0.0999316	ENSMUSG00000020091, ENSMUSG00000027875, ENSMUSG00000005413, ENSMUSG00000054545, ENSMUSG00000042903, ENSMUSG00000024143	1	0.997722

## Sheet: KEGG_10
Category	Term	Count	%	PValue	Genes	Bonferroni	Benjamini
KEGG_PATHWAY	mmu00650:Butanoate metabolism	5	1.86567	0.00576887	ENSMUSG00000027875, ENSMUSG00000029455, ENSMUSG00000030935, ENSMUSG00000030972, ENSMUSG00000032047	0.479918	0.479918
KEGG_PATHWAY	mmu03010:Ribosome	6	2.23881	0.00946264	ENSMUSG00000032399, ENSMUSG00000060938, ENSMUSG00000057863, ENSMUSG00000039209, ENSMUSG00000053740, ENSMUSG00000038274	0.658487	0.415609
KEGG_PATHWAY	mmu00071:Fatty acid metabolism	5	1.86567	0.0106464	ENSMUSG00000024900, ENSMUSG00000030861, ENSMUSG00000029455, ENSMUSG00000024132, ENSMUSG00000032047	0.701652	0.331798
KEGG_PATHWAY	mmu00240:Pyrimidine metabolism	7	2.61194	0.0239561	ENSMUSG00000033427, ENSMUSG00000028443, ENSMUSG00000028633, ENSMUSG00000026839, ENSMUSG00000021236, ENSMUSG00000024782, ENSMUSG00000028719	0.935429	0.495909
KEGG_PATHWAY	mmu00620:Pyruvate metabolism	4	1.49254	0.0560168	ENSMUSG00000063229, ENSMUSG00000040618, ENSMUSG00000029455, ENSMUSG00000032047	0.998518	0.728236
KEGG_PATHWAY	mmu00280:Valine, leucine and isoleucine degradation	4	1.49254	0.0901328	ENSMUSG00000027875, ENSMUSG00000030861, ENSMUSG00000029455, ENSMUSG00000032047	0.999977	0.831182

## Sheet: FC_15
Category	Term	Count	%	PValue	Genes	Bonferroni	Benjamini
SP_PIR_KEYWORDS	mitochondrion	21	13.7255	0.000100353	ENSMUSG00000029198, ENSMUSG00000043162, ENSMUSG00000058076, ENSMUSG00000030861, ENSMUSG00000029455, ENSMUSG00000016252, ENSMUSG00000035948, ENSMUSG00000052962, ENSMUSG00000063683, ENSMUSG00000024900, ENSMUSG00000026170, ENSMUSG00000027875, ENSMUSG00000023094, ENSMUSG00000022244, ENSMUSG00000015790, ENSMUSG00000040618, ENSMUSG00000031633, ENSMUSG00000028601, ENSMUSG00000030972, ENSMUSG00000024132,…	0.02272	0.02272
SP_PIR_KEYWORDS	transit peptide	15	9.80392	0.000279288	ENSMUSG00000029198, ENSMUSG00000043162, ENSMUSG00000030861, ENSMUSG00000058076, ENSMUSG00000029455, ENSMUSG00000035948, ENSMUSG00000052962, ENSMUSG00000026170, ENSMUSG00000027875, ENSMUSG00000023094, ENSMUSG00000040618, ENSMUSG00000030972, ENSMUSG00000028601, ENSMUSG00000024132, ENSMUSG00000032047	0.061963	0.0314769
SP_PIR_KEYWORDS	oxidoreductase	14	9.15033	0.000791265	ENSMUSG00000020000, ENSMUSG00000075705, ENSMUSG00000028691, ENSMUSG00000030861, ENSMUSG00000029455, ENSMUSG00000034785, ENSMUSG00000028378, ENSMUSG00000029311, ENSMUSG00000042096, ENSMUSG00000026170, ENSMUSG00000023094, ENSMUSG00000005413, ENSMUSG00000027227, ENSMUSG00000052914	0.165791	0.0586345
SP_PIR_KEYWORDS	fatty acid metabolism	5	3.26797	0.00337417	ENSMUSG00000024900, ENSMUSG00000030861, ENSMUSG00000028601, ENSMUSG00000030972, ENSMUSG00000024132	0.538831	0.175928
SP_PIR_KEYWORDS	protease inhibitor	4	2.61438	0.00931714	ENSMUSG00000047104, ENSMUSG00000027447, ENSMUSG00000030111, ENSMUSG00000021081	0.882771	0.348661
SP_PIR_KEYWORDS	acetylation	34	22.2222	0.0204554	ENSMUSG00000029198, ENSMUSG00000031762, ENSMUSG00000028691, ENSMUSG00000054455, ENSMUSG00000029153, ENSMUSG00000029455, ENSMUSG00000038286, ENSMUSG00000063683, ENSMUSG00000007564, ENSMUSG00000024900, ENSMUSG00000026170, ENSMUSG00000009292, ENSMUSG00000060938, ENSMUSG00000028443, ENSMUSG00000054545, ENSMUSG00000030062, ENSMUSG00000024132, ENSMUSG00000032047, ENSMUSG00000030861, ENSMUSG00000040225,…	0.991199	0.545616
SP_PIR_KEYWORDS	selenocysteine	3	1.96078	0.0238304	ENSMUSG00000075705, ENSMUSG00000041571, ENSMUSG00000034785	0.996007	0.545717
SP_PIR_KEYWORDS	endoplasmic reticulum	13	8.49673	0.0255767	ENSMUSG00000020000, ENSMUSG00000040236, ENSMUSG00000043162, ENSMUSG00000025935, ENSMUSG00000052428, ENSMUSG00000034785, ENSMUSG00000021928, ENSMUSG00000005413, ENSMUSG00000054545, ENSMUSG00000030062, ENSMUSG00000021236, ENSMUSG00000027706, ENSMUSG00000052914	0.99735	0.523677
SP_PIR_KEYWORDS	selenium	3	1.96078	0.030629	ENSMUSG00000075705, ENSMUSG00000041571, ENSMUSG00000034785	0.999194	0.546846
SP_PIR_KEYWORDS	lipid metabolism	5	3.26797	0.0307446	ENSMUSG00000024900, ENSMUSG00000030861, ENSMUSG00000028601, ENSMUSG00000030972, ENSMUSG00000024132	0.999216	0.510858
SP_PIR_KEYWORDS	heme	4	2.61438	0.0416617	ENSMUSG00000026170, ENSMUSG00000005413, ENSMUSG00000058076, ENSMUSG00000052914	0.999941	0.58766
SP_PIR_KEYWORDS	Serine protease inhibitor	3	1.96078	0.0434175	ENSMUSG00000047104, ENSMUSG00000030111, ENSMUSG00000021081	0.999962	0.571333
SP_PIR_KEYWORDS	Acyltransferase	5	3.26797	0.0531372	ENSMUSG00000024900, ENSMUSG00000025220, ENSMUSG00000024973, ENSMUSG00000063683, ENSMUSG00000032047	0.999996	0.617803
SP_PIR_KEYWORDS	Monooxygenase	3	1.96078	0.0802898	ENSMUSG00000020000, ENSMUSG00000026170, ENSMUSG00000052914	1	0.745649

## Sheet: GO_15
Category	Term	Count	%	PValue	Genes	Bonferroni	Benjamini
GOTERM_CC_FAT	GO:0005739~mitochondrion	27	17.6471	0.000913068	ENSMUSG00000029198, ENSMUSG00000028691, ENSMUSG00000058076, ENSMUSG00000029153, ENSMUSG00000029455, ENSMUSG00000052962, ENSMUSG00000038286, ENSMUSG00000063683, ENSMUSG00000024900, ENSMUSG00000026170, ENSMUSG00000022244, ENSMUSG00000028443, ENSMUSG00000040618, ENSMUSG00000054545, ENSMUSG00000028601, ENSMUSG00000024132, ENSMUSG00000032047, ENSMUSG00000043162, ENSMUSG00000030861, ENSMUSG00000035948,…	0.135978	0.135978
GOTERM_CC_FAT	GO:0005743~mitochondrial inner membrane	11	7.18954	0.00111188	ENSMUSG00000024900, ENSMUSG00000026170, ENSMUSG00000027875, ENSMUSG00000015790, ENSMUSG00000058076, ENSMUSG00000054545, ENSMUSG00000031633, ENSMUSG00000029153, ENSMUSG00000016252, ENSMUSG00000024132, ENSMUSG00000032047	0.163057	0.0851542
GOTERM_CC_FAT	GO:0044429~mitochondrial part	15	9.80392	0.00143411	ENSMUSG00000029198, ENSMUSG00000058076, ENSMUSG00000030861, ENSMUSG00000029153, ENSMUSG00000029455, ENSMUSG00000016252, ENSMUSG00000024900, ENSMUSG00000026170, ENSMUSG00000027875, ENSMUSG00000015790, ENSMUSG00000054545, ENSMUSG00000031633, ENSMUSG00000030972, ENSMUSG00000024132, ENSMUSG00000032047	0.205166	0.0736848
GOTERM_BP_FAT	GO:0055114~oxidation reduction	15	9.80392	0.00144345	ENSMUSG00000020000, ENSMUSG00000075705, ENSMUSG00000028691, ENSMUSG00000030861, ENSMUSG00000058076, ENSMUSG00000029455, ENSMUSG00000034785, ENSMUSG00000028378, ENSMUSG00000029311, ENSMUSG00000042096, ENSMUSG00000026170, ENSMUSG00000023094, ENSMUSG00000005413, ENSMUSG00000027227, ENSMUSG00000052914	0.672132	0.672132
GOTERM_CC_FAT	GO:0019866~organelle inner membrane	11	7.18954	0.00169154	ENSMUSG00000024900, ENSMUSG00000026170, ENSMUSG00000027875, ENSMUSG00000015790, ENSMUSG00000058076, ENSMUSG00000054545, ENSMUSG00000031633, ENSMUSG00000029153, ENSMUSG00000016252, ENSMUSG00000024132, ENSMUSG00000032047	0.237289	0.0654769
GOTERM_BP_FAT	GO:0009719~response to endogenous stimulus	7	4.57516	0.00391614	ENSMUSG00000020091, ENSMUSG00000027875, ENSMUSG00000005413, ENSMUSG00000054545, ENSMUSG00000026826, ENSMUSG00000042903, ENSMUSG00000024143	0.951645	0.780103
GOTERM_CC_FAT	GO:0031966~mitochondrial membrane	11	7.18954	0.00525807	ENSMUSG00000024900, ENSMUSG00000026170, ENSMUSG00000027875, ENSMUSG00000015790, ENSMUSG00000058076, ENSMUSG00000054545, ENSMUSG00000031633, ENSMUSG00000029153, ENSMUSG00000016252, ENSMUSG00000024132, ENSMUSG00000032047	0.569802	0.155239
GOTERM_CC_FAT	GO:0005740~mitochondrial envelope	11	7.18954	0.00815527	ENSMUSG00000024900, ENSMUSG00000026170, ENSMUSG00000027875, ENSMUSG00000015790, ENSMUSG00000058076, ENSMUSG00000054545, ENSMUSG00000031633, ENSMUSG00000029153, ENSMUSG00000016252, ENSMUSG00000024132, ENSMUSG00000032047	0.730232	0.196168
GOTERM_BP_FAT	GO:0009725~response to hormone stimulus	6	3.92157	0.0121829	ENSMUSG00000020091, ENSMUSG00000027875, ENSMUSG00000005413, ENSMUSG00000054545, ENSMUSG00000042903, ENSMUSG00000024143	0.999922	0.957333
GOTERM_BP_FAT	GO:0007584~response to nutrient	4	2.61438	0.0249633	ENSMUSG00000027875, ENSMUSG00000005413, ENSMUSG00000054545, ENSMUSG00000020973	1	0.992396
GOTERM_BP_FAT	GO:0009991~response to extracellular stimulus	5	3.26797	0.0265899	ENSMUSG00000027875, ENSMUSG00000005413, ENSMUSG00000054545, ENSMUSG00000026826, ENSMUSG00000020973	1	0.984409
GOTERM_BP_FAT	GO:0010033~response to organic substance	9	5.88235	0.0282542	ENSMUSG00000020091, ENSMUSG00000027875, ENSMUSG00000054455, ENSMUSG00000005413, ENSMUSG00000049130, ENSMUSG00000054545, ENSMUSG00000026826, ENSMUSG00000042903, ENSMUSG00000024143	1	0.974971
GOTERM_CC_FAT	GO:0031090~organelle membrane	16	10.4575	0.0299146	ENSMUSG00000054455, ENSMUSG00000043162, ENSMUSG00000058076, ENSMUSG00000029153, ENSMUSG00000016252, ENSMUSG00000024900, ENSMUSG00000026170, ENSMUSG00000027875, ENSMUSG00000025351, ENSMUSG00000015790, ENSMUSG00000032239, ENSMUSG00000054545, ENSMUSG00000030062, ENSMUSG00000031633, ENSMUSG00000024132, ENSMUSG00000032047	0.992245	0.500526
GOTERM_BP_FAT	GO:0030091~protein repair	2	1.30719	0.0346358	ENSMUSG00000075705, ENSMUSG00000023094	1	0.979504
GOTERM_BP_FAT	GO:0043434~response to peptide hormone stimulus	4	2.61438	0.0449136	ENSMUSG00000020091, ENSMUSG00000027875, ENSMUSG00000042903, ENSMUSG00000024143	1	0.988139
GOTERM_CC_FAT	GO:0005783~endoplasmic reticulum	15	9.80392	0.0491618	ENSMUSG00000020000, ENSMUSG00000054455, ENSMUSG00000043162, ENSMUSG00000040236, ENSMUSG00000025935, ENSMUSG00000052428, ENSMUSG00000034785, ENSMUSG00000021928, ENSMUSG00000005413, ENSMUSG00000032239, ENSMUSG00000054545, ENSMUSG00000030062, ENSMUSG00000021236, ENSMUSG00000027706, ENSMUSG00000052914	0.999686	0.635135
GOTERM_BP_FAT	GO:0033554~cellular response to stress	9	5.88235	0.051723	ENSMUSG00000033902, ENSMUSG00000061436, ENSMUSG00000028691, ENSMUSG00000054455, ENSMUSG00000005413, ENSMUSG00000031644, ENSMUSG00000026648, ENSMUSG00000042903, ENSMUSG00000059772	1	0.989491
GOTERM_CC_FAT	GO:0005792~microsome	5	3.26797	0.0649442	ENSMUSG00000024900, ENSMUSG00000005413, ENSMUSG00000054545, ENSMUSG00000034785, ENSMUSG00000052914	0.999978	0.696921
GOTERM_CC_FAT	GO:0031967~organelle envelope	11	7.18954	0.0687976	ENSMUSG00000024900, ENSMUSG00000026170, ENSMUSG00000027875, ENSMUSG00000015790, ENSMUSG00000058076, ENSMUSG00000054545, ENSMUSG00000031633, ENSMUSG00000029153, ENSMUSG00000016252, ENSMUSG00000024132, ENSMUSG00000032047	0.999989	0.680328
GOTERM_BP_FAT	GO:0032869~cellular response to insulin stimulus	3	1.96078	0.0690862	ENSMUSG00000020091, ENSMUSG00000042903, ENSMUSG00000024143	1	0.996021
GOTERM_CC_FAT	GO:0031975~envelope	11	7.18954	0.0704025	ENSMUSG00000024900, ENSMUSG00000026170, ENSMUSG00000027875, ENSMUSG00000015790, ENSMUSG00000058076, ENSMUSG00000054545, ENSMUSG00000031633, ENSMUSG00000029153, ENSMUSG00000016252, ENSMUSG00000024132, ENSMUSG00000032047	0.999992	0.654192
GOTERM_BP_FAT	GO:0031667~response to nutrient levels	4	2.61438	0.0727965	ENSMUSG00000027875, ENSMUSG00000005413, ENSMUSG00000054545, ENSMUSG00000020973	1	0.995031
GOTERM_CC_FAT	GO:0042598~vesicular fraction	5	3.26797	0.0732725	ENSMUSG00000024900, ENSMUSG00000005413, ENSMUSG00000054545, ENSMUSG00000034785, ENSMUSG00000052914	0.999995	0.637456
GOTERM_BP_FAT	GO:0005996~monosaccharide metabolic process	5	3.26797	0.0946938	ENSMUSG00000024900, ENSMUSG00000048583, ENSMUSG00000022490, ENSMUSG00000040618, ENSMUSG00000054545	1	0.998338
GOTERM_BP_FAT	GO:0006631~fatty acid metabolic process	5	3.26797	0.0964763	ENSMUSG00000024900, ENSMUSG00000030861, ENSMUSG00000028601, ENSMUSG00000030972, ENSMUSG00000024132	1	0.997582

## Sheet: KEGG_15
Category	Term	Count	%	PValue	Genes	Bonferroni	Benjamini
KEGG_PATHWAY	mmu00071:Fatty acid metabolism	5	3.26797	0.00122863	ENSMUSG00000024900, ENSMUSG00000030861, ENSMUSG00000029455, ENSMUSG00000024132, ENSMUSG00000032047	0.0925539	0.0925539
KEGG_PATHWAY	mmu00650:Butanoate metabolism	4	2.61438	0.00740385	ENSMUSG00000027875, ENSMUSG00000029455, ENSMUSG00000030972, ENSMUSG00000032047	0.444052	0.254381
KEGG_PATHWAY	mmu00280:Valine, leucine and isoleucine degradation	4	2.61438	0.0203674	ENSMUSG00000027875, ENSMUSG00000030861, ENSMUSG00000029455, ENSMUSG00000032047	0.803213	0.418345
KEGG_PATHWAY	mmu04610:Complement and coagulation cascades	4	2.61438	0.0332131	ENSMUSG00000049130, ENSMUSG00000040552, ENSMUSG00000030111, ENSMUSG00000022912	0.930637	0.486805
KEGG_PATHWAY	mmu00240:Pyrimidine metabolism	5	3.26797	0.0342893	ENSMUSG00000033427, ENSMUSG00000028443, ENSMUSG00000026839, ENSMUSG00000021236, ENSMUSG00000028719	0.936479	0.423786
KEGG_PATHWAY	mmu03320:PPAR signaling pathway	4	2.61438	0.0472064	ENSMUSG00000024900, ENSMUSG00000026170, ENSMUSG00000027875, ENSMUSG00000040618	0.978077	0.470965
KEGG_PATHWAY	mmu00980:Metabolism of xenobiotics by cytochrome P450	3	1.96078	0.0539726	ENSMUSG00000004035, ENSMUSG00000054545, ENSMUSG00000004032	0.987515	0.465367
KEGG_PATHWAY	mmu00983:Drug metabolism	3	1.96078	0.0539726	ENSMUSG00000033427, ENSMUSG00000054545, ENSMUSG00000026839	0.987515	0.465367
KEGG_PATHWAY	mmu00982:Drug metabolism	3	1.96078	0.057916	ENSMUSG00000004035, ENSMUSG00000054545, ENSMUSG00000004032	0.991024	0.445202
KEGG_PATHWAY	mmu00380:Tryptophan metabolism	3	1.96078	0.0790232	ENSMUSG00000029455, ENSMUSG00000026348, ENSMUSG00000032047	0.998502	0.514507
KEGG_PATHWAY	mmu00620:Pyruvate metabolism	3	1.96078	0.0834978	ENSMUSG00000040618, ENSMUSG00000029455, ENSMUSG00000032047	0.99898	0.497825
KEGG_PATHWAY	mmu00072:Synthesis and degradation of ketone bodies	2	1.30719	0.0874517	ENSMUSG00000027875, ENSMUSG00000032047	0.999275	0.48172
